# Supplementary material
Source: publisher figshare collection journal article supplement (https://gsapubs.figshare.com/articles/dataset/_/23787267)
Supplement: Supplementary file 1 [file 1]

## Sheet: ReadMe
Supplementary Item S3: Detrital zircon U-Pb analytical results																						Kortyna, C., Stockli, D.F., Lawton, T.F., Covault, J.A., and Sharman, G.R., 2023, Impact of Mexican Border rift structural inheritance on Laramide rivers of the Tornillo basin, west Texas: Insights from detrital zircon provenance: Geosphere, v. 19, https://doi.org/10.1130/GES02516.1
This excel file contains detrital zircon U-Pb data presented in Kortyna et al. (2023), "Impact of Border rift structural inheritance on Laramide rivers of the Tornillo basin, west Texas: Insights from detrital zircon provenance"
In addition to this supplemental item, these data will be housed on geochron.org
Please refer to Kortyna et al. (2023) methods for discordance filters and best age determination.
Detrital zircon data are stored in the following excel sheets:
Samples: Contains detrital zircon sample and formation names and GPS coordinates.
All_data: This sheet contains all detrital zircon U-Pb analytical results from each sample (includes discordant data, excludes standards).
Core_rims: This sheet contains detrital zircon U-Pb analyses with core-rim age pairs.
Sheets Named by Sample: These sheets, named by the detrital zircon samples included, contain the detrital zircon U-Pb analytical results, including primary and secondary standards.

## Sheet: Samples
Sample_ID	Unit	Locale	Basin	Latitude	Longitude
16TO-01	Javelina Fm	Tornillo Flat	Tornillo	29.4638	-103.183
16TO-02	Black Peaks Fm	Tornillo Flat	Tornillo	29.462	-103.183
16TO-03	Black Peaks Fm	Tornillo Flat	Tornillo	29.455	-103.181
16TO-04	Black Peaks Fm	Tornillo Flat	Tornillo	29.4515	-103.175
16TO-05	Black Peaks Fm	Tornillo Flat	Tornillo	29.4467	-103.174
16TO-06	Black Peaks Fm	Tornillo Flat	Tornillo	29.4437	-103.173
16TO-07	Black Peaks Fm	Tornillo Flat	Tornillo	29.4413	-103.176
16TO-08	Black Peaks Fm	Tornillo Flat	Tornillo	29.4393	-103.172
16TO-09	Black Peaks Fm	Tornillo Flat	Tornillo	29.4336	-103.155
16TO-10	Black Peaks Fm	Tornillo Flat	Tornillo	29.4338	-103.156
16TO-11	Hannold Hill Fm	Tornillo Flat	Tornillo	29.4286	-103.151
16TO-12	Hannold Hill Fm	Tornillo Flat	Tornillo	29.4261	-103.148
16TO-13	Canoe Fm	Tornillo Flat	Tornillo	29.4255	-103.147
16TO-14	Canoe Fm	Tornillo Flat	Tornillo	29.408	-103.146
16TO-15	Hannold Hill Fm	Tornillo Flat	Tornillo	29.4077	-103.156
16TO-16	Canoe Fm	Tornillo Flat	Tornillo	29.4076	-103.156
16TO-17	Aguja Fm	Dawson Creek	Tornillo	29.301	-103.508
16TO-18	Aguja Fm	Dawson Creek	Tornillo	29.3	-103.512
16TO-19	Aguja Fm	Dawson Creek	Tornillo	29.2952	-103.521
16TO-20	Javelina Fm	Dawson Creek	Tornillo	29.2934	-103.521
16TO-21	Black Peaks Fm	Glenn Springs	Tornillo	29.161	-103.144
16TO-22	Black Peaks Fm	Glenn Springs	Tornillo	29.1631	-103.146
18TO-01	Hannold Hill Fm	Tornillo Flat	Tornillo	29.4348	-103.168
18TO-02	Javelina Fm	Dawson Creek	Tornillo	29.2913	-103.526
18TO-03	Canoe Fm	Dawson Creek	Tornillo	29.2896	-103.528
18TO-04	Canoe Fm	Dawson Creek	Tornillo	29.2899	-103.528
18TO-05	Canoe Fm	Dawson Creek	Tornillo	29.2897	-103.529
18TO-06	Black Peaks Fm	Dawson Creek	Tornillo	29.2917	-103.53

## Sheet: All_data
Sample Name:				2σ Prop		2σ Prop		207/235	2σ Prop	206/238	2σ Prop	207/206	2σ Prop	Best age	2σ Prop
Grain #	[U] ppm	U/Th	207/235	error	206/238	error	RHO	Age Ma	error	Age (Ma)	error	Age (Ma)	error	(Ma)	error	% Discordance*	Rim/Core
16TO-01_1.FIN2	665	1.661	0.0916	0.0031	0.01364	0.00033	0.44818	88.9	2.9	87.3	2.1	124	60	87.3	2.1	1.79978
16TO-01_2.FIN2	1005	3.267	0.0672	0.0022	0.01046	0.00021	0.26325	66	2.1	67.05	1.3	41	58	67.05	1.3	1.59091
16TO-01_3.FIN2	233.6	2.269	0.0958	0.0046	0.01459	0.00046	0.19649	92.6	4.3	93.4	2.9	115	96	93.4	2.9	0.863931
16TO-01_4.FIN2	273	1.633	0.0685	0.0037	0.0107	0.00025	0.14165	67.5	3.6	68.6	1.6	14	94	68.6	1.6	1.62963
16TO-01_5.FIN2	540	1.377	0.0753	0.0037	0.01167	0.00033	0.12724	74	3.4	74.8	2.1	82	93	74.8	2.1	1.08108
16TO-01_6.FIN2	181.1	1.753	0.0682	0.0042	0.01038	0.00031	0.16203	67.5	4.1	66.6	2	130	110	66.6	2	1.33333
16TO-01_7.FIN2	792	1.029	0.0705	0.0022	0.01076	0.00025	0.20791	69.2	2.1	69	1.6	120	59	69	1.6	0.289017
16TO-01_8.FIN2	446	5.54	0.0692	0.0025	0.01039	0.00026	0.18076	68.1	2.4	66.6	1.7	126	71	66.6	1.7	2.20264
16TO-01_9.FIN2	282	1.908	0.0691	0.0034	0.01056	0.00029	0.10403	68.1	3.2	67.7	1.9	90	95	67.7	1.9	0.587372
16TO-01_10.FIN2	282	1.317	0.0763	0.0049	0.01104	0.00038	0.12911	74.5	4.6	70.8	2.4	180	130	70.8	2.4	4.96644
16TO-01_11.FIN2	89.1	1.117	0.0789	0.0066	0.01122	0.00041	0.043383	76.6	6.2	71.9	2.6	240	160	71.9	2.6	6.13577
16TO-01_12.FIN2	690	1.284	0.0843	0.0039	0.01269	0.00032	0.39692	82	3.6	81.3	2	87	70	81.3	2	0.853659
16TO-01_13.FIN2	196.1	1.148	0.0715	0.0065	0.01047	0.00038	0.024453	71	6.4	67.1	2.4	180	170	67.1	2.4	5.49296
16TO-01_14.FIN2	88.4	0.931	0.0682	0.0066	0.01103	0.00039	0.15209	66.5	6.2	70.7	2.5	-20	160	70.7	2.5	6.31579
16TO-01_15.FIN2	415	1.328	0.0687	0.0031	0.01055	0.0003	0.0075706	67.3	2.9	67.6	1.9	104	94	67.6	1.9	0.445765
16TO-01_16.FIN2	440	0.859	0.07	0.0031	0.01061	0.00025	0.041879	68.6	2.9	68	1.6	107	84	68	1.6	0.874636
16TO-01_17.FIN2	356	1.56	0.1085	0.004	0.01612	0.00041	0.15667	104.7	3.7	103.1	2.6	143	71	103.1	2.6	1.52818
16TO-01_18.FIN2	286	1.74	0.0887	0.0051	0.01392	0.00041	0.089689	87.5	4.6	89.1	2.6	100	100	89.1	2.6	1.82857
16TO-01_19.FIN2	203	0.95	0.573	0.016	0.0744	0.0018	0.20816	461.1	10	463.3	11	456	62	463.3	11	0.47712
16TO-01_20.FIN2	176.9	2.631	0.0839	0.0048	0.01222	0.00036	0.070121	81.5	4.5	78.3	2.3	200	110	78.3	2.3	3.92638
16TO-01_21.FIN2	284	1.491	0.0954	0.0046	0.01411	0.00035	0.27692	93.1	4.3	90.3	2.2	157	87	90.3	2.2	3.00752
16TO-01_22.FIN2	1390	7.97	0.4516	0.011	0.06058	0.0014	0.39848	378.8	7.8	379.1	8.3	406	46	379.1	8.3	0.0791975
16TO-01_23.FIN2	221.5	1.681	0.0678	0.0036	0.01039	0.00026	0.043635	66.5	3.4	66.7	1.6	94	96	66.7	1.6	0.300752
16TO-01_24.FIN2	70	0.683	4.31	0.13	0.3004	0.008	0.48581	1692	25	1693	40	1673	47	1673	47	1.19546
16TO-01_25.FIN2	431	0.868	0.0757	0.0041	0.01139	0.00042	0.02827	74.1	3.9	73	2.7	170	120	73	2.7	1.48448
16TO-01_26.FIN2	445	2.02	0.0865	0.0034	0.01329	0.00037	0.19386	84.1	3.2	85.1	2.3	67	82	85.1	2.3	1.18906
16TO-01_27.FIN2	179.4	1.14	0.0744	0.005	0.01087	0.00031	0.086875	72.6	4.7	69.7	2	160	130	69.7	2	3.99449
16TO-01_28.FIN2	203.5	1.518	0.101	0.0052	0.01477	0.00044	0.16052	97.4	4.8	94.5	2.8	185	99	94.5	2.8	2.97741
16TO-01_29.FIN2	593	1.455	0.0845	0.0033	0.01268	0.0003	0.1049	82.3	3.1	81.2	1.9	136	78	81.2	1.9	1.33657
16TO-01_30.FIN2	815	1.94	0.0863	0.0032	0.01332	0.00035	0.43565	84	3	85.3	2.3	69	63	85.3	2.3	1.54762
16TO-01_31.FIN2	579	2.76	0.0714	0.0026	0.0109	0.00027	0.1909	70.2	2.4	69.9	1.7	113	70	69.9	1.7	0.42735
16TO-01_32.FIN2	348	1.576	0.0929	0.0046	0.01389	0.0004	0.21676	90	4.3	88.9	2.5	174	93	88.9	2.5	1.22222
16TO-01_33.FIN2	73.3	1.504	0.114	0.01	0.01509	0.00071	0.056632	109	9.5	96.6	4.5	350	190	96.6	4.5	11.3761
16TO-01_34.FIN2	96.1	0.653	0.0891	0.0087	0.012	0.00035	0.050134	85.7	8	76.9	2.2	280	180	76.9	2.2	10.2684
16TO-01_35.FIN2	474	0.873	0.1788	0.0055	0.0265	0.00068	0.26153	167.6	4.9	168.6	4.3	191	64	168.6	4.3	0.596659
16TO-01_36.FIN2	695	1.143	0.0722	0.0029	0.01086	0.00028	0.12522	70.7	2.7	69.6	1.8	135	80	69.6	1.8	1.55587
16TO-01_37.FIN2	456	5.25	0.0743	0.0036	0.01097	0.0003	0.19412	72.7	3.4	70.4	1.9	190	92	70.4	1.9	3.16369
16TO-01_38.FIN2	293.6	2.974	3.538	0.11	0.271	0.0089	0.52818	1534	24	1545	45	1536	61	1536	61	0.585938
16TO-01_39.FIN2	168	1.741	0.098	0.0084	0.01481	0.00044	0.24416	95.3	7.5	94.7	2.8	140	150	94.7	2.8	0.629591
16TO-01_40.FIN2	66.8	0.844	0.0789	0.0087	0.01195	0.00056	0.15331	76.9	8.1	76.6	3.6	140	200	76.6	3.6	0.390117
16TO-01_41.FIN2	469	1.571	0.0719	0.0031	0.011	0.00027	0.084949	70.4	3	70.5	1.7	144	86	70.5	1.7	0.142045
16TO-01_42.FIN2	872	0.84	0.054	0.0025	0.00902	0.00023	0.24911	53.3	2.4	57.9	1.4	144	87	57.9	1.4	8.63039
16TO-01_43.FIN2	146.3	1.225	0.126	0.0087	0.01831	0.001	0.30713	119.6	7.8	116.9	6.4	180	130	116.9	6.4	2.25753
16TO-01_44.FIN2	859	3.25	0.283	0.0092	0.04048	0.0012	0.45544	252.9	7.3	255.8	7.4	245	64	255.8	7.4	1.1467
16TO-01_45.FIN2	74.1	2.016	0.0732	0.0073	0.01119	0.00044	0.0052762	72.2	6.7	71.7	2.8	190	180	71.7	2.8	0.692521
16TO-01_46.FIN2	282	1.316	0.067	0.0039	0.01069	0.00044	0.21574	65.6	3.7	68.8	2.9	80	110	68.8	2.9	4.87805
16TO-01_47.FIN2	392.5	0.903	0.0769	0.0037	0.01181	0.00035	0.27803	75	3.5	75.7	2.2	116	89	75.7	2.2	0.933333
16TO-01_48.FIN2	212	2.415	0.1275	0.006	0.01963	0.00058	0.11552	122.5	5.3	125.3	3.7	75	93	125.3	3.7	2.28571
16TO-01_49.FIN2	217.6	1.334	0.0705	0.004	0.01052	0.00029	0.12594	69.3	3.7	67.5	1.9	130	110	67.5	1.9	2.5974
16TO-01_50.FIN2	90.1	0.611	0.0703	0.0074	0.01019	0.00042	0.23989	69.2	6.8	65.3	2.7	130	170	65.3	2.7	5.63584
16TO-01_51.FIN2	265	2.144	0.0708	0.0044	0.0105	0.0005	0.41586	69.2	4.1	67.3	3.2	150	110	67.3	3.2	2.74566
16TO-01_52.FIN2	259	1.702	0.0732	0.004	0.01137	0.00037	0.14196	71.5	3.8	72.9	2.3	110	110	72.9	2.3	1.95804
16TO-01_53.FIN2	213	2.7	0.0858	0.0091	0.01091	0.00087	0.56875	83.2	8.5	69.9	5.5	420	180	DISC	DISC	15.9856
16TO-01_54.FIN2	275.3	1.779	0.0928	0.004	0.01449	0.00038	0.07538	89.9	3.7	92.7	2.4	31	88	92.7	2.4	3.11457
16TO-01_55.FIN2	527	1.925	0.106	0.0038	0.01617	0.00043	0.18881	102.1	3.5	103.4	2.7	95	72	103.4	2.7	1.27326
16TO-01_56.FIN2	613	3.98	3.62	0.13	0.268	0.0094	0.54792	1557	28	1535	46	1578	58	1578	58	2.72497
16TO-01_57.FIN2	710	15.8	2.021	0.055	0.1908	0.0051	0.68688	1122	18	1125	28	1368	37	1368	37	17.7632
16TO-01_58.FIN2	434	1.878	0.0855	0.0037	0.01168	0.00026	0.1135	83.2	3.5	74.8	1.7	293	93	74.8	1.7	10.0962
16TO-01_59.FIN2	121.5	1.459	0.0754	0.0069	0.01152	0.0005	0.049746	73.4	6.5	73.8	3.2	60	160	73.8	3.2	0.544959
16TO-01_60.FIN2	297	0.991	0.0984	0.0049	0.01507	0.0004	0.17404	95	4.5	96.4	2.5	57	93	96.4	2.5	1.47368
16TO-01_61.FIN2	148	0.707	0.0729	0.0055	0.01128	0.00045	0.23177	71.5	5.2	72.3	2.9	130	130	72.3	2.9	1.11888
16TO-01_62.FIN2	595	0.771	0.0929	0.0065	0.01334	0.00065	0.29031	90.1	6	85.4	4.1	250	170	85.4	4.1	5.21643
16TO-01_63.FIN2	552	2.338	0.0796	0.0035	0.012	0.00038	0.20715	77.6	3.3	76.9	2.4	115	90	76.9	2.4	0.902062
16TO-01_64.FIN2	44.9	4.15	3.42	0.16	0.2623	0.0092	0.5867	1503	36	1505	46	1524	64	1524	64	1.24672
16TO-01_65.FIN2	75.2	2.202	0.0645	0.0075	0.01062	0.00041	0.27628	62.7	7.1	68.1	2.6	10	180	68.1	2.6	8.61244
16TO-01_66.FIN2	90	0.728	4.24	0.13	0.3088	0.0084	0.66806	1685	24	1733	41	1638	43	1638	43	5.79976
16TO-01_67.FIN2	940	1.65	0.084	0.0031	0.01245	0.00032	0.33136	81.8	2.9	79.8	2	131	69	79.8	2	2.44499
16TO-01_68.FIN2	258	1.841	0.0698	0.0038	0.01077	0.00033	0.11447	68.3	3.6	69	2.1	22	95	69	2.1	1.02489
16TO-01_69.FIN2	1480	1.97	0.1818	0.0054	0.02643	0.00061	0.46771	169.4	4.6	168.2	3.8	174	54	168.2	3.8	0.708383
16TO-01_70.FIN2	161	0.919	0.0785	0.0077	0.01182	0.00044	0.022431	76.2	7.2	75.7	2.8	100	180	75.7	2.8	0.656168
16TO-01_71.FIN2	335	2	0.0774	0.0041	0.01234	0.00034	0.20854	75.5	3.9	79	2.2	31	92	79	2.2	4.63576
16TO-01_72.FIN2	185	1.808	0.0725	0.0048	0.01119	0.00032	0.063424	70.8	4.5	71.7	2	90	120	71.7	2	1.27119
16TO-01_73.FIN2	538	1.223	0.1981	0.0065	0.02813	0.00065	0.24405	183.2	5.5	178.8	4	246	66	178.8	4	2.40175
16TO-01_74.FIN2	93.3	1.306	0.081	0.0087	0.01128	0.0005	0.19002	78.5	8.2	72.3	3.2	250	200	72.3	3.2	7.89809
16TO-01_75.FIN2	264.1	2.9	0.0682	0.0037	0.0107	0.00029	0.20253	66.8	3.5	68.6	1.9	44	93	68.6	1.9	2.69461
16TO-01_76.FIN2	358	4.3	0.0707	0.0036	0.01097	0.0003	0.064633	69.2	3.4	70.3	1.9	65	99	70.3	1.9	1.5896
16TO-01_77.FIN2	289	1.992	0.0685	0.0037	0.01073	0.00035	0.12765	67.2	3.5	68.8	2.3	30	110	68.8	2.3	2.38095
16TO-01_78.FIN2	286.2	1.255	0.1762	0.0065	0.02499	0.00055	0.18648	164.4	5.6	159.1	3.4	227	70	159.1	3.4	3.22384
16TO-01_79.FIN2	340	1.757	0.1666	0.0058	0.0244	0.0006	0.15476	157	5.1	155.4	3.8	180	70	155.4	3.8	1.01911
16TO-01_80.FIN2	116	1.587	0.0736	0.0067	0.01108	0.0004	0.0088916	72.5	6.2	71	2.6	100	160	71	2.6	2.06897
16TO-01_81.FIN2	391	1.35	0.0842	0.0036	0.0132	0.00036	0.20357	81.9	3.4	84.5	2.3	12	78	84.5	2.3	3.1746
16TO-01_82.FIN2	387	1.088	0.0696	0.0034	0.01095	0.00032	0.086251	68.2	3.2	70.2	2	66	94	70.2	2	2.93255
16TO-01_83.FIN2	309	2.19	0.0811	0.0046	0.01217	0.00038	0.089105	79	4.3	78	2.4	130	110	78	2.4	1.26582
16TO-01_84.FIN2	287.8	4.32	0.074	0.004	0.0109	0.0003	0.21918	72.3	3.7	69.9	1.9	140	96	69.9	1.9	3.3195
16TO-01_85.FIN2	277	1.388	0.0776	0.0041	0.01195	0.00036	0.12123	76	3.9	76.6	2.3	66	100	76.6	2.3	0.789474
16TO-01_86.FIN2	272	0.905	0.56	0.016	0.0726	0.0016	0.24375	451.3	11	451.9	9.6	426	58	451.9	9.6	0.132949
16TO-01_87.FIN2	254	2.745	0.0732	0.0044	0.01102	0.00032	0.26945	71.4	4.2	70.7	2.1	65	100	70.7	2.1	0.980392
16TO-01_89.FIN2	384.4	1.846	0.1053	0.0047	0.01625	0.00043	0.33213	101.4	4.3	103.9	2.7	70	81	103.9	2.7	2.46548
16TO-01_90.FIN2	296	2.393	0.2978	0.0084	0.04145	0.00088	0.20659	265.9	6.2	261.8	5.4	274	56	261.8	5.4	1.54193
16TO-01_91.FIN2	54.3	0.982	6.66	0.25	0.3546	0.0099	0.39048	2063	34	1955	47	2135	62	2135	62	8.43091
16TO-01_92.FIN2	257	1.928	0.0683	0.0038	0.01044	0.00031	0.015928	66.9	3.6	66.9	2	90	110	66.9	2	0
16TO-01_93.FIN2	221	0.984	0.0742	0.0047	0.01079	0.00036	0.09282	72.5	4.5	69.2	2.3	250	130	69.2	2.3	4.55172
16TO-01_94.FIN2	393	2.55	0.1051	0.0044	0.01538	0.0004	0.1238	101.6	4	98.4	2.6	168	85	98.4	2.6	3.14961
16TO-01_96.FIN2	886	1.133	0.0697	0.0025	0.01075	0.00035	0.38125	68.3	2.4	68.9	2.3	47	69	68.9	2.3	0.878477
16TO-01_97.FIN2	129.3	2.015	0.0735	0.0051	0.01089	0.00031	0.029683	71.7	4.8	69.8	2	190	140	69.8	2	2.64993
16TO-01_98.FIN2	166.4	0.439	0.0706	0.0049	0.01101	0.00031	0.038609	69.4	4.7	70.6	2	30	120	70.6	2	1.72911
16TO-01_99.FIN2	151.3	1.165	2.175	0.065	0.1999	0.0058	0.60002	1175	21	1176	32	1152	48	1152	48	2.08333
16TO-01_100.FIN2	368	2.225	0.0998	0.0067	0.01488	0.00056	0.12094	97.4	6.4	95.2	3.5	140	150	95.2	3.5	2.25873
16TO-01_101.FIN2	219.1	1.228	0.1218	0.0087	0.0179	0.0007	0.17441	116.3	7.9	114.4	4.4	170	150	114.4	4.4	1.63371
16TO-01_102.FIN2	282	1.954	0.1565	0.006	0.02322	0.00056	0.039945	147.8	5.3	148	3.5	140	81	148	3.5	0.135318
16TO-01_103.FIN2	257.6	1.308	0.0786	0.0053	0.01187	0.00036	0.16064	77.1	4.9	76.1	2.3	100	120	76.1	2.3	1.29702
16TO-01_104.FIN2	283	1.135	0.0835	0.0042	0.01193	0.00034	0.07253	81.2	4	76.4	2.2	210	110	76.4	2.2	5.91133
16TO-01_105.FIN2	707	4.23	0.0712	0.0028	0.01107	0.00026	0.22563	70.3	2.6	71	1.7	48	70	71	1.7	0.995733
16TO-01_106.FIN2	421	1.637	0.0845	0.0044	0.01236	0.00035	0.28814	82.7	4.2	79.2	2.2	173	100	79.2	2.2	4.23216
16TO-01_107.FIN2	118.4	0.788	2.255	0.059	0.2039	0.0051	0.41324	1202	19	1195	27	1201	44	1201	44	0.499584
16TO-01_108.FIN2	342	1.482	0.081	0.0041	0.01149	0.00037	0.28711	78.9	3.8	73.6	2.3	257	93	73.6	2.3	6.71736
16TO-01_109.FIN2	83.6	0.818	0.0878	0.0074	0.01199	0.00047	0.0017675	85.5	6.9	76.8	3	290	160	76.8	3	10.1754
16TO-01_110.FIN2	385	1.201	0.0767	0.0038	0.01183	0.00036	0.32944	75.2	3.5	75.8	2.3	28	88	75.8	2.3	0.797872
16TO-01_112.FIN2	799	1.635	0.182	0.0054	0.02646	0.00064	0.35442	171.1	4.6	168.4	4	182	57	168.4	4	1.57802
16TO-01_113.FIN2	270	2.295	4.191	0.099	0.294	0.0066	0.59003	1673	19	1660	33	1664	33	1664	33	0.240385
16TO-01_114.FIN2	546	1.959	0.0717	0.0039	0.01061	0.00027	0.043822	70.2	3.7	68	1.7	160	110	68	1.7	3.1339
16TO-01_115.FIN2	264.4	2.417	0.0967	0.0052	0.0144	0.00041	0.18797	93.8	4.9	92.2	2.6	147	98	92.2	2.6	1.70576
16TO-01_116.FIN2	73.9	0.904	0.0674	0.0074	0.01034	0.00037	0.079164	65.5	7	66.3	2.4	50	190	66.3	2.4	1.22137
16TO-01_117.FIN2	515	4.38	0.0703	0.0033	0.01087	0.00038	0.22619	68.9	3.1	69.7	2.4	58	93	69.7	2.4	1.1611
16TO-01_118.FIN2	54.5	0.457	0.158	0.014	0.02435	0.00079	0.087152	148	12	155.1	5	110	160	155.1	5	4.7973
16TO-01_120.FIN2	65.2	1.046	1.81	0.053	0.1744	0.0047	0.39037	1049	20	1035	26	1080	56	1080	56	4.16667
16TO-01_121.FIN2	112.6	1.474	0.175	0.015	0.0255	0.0012	0.21234	163	13	162.4	7.6	50	160	162.4	7.6	0.368098
16TO-01_122.FIN2	224.7	1.626	0.0744	0.0053	0.01113	0.00032	0.29065	72.6	5	71.3	2.1	60	120	71.3	2.1	1.79063
16TO-01_123.FIN2	79	0.555	0.179	0.013	0.02623	0.00092	0.18763	168	11	166.9	5.8	150	140	166.9	5.8	0.654762
16TO-01_124.FIN2	332.7	1.719	0.3141	0.0092	0.04031	0.00083	0.37828	277.5	7	254.7	5.2	434	56	254.7	5.2	8.21622
16TO-01_125.FIN2	723	7.07	0.639	0.017	0.0804	0.002	0.33538	500.9	11	498.3	12	506	56	498.3	12	0.519066
16TO-01_126.FIN2	270.3	1.072	0.0726	0.0041	0.01072	0.0003	0.10773	71.4	3.8	68.7	1.9	120	110	68.7	1.9	3.78151
16To_02_1.FIN2	163.9	1.633	0.0941	0.0035	0.0139	0.00027	0.067444	91.2	3.2	89	1.7	188	72	89	1.7	2.41228
16To_02_2.FIN2	305	1.652	4.588	0.12	0.3261	0.0053	0.57966	1746.9	21	1819	26	1677	36	1677	36	8.4675
16To_02_3.FIN2	507.1	2.17	0.103	0.0031	0.01533	0.00028	0.23656	99.5	2.9	98.1	1.8	153	56	98.1	1.8	1.40704
16To_02_4.FIN2	360	0.896	0.1861	0.0052	0.02727	0.00048	0.25283	173.2	4.5	173.4	3	180	54	173.4	3	0.115473
16To_02_5.FIN2	748	2.49	3.271	0.089	0.258	0.0052	0.50306	1474	21	1479	27	1462	45	1462	45	1.16279
16To_02_6.FIN2	78.7	1.886	1.889	0.058	0.1899	0.0041	0.35171	1076	20	1120	22	995	54	995	54	12.5628
16To_02_7.FIN2	545	6.43	0.595	0.023	0.0767	0.0025	0.64442	472	15	477	14	477	64	477	14	1.05932
16To_02_8.FIN2	353	1.99	0.0698	0.0026	0.01037	0.00019	0.17995	68.4	2.5	66.48	1.2	162	74	66.48	1.2	2.80702
16To_02_10.FIN2	412	2.448	0.113	0.0052	0.01639	0.00054	0.37287	108.5	4.7	104.8	3.4	209	84	104.8	3.4	3.41014
16To_02_11.FIN2	72.6	1.643	0.0874	0.0062	0.01242	0.0005	0.35034	84.9	5.8	79.5	3.2	250	140	79.5	3.2	6.36042
16To_02_12.FIN2	326	1.465	0.1009	0.0035	0.01527	0.00034	0.27652	97.5	3.2	97.7	2.2	125	68	97.7	2.2	0.205128
16To_02_13.FIN2	734	2.723	0.0955	0.0028	0.01429	0.00031	0.43665	92.6	2.6	91.5	1.9	116	55	91.5	1.9	1.1879
16To_02_14.FIN2	41.9	1.748	1.849	0.054	0.1791	0.0033	0.23392	1063	19	1062	18	1039	55	1039	55	2.21367
16To_02_15.FIN2	174.8	0.986	0.2479	0.0082	0.03504	0.00061	0.22893	224.6	6.7	222	3.8	221	63	222	3.8	1.15761
16To_02_16.FIN2	153.2	1.22	0.0713	0.0041	0.01056	0.00032	0.26831	69.8	3.9	67.7	2	116	110	67.7	2	3.0086
16To_02_17.FIN2	164	1.491	0.3321	0.011	0.04475	0.0008	0.25374	290.7	8.1	282.2	5	331	64	282.2	5	2.92398
16To_02_19.FIN2	485	1.827	0.1797	0.0063	0.02716	0.00084	0.62224	168	5.5	172.7	5.3	114	63	172.7	5.3	2.79762
16To_02_20.FIN2	613	3.06	0.071	0.0024	0.01092	0.00026	0.4597	69.8	2.2	70	1.7	74	59	70	1.7	0.286533
16To_02_21.FIN2	333	1.026	0.6122	0.016	0.07838	0.0014	0.40183	484.7	10	486.4	8.2	460	51	486.4	8.2	0.350732
16To_02_23.FIN2	136	1.26	0.1153	0.005	0.01581	0.00034	0.078363	110.6	4.6	101.1	2.2	297	95	101.1	2.2	8.58951
16To_02_24.FIN2	84	0.862	0.0853	0.0045	0.01277	0.00033	0.13828	83.3	4.3	81.8	2.1	139	100	81.8	2.1	1.80072
16To_02_25.FIN2	449.3	1.325	0.1145	0.0039	0.0174	0.0004	0.40449	110.2	3.5	111.2	2.6	110	60	111.2	2.6	0.907441
16To_02_26.FIN2	91.2	2.027	0.0955	0.005	0.01422	0.00036	0.22128	92.3	4.6	91	2.3	177	99	91	2.3	1.40845
16To_02_27.FIN2	95.7	1.277	0.588	0.018	0.07625	0.0014	0.42605	469	12	473.6	8.6	446	58	473.6	8.6	0.98081
16To_02_28.FIN2	201.8	1.047	0.2096	0.0076	0.03013	0.00061	0.209	193.3	6.4	191.3	3.8	225	73	191.3	3.8	1.03466
16To_02_29.FIN2	377	1.216	0.1774	0.0053	0.02592	0.00046	0.3484	165.7	4.6	164.9	2.9	174	57	164.9	2.9	0.4828
16To_02_30.FIN2	396	1.384	0.3338	0.0098	0.04634	0.00088	0.43783	292.6	7.3	292.3	5.3	285	56	292.3	5.3	0.102529
16To_02_31.FIN2	214.4	1.169	0.1122	0.0041	0.01659	0.00031	0.039033	107.8	3.8	106	2	149	72	106	2	1.66976
16To_02_32.FIN2	755	3.15	0.0732	0.0024	0.01103	0.00025	0.25218	71.7	2.3	70.7	1.6	115	68	70.7	1.6	1.3947
16To_02_33.FIN2	512	1.562	0.3046	0.009	0.04371	0.00082	0.28809	269.7	7	275.8	5	216	56	275.8	5	2.26177
16To_02_34.FIN2	323	1.808	0.0743	0.0029	0.01113	0.00024	0.22001	72.9	2.7	71.4	1.5	111	73	71.4	1.5	2.05761
16To_02_35.FIN2	475	1.745	0.0683	0.0024	0.01049	0.00022	0.41176	67	2.2	67.3	1.4	94	61	67.3	1.4	0.447761
16To_02_36.FIN2	112.7	1.33	4.948	0.14	0.3434	0.0071	0.56559	1811	24	1902	34	1686	43	1686	43	12.8114
16To_02_37.FIN2	338.4	2.078	0.07	0.0025	0.01099	0.0002	0.064788	68.9	2.4	70.45	1.3	47	68	70.45	1.3	2.24964
16To_02_38.FIN2	312	2.114	0.0745	0.0028	0.01113	0.0002	0.062076	72.9	2.7	71.36	1.3	128	73	71.36	1.3	2.11248
16To_02_39.FIN2	39.5	0.849	0.085	0.0067	0.01267	0.00038	0.0043324	82.8	6.3	81.2	2.4	110	140	81.2	2.4	1.93237
16To_02_40.FIN2	350	1.264	0.1086	0.0044	0.01576	0.00033	0.24366	104.6	4	100.8	2.1	242	82	100.8	2.1	3.63289
16To_02_42.FIN2	383	0.94	0.2007	0.0069	0.02942	0.0008	0.51326	185.9	5.8	186.9	5	185	65	186.9	5	0.537924
16To_02_43.FIN2	245	1.027	0.2533	0.0076	0.03648	0.00065	0.24986	229	6.2	231	4	187	56	231	4	0.873362
16To_02_44.FIN2	421	3.051	0.0693	0.0024	0.01081	0.0002	0.25723	68	2.3	69.3	1.3	46	59	69.3	1.3	1.91176
16To_02_45.FIN2	708	0.994	0.1925	0.0058	0.02785	0.00055	0.32975	178.7	5	177.1	3.5	192	60	177.1	3.5	0.895355
16To_02_46.FIN2	18.15	0.769	3.381	0.11	0.262	0.0056	0.24712	1500	27	1499	29	1502	59	1502	59	0.199734
16To_02_47.FIN2	395	1.655	0.3376	0.01	0.04722	0.0011	0.54724	295.1	7.8	297.4	6.8	260	58	297.4	6.8	0.779397
16To_02_48.FIN2	176	1.064	4.488	0.13	0.3111	0.0061	0.70064	1728	23	1745	30	1700	39	1700	39	2.64706
16To_02_49.FIN2	315.3	1.94	0.1474	0.0047	0.02157	0.00038	0.20026	139.8	4.2	137.6	2.4	145	57	137.6	2.4	1.57368
16To_02_50.FIN2	146.3	1.318	0.0995	0.0044	0.01475	0.00039	0.34853	96.5	4.1	94.4	2.5	167	84	94.4	2.5	2.17617
16To_02_51.FIN2	259	1.116	0.3327	0.0099	0.04655	0.0011	0.47947	291.2	7.5	293.3	6.5	261	56	293.3	6.5	0.721154
16To_02_52.FIN2	34.4	2.52	0.1261	0.01	0.01615	0.00058	0.1715	119.4	9.3	103.2	3.6	400	150	103.2	3.6	13.5678
16To_02_53.FIN2	385	1.871	0.1014	0.0051	0.01565	0.00066	0.32685	98	4.7	100.1	4.2	120	110	100.1	4.2	2.14286	Rim
16To_02_53.FIN2	245.6	1.871	0.1253	0.0057	0.01846	0.00051	0.36189	120.3	5.1	117.9	3.2	119	82	117.9	3.2	1.99501	Core
16To_02_55.FIN2	322	3.724	0.3509	0.012	0.04768	0.0012	0.59018	305	8.7	300.2	7.1	325	62	300.2	7.1	1.57377
16To_02_56.FIN2	233	2.22	0.0907	0.0039	0.01399	0.0003	0.15498	88.6	3.7	89.6	1.9	81	79	89.6	1.9	1.12867
16To_02_57.FIN2	147	2.306	0.1107	0.005	0.01582	0.00043	0.2359	106.7	4.5	101.2	2.7	199	83	101.2	2.7	5.15464
16To_02_58.FIN2	56.1	1.433	0.1002	0.0065	0.01446	0.00044	0.082729	96.4	6	92.5	2.8	150	120	92.5	2.8	4.04564
16To_02_60.FIN2	181.5	1.489	0.0935	0.0036	0.01406	0.00026	0.012836	90.9	3.3	90	1.7	117	75	90	1.7	0.990099
16To_02_61.FIN2	117.7	0.508	0.2303	0.011	0.02801	0.00065	0.39177	212.3	8.6	178.1	4.1	606	92	DISC	DISC	16.1093
16To_02_62.FIN2	332	1.909	0.0702	0.0027	0.01072	0.00023	0.13434	68.8	2.5	68.7	1.5	102	73	68.7	1.5	0.145349
16To_02_63.FIN2	148	1.275	0.0774	0.0061	0.01178	0.00072	0.40862	76.1	5.8	75.5	4.6	90	140	75.5	4.6	0.788436
16To_02_64.FIN2	96.1	0.703	0.1684	0.0067	0.02487	0.00056	0.12143	158.6	5.8	158.3	3.5	204	79	158.3	3.5	0.189155
16To_02_65.FIN2	446	43.6	0.2904	0.0082	0.04079	0.00076	0.4214	259.5	6.5	257.7	4.7	270	55	257.7	4.7	0.693642
16To_02_66.FIN2	386	2.004	0.3198	0.0098	0.04492	0.001	0.58149	281.8	7.7	283.2	6.3	259	56	283.2	6.3	0.496806
16To_02_67.FIN2	71	0.833	0.1778	0.0075	0.02583	0.00062	0.14924	165.7	6.5	164.4	3.9	189	85	164.4	3.9	0.78455
16To_02_68.FIN2	97.7	0.96	0.194	0.0088	0.02844	0.00068	0.25739	180.4	7.7	180.8	4.3	141	88	180.8	4.3	0.221729
16To_02_69.FIN2	273	3.1	0.334	0.011	0.0462	0.0012	0.43192	292.1	8.4	291.1	7.5	314	70	291.1	7.5	0.342349
16To_02_71.FIN2	94.4	1.295	0.0899	0.0051	0.01193	0.00029	0.071744	88.2	4.6	76.4	1.8	370	120	76.4	1.8	13.3787
16To_02_72.FIN2	233	1.46	0.0875	0.0034	0.01311	0.00029	0.24164	85	3.1	84	1.9	122	74	84	1.9	1.17647
16To_02_73.FIN2	120.3	0.4363	4.352	0.11	0.3196	0.0064	0.48817	1703.2	22	1787	31	1592	43	1592	43	12.2487
16To_02_74.FIN2	116.7	1.086	0.0895	0.0044	0.01261	0.00029	0.11485	86.8	4.1	80.8	1.9	191	96	80.8	1.9	6.91244
16To_02_75.FIN2	90.8	1.593	1.84	0.056	0.177	0.0038	0.61339	1060	20	1052	21	1075	47	1075	47	2.13953
16To_02_76.FIN2	671	3.31	0.0808	0.0037	0.0107	0.00036	0.52054	78.8	3.5	68.6	2.3	354	90	68.6	2.3	12.9442
16To_02_77.FIN2	61.1	2.4	0.1131	0.0061	0.01623	0.00041	0.10103	108.4	5.6	103.8	2.6	188	100	103.8	2.6	4.24354
16To_02_78.FIN2	243	3.48	0.0993	0.0034	0.01484	0.0003	0.23746	96	3.2	95	1.9	113	66	95	1.9	1.04167
16To_02_79.FIN2	220.9	1.823	0.0945	0.0038	0.01476	0.00034	0.15228	91.8	3.5	94.5	2.2	32	72	94.5	2.2	2.94118
16To_02_80.FIN2	147.7	2.92	0.0875	0.0038	0.01315	0.00031	0.20925	85.1	3.5	84.2	2	159	83	84.2	2	1.05758
16To_02_81.FIN2	211	1.561	0.0866	0.0046	0.01309	0.00032	0.23863	84.2	4.3	83.8	2	62	92	83.8	2	0.475059
16To_02_82.FIN2	63.1	2.115	2.249	0.066	0.2065	0.0041	0.44788	1195	20	1211	22	1145	49	1145	49	5.76419
16To_02_83.FIN2	324.6	4.726	0.072	0.0026	0.01089	0.00021	0.090755	70.6	2.4	69.82	1.3	90	70	69.82	1.3	1.10482
16To_02_84.FIN2	262	1.83	0.0707	0.0028	0.0108	0.00022	0.239	69.3	2.7	69.2	1.4	79	70	69.2	1.4	0.1443
16To_02_85.FIN2	83.4	1.776	0.1716	0.0083	0.02419	0.00066	0.16917	161.2	7	154.1	4.1	269	98	154.1	4.1	4.40447
16To_02_86.FIN2	56.1	2.276	0.0937	0.0058	0.01517	0.00037	0.095466	90.6	5.4	97	2.4	-40	110	97	2.4	7.06402
16To_02_87.FIN2	371	2.68	0.3293	0.011	0.04573	0.0011	0.34667	288.8	8.4	288.2	6.9	332	79	288.2	6.9	0.207756
16To_02_88.FIN2	341	1.914	0.3077	0.0089	0.0428	0.00082	0.46794	272.5	7	270.1	5.1	270	55	270.1	5.1	0.880734
16To_02_89.FIN2	173.8	2.256	0.0865	0.0036	0.01286	0.0003	0.33754	84.1	3.3	82.4	1.9	114	75	82.4	1.9	2.0214
16To_02_90.FIN2	173.6	2.022	0.1105	0.0048	0.01595	0.00045	0.2525	106.2	4.4	102	2.8	183	87	102	2.8	3.9548
16To_02_91.FIN2	276	1.434	0.1997	0.0097	0.0288	0.0013	0.5687	184.1	8.2	183	7.9	228	85	183	7.9	0.597501
16To_02_92.FIN2	381	4.25	0.0991	0.0039	0.01462	0.00034	0.37253	95.7	3.6	93.5	2.2	177	73	93.5	2.2	2.29885
16To_02_93.FIN2	72.38	0.4981	0.2272	0.0091	0.03145	0.00062	0.060282	207.4	7.5	199.6	3.8	292	83	199.6	3.8	3.76085
16To_02_94.FIN2	803	1.769	0.1348	0.0043	0.02005	0.00046	0.50793	128.3	3.9	127.9	2.9	140	58	127.9	2.9	0.311769
16To_02_95.FIN2	230	1.466	0.3078	0.0088	0.04329	0.00078	0.25411	272.6	6.9	273.1	4.8	281	58	273.1	4.8	0.183419
16To_02_96.FIN2	258	2.345	0.0711	0.0028	0.01081	0.00024	0.27222	69.9	2.6	69.3	1.5	134	71	69.3	1.5	0.858369
16To_02_97.FIN2	90.8	2.13	0.1024	0.0048	0.01538	0.00032	0.14391	99.1	4.4	98.4	2.1	154	87	98.4	2.1	0.706357
16To_02_98.FIN2	104.5	2.84	0.1125	0.0054	0.01714	0.00042	0.17776	108.7	4.9	109.6	2.7	167	92	109.6	2.7	0.827967
16To_02_99.FIN2	88.9	2.207	0.0978	0.0057	0.01468	0.00041	0.27486	94.4	5.2	93.9	2.6	150	110	93.9	2.6	0.529661
16To_02_100.FIN2	248	3.721	0.1057	0.005	0.01649	0.00046	0.32919	101.8	4.6	105.4	2.9	80	84	105.4	2.9	3.53635
16To_02_101.FIN2	101.8	1.46	0.577	0.018	0.07531	0.0014	0.27037	461.9	11	468	8.5	454	62	468	8.5	1.32063
16To_02_102.FIN2	141.6	1.587	0.0701	0.0033	0.01051	0.00023	0.03563	68.7	3.1	67.4	1.5	127	91	67.4	1.5	1.89229
16To_02_103.FIN2	128.9	2.253	0.0975	0.0043	0.01322	0.00029	0.12094	94.6	4	84.6	1.9	350	88	84.6	1.9	10.5708
16To_02_104.FIN2	576	3.3	0.071	0.0024	0.01078	0.00022	0.32905	69.7	2.2	69.1	1.4	106	61	69.1	1.4	0.860832
16To_02_106.FIN2	192	1.272	0.0745	0.0038	0.01069	0.00032	0.23769	73	3.7	68.6	2	242	100	68.6	2	6.0274
16To_02_107.FIN2	433	1.69	0.1225	0.0087	0.0158	0.0012	0.44866	117.1	7.9	101.2	7.3	420	180	101.2	7.3	13.5781
16To_02_108.FIN2	235	2.35	0.33	0.013	0.0432	0.0014	0.52826	289.6	9.9	272.4	8.4	383	74	272.4	8.4	5.93923
16To_02_109.FIN2	181.6	1.667	0.0934	0.0038	0.01423	0.00032	0.17131	90.8	3.5	91.1	2	97	77	91.1	2	0.330396
16To_02_111.FIN2	428	4.77	0.308	0.013	0.0431	0.0015	0.36767	272.4	9.7	271.6	9.1	222	84	271.6	9.1	0.293686	Rim
16To_02_111.FIN2	74.1	1.314	2.02	0.2	0.157	0.013	0.97182	1108	70	935	73	1505	57	DISC	DISC	37.8738	Core
16To_02_112.FIN2	205	0.998	4.364	0.13	0.3093	0.0073	0.71078	1705	25	1740	37	1674	42	1674	42	3.94265
16To_02_113.FIN2	776	2.314	0.0703	0.0022	0.01082	0.0002	0.10177	68.9	2	69.36	1.3	63	57	69.36	1.3	0.667634
16To_02_114.FIN2	151.2	1.628	0.0956	0.0041	0.01411	0.00027	0.23442	92.5	3.8	90.3	1.7	196	83	90.3	1.7	2.37838
16To_02_115.FIN2	436	2.819	0.0671	0.0023	0.01022	0.00022	0.23988	66	2.1	65.6	1.4	112	65	65.6	1.4	0.606061
16To_02_116.FIN2	244	3.01	0.699	0.026	0.0832	0.0025	0.4626	537	16	515	15	601	74	515	15	4.09683
16To_02_117.FIN2	215.4	1.797	4.344	0.11	0.3107	0.0055	0.44522	1701.7	21	1746	27	1657	40	1657	40	5.37115
16To_02_118.FIN2	87.2	1.537	0.2999	0.01	0.04219	0.00078	0.108	265.7	8	266.4	4.8	265	68	266.4	4.8	0.263455
16To_02_119.FIN2	159.5	3.374	0.0933	0.0043	0.01358	0.00034	0.29705	90.9	3.9	87	2.2	200	89	87	2.2	4.29043
16To_02_120.FIN2	88.1	0.965	0.0912	0.0046	0.01291	0.00033	0.099616	88.8	4.2	82.7	2.1	244	110	82.7	2.1	6.86937
16To_02_121.FIN2	125.5	3.229	0.107	0.0043	0.01589	0.00036	0.20754	103.1	4	101.6	2.3	149	76	101.6	2.3	1.4549
16To_02_122.FIN2	492	1.838	0.1013	0.0033	0.0153	0.00031	0.44146	98.1	3.1	97.9	2	117	59	97.9	2	0.203874
16To_02_123.FIN2	119.3	2.077	0.09	0.0045	0.01348	0.0003	0.29975	88	4.1	86.3	1.9	163	87	86.3	1.9	1.93182
16To_02_124.FIN2	647	1.154	0.295	0.0084	0.04203	0.00076	0.48128	262.3	6.6	265.4	4.7	268	53	265.4	4.7	1.18185
16To_02_125.FIN2	302	1.301	0.0707	0.0027	0.01062	0.00022	0.21399	69.3	2.6	68.1	1.4	135	73	68.1	1.4	1.7316
16To_02_126.FIN2	420	2.773	0.0821	0.0029	0.01197	0.00025	0.19669	80.1	2.7	76.7	1.6	209	73	76.7	1.6	4.24469
16To_02_127.FIN2	353.5	2.319	0.0703	0.0025	0.01096	0.00023	0.12949	69	2.4	70.3	1.5	83	69	70.3	1.5	1.88406
16To_02_129.FIN2	549	7.55	3.96	0.12	0.271	0.0077	0.6085	1628	26	1544	39	1725	45	1725	45	10.4928
16To_02_130.FIN2	401	1.873	0.0691	0.0028	0.01059	0.00025	0.20163	67.8	2.7	67.9	1.6	115	73	67.9	1.6	0.147493
16TO-03_1.FIN2	590	1.26	0.0747	0.0029	0.01161	0.00027	0.23259	73	2.7	74.4	1.7	61	71	74.4	1.7	1.91781
16TO-03_2.FIN2	102	1.043	0.0895	0.0071	0.01415	0.00045	0.0268	86.4	6.6	90.5	2.9	70	150	90.5	2.9	4.74537
16TO-03_3.FIN2	42.3	3.46	1.761	0.058	0.1728	0.0045	0.34517	1032	22	1027	25	1017	68	1017	68	0.983284
16TO-03_4.FIN2	282	1.945	0.0838	0.0049	0.01129	0.00037	0.096807	81.4	4.6	72.4	2.4	310	120	72.4	2.4	11.0565
16TO-03_5.FIN2	385	2.29	2.965	0.069	0.2393	0.0055	0.58557	1399	17	1384	28	1397	34	1397	34	0.930565
16TO-03_6.FIN2	155	0.412	0.078	0.01	0.01174	0.00061	0.18509	75.8	9.7	75.2	3.9	140	230	75.2	3.9	0.791557
16TO-03_7.FIN2	714	1.613	0.2803	0.0076	0.03936	0.00089	0.36378	251.4	5.8	248.8	5.5	255	51	248.8	5.5	1.03421
16TO-03_8.FIN2	814	1.731	0.117	0.0034	0.01774	0.00042	0.40283	112.3	3.1	113.3	2.6	85	53	113.3	2.6	0.890472
16TO-03_9.FIN2	660	2.35	0.433	0.017	0.0615	0.0021	0.3954	365	12	384	13	281	84	384	13	5.20548
16TO-03_10.FIN2	321	1.521	0.512	0.015	0.0672	0.0018	0.43925	421.3	10	419.4	11	412	58	419.4	11	0.450985
16TO-03_11.FIN2	160	1.5	0.455	0.015	0.0612	0.0016	0.12638	379.8	11	382.9	9.6	344	73	382.9	9.6	0.816219
16TO-03_12.FIN2	223.3	1.2	0.0692	0.0059	0.01118	0.00043	0.13032	67.7	5.6	71.7	2.7	0	160	71.7	2.7	5.90842
16TO-03_13.FIN2	166	1.63	4.474	0.11	0.3085	0.0077	0.66838	1726	20	1731	38	1713	34	1713	34	1.05079
16TO-03_14.FIN2	405.1	1.95	0.0877	0.0035	0.01372	0.00032	0.19667	85.3	3.2	87.9	2	47	73	87.9	2	3.04807
16TO-03_15.FIN2	164.7	2.826	0.0815	0.0052	0.01226	0.00038	0.038684	79.7	5	78.5	2.4	80	120	78.5	2.4	1.50565
16TO-03_16.FIN2	219.2	0.893	0.1745	0.0071	0.0261	0.00063	0.015651	162.8	6.1	166.1	4	125	82	166.1	4	2.02703
16TO-03_17.FIN2	69.2	1.088	1.649	0.056	0.1656	0.0046	0.29766	986	21	987	26	962	71	962	71	2.59875
16TO-03_18.FIN2	231.5	1.059	0.223	0.011	0.02869	0.00082	0.36105	204.7	8.9	182.3	5.2	450	94	182.3	5.2	10.9428
16TO-03_19.FIN2	178.6	0.868	0.0748	0.0047	0.01131	0.00035	0.16646	73.4	4.5	72.5	2.2	140	120	72.5	2.2	1.22616
16TO-03_20.FIN2	226.9	2.032	0.0869	0.0041	0.01293	0.00036	0.2025	84.4	3.8	82.8	2.3	91	87	82.8	2.3	1.89573
16TO-03_21.FIN2	150	1.26	0.102	0.0067	0.01583	0.00048	0.033391	98.1	6.2	101.2	3.1	60	120	101.2	3.1	3.16004
16TO-03_22.FIN2	244.8	2.23	0.1967	0.0073	0.02831	0.00074	0.25001	182.4	6.1	179.9	4.6	227	72	179.9	4.6	1.37061
16TO-03_23.FIN2	881	1.024	0.193	0.0059	0.02819	0.00067	0.34238	179.7	4.9	179.2	4.2	201	56	179.2	4.2	0.278242
16TO-03_24.FIN2	299.5	1.178	0.0723	0.0051	0.01081	0.00037	0.28747	70.8	4.8	69.3	2.3	130	130	69.3	2.3	2.11864
16TO-03_25.FIN2	348.7	1.599	0.2897	0.011	0.04045	0.0011	0.46739	257.7	8.6	255.6	6.9	224	71	255.6	6.9	0.814901
16TO-03_26.FIN2	492	1.302	0.1585	0.006	0.02356	0.00068	0.32947	149.1	5.3	150.1	4.3	182	74	150.1	4.3	0.670691
16TO-03_27.FIN2	368	1.352	0.1779	0.0062	0.02559	0.00064	0.15602	165.9	5.4	162.9	4	200	68	162.9	4	1.80832
16TO-03_28.FIN2	215	0.98	0.551	0.016	0.07157	0.0016	0.17596	446.1	10	446.1	9.2	451	55	446.1	9.2	0
16TO-03_29.FIN2	116.2	2.092	2.972	0.079	0.2392	0.0056	0.56925	1400	21	1382	29	1421	39	1421	39	2.74455
16TO-03_30.FIN2	179	1.301	0.092	0.0058	0.01417	0.0005	0.22346	89.5	5.3	90.7	3.2	70	110	90.7	3.2	1.34078
16TO-03_31.FIN2	425	2.91	0.0875	0.0046	0.0129	0.00036	0.11714	85.4	4.2	82.6	2.3	154	97	82.6	2.3	3.27869
16TO-03_32.FIN2	45.1	1.026	0.072	0.011	0.01114	0.00053	0.0080204	69	10	71.8	3.4	50	240	71.8	3.4	4.05797
16TO-03_33.FIN2	221	2.197	0.0624	0.0049	0.00942	0.00027	0.29907	61.1	4.6	60.4	1.7	60	130	60.4	1.7	1.14566
16TO-03_34.FIN2	337	1.298	0.1025	0.0068	0.01485	0.00069	0.40615	98.8	6.2	95	4.4	200	120	95	4.4	3.84615
16TO-03_35.FIN2	521	3.41	3.371	0.077	0.2701	0.0063	0.67297	1498	18	1540	32	1638	32	1638	32	5.98291
16TO-03_36.FIN2	303	1.275	0.0946	0.0042	0.01433	0.00037	0.11817	91.7	3.9	91.7	2.3	107	94	91.7	2.3	0
16TO-03_37.FIN2	290.8	1.999	0.0734	0.0033	0.0114	0.00029	0.04361	71.8	3.1	73.1	1.8	77	88	73.1	1.8	1.81058
16TO-03_38.FIN2	83.2	0.4404	3.327	0.092	0.2604	0.0064	0.40938	1487	22	1491	33	1483	47	1483	47	0.539447
16TO-03_39.FIN2	315	1.072	0.0973	0.0064	0.01447	0.00054	0.26024	94.1	5.9	92.6	3.4	180	130	92.6	3.4	1.59405
16TO-03_40.FIN2	250	3.045	0.0757	0.0049	0.01148	0.00037	0.093109	74.6	4.7	73.6	2.4	110	120	73.6	2.4	1.34048
16TO-03_41.FIN2	121.2	1.627	0.257	0.015	0.0346	0.0013	0.30273	233	12	219.5	7.9	360	110	219.5	7.9	5.79399
16TO-03_42.FIN2	119	0.991	4.228	0.094	0.3014	0.0064	0.52638	1678	18	1697	32	1670	31	1670	31	1.61677
16TO-03_43.FIN2	107.5	1.44	3.972	0.11	0.2928	0.0079	0.65178	1630	23	1654	39	1621	38	1621	38	2.03578
16TO-03_44.FIN2	614	3.09	0.0802	0.0029	0.01225	0.0003	0.19014	78.5	2.7	78.5	1.9	55	66	78.5	1.9	0
16TO-03_45.FIN2	151.8	1.193	0.0741	0.0053	0.0111	0.00037	0.060667	72.6	4.9	71.2	2.3	160	140	71.2	2.3	1.92837
16TO-03_46.FIN2	113.5	1.24	0.566	0.034	0.0725	0.0028	0.49248	456	22	451	17	430	110	451	17	1.09649
16TO-03_47.FIN2	681	1.687	0.1162	0.0039	0.01629	0.00037	0.25674	111.5	3.5	104.3	2.4	257	64	104.3	2.4	6.4574
16TO-03_48.FIN2	388	3.75	0.0822	0.0051	0.01297	0.00052	0.22381	80	4.8	83.1	3.3	0	120	83.1	3.3	3.875
16TO-03_49.FIN2	671	2.83	0.0649	0.0025	0.00972	0.00024	0.35364	63.8	2.4	62.4	1.5	98	72	62.4	1.5	2.19436
16TO-03_50.FIN2	195.5	0.605	2.298	0.066	0.2063	0.0054	0.60447	1211	20	1210	29	1222	43	1222	43	0.981997
16TO-03_51.FIN2	1630	2.62	0.0798	0.0035	0.01222	0.00036	0.25584	77.9	3.3	78.3	2.3	108	82	78.3	2.3	0.513479
16TO-03_52.FIN2	268.7	1.032	0.0764	0.0043	0.01163	0.00028	0.10552	75.3	4	74.7	1.8	130	110	74.7	1.8	0.796813
16TO-03_53.FIN2	835	0.5619	0.1827	0.0058	0.02612	0.00066	0.37745	170.2	5	166.2	4.1	179	59	166.2	4.1	2.35018
16TO-03_54.FIN2	101.4	1.13	2.871	0.071	0.239	0.0052	0.42169	1377	19	1381	27	1354	40	1354	40	1.99409
16TO-03_55.FIN2	272	0.986	0.0967	0.0043	0.01425	0.00036	0.15119	93.5	4	91.2	2.3	144	86	91.2	2.3	2.45989
16TO-03_56.FIN2	787	1.725	0.0787	0.003	0.01178	0.00029	0.26137	76.9	2.8	75.5	1.9	138	74	75.5	1.9	1.82055
16TO-03_57.FIN2	419	2.34	0.4461	0.012	0.06028	0.0014	0.31764	374.8	8.8	377.3	8.4	361	56	377.3	8.4	0.667022
16TO-03_59.FIN2	216.3	2.377	0.0985	0.0054	0.01448	0.00042	0.065931	95.1	5	92.7	2.6	160	100	92.7	2.6	2.52366
16TO-03_60.FIN2	205	2.773	0.1007	0.0057	0.01211	0.00036	0.25441	97.1	5.3	77.6	2.3	600	110	DISC	DISC	20.0824
16TO-03_61.FIN2	419	1.69	0.187	0.007	0.02735	0.00093	0.41563	174.3	5.8	173.9	5.8	223	76	173.9	5.8	0.229489
16TO-03_62.FIN2	33	0.994	0.077	0.013	0.0109	0.00063	0.026202	73	12	69.9	4	-10	260	69.9	4	4.24658
16TO-03_63.FIN2	460	1.732	0.2893	0.0085	0.04165	0.00097	0.23301	258.6	6.7	263	6	204	59	263	6	1.70147
16TO-03_64.FIN2	166.1	1.819	0.097	0.006	0.01517	0.00041	0.042586	93.5	5.5	97.1	2.6	50	110	97.1	2.6	3.85027
16TO-03_65.FIN2	627	1.743	0.0782	0.0032	0.01179	0.00034	0.35672	76.3	3	75.6	2.1	145	73	75.6	2.1	0.917431
16TO-03_66.FIN2	779	1.953	0.1104	0.005	0.01619	0.00056	0.32281	106.2	4.5	103.5	3.6	222	92	103.5	3.6	2.54237
16TO-03_67.FIN2	41	1.86	2.348	0.085	0.2094	0.0064	0.41536	1221	26	1224	34	1223	66	1223	66	0.0817661
16TO-03_68.FIN2	358	1.413	0.0944	0.0047	0.01497	0.00047	0.30662	91.8	4.3	95.8	3	36	87	95.8	3	4.3573
16TO-03_69.FIN2	573	0.839	0.1806	0.0053	0.0269	0.00059	0.081927	168.4	4.6	171.1	3.7	135	59	171.1	3.7	1.60333
16TO-03_70.FIN2	87.5	3.96	0.112	0.014	0.01616	0.00089	0.32869	107	13	103.3	5.6	200	230	103.3	5.6	3.45794	Rim
16TO-03_70.FIN2	141.8	2.164	0.174	0.013	0.02623	0.00083	0.33784	162	11	166.9	5.2	160	140	166.9	5.2	3.02469	Core
16TO-03_71.FIN2	76.9	1.037	1.779	0.062	0.1742	0.0057	0.50915	1035	23	1034	31	1047	64	1047	64	1.24164
16TO-03_72.FIN2	135.9	2.831	0.1262	0.0077	0.01911	0.00057	0.21212	120.7	6.8	122	3.6	70	100	122	3.6	1.07705
16TO-03_73.FIN2	102.8	2.052	0.0747	0.0069	0.01164	0.0004	0.0085488	73.3	6.7	74.6	2.6	110	160	74.6	2.6	1.77353
16TO-03_74.FIN2	117.3	1.608	0.0795	0.0064	0.01187	0.00054	0.30005	77.1	6	76	3.4	100	140	76	3.4	1.42672
16TO-03_75.FIN2	140.2	1.784	0.158	0.0086	0.0235	0.00067	0.066253	148.2	7.5	149.7	4.2	130	110	149.7	4.2	1.01215
16TO-03_76.FIN2	259	1.308	0.0876	0.0046	0.01382	0.00034	0.080572	85.9	4.4	88.5	2.2	32	100	88.5	2.2	3.02678
16TO-03_77.FIN2	281	1.495	0.0902	0.006	0.01302	0.00035	0.18514	87.2	5.5	83.4	2.2	190	120	83.4	2.2	4.3578
16TO-03_78.FIN2	167	1.841	0.0793	0.0053	0.01206	0.00043	0.08913	77.7	5.1	77.3	2.7	150	130	77.3	2.7	0.514801
16TO-03_79.FIN2	131.8	0.39	0.164	0.011	0.02395	0.00069	0.18688	156.4	9.3	152.5	4.3	260	110	152.5	4.3	2.49361
16TO-03_80.FIN2	115.9	2.27	0.0914	0.008	0.01315	0.00052	0.42426	88	7.4	84.2	3.3	140	150	84.2	3.3	4.31818
16TO-03_81.FIN2	303	1.72	0.431	0.015	0.0628	0.0022	0.40319	362.4	11	394	13	406	76	394	13	8.71965
16TO-03_82.FIN2	523	1.165	0.0696	0.004	0.01021	0.00045	0.28886	68.1	3.8	65.5	2.9	170	110	65.5	2.9	3.81791
16TO-03_83.FIN2	140	1.63	0.1587	0.0086	0.0233	0.00075	0.11964	149.5	7.6	148.5	4.7	180	110	148.5	4.7	0.668896
16TO-03_84.FIN2	418	1.515	0.0829	0.0064	0.01207	0.00046	0.33394	80.7	6	77.3	2.9	250	150	77.3	2.9	4.21314
16TO-03_85.FIN2	690	4.31	0.1011	0.0048	0.0152	0.00061	0.41716	97.5	4.4	97.2	3.9	151	90	97.2	3.9	0.307692
16TO-03_86.FIN2	223	1.885	0.253	0.011	0.0349	0.0015	0.18143	229.4	8.6	221	9.1	400	120	221	9.1	3.66173
16TO-03_87.FIN2	441	1.94	0.0705	0.0036	0.01115	0.00032	0.11749	69	3.4	71.5	2	32	95	71.5	2	3.62319
16TO-03_88.FIN2	356	2.11	0.1206	0.0076	0.01528	0.00057	0.31621	115.3	6.9	97.7	3.6	450	120	DISC	DISC	15.2645
16TO-03_89.FIN2	775	2.767	0.3116	0.009	0.04407	0.0011	0.258	275.2	6.9	278	6.7	242	65	278	6.7	1.01744
16TO-03_90.FIN2	192.8	1.223	0.2673	0.0097	0.03864	0.0011	0.20148	240.1	7.7	244.4	6.6	209	81	244.4	6.6	1.79092
16TO-03_91.FIN2	428	1.659	3.234	0.094	0.259	0.0073	0.58889	1465	23	1484	37	1438	48	1438	48	3.19889
16TO-03_92.FIN2	286	1.697	0.0661	0.005	0.00973	0.00041	0.11284	64.8	4.7	62.4	2.6	140	150	62.4	2.6	3.7037
16TO-03_93.FIN2	339	1.74	0.0785	0.0041	0.01212	0.00034	0.050963	76.9	3.8	77.6	2.2	67	100	77.6	2.2	0.910273
16TO-03_94.FIN2	110.3	0.551	0.171	0.014	0.02497	0.00085	0.20108	160	12	158.9	5.4	210	150	158.9	5.4	0.6875
16TO-03_95.FIN2	67.9	1.252	0.0813	0.008	0.01213	0.00046	0.056717	79.4	7.6	77.7	2.9	160	170	77.7	2.9	2.14106
16TO-03_96.FIN2	78.5	1.55	0.0996	0.0082	0.01445	0.00057	0.2097	95.5	7.5	92.4	3.6	160	150	92.4	3.6	3.24607
16TO-03_97.FIN2	947	1.425	0.0788	0.0027	0.01195	0.00032	0.29358	77	2.5	76.6	2.1	140	67	76.6	2.1	0.519481
16TO-03_98.FIN2	153	1.549	0.0915	0.007	0.01307	0.00054	0.24366	88.6	6.5	83.7	3.5	300	150	83.7	3.5	5.53047
16TO-03_99.FIN2	231.8	1.272	0.1015	0.008	0.0143	0.00044	0.14471	97.8	7.3	91.5	2.8	260	170	91.5	2.8	6.44172
16TO-03_101.FIN2	398.3	1.297	0.07	0.0033	0.01083	0.0003	0.23565	68.8	3.2	69.5	1.9	81	88	69.5	1.9	1.01744
16TO-03_102.FIN2	185.4	1.426	0.0784	0.0053	0.01166	0.00037	0.13314	77.7	5	74.7	2.4	130	130	74.7	2.4	3.861
16TO-03_103.FIN2	248	2.718	0.0693	0.0036	0.01042	0.00031	0.098322	68.1	3.5	66.8	2	170	100	66.8	2	1.90896
16TO-03_104.FIN2	155.1	3.28	0.0824	0.0056	0.01262	0.00046	0.13635	80	5.3	80.8	2.9	110	120	80.8	2.9	1
16TO-03_105.FIN2	147.4	1.462	0.103	0.0062	0.0139	0.00051	0.0395	99.7	5.8	89	3.3	360	130	89	3.3	10.7322
16TO-03_106.FIN2	166.5	1.726	0.0908	0.0057	0.01473	0.00048	0.1228	87.9	5.3	94.2	3.1	30	120	94.2	3.1	7.16724
16TO-03_107.FIN2	86.6	0.626	0.449	0.02	0.05934	0.0014	0.19691	378	14	371.5	8.2	402	89	371.5	8.2	1.71958
16TO-03_108.FIN2	572	1.569	0.0848	0.0032	0.01336	0.00041	0.23465	82.5	3	85.5	2.6	79	79	85.5	2.6	3.63636
16TO-03_109.FIN2	695	2.63	0.2416	0.01	0.0326	0.0012	0.4005	219.2	8.3	206.6	7.6	350	89	206.6	7.6	5.74818
16TO-03_110.FIN2	452	1.929	0.1812	0.0095	0.02314	0.001	0.54368	170.4	8.7	147.4	6.6	500	110	147.4	6.6	13.4977
16TO-03_111.FIN2	288	1.804	0.0922	0.0047	0.01457	0.0004	0.15977	89.7	4.5	93.2	2.5	84	94	93.2	2.5	3.9019
16TO-03_112.FIN2	216	1.163	0.1137	0.0065	0.01635	0.00056	0.223	108.9	5.9	104.5	3.6	170	110	104.5	3.6	4.0404
16TO-03_113.FIN2	100.7	1.281	2.114	0.061	0.1963	0.0043	0.36609	1155	19	1158	24	1128	45	1128	45	2.65957
16TO-03_114.FIN2	183	2.182	0.0985	0.0065	0.01457	0.00066	0.23309	94.9	6	93.2	4.2	180	130	93.2	4.2	1.79136
16TO-03_115.FIN2	176.8	1.99	1.521	0.052	0.1497	0.0044	0.57121	940	20	903	26	1017	53	1017	53	11.2094
16TO-03_116.FIN2	438	0.852	0.187	0.0072	0.02644	0.00084	0.4568	174.1	6.1	168.2	5.3	276	73	168.2	5.3	3.38886
16TO-03_117.FIN2	132	0.991	0.599	0.037	0.0691	0.0028	0.24897	476	24	431	17	700	130	431	17	9.45378
16TO-03_118.FIN2	117.1	2.38	0.1044	0.0071	0.01519	0.00046	0.046465	101.2	6.4	97.2	2.9	220	130	97.2	2.9	3.95257
16TO-03_119.FIN2	553.2	1.21	0.1824	0.0055	0.02573	0.00055	0.28569	170.4	4.6	163.8	3.5	240	64	163.8	3.5	3.87324
16TO-03_120.FIN2	419	1.436	0.0931	0.0041	0.01416	0.00045	0.1339	90.2	3.8	90.6	2.8	104	91	90.6	2.8	0.443459
16TO-03_121.FIN2	323	1.697	0.0808	0.0047	0.01235	0.00043	0.23938	79	4.5	79.1	2.7	80	110	79.1	2.7	0.126582
16TO-03_122.FIN2	120	1.253	0.1155	0.0086	0.01491	0.00055	0.0073576	110.1	7.8	95.4	3.5	340	160	95.4	3.5	13.3515
16TO-03_123.FIN2	409	1.417	0.1626	0.0059	0.0237	0.00061	0.33737	152.6	5.2	151	3.8	208	71	151	3.8	1.04849
16TO-03_124.FIN2	324	1.22	0.574	0.017	0.0741	0.0018	0.27853	459.6	11	460.9	11	454	56	460.9	11	0.282855
16TO-03_125.FIN2	552	1.274	0.1881	0.0067	0.02781	0.00077	0.32106	175.1	5.7	176.8	4.8	139	70	176.8	4.8	0.970874
16TO-03_126.FIN2	359	1.29	0.0734	0.004	0.0113	0.00039	0.1515	71.7	3.8	72.4	2.5	78	99	72.4	2.5	0.97629
16To_04_1.FIN2	133.1	1.178	0.0968	0.0065	0.01464	0.00044	0.083002	93.6	6	93.7	2.8	127	130	93.7	2.8	0.106838
16To_04_2.FIN2	183	3.7	2.004	0.11	0.1902	0.0054	0.59925	1117	38	1123	30	1122	110	1122	110	0.0891266
16To_04_4.FIN2	255	1.364	0.0928	0.0058	0.01432	0.00041	0.16495	90	5.3	91.7	2.6	89	120	91.7	2.6	1.88889
16To_04_5.FIN2	108.2	1.448	1.801	0.1	0.1783	0.0051	0.57854	1047	37	1057	28	1033	110	1033	110	2.32333
16To_04_6.FIN2	307	1.898	0.1071	0.0083	0.01614	0.00056	0.35971	103.1	7.6	103.2	3.5	140	150	103.2	3.5	0.0969932
16To_04_7.FIN2	156.7	0.956	0.166	0.011	0.0241	0.0007	0.29465	156.1	9.6	153.5	4.4	190	130	153.5	4.4	1.6656
16To_04_8.FIN2	19.53	1.237	4.44	0.27	0.2668	0.0084	0.59182	1720	51	1528	43	1938	100	1938	100	21.1558
16To_04_9.FIN2	197	1.815	2.119	0.12	0.1967	0.0054	0.59773	1157	38	1158	29	1153	100	1153	100	0.433651
16To_04_11.FIN2	234	0.987	1.807	0.1	0.1762	0.0047	0.41955	1046.9	36	1045.8	26	1043	100	1043	100	0.268456
16To_04_13.FIN2	339	1.783	2.875	0.16	0.2365	0.0062	0.44575	1374.5	42	1368.4	33	1377	100	1377	100	0.624546
16To_04_14.FIN2	161	0.968	0.0983	0.0069	0.01424	0.00045	0.17791	95.4	6.3	91.1	2.9	198	140	91.1	2.9	4.50734
16To_04_15.FIN2	147.8	1.454	0.1067	0.0087	0.01409	0.00045	0.37289	102.5	7.9	90.2	2.8	340	160	90.2	2.8	12
16To_04_16.FIN2	132.8	1.353	1.957	0.11	0.18	0.0049	0.51212	1102.8	36	1066.6	27	1153	100	1153	100	7.4935
16To_04_17.FIN2	390.1	2.819	1.144	0.067	0.1257	0.0038	0.6622	773	32	763	22	809	110	763	22	1.29366
16To_04_18.FIN2	174.6	1.301	0.0828	0.0061	0.0128	0.00042	0.014375	80.6	5.7	82	2.7	90	140	82	2.7	1.73697
16To_04_19.FIN2	389	1.262	0.1042	0.0064	0.01535	0.00043	0.20632	100.8	5.8	98.2	2.7	158	120	98.2	2.7	2.57937
16To_04_20.FIN2	53.3	0.41	0.123	0.015	0.01541	0.00075	0.11978	119	14	98.5	4.8	570	240	DISC	DISC	17.2269
16To_04_21.FIN2	1206	12.14	4.551	0.25	0.3062	0.0085	0.68348	1740	47	1721	42	1732	95	1732	95	0.635104
16To_04_22.FIN2	142	2.75	6.414	0.36	0.3713	0.01	0.64154	2033	49	2034	49	2008	94	2008	94	1.29482
16To_04_23.FIN2	472	0.856	0.1748	0.01	0.02621	0.00074	0.27198	163.4	8.7	166.8	4.7	75	110	166.8	4.7	2.08078
16To_04_24.FIN2	317	1.126	0.2842	0.016	0.04036	0.0011	0.25008	254.4	13	255.1	6.8	212	120	255.1	6.8	0.275157
16To_04_25.FIN2	278.9	0.888	0.2907	0.017	0.0407	0.0011	0.27235	258.7	13	257.1	7.1	224	120	257.1	7.1	0.618477
16To_04_26.FIN2	134	2.056	0.257	0.017	0.03576	0.001	0.13592	231.2	14	226.5	6.5	229	130	226.5	6.5	2.03287
16To_04_27.FIN2	627	1.468	0.0829	0.005	0.0121	0.00034	0.22631	80.8	4.7	77.55	2.2	144	120	77.55	2.2	4.02228
16To_04_28.FIN2	66.5	0.485	3.005	0.17	0.2408	0.0067	0.3816	1408	43	1390	35	1387	100	1387	100	0.216294
16To_04_31.FIN2	430	1.163	0.1093	0.0067	0.01509	0.00042	0.29517	105.8	6.2	96.6	2.7	253	130	96.6	2.7	8.69565
16To_04_34.FIN2	243	1.466	0.0972	0.0061	0.01426	0.00042	0.20685	94.1	5.7	91.3	2.7	150	120	91.3	2.7	2.97556
16To_04_35.FIN2	44.1	1.593	1.828	0.11	0.177	0.0054	0.57246	1057	38	1050	30	1050	110	1050	110	0
16To_04_36.FIN2	224	0.952	0.0698	0.0048	0.01124	0.00033	0.067426	68.4	4.5	72.1	2.1	-45	120	72.1	2.1	5.40936
16To_04_38.FIN2	616	1.271	0.0829	0.0053	0.01199	0.00034	0.28214	81.1	4.9	76.83	2.2	161	130	76.83	2.2	5.2651
16To_04_39.FIN2	385	2.059	0.491	0.036	0.0634	0.0028	0.4223	404	25	396	17	422	150	396	17	1.9802	Rim
16To_04_39.FIN2	46.1	2.938	1.554	0.11	0.1587	0.0064	0.53103	951	47	949	36	950	140	950	140	0.105263	Core
16To_04_40.FIN2	474	2.51	0.0937	0.0057	0.0138	0.00043	0.46844	91.1	5.2	88.3	2.7	136	120	88.3	2.7	3.07355
16To_04_41.FIN2	305.8	1.785	0.0862	0.0056	0.01251	0.00036	0.090648	84.7	5.3	80.2	2.3	162	130	80.2	2.3	5.31287
16To_04_42.FIN2	456	2.018	0.0851	0.0052	0.01245	0.00037	0.2033	82.9	4.9	79.8	2.3	118	120	79.8	2.3	3.73945
16To_04_43.FIN2	141.8	1.008	0.1102	0.0078	0.01637	0.00048	0.22829	105.8	7.1	104.7	3.1	132	130	104.7	3.1	1.0397
16To_04_44.FIN2	278	1.018	0.0754	0.0047	0.01159	0.00035	0.16553	73.7	4.4	74.3	2.2	85	120	74.3	2.2	0.814111
16To_04_45.FIN2	188.6	1.039	0.0893	0.0062	0.01332	0.00041	0.12424	86.6	5.8	85.3	2.6	94	130	85.3	2.6	1.50115
16To_04_46.FIN2	168.7	0.826	0.0783	0.0058	0.01139	0.00036	0.028702	76.4	5.4	73	2.3	180	150	73	2.3	4.45026
16To_04_47.FIN2	291.9	1.303	0.1129	0.0071	0.01665	0.00048	0.19761	108.4	6.5	106.5	3.1	152	130	106.5	3.1	1.75277
16To_04_48.FIN2	334.4	1.554	0.0851	0.0054	0.01297	0.00038	0.12091	82.8	5	83.1	2.4	80	120	83.1	2.4	0.362319
16To_04_49.FIN2	100.6	1.434	0.601	0.036	0.0759	0.0022	0.26207	477	22	471.7	13	475	130	471.7	13	1.11111
16To_04_50.FIN2	373	0.507	0.083	0.0055	0.01229	0.0004	0.4292	80.8	5.1	78.7	2.5	129	130	78.7	2.5	2.59901
16To_04_51.FIN2	164.1	1.138	0.0935	0.0073	0.01306	0.00052	0.10242	90.6	6.8	83.6	3.3	290	160	83.6	3.3	7.72627
16To_04_52.FIN2	73.4	1.12	0.0961	0.0088	0.01427	0.0005	0.036665	93.3	8	91.3	3.2	200	160	91.3	3.2	2.14362
16To_04_53.FIN2	234.3	1.461	0.1099	0.0077	0.01479	0.00053	0.38435	105.6	7	94.6	3.4	317	140	94.6	3.4	10.4167
16To_04_56.FIN2	306	1.221	0.0875	0.0053	0.01322	0.00038	0.051642	85.1	5	84.7	2.4	109	120	84.7	2.4	0.470035
16To_04_57.FIN2	58.8	1.78	0.091	0.016	0.01397	0.00097	0.32518	88	15	89.4	6.2	110	340	89.4	6.2	1.59091	Rim
16To_04_57.FIN2	276	5.47	4.15	0.56	0.148	0.016	0.98856	1610	110	878	88	2839	96	DISC	DISC	69.0736	Core
16To_04_58.FIN2	855	15.1	4.416	0.24	0.2973	0.008	0.69973	1714.6	46	1678	40	1752	95	1752	95	4.22374
16To_04_59.FIN2	419	1.134	0.1074	0.0063	0.01614	0.00046	0.19598	103.7	5.7	103.2	2.9	98	120	103.2	2.9	0.48216
16To_04_60.FIN2	237	2.849	0.562	0.032	0.072	0.0022	0.42582	452.1	21	447.9	13	488	120	447.9	13	0.928998
16To_04_61.FIN2	134	1.491	0.0864	0.0066	0.01302	0.00042	0.14812	83.8	6.2	83.4	2.7	100	140	83.4	2.7	0.477327
16To_04_62.FIN2	77.7	0.429	0.235	0.017	0.03267	0.0011	0.04126	214.1	14	207.2	6.8	290	150	207.2	6.8	3.22279
16To_04_63.FIN2	532	1.321	0.4999	0.029	0.06451	0.0018	0.20958	411.2	19	403	11	451	120	403	11	1.99416
16To_04_64.FIN2	153.5	1.175	0.0915	0.0066	0.01346	0.00045	0.16556	89	6	86.2	2.9	118	130	86.2	2.9	3.14607
16To_04_65.FIN2	146.2	1.225	0.0797	0.0064	0.01162	0.00037	0.091144	77.5	6	74.5	2.4	130	140	74.5	2.4	3.87097
16To_04_66.FIN2	481	1.171	0.109	0.0086	0.01387	0.00047	0.25594	103.7	7.4	88.8	3	410	150	88.8	3	14.3684
16To_04_67.FIN2	258.7	1.963	0.3053	0.018	0.04195	0.0012	0.31311	271.3	14	264.9	7.3	320	130	264.9	7.3	2.35901
16To_04_68.FIN2	178.3	1.055	0.0784	0.0054	0.01163	0.00035	0.036017	76.5	5.1	74.5	2.2	157	140	74.5	2.2	2.61438
16To_04_69.FIN2	623	1.517	0.0835	0.0055	0.01174	0.00035	0.25062	81.3	5.1	75.3	2.2	249	130	75.3	2.2	7.38007
16To_04_70.FIN2	284.9	1.717	0.0872	0.0059	0.01311	0.00038	0.18978	84.7	5.5	84	2.4	114	130	84	2.4	0.826446
16To_04_72.FIN2	106	0.928	0.0812	0.0082	0.01177	0.00041	0.11529	78.9	7.6	75.4	2.6	210	180	75.4	2.6	4.43599
16To_04_74.FIN2	455	1.237	0.686	0.04	0.085	0.0026	0.61638	529.5	24	525.7	16	525	120	525.7	16	0.717658
16To_04_75.FIN2	101.6	1.775	2.107	0.12	0.1886	0.0051	0.24948	1151	38	1114.6	28	1192	110	1192	110	6.49329
16To_04_76.FIN2	587	5.48	3.949	0.22	0.2636	0.0082	0.80756	1623	45	1506	42	1737	100	1737	100	13.2988
16To_04_77.FIN2	274.3	0.927	0.3911	0.022	0.05229	0.0014	0.13775	334.8	16	328.5	8.7	336	120	328.5	8.7	1.88172
16To_04_79.FIN2	65.7	2.08	1.746	0.1	0.1666	0.0047	0.35289	1023	38	994	25	1053	110	1053	110	5.60304
16To_04_80.FIN2	254	3.52	4.312	0.24	0.2981	0.0082	0.66431	1694	46	1681	41	1686	96	1686	96	0.29656
16To_04_81.FIN2	204.4	1.245	0.0864	0.0059	0.01273	0.00037	0.12133	84.6	5.4	81.5	2.4	104	130	81.5	2.4	3.6643
16To_04_82.FIN2	239.9	1.141	0.0811	0.0056	0.01174	0.00041	0.3585	79.1	5.2	75.3	2.6	185	140	75.3	2.6	4.80405
16To_04_83.FIN2	70.1	3.8	3.35	0.21	0.2442	0.0083	0.80718	1490	50	1407	43	1597	100	1597	100	11.8973
16To_04_84.FIN2	156.5	1.157	3.245	0.18	0.2553	0.0073	0.64386	1466	43	1467	38	1453	97	1453	97	0.963524
16To_04_85.FIN2	212.7	1.766	0.0614	0.0045	0.00942	0.00029	0.073954	60.3	4.3	60.5	1.8	66	140	60.5	1.8	0.331675
16To_04_86.FIN2	151	2.83	0.0978	0.0096	0.01317	0.00056	0.12075	94.5	8.9	84.3	3.6	380	220	84.3	3.6	10.7937
16To_04_87.FIN2	654	1.851	0.1047	0.0063	0.01508	0.00044	0.13058	101	5.8	96.5	2.8	175	120	96.5	2.8	4.45545
16To_04_88.FIN2	193	1.775	0.0697	0.0052	0.01013	0.00032	0.012229	68.2	4.9	64.9	2.1	160	140	64.9	2.1	4.83871
16To_04_89.FIN2	243	1.675	0.0983	0.0068	0.01458	0.00046	0.049901	95	6.2	93.3	2.9	120	130	93.3	2.9	1.78947
16To_04_90.FIN2	25.4	0.76	3.07	0.21	0.2072	0.0087	0.66095	1420	52	1211	47	1734	110	DISC	DISC	30.1615
16To_04_91.FIN2	309	1.289	2.184	0.12	0.2004	0.0057	0.70553	1174.6	39	1178	31	1130	100	1130	100	4.24779
16To_04_92.FIN2	130.9	2.455	0.0908	0.0068	0.01289	0.00042	0.14563	87.9	6.3	82.6	2.6	210	150	82.6	2.6	6.02958
16To_04_93.FIN2	150.7	1.057	0.611	0.037	0.0773	0.0024	0.48491	483	23	480.7	15	486	130	480.7	15	0.47619
16To_04_94.FIN2	437	11.83	3.021	0.17	0.2414	0.0065	0.6424	1411.2	42	1395	34	1408	99	1408	99	0.923295
16To_04_95.FIN2	252	3.93	4.203	0.23	0.2987	0.0083	0.62246	1673.9	45	1686	42	1652	96	1652	96	2.05811
16To_04_96.FIN2	625	6.69	3.223	0.18	0.2517	0.0071	0.67098	1465	45	1447	37	1468	100	1468	100	1.43052
16To_04_97.FIN2	317	1.933	0.0912	0.0064	0.01357	0.00045	0.32881	88.4	5.9	86.9	2.9	129	130	86.9	2.9	1.69683	Rim
16To_04_97.FIN2	250.8	2.382	0.181	0.016	0.0255	0.0012	0.39037	169	14	162.3	7.8	240	170	162.3	7.8	3.9645	Core
16To_04_98.FIN2	242	0.923	0.0962	0.0078	0.01209	0.00047	0.16067	93.1	7.2	77.4	3	470	190	DISC	DISC	16.8636
16To_04_99.FIN2	443	1.164	0.203	0.013	0.02863	0.00092	0.40007	187.4	11	182	5.7	209	130	182	5.7	2.88154	Rim
16To_04_99.FIN2	100.6	0.686	2.76	0.2	0.2234	0.01	0.79297	1339	54	1299	54	1389	110	1389	110	6.47948	Core
16To_04_100.FIN2	1370	2.124	0.3069	0.019	0.04131	0.0014	0.63508	271.4	14	260.9	8.7	338	130	260.9	8.7	3.86883
16To_04_101.FIN2	8.42	0.809	2.43	0.18	0.21	0.0084	0.16684	1235	54	1230	44	1230	150	1230	150	0
16To_04_102.FIN2	365	2.094	0.2632	0.016	0.03686	0.0012	0.31761	236.8	13	233.3	7.7	241	130	233.3	7.7	1.47804
16To_04_103.FIN2	669	1.345	0.164	0.012	0.02333	0.00076	0.35211	154	10	148.7	4.8	241	140	148.7	4.8	3.44156
16To_04_104.FIN2	222	1.488	3.77	0.23	0.2809	0.01	0.73947	1578	49	1593	51	1542	110	1542	110	3.30739
16To_04_105.FIN2	603	3.008	0.0651	0.004	0.00983	0.00028	0.33457	63.9	3.8	63.03	1.8	82	120	63.03	1.8	1.3615
16To_04_106.FIN2	385	2.547	0.1139	0.0071	0.01666	0.00054	0.33557	109.4	6.5	106.5	3.4	172	130	106.5	3.4	2.65082
16To_04_107.FIN2	254	2.135	0.1165	0.0078	0.01698	0.00056	0.4831	112.1	7	108.5	3.6	175	130	108.5	3.6	3.21142
16To_04_108.FIN2	229.7	0.828	0.272	0.017	0.0383	0.0011	0.14532	243.8	13	242.3	6.7	230	130	242.3	6.7	0.615258
16To_04_109.FIN2	419.6	1.909	0.0874	0.0053	0.0133	0.00038	0.082079	85	5	85.2	2.4	75	120	85.2	2.4	0.235294
16To_04_110.FIN2	250.3	1.134	0.0642	0.0044	0.00983	0.00031	0.045475	63	4.2	63.1	2	110	130	63.1	2	0.15873
16To_04_111.FIN2	317	1.367	0.0904	0.0058	0.01284	0.00039	0.016655	87.7	5.4	82.2	2.5	225	130	82.2	2.5	6.27138
16To_04_112.FIN2	584	1.375	0.0769	0.0046	0.01164	0.00032	0.077197	75.2	4.3	74.6	2.1	80	110	74.6	2.1	0.797872
16To_04_113.FIN2	1238	32.91	4.456	0.25	0.3093	0.0086	0.78825	1721	46	1736	42	1676	95	1676	95	3.57995
16To_04_114.FIN2	118.8	2.141	0.0938	0.0087	0.01195	0.0004	0.052501	90.4	8	76.5	2.6	360	170	DISC	DISC	15.3761
16To_04_115.FIN2	395	0.962	0.0996	0.0065	0.01478	0.00045	0.23662	96.3	6	94.6	2.8	104	130	94.6	2.8	1.76532
16To_04_116.FIN2	742	31	4.288	0.24	0.3005	0.0088	0.67631	1690	46	1692	44	1656	95	1656	95	2.17391
16To_04_117.FIN2	468	1.878	0.1103	0.007	0.01562	0.00044	0.090832	106.1	6.4	99.9	2.8	202	110	99.9	2.8	5.84354
16To_04_118.FIN2	178.6	0.747	0.877	0.05	0.1025	0.0029	0.40745	639	27	629	17	665	120	629	17	1.56495
16To_04_119.FIN2	39.9	0.849	1.576	0.11	0.1593	0.0077	0.62197	961	41	951	42	966	130	966	130	1.5528
16To_04_121.FIN2	118	0.708	12.72	0.78	0.524	0.019	0.92073	2650	60	2708	81	2591	88	2591	88	4.51563
16To_04_122.FIN2	204	1.809	0.0723	0.0058	0.01011	0.00033	0.1511	70.6	5.5	64.8	2.1	220	160	64.8	2.1	8.2153
16To_04_123.FIN2	507	0.712	0.1815	0.011	0.02601	0.00081	0.3864	169.2	9.4	165.5	5.1	195	130	165.5	5.1	2.18676
16To_04_126.FIN2	245	2.227	0.0934	0.0071	0.01223	0.00042	0.31944	90.5	6.6	78.3	2.7	390	160	78.3	2.7	13.4807
16To_04_127.FIN2	497	0.845	0.1759	0.01	0.02587	0.00072	0.32993	164.7	8.5	164.6	4.5	136	120	164.6	4.5	0.0607165
16To_04_128.FIN2	537	0.81	0.0895	0.0055	0.0121	0.00044	0.3121	86.9	5.2	77.5	2.8	313	130	77.5	2.8	10.817
16To_04_129.FIN2	90.4	2.014	2.18	0.12	0.1941	0.0053	0.33573	1174	39	1143	29	1205	110	1205	110	5.14523
16To_04_130.FIN2	237.8	0.989	1.627	0.091	0.1609	0.0046	0.61983	980.1	35	962	25	996	110	996	110	3.41365
16To_04_131.FIN2	669	14.1	0.814	0.046	0.0958	0.0028	0.50182	604.2	26	589.8	16	631	110	589.8	16	2.38332
16To_04_132.FIN2	318	2.007	0.0806	0.0052	0.01242	0.00039	0.29917	79.1	4.9	79.6	2.5	67	120	79.6	2.5	0.632111
16To_04_133.FIN2	959	1.544	0.1053	0.0065	0.01467	0.00057	0.52682	101.9	6.1	93.8	3.6	290	130	93.8	3.6	7.94897
16To_04_134.FIN2	678	1.173	0.0851	0.0052	0.01264	0.00036	0.23489	82.9	4.9	80.9	2.3	106	120	80.9	2.3	2.41255
16To_04_135.FIN2	164	1.81	0.088	0.012	0.01341	0.001	0.47147	85.5	11	85.8	6.4	170	230	85.8	6.4	0.350877	Rim
16To_04_135.FIN2	113.2	2.372	1.945	0.12	0.1698	0.0061	0.65176	1094	40	1010	34	1241	110	1241	110	18.614	Core
16To_04_136.FIN2	894	5.3	3.979	0.22	0.2815	0.0082	0.7077	1629	46	1598	41	1642	97	1642	97	2.67966
16To_04_137.FIN2	182	1.112	0.1139	0.0091	0.01529	0.00074	0.30219	108.9	8.3	97.8	4.7	340	160	97.8	4.7	10.1928
16To_04_138.FIN2	453	2.069	0.0864	0.0052	0.01235	0.00036	0.14469	84	4.9	79.1	2.3	218	120	79.1	2.3	5.83333
16To_04_139.FIN2	590	1.976	0.0785	0.0049	0.01193	0.00035	0.18623	77.1	4.6	76.4	2.2	65	120	76.4	2.2	0.907912
16To_04_140.FIN2	299	1.866	0.083	0.0064	0.01195	0.0006	0.61494	80.8	6	76.6	3.8	199	140	76.6	3.8	5.19802	Rim
16To_04_140.FIN2	361	2.722	2.23	0.22	0.168	0.014	0.97064	1182	70	999	77	1522	100	DISC	DISC	34.3627	Core
16To_05_1.FIN2	63.1	0.458	0.177	0.015	0.02366	0.00082	0.0096576	164	13	151.1	5.1	370	170	151.1	5.1	7.86585
16To_05_2.FIN2	2230	0.972	0.0745	0.0043	0.01072	0.00031	0.47696	72.9	4.1	68.76	2	167	120	68.76	2	5.67901
16To_05_3.FIN2	390.2	3.05	0.1894	0.011	0.027	0.00074	0.25989	176.3	9.3	171.8	4.7	211	120	171.8	4.7	2.55247
16To_05_4.FIN2	282	1.57	0.0911	0.006	0.01261	0.00038	0.17976	88.3	5.6	80.8	2.4	256	130	80.8	2.4	8.49377
16To_05_5.FIN2	1070	1.288	0.1818	0.01	0.02597	0.00074	0.35552	169.4	9	165.2	4.7	188	120	165.2	4.7	2.47934
16To_05_7.FIN2	160.1	0.815	0.0985	0.0069	0.01486	0.00046	0.040125	95.5	6.4	95.1	2.9	115	130	95.1	2.9	0.418848
16To_05_9.FIN2	141.8	0.736	0.116	0.012	0.01625	0.0009	0.023389	110.7	11	103.9	5.7	250	180	103.9	5.7	6.14273
16To_05_10.FIN2	506	1.485	2.11	0.19	0.144	0.011	0.96668	1124	63	861	64	1703	100	DISC	DISC	49.4422
16To_05_11.FIN2	156.7	1.191	0.0792	0.0056	0.01192	0.00038	0.13277	77.5	5.2	76.4	2.4	88	130	76.4	2.4	1.41935
16To_05_12.FIN2	780	0.941	0.1034	0.0061	0.01551	0.00045	0.36374	99.8	5.6	99.2	2.9	77	110	99.2	2.9	0.601202
16To_05_13.FIN2	345	0.644	0.0644	0.0042	0.0097	0.00029	0.28823	63.2	4	62.2	1.9	81	120	62.2	1.9	1.58228
16To_05_14.FIN2	314	1.459	0.0957	0.0066	0.01343	0.00047	0.11155	92.7	6.1	86	3	219	140	86	3	7.22762
16To_05_15.FIN2	676	2.66	0.4602	0.027	0.0604	0.0018	0.54882	383.8	18	378	11	392	120	378	11	1.5112
16To_05_16.FIN2	133.7	1.317	0.0892	0.0075	0.01319	0.00054	0.10059	86.4	7	84.4	3.4	100	160	84.4	3.4	2.31481
16To_05_17.FIN2	171.9	1.57	0.0769	0.0065	0.01095	0.00041	0.24738	75	6.1	70.2	2.6	200	160	70.2	2.6	6.4
16To_05_18.FIN2	396	1.777	0.0914	0.0061	0.01353	0.00045	0.25563	89	5.7	86.7	2.8	114	130	86.7	2.8	2.58427
16To_05_19.FIN2	30.6	0.307	14.77	0.85	0.5146	0.016	0.61349	2795	54	2680	67	2868	87	2868	87	6.55509
16To_05_20.FIN2	439	0.954	0.2055	0.012	0.02944	0.00084	0.16779	190.5	9.9	187	5.2	204	120	187	5.2	1.83727
16To_05_21.FIN2	378	3.159	1.879	0.11	0.1814	0.005	0.70074	1073.5	37	1074	28	1039	110	1039	110	3.36862
16To_05_22.FIN2	307.2	1.746	0.0874	0.0056	0.01287	0.00037	0.24233	84.9	5.3	82.4	2.4	120	120	82.4	2.4	2.94464
16To_05_23.FIN2	161.1	1.77	0.0852	0.0062	0.0127	0.0004	0.075464	83.2	5.9	81.3	2.5	104	130	81.3	2.5	2.28365
16To_05_24.FIN2	51.6	0.282	7.95	0.46	0.3927	0.012	0.68773	2223	53	2133	55	2263	92	2263	92	5.74459
16To_05_25.FIN2	539	1.178	0.298	0.019	0.04153	0.0014	0.6309	264.7	15	262.2	9	266	130	262.2	9	0.944465
16To_05_26.FIN2	564	1.486	0.2724	0.016	0.03827	0.0012	0.48826	244.2	13	242.1	7.3	184	120	242.1	7.3	0.859951
16To_05_27.FIN2	433	2.42	0.5933	0.033	0.07486	0.002	0.34634	472.5	21	465.3	12	452	120	465.3	12	1.52381
16To_05_29.FIN2	282	2.252	0.0894	0.0058	0.01347	0.00039	0.091167	86.8	5.4	86.2	2.5	68	120	86.2	2.5	0.691244
16To_05_30.FIN2	310	5.24	3.86	0.21	0.2778	0.0077	0.62813	1605.7	44	1581	38	1606	99	1606	99	1.55666
16To_05_31.FIN2	382	2.073	0.0844	0.0052	0.01239	0.00036	0.013543	82.2	4.9	79.4	2.3	130	120	79.4	2.3	3.40633
16To_05_32.FIN2	455	3.15	0.0702	0.0043	0.01049	0.00029	0.27302	68.8	4.1	67.27	1.9	86	120	67.27	1.9	2.22384
16To_05_33.FIN2	252.9	0.721	0.0705	0.0047	0.0104	0.00031	0.079102	69.3	4.4	66.7	2	147	130	66.7	2	3.7518
16To_05_34.FIN2	470	2.7	0.0889	0.0054	0.01351	0.00038	0.20877	86.6	5.1	86.5	2.4	61	110	86.5	2.4	0.115473
16To_05_35.FIN2	77	1.257	3.047	0.18	0.2372	0.0089	0.64239	1415	45	1369	46	1483	110	1483	110	7.68712
16To_05_36.FIN2	236	1.862	0.0897	0.0068	0.01357	0.00051	0.058067	86.9	6.3	86.9	3.2	70	140	86.9	3.2	0
16To_05_37.FIN2	387	3.72	2.367	0.13	0.2119	0.006	0.71663	1232.8	40	1239	32	1205	110	1205	110	2.82158
16To_05_38.FIN2	270	1.714	1.172	0.071	0.125	0.0045	0.55173	787	34	759	26	877	120	759	26	3.55781
16To_05_39.FIN2	297.5	1.25	0.0998	0.0062	0.01448	0.00042	0.22532	96.4	5.8	92.7	2.7	182	120	92.7	2.7	3.83817
16To_05_40.FIN2	264	1.71	9.83	0.79	0.354	0.021	0.90369	2417	77	1952	100	2823	91	DISC	DISC	30.8537
16To_05_41.FIN2	171.6	0.571	0.077	0.0065	0.00991	0.00037	0.10368	75.1	6.1	63.6	2.4	440	170	DISC	DISC	15.3129
16To_05_42.FIN2	106.6	0.889	0.0852	0.0074	0.01074	0.00039	0.04482	83.4	6.7	68.8	2.5	460	170	DISC	DISC	17.506
16To_05_43.FIN2	36.4	0.815	1.892	0.12	0.1775	0.0054	0.38506	1074	43	1053	29	1144	130	1144	130	7.95455
16To_05_44.FIN2	1320	1.287	0.3277	0.019	0.04342	0.0013	0.22588	287.7	14	274	8.3	424	120	274	8.3	4.7619
16To_05_45.FIN2	192.8	1.278	0.1963	0.013	0.02912	0.00085	0.26043	181.9	11	185	5.3	168	130	185	5.3	1.70423
16To_05_46.FIN2	102.6	1.178	0.0803	0.0074	0.01154	0.00045	0.16966	78.1	6.9	73.9	2.9	250	180	73.9	2.9	5.37772
16To_05_47.FIN2	143.8	2.1	0.109	0.012	0.0157	0.0012	0.45043	104.4	11	100.3	7.5	280	210	100.3	7.5	3.9272
16To_05_48.FIN2	193.1	1.267	0.0997	0.0088	0.01484	0.00056	0.082786	97.2	7.9	94.9	3.5	180	180	94.9	3.5	2.36626
16To_05_49.FIN2	386	2	0.1049	0.0062	0.01564	0.00045	0.13155	101.2	5.7	100	2.9	164	120	100	2.9	1.18577
16To_05_50.FIN2	234	1.511	0.1005	0.007	0.01487	0.00049	0.3207	97.4	6.6	95.1	3.1	182	130	95.1	3.1	2.3614
16To_05_51.FIN2	256.8	2.8	0.1001	0.0066	0.01493	0.00045	0.19364	97	6.1	95.5	2.9	176	120	95.5	2.9	1.54639
16To_05_52.FIN2	274	1.65	0.0956	0.0066	0.01424	0.00056	0.42584	92.4	6.1	91.1	3.6	216	130	91.1	3.6	1.40693
16To_05_53.FIN2	167	2.442	1.439	0.087	0.1438	0.0049	0.74354	909	37	865	27	1033	110	1033	110	16.2633
16To_05_54.FIN2	85.4	2.039	0.1524	0.011	0.02249	0.00071	0.049272	144.6	9.8	143.4	4.5	200	140	143.4	4.5	0.829876
16To_05_55.FIN2	578	1.008	0.474	0.029	0.0609	0.0019	0.56562	393	20	380.9	11	499	130	380.9	11	3.07888
16To_05_56.FIN2	171.7	0.993	3.107	0.18	0.2564	0.0078	0.67081	1432	44	1471	40	1425	100	1425	100	3.22807
16To_05_57.FIN2	119.2	1.613	0.1204	0.01	0.01618	0.00074	0.19835	114.7	9.1	103.4	4.7	420	160	103.4	4.7	9.85179
16To_05_58.FIN2	396.1	1.085	0.1587	0.0098	0.0231	0.00068	0.40454	149.3	8.6	147.2	4.3	225	120	147.2	4.3	1.40656
16To_05_59.FIN2	365	1.476	0.3044	0.018	0.04285	0.0013	0.43988	270.2	14	270.4	7.9	259	120	270.4	7.9	0.0740192
16To_05_60.FIN2	316	4.09	3.41	0.19	0.264	0.008	0.83873	1506	46	1511	41	1514	100	1514	100	0.198151
16To_05_61.FIN2	375	2.46	0.073	0.0047	0.01077	0.00032	0.3388	71.4	4.4	69.1	2	157	120	69.1	2	3.22129
16To_05_63.FIN2	1590	6.2	0.2726	0.018	0.0391	0.0014	0.66184	246.6	13	247.5	9	247	140	247.5	9	0.364964	Rim
16To_05_63.FIN2	240	1.81	3.563	0.21	0.2706	0.0079	0.6974	1539	47	1543	40	1568	100	1568	100	1.59439	Core
16To_05_64.FIN2	622	6.97	0.445	0.027	0.0604	0.0022	0.58523	373.5	19	379	14	409	120	379	14	1.47256
16To_05_65.FIN2	127.5	1.3	0.2684	0.017	0.03893	0.0011	0.13977	241.4	13	246.2	6.8	214	120	246.2	6.8	1.9884
16To_05_66.FIN2	452	1.041	0.4924	0.028	0.06701	0.002	0.48926	405.9	19	418	12	348	120	418	12	2.98103
16To_05_67.FIN2	411	0.8662	0.0722	0.0045	0.01101	0.00031	0.075704	70.9	4.2	70.59	2	137	120	70.59	2	0.437236
16To_05_68.FIN2	598	2.41	0.3049	0.018	0.04406	0.0013	0.20278	270	14	277.9	8	254	130	277.9	8	2.92593
16To_05_69.FIN2	576	0.901	0.2026	0.012	0.0279	0.00079	0.44397	187.2	10	177.4	5	315	120	177.4	5	5.23504
16To_05_70.FIN2	405.4	1.937	0.1584	0.0099	0.02401	0.00078	0.42726	149.4	8.8	152.9	4.9	145	120	152.9	4.9	2.3427
16To_05_71.FIN2	277	1.284	0.0737	0.0051	0.01091	0.00035	0.33628	72.9	4.8	70	2.2	151	130	70	2.2	3.97805
16To_05_73.FIN2	101.7	0.821	0.0643	0.0055	0.0098	0.00039	0.27437	63	5.2	62.9	2.5	110	150	62.9	2.5	0.15873
16To_05_74.FIN2	863	1.198	0.081	0.0048	0.01214	0.00036	0.3573	79	4.5	77.8	2.3	141	120	77.8	2.3	1.51899
16To_05_75.FIN2	557	0.946	0.1786	0.01	0.02624	0.00071	0.36793	166.7	8.8	167	4.5	184	120	167	4.5	0.179964
16To_05_76.FIN2	414.3	2.23	0.0808	0.0052	0.01209	0.00035	0.27206	78.8	4.9	77.4	2.3	127	120	77.4	2.3	1.77665
16To_05_77.FIN2	287.6	0.5614	11.45	0.64	0.4821	0.014	0.50605	2560	53	2539	59	2603	87	2603	87	2.4587
16To_05_78.FIN2	324	2.3	2.321	0.14	0.2047	0.0071	0.79146	1216	43	1201	38	1265	110	1265	110	5.05929
16To_05_79.FIN2	351.1	1.071	0.0896	0.0055	0.01313	0.00038	0.18413	87.3	5.1	84.1	2.4	200	120	84.1	2.4	3.66552
16To_05_80.FIN2	322.1	59	1.16	0.072	0.1259	0.0038	0.5038	783	33	764	22	877	120	764	22	2.42656
16To_05_81.FIN2	1023	1.924	0.0653	0.0038	0.00993	0.00028	0.20804	64.2	3.6	63.68	1.8	105	120	63.68	1.8	0.809969
16To_05_82.FIN2	19.54	0.831	0.955	0.079	0.1069	0.0042	0.28945	684	43	654	24	770	180	654	24	4.38596
16To_05_83.FIN2	380.3	0.969	0.0646	0.0044	0.01014	0.00029	0.029784	63.5	4.1	65.06	1.9	36	120	65.06	1.9	2.45669
16To_05_84.FIN2	531	0.874	0.2944	0.017	0.03916	0.0011	0.25492	262.2	13	247.6	6.8	391	120	247.6	6.8	5.56827
16To_05_85.FIN2	92.3	1.047	2.594	0.15	0.2174	0.006	0.45474	1298	41	1268	31	1360	100	1360	100	6.76471
16To_05_86.FIN2	383	3.49	0.1023	0.0065	0.01449	0.00045	0.36283	98.8	6	92.7	2.9	280	130	92.7	2.9	6.17409
16To_05_87.FIN2	116.2	0.825	0.2101	0.014	0.03044	0.00092	0.16659	193.6	12	193.2	5.8	166	130	193.2	5.8	0.206612
16To_05_88.FIN2	159.7	0.761	0.537	0.032	0.0679	0.002	0.34721	436	21	423.3	12	554	120	423.3	12	2.91284
16To_05_90.FIN2	72.2	1.281	2.558	0.16	0.2104	0.0071	0.87006	1291	46	1229	38	1427	110	1427	110	13.8753
16To_05_91.FIN2	464	1.868	0.0839	0.0056	0.01252	0.00049	0.36739	81.7	5.3	80.2	3.1	126	130	80.2	3.1	1.83599
16To_05_92.FIN2	258	1.63	0.0905	0.0061	0.01311	0.00043	0.23036	88.1	5.8	84	2.7	210	130	84	2.7	4.6538
16To_05_93.FIN2	486	2.272	0.0836	0.0052	0.01305	0.00044	0.4156	81.4	4.9	83.6	2.8	47	110	83.6	2.8	2.7027
16To_05_94.FIN2	283.8	1.793	0.0855	0.0058	0.01326	0.00048	0.10172	83.5	5.3	84.9	3	83	130	84.9	3	1.67665
16To_05_95.FIN2	119.1	2.435	0.0855	0.008	0.01229	0.00056	0.002088	83	7.5	78.7	3.6	200	190	78.7	3.6	5.18072
16To_05_96.FIN2	1409	1.392	0.0857	0.0055	0.01304	0.0005	0.52432	83.6	5	83.5	3.2	88	120	83.5	3.2	0.119617
16To_05_97.FIN2	142	1.222	3.559	0.21	0.2583	0.0086	0.64292	1537	48	1479	44	1624	100	1624	100	8.92857
16To_05_98.FIN2	292	0.903	0.194	0.012	0.02807	0.0008	0.22248	180.2	9.9	178.4	5	220	120	178.4	5	0.99889
16To_05_99.FIN2	320.6	1.045	0.2598	0.016	0.03587	0.0011	0.14679	234	13	227.2	7	324	140	227.2	7	2.90598
16To_05_100.FIN2	445	3.08	0.0814	0.0054	0.01206	0.00044	0.3252	79.3	5.1	77.3	2.8	172	130	77.3	2.8	2.52207
16To_05_101.FIN2	163.2	1.73	0.086	0.0059	0.01298	0.00042	0.22331	83.6	5.5	83.1	2.7	128	130	83.1	2.7	0.598086
16To_05_103.FIN2	154.6	1.839	2.763	0.16	0.2303	0.0067	0.66864	1344	42	1335	35	1372	100	1372	100	2.69679
16To_05_104.FIN2	172	1.943	4.53	0.33	0.305	0.016	0.66416	1734	61	1720	80	1746	120	1746	120	1.48912
16To_05_105.FIN2	49.8	0.974	0.0795	0.0093	0.01198	0.00057	0.17276	76.8	8.7	76.8	3.6	130	210	76.8	3.6	0
16To_05_106.FIN2	431	0.921	0.1716	0.01	0.02497	0.0008	0.33143	160.6	8.8	159	5	193	120	159	5	0.996264
16To_05_107.FIN2	282.1	1.384	0.2002	0.012	0.02913	0.00086	0.36604	185.4	10	185.1	5.4	220	120	185.1	5.4	0.161812
16To_05_108.FIN2	102.2	0.869	4.258	0.24	0.2941	0.0083	0.42346	1685	45	1661	41	1704	98	1704	98	2.52347
16To_05_109.FIN2	166.3	0.95	0.615	0.037	0.0766	0.0023	0.32973	487	24	475.6	14	540	120	475.6	14	2.34086
16To_05_110.FIN2	47.79	0.648	0.064	0.0081	0.00922	0.0004	0.063541	63.1	7.8	59.1	2.6	210	230	59.1	2.6	6.33914
16To_05_112.FIN2	106.9	8.23	2.43	0.2	0.209	0.013	0.61628	1231	58	1214	69	1269	140	1269	140	4.33412
16To_05_113.FIN2	262	2.8	3.329	0.2	0.2558	0.0087	0.70313	1485	46	1466	45	1522	100	1522	100	3.67937
16To_05_114.FIN2	311.1	0.979	0.0644	0.0043	0.00964	0.00029	0.11417	63.3	4.1	62	1.9	138	130	62	1.9	2.05371
16To_05_115.FIN2	216	0.916	0.2359	0.014	0.03355	0.00097	0.14275	214.5	12	212.7	6.1	219	120	212.7	6.1	0.839161
16To_05_116.FIN2	321	1.227	0.0939	0.0064	0.01394	0.0005	0.2355	91.3	6	89.2	3.2	150	130	89.2	3.2	2.30011
16To_05_117.FIN2	202.3	0.916	0.0771	0.0058	0.01008	0.00038	0.22944	75.2	5.4	64.7	2.4	400	150	64.7	2.4	13.9628
16To_05_118.FIN2	658	0.7016	0.1686	0.0095	0.02509	0.00068	0.1062	158.3	8.2	159.8	4.2	139	120	159.8	4.2	0.947568
16To_05_119.FIN2	56.2	0.923	1.883	0.12	0.1817	0.0073	0.48507	1075	43	1080	41	1045	130	1045	130	3.34928
16To_05_120.FIN2	78.1	99	0.395	0.027	0.0527	0.0018	0.32446	338	20	330.8	11	372	140	330.8	11	2.13018
16To_05_121.FIN2	136.8	1.566	0.0805	0.0058	0.01233	0.00043	0.14735	78.7	5.5	79	2.7	98	130	79	2.7	0.381194
16To_05_122.FIN2	468	1.752	0.0836	0.0054	0.01234	0.00036	0.26975	81.4	5	79	2.3	147	120	79	2.3	2.9484
16To_05_123.FIN2	695	1.962	0.0895	0.0058	0.01274	0.00045	0.36818	86.9	5.4	81.6	2.9	244	130	81.6	2.9	6.09896
16To_05_124.FIN2	353	0.661	0.1769	0.01	0.02668	0.00078	0.25197	165.2	8.9	169.7	4.9	122	120	169.7	4.9	2.72397
16To_05_125.FIN2	151	3.02	0.116	0.015	0.0146	0.0013	0.17561	110	14	93.6	8.4	490	230	93.6	8.4	14.9091	Rim
16To_05_125.FIN2	107.5	1.078	1.939	0.14	0.1528	0.0092	0.82294	1099	46	919	52	1483	120	DISC	DISC	38.031	Core
16To_05_126.FIN2	303	1.131	0.2909	0.017	0.04033	0.0012	0.26226	259.4	13	255.2	7.4	316	120	255.2	7.4	1.61912
16To_05_127.FIN2	224	2.3	0.0833	0.0065	0.01258	0.00044	0.21883	81	6.1	80.6	2.8	70	140	80.6	2.8	0.493827
16To_05_128.FIN2	271	0.98	2.985	0.16	0.246	0.0065	0.60503	1403.5	41	1417.3	34	1392	100	1392	100	1.81753
16To_05_129.FIN2	641	33.5	1.785	0.1	0.1721	0.0048	0.61145	1038	37	1023	26	1084	100	1084	100	5.62731
16To_05_130.FIN2	105	0.775	12.3	0.68	0.5025	0.014	0.58023	2627	51	2623	61	2637	86	2637	86	0.530906
16To_05_131.FIN2	135	1.027	3.132	0.2	0.2594	0.01	0.70742	1444	47	1487	52	1383	110	1383	110	7.51988
16To_05_132.FIN2	50.8	1.419	0.076	0.0084	0.01219	0.00063	0.22761	73.5	7.9	78.1	4	50	190	78.1	4	6.2585
16To_05_133.FIN2	138.3	1.547	0.2946	0.018	0.04181	0.0014	0.39394	261.3	14	263.9	8.7	253	130	263.9	8.7	0.995025
16To_05_134.FIN2	69.3	0.478	0.1612	0.012	0.02403	0.00087	0.20398	150.6	11	153	5.5	160	140	153	5.5	1.59363
16To_05_135.FIN2	647	5.87	0.4684	0.026	0.06243	0.0017	0.48937	391	18	390.3	10	407	120	390.3	10	0.179028
16To_05_136.FIN2	230	3.54	0.23	0.017	0.032	0.0016	0.52166	212	14	202.6	10	353	140	202.6	10	4.43396
16To_05_137.FIN2	196	2.137	2.167	0.12	0.199	0.0055	0.37481	1170	38	1170	29	1191	110	1191	110	1.76322
16To_05_138.FIN2	586	1.989	0.0813	0.005	0.0122	0.00043	0.38739	79.2	4.7	78.2	2.7	160	120	78.2	2.7	1.26263
16To_05_140.FIN2	233.7	0.91	0.0802	0.0055	0.01143	0.00034	0.20255	78.8	5.1	73.3	2.2	250	130	73.3	2.2	6.9797
16To_06_1.FIN2	70.7	0.558	1.305	0.057	0.1417	0.005	0.65492	844	25	853	28	837	75	837	28	1.06635
16To_06_2.FIN2	266	1.462	0.1532	0.007	0.02256	0.00066	0.31349	145.2	6.3	143.8	4.2	137	85	143.8	4.2	0.964187
16To_06_3.FIN2	423	3.735	0.1018	0.0049	0.01497	0.00047	0.31774	98.3	4.5	95.8	3	173	89	95.8	3	2.54323
16To_06_4.FIN2	2530	2.23	0.1129	0.0076	0.01462	0.00075	0.42448	108.5	6.9	93.6	4.8	520	140	93.6	4.8	13.7327
16To_06_5.FIN2	546	0.927	0.0887	0.004	0.01336	0.00038	0.23842	86.4	3.7	85.57	2.4	99	83	85.57	2.4	0.960648
16To_06_6.FIN2	60.2	2.796	0.287	0.017	0.04011	0.0013	0.11014	256	13	253.5	8.2	270	120	253.5	8.2	0.976562
16To_06_7.FIN2	117.2	1.495	0.0996	0.0073	0.01424	0.00047	0.00083444	95.9	6.7	91.1	3	220	140	91.1	3	5.00521
16To_06_8.FIN2	302	1.464	0.0983	0.0048	0.01466	0.00044	0.061378	95.4	4.5	93.8	2.8	161	99	93.8	2.8	1.67715
16To_06_9.FIN2	373.9	2.106	0.1062	0.0053	0.01545	0.0005	0.41662	102.6	4.8	98.8	3.2	218	94	98.8	3.2	3.7037
16To_06_10.FIN2	321.3	2.979	0.0949	0.0044	0.01429	0.00045	0.13348	92.2	4	91.4	2.9	123	90	91.4	2.9	0.867679
16To_06_11.FIN2	81.8	1.323	0.1014	0.0081	0.01477	0.00052	0.25512	98.7	7.3	94.5	3.3	210	140	94.5	3.3	4.25532
16To_06_12.FIN2	607	3.97	0.694	0.026	0.0864	0.0026	0.57761	535.2	16	535	15	546	72	535	15	0.0373692
16To_06_13.FIN2	23.2	1.013	0.396	0.032	0.0521	0.0022	0.12483	332	23	327	13	330	150	327	13	1.50602
16To_06_14.FIN2	660	1.581	0.0766	0.0033	0.01139	0.00033	0.21846	75.1	3.1	73.02	2.1	135	83	73.02	2.1	2.76964
16To_06_15.FIN2	173.3	1.24	0.1038	0.0057	0.01523	0.00048	0.026762	100.4	5.1	97.4	3	169	110	97.4	3	2.98805
16To_06_16.FIN2	156.6	1.275	0.081	0.0047	0.01296	0.00041	0.081766	78.9	4.4	83	2.6	37	110	83	2.6	5.19645
16To_06_17.FIN2	204	2.677	3.94	0.18	0.2577	0.01	0.67584	1624	36	1478	52	1846	68	1846	68	19.935
16To_06_18.FIN2	542	46	0.545	0.044	0.0698	0.0041	0.95917	442	28	435	25	490	89	435	25	1.58371	Rim
16To_06_18.FIN2	60.3	1.546	1.677	0.068	0.1667	0.0049	0.25735	1002	26	993	27	1033	77	1033	77	3.87222	Core
16To_06_19.FIN2	519	1.17	0.0891	0.0041	0.01392	0.00041	0.26379	86.6	3.8	89.1	2.6	47	83	89.1	2.6	2.88684
16To_06_20.FIN2	136.4	1.075	0.0919	0.0075	0.01418	0.00059	0.17647	88.9	7	90.7	3.7	40	140	90.7	3.7	2.02475	Rim
16To_06_20.FIN2	304	0.897	2.33	0.2	0.188	0.014	0.97396	1213	66	1107	80	1430	75	1430	75	22.5874	Core
16To_06_21.FIN2	178.2	2.336	0.0894	0.0054	0.01414	0.00046	0.13924	86.6	5.1	90.5	2.9	14	110	90.5	2.9	4.50346
16To_06_22.FIN2	133.7	1.485	0.0717	0.005	0.01163	0.00041	0.24636	70	4.7	74.5	2.6	-10	120	74.5	2.6	6.42857
16To_06_23.FIN2	337	0.973	0.307	0.013	0.04379	0.0015	0.49751	271.4	9.9	276.2	9	225	81	276.2	9	1.76861
16To_06_24.FIN2	118.3	0.94	0.0764	0.0053	0.01142	0.00042	0.02627	75.2	5	73.2	2.7	180	130	73.2	2.7	2.65957
16To_06_26.FIN2	410	1.451	0.1832	0.0084	0.02728	0.00091	0.43732	170.5	7.2	173.5	5.7	140	86	173.5	5.7	1.75953
16To_06_27.FIN2	215.5	0.825	4.203	0.16	0.2929	0.0095	0.66917	1674	30	1658	48	1724	60	1724	60	3.82831
16To_06_28.FIN2	527	1.234	0.2772	0.011	0.0394	0.0011	0.37911	248.1	8.4	249.1	7	265	78	249.1	7	0.403063
16To_06_29.FIN2	212.4	1.094	0.0929	0.0051	0.01374	0.00042	0.12552	90.3	4.7	87.9	2.7	160	100	87.9	2.7	2.65781
16To_06_30.FIN2	76.9	1.108	1.979	0.079	0.1867	0.0058	0.48119	1107	27	1103	32	1127	71	1127	71	2.12955
16To_06_31.FIN2	33.9	0.787	4.328	0.17	0.3079	0.0095	0.46107	1697	33	1729	47	1693	67	1693	67	2.1264
16To_06_32.FIN2	62.5	1.04	1.798	0.073	0.1756	0.0055	0.47926	1043	26	1042	30	1076	73	1076	73	3.15985
16To_06_33.FIN2	152	1.322	4.162	0.15	0.2999	0.0087	0.66677	1665	30	1690	43	1651	59	1651	59	2.3622
16To_06_34.FIN2	563	3.295	1.612	0.061	0.1651	0.0052	0.56772	974	23	985	29	969	68	969	68	1.65119	Rim
16To_06_34.FIN2	248.5	1.364	2.108	0.086	0.1935	0.0068	0.70625	1149	28	1140	37	1188	66	1188	66	4.0404	Core
16To_06_35.FIN2	68.7	1.053	0.0868	0.0086	0.01138	0.00042	0.079785	83.6	8	72.9	2.7	390	200	72.9	2.7	12.799
16To_06_36.FIN2	801	2.57	0.091	0.0038	0.01386	0.00041	0.1407	88.6	3.5	88.7	2.6	112	81	88.7	2.6	0.112867
16To_06_37.FIN2	319	1.808	0.1347	0.0067	0.01965	0.00064	0.39691	128.4	6	125.4	4.1	160	91	125.4	4.1	2.33645
16To_06_38.FIN2	776	1.467	0.0736	0.0033	0.01146	0.00035	0.41251	72	3.1	73.5	2.3	81	81	73.5	2.3	2.08333
16To_06_39.FIN2	300	0.792	0.1864	0.0098	0.02753	0.00088	0.17287	173.3	8.3	175.1	5.5	157	100	175.1	5.5	1.03866
16To_06_40.FIN2	241.8	1.414	0.0966	0.0052	0.01469	0.00046	0.17215	93.8	4.7	94	2.9	135	100	94	2.9	0.21322
16To_06_41.FIN2	252	1.281	4.008	0.15	0.2921	0.0086	0.72878	1635	30	1651	43	1628	59	1628	59	1.41278
16To_06_42.FIN2	255	2.24	0.2251	0.012	0.0323	0.0015	0.66102	206.7	10	204.9	9.1	188	90	204.9	9.1	0.870827
16To_06_43.FIN2	738	3.06	0.219	0.0098	0.03084	0.0011	0.50975	201.7	8.2	195.8	6.9	268	86	195.8	6.9	2.92514
16To_06_44.FIN2	727	1.599	0.1059	0.0045	0.01547	0.00046	0.26957	102.1	4.1	99	2.9	203	84	99	2.9	3.03624
16To_06_45.FIN2	265	1.087	0.864	0.034	0.1009	0.0031	0.60311	633.9	18	619.3	18	690	75	619.3	18	2.3032
16To_06_46.FIN2	585	0.973	0.1841	0.0076	0.02728	0.00085	0.5774	171.4	6.6	173.5	5.3	141	76	173.5	5.3	1.2252
16To_06_47.FIN2	218	1.17	0.1546	0.0071	0.02363	0.00073	0.23483	145.7	6.2	150.5	4.6	90	85	150.5	4.6	3.29444
16To_06_48.FIN2	514	0.744	0.2055	0.0083	0.03044	0.00094	0.38133	190.5	6.7	193.3	5.9	146	78	193.3	5.9	1.46982
16To_06_49.FIN2	248	2.444	0.0761	0.0041	0.01229	0.00039	0.12404	74.4	3.9	78.8	2.5	-9	94	78.8	2.5	5.91398
16To_06_50.FIN2	51.25	1.615	2.103	0.087	0.1922	0.0058	0.54869	1147	29	1134	32	1178	72	1178	72	3.73514
16To_06_51.FIN2	357	2.392	0.077	0.0041	0.01224	0.00043	0.37471	75.1	3.9	78.4	2.8	20	91	78.4	2.8	4.39414
16To_06_52.FIN2	272.6	1.594	0.1793	0.0077	0.02725	0.00084	0.33415	167.2	6.6	173.3	5.2	75	80	173.3	5.2	3.64833
16To_06_53.FIN2	522	3.342	0.1626	0.0079	0.02432	0.00089	0.67995	153.5	6.9	154.8	5.6	151	85	154.8	5.6	0.846906
16To_06_54.FIN2	362	1.074	0.1283	0.0069	0.0185	0.00066	0.44288	122.4	6.2	118.1	4.2	200	100	118.1	4.2	3.51307
16To_06_55.FIN2	227.9	1.76	0.0792	0.0044	0.01163	0.0004	0.27134	77.3	4.1	74.5	2.5	172	110	74.5	2.5	3.62225	Rim
16To_06_55.FIN2	331	1.256	0.32	0.026	0.0431	0.0025	0.63115	281	20	272	15	330	150	272	15	3.20285	Core
16To_06_56.FIN2	143.2	0.994	0.1223	0.007	0.01522	0.0005	0.12994	117.8	6.1	97.4	3.2	561	120	DISC	DISC	17.3175
16To_06_57.FIN2	244	1.119	0.0985	0.005	0.01489	0.00049	0.27253	95.2	4.6	95.3	3.1	149	99	95.3	3.1	0.105042
16To_06_58.FIN2	62.8	1.12	0.064	0.016	0.00961	0.00093	0.38677	62	15	61.6	5.9	80	380	61.6	5.9	0.645161	Rim
16To_06_58.FIN2	49.2	1.239	1.597	0.092	0.1523	0.0084	0.68599	972	39	918	49	1110	100	1110	100	17.2973	Core
16To_06_59.FIN2	121.8	2.064	1.719	0.066	0.1673	0.005	0.43532	1015	25	997	27	1079	71	1079	71	7.59963
16To_06_60.FIN2	307.2	1.446	0.0767	0.0067	0.01135	0.00041	0.4988	74.8	6.2	72.7	2.6	110	140	72.7	2.6	2.80749
16To_06_61.FIN2	479	1.88	0.608	0.023	0.0803	0.0024	0.62078	481.1	15	497.6	14	434	74	497.6	14	3.42964
16To_06_62.FIN2	717	0.91	0.0633	0.0034	0.00939	0.00032	0.24105	62.2	3.3	60.2	2	173	100	60.2	2	3.21543
16To_06_63.FIN2	188.6	6.22	3.876	0.15	0.2801	0.0093	0.70057	1604	33	1593	47	1643	64	1643	64	3.04321
16To_06_64.FIN2	492	3.1	0.785	0.029	0.0967	0.0028	0.49607	588.3	16	594.9	17	588	72	594.9	17	1.12188
16To_06_65.FIN2	491	1.535	0.2934	0.011	0.04096	0.0012	0.2929	261	8.6	258.8	7.5	292	79	258.8	7.5	0.842912
16To_06_66.FIN2	365	1.279	0.0813	0.0043	0.01307	0.00041	0.30292	79.2	4	83.7	2.6	11	88	83.7	2.6	5.68182
16To_06_67.FIN2	1079	1.248	0.0914	0.0036	0.01391	0.00041	0.089234	88.8	3.4	89.1	2.6	108	78	89.1	2.6	0.337838
16To_06_68.FIN2	222.6	1.081	0.305	0.014	0.04104	0.0014	0.42266	269.6	10	259.2	8.9	367	87	259.2	8.9	3.85757
16To_06_69.FIN2	728	2.54	0.3014	0.012	0.04319	0.0013	0.48875	267.2	9.1	272.5	8	243	77	272.5	8	1.98353
16To_06_70.FIN2	584	2.121	0.2821	0.011	0.04037	0.0012	0.47513	252.4	8.6	255.1	7.7	212	78	255.1	7.7	1.06973
16To_06_71.FIN2	91.2	1.929	0.1784	0.011	0.02255	0.00082	0.22204	165.6	9.5	143.7	5.2	490	120	143.7	5.2	13.2246
16To_06_72.FIN2	317	1.815	3.027	0.12	0.242	0.0075	0.78184	1412	30	1396	39	1454	63	1454	63	3.989
16To_06_73.FIN2	99.7	0.891	1.948	0.076	0.1833	0.0057	0.51079	1096	26	1084	31	1134	72	1134	72	4.40917
16To_06_74.FIN2	74.9	1.223	0.1658	0.011	0.0237	0.00084	0.21929	155.2	9.9	151	5.3	240	120	151	5.3	2.70619
16To_06_75.FIN2	161.7	78.9	0.21	0.015	0.0293	0.0014	0.48103	194	12	186.4	8.7	310	130	186.4	8.7	3.91753
16To_06_76.FIN2	348	2.406	10.64	0.38	0.4645	0.013	0.69158	2495	32	2458	60	2533	54	2533	54	2.96092
16To_06_77.FIN2	288.9	2.439	0.0871	0.006	0.01384	0.00048	0.13177	84.6	5.6	88.6	3.1	10	130	88.6	3.1	4.72813	Rim
16To_06_77.FIN2	470	2.169	0.705	0.028	0.0547	0.0018	0.59949	541.5	17	343.2	11	1494	70	DISC	DISC	36.6205	Core
16To_06_78.FIN2	292	2.271	0.0656	0.0034	0.00961	0.0003	0.27463	64.4	3.2	61.6	1.9	197	100	61.6	1.9	4.34783
16To_06_79.FIN2	159.5	1.123	0.543	0.021	0.07118	0.0021	0.16885	439.8	14	443.2	12	433	82	443.2	12	0.773079
16To_06_80.FIN2	606	1.373	0.0574	0.003	0.00899	0.00032	0.34052	57.1	2.9	57.7	2	38	93	57.7	2	1.05079
16To_06_81.FIN2	672	1.019	0.0549	0.0026	0.00888	0.00028	0.3394	54.2	2.5	57	1.8	0	83	57	1.8	5.16605
16To_06_82.FIN2	999	2.275	0.0684	0.0027	0.01058	0.00031	0.28235	67.2	2.6	67.84	2	59	75	67.84	2	0.952381
16To_06_83.FIN2	583	1.501	0.0864	0.0043	0.01225	0.00044	0.54129	84.3	3.9	78.5	2.8	270	91	78.5	2.8	6.88019
16To_06_84.FIN2	437	1.194	0.2972	0.013	0.04081	0.0014	0.66087	263.6	10	257.8	8.5	340	82	257.8	8.5	2.2003
16To_06_85.FIN2	232.2	153	4.575	0.16	0.3076	0.0091	0.71017	1744	30	1728	45	1785	60	1785	60	3.19328
16To_06_86.FIN2	228	0.639	0.0702	0.0048	0.01134	0.00039	0.10398	68.7	4.6	72.7	2.5	-50	120	72.7	2.5	5.82242
16To_06_87.FIN2	321	1.471	0.084	0.0051	0.01304	0.00046	0.11155	81.8	4.8	83.5	2.9	122	110	83.5	2.9	2.07824
16To_06_88.FIN2	224	1.605	2.938	0.1	0.2421	0.007	0.56431	1390.4	27	1398	36	1408	60	1408	60	0.710227
16To_06_89.FIN2	184.7	1.816	3.161	0.12	0.2521	0.0077	0.67956	1446	29	1454	40	1469	63	1469	63	1.0211
16To_06_90.FIN2	397.4	1.284	0.063	0.0038	0.00951	0.00033	0.047143	61.9	3.7	61	2.1	110	120	61	2.1	1.45396	Rim
16To_06_90.FIN2	988	0.74	1.392	0.058	0.1328	0.0046	0.79241	885	25	804	26	1108	70	804	26	9.15254	Core
16To_06_91.FIN2	111.4	2.164	0.138	0.012	0.01488	0.0009	0.17654	130	11	95.2	5.7	750	190	DISC	DISC	26.7692
16To_06_92.FIN2	144.8	1.874	0.0986	0.0062	0.01495	0.00053	0.013577	95.6	5.8	95.6	3.4	160	120	95.6	3.4	0
16To_06_93.FIN2	303	1.658	0.113	0.0055	0.01668	0.00053	0.20505	108.5	5	106.6	3.3	162	94	106.6	3.3	1.75115
16To_06_94.FIN2	245	1.52	1.642	0.076	0.1387	0.0072	0.70511	986	28	836	41	1321	85	DISC	DISC	15.213
16To_06_95.FIN2	43.01	1.107	2.043	0.089	0.1825	0.0067	0.48793	1125	30	1084	37	1215	79	1215	79	10.7819
16To_06_96.FIN2	226	1.57	0.248	0.016	0.0337	0.0015	0.4752	224	13	213.6	9.3	400	120	213.6	9.3	4.64286
16To_06_97.FIN2	631	2.86	4.035	0.14	0.2875	0.0082	0.77955	1640.8	29	1628	41	1688	57	1688	57	3.5545
16To_06_98.FIN2	130	0.907	4.161	0.16	0.2974	0.0093	0.81762	1665	31	1677	46	1680	61	1680	61	0.178571
16To_06_99.FIN2	258.6	0.999	0.0908	0.0047	0.01426	0.00044	0.1573	88.7	4.4	91.3	2.8	24	96	91.3	2.8	2.93123
16To_06_100.FIN2	247	1.113	0.0757	0.0049	0.01159	0.00038	0.080632	73.8	4.6	74.3	2.5	120	110	74.3	2.5	0.677507
16To_06_101.FIN2	43.8	0.669	1.557	0.068	0.1513	0.005	0.3339	952	27	908	28	1063	86	1063	86	14.5814
16To_06_102.FIN2	1110	2.004	0.297	0.014	0.04029	0.0014	0.58834	263.7	11	254.6	8.4	340	89	254.6	8.4	3.45089	Rim
16To_06_102.FIN2	160.3	3.472	3.88	0.17	0.2809	0.0095	0.64227	1606	35	1595	48	1633	65	1633	65	2.32701	Core
16To_06_103.FIN2	393	1.318	0.0861	0.005	0.01129	0.00044	0.34948	83.7	4.6	72.4	2.8	424	110	72.4	2.8	13.5006
16To_06_104.FIN2	218	1.57	0.0716	0.0056	0.01082	0.00051	0.16823	70	5.3	69.4	3.3	140	140	69.4	3.3	0.857143
16To_06_105.FIN2	282	1.193	0.0696	0.0065	0.01049	0.00073	0.57065	68	6.1	67.2	4.6	180	150	67.2	4.6	1.17647
16To_06_106.FIN2	439	1.184	0.0609	0.0031	0.00923	0.00033	0.30209	60	3	59.2	2.1	151	98	59.2	2.1	1.33333
16To_06_107.FIN2	278.4	0.83	0.529	0.021	0.07106	0.0021	0.41066	430.4	14	442.5	13	372	78	442.5	13	2.81134
16To_06_108.FIN2	454	1.591	0.0854	0.0041	0.0133	0.00041	0.19057	83.1	3.8	85.2	2.6	81	90	85.2	2.6	2.52708
16To_06_109.FIN2	413	1.156	0.0882	0.0044	0.01377	0.00043	0.12683	85.6	4.1	88.1	2.7	74	94	88.1	2.7	2.92056
16To_06_110.FIN2	301	1.79	0.447	0.018	0.05985	0.0018	0.44204	376.2	13	374.7	11	396	82	374.7	11	0.398724
16To_06_111.FIN2	450	1.695	0.844	0.032	0.1018	0.0031	0.63193	621.4	18	624.9	18	632	72	624.9	18	0.563244
16To_06_112.FIN2	449	2.05	0.0861	0.0038	0.0125	0.00038	0.23624	84	3.5	80.1	2.4	205	89	80.1	2.4	4.64286
16To_06_113.FIN2	256	1.965	0.742	0.036	0.0952	0.0039	0.61146	561	21	586	23	504	95	586	23	4.45633
16To_06_114.FIN2	147.9	1.534	0.0854	0.0053	0.01338	0.00044	0.12483	82.9	4.9	85.7	2.8	52	110	85.7	2.8	3.37756
16To_06_115.FIN2	579	3	0.0883	0.0043	0.01353	0.00047	0.43986	85.7	4	86.6	3	106	84	86.6	3	1.05018
16To_06_116.FIN2	456	0.774	0.0598	0.0029	0.00938	0.00028	0.1372	59.1	2.8	60.21	1.8	56	88	60.21	1.8	1.87817
16To_06_117.FIN2	85.6	1.796	2.916	0.12	0.2399	0.0076	0.61063	1383	29	1387	39	1385	68	1385	68	0.144404
16To_06_118.FIN2	158.4	4.51	0.1068	0.0079	0.01534	0.00079	0.34122	102.3	7.2	98.1	5	210	130	98.1	5	4.10557
16To_06_119.FIN2	280	1.173	0.0825	0.0046	0.01214	0.00042	0.1748	80.3	4.3	77.8	2.7	177	100	77.8	2.7	3.11333
16To_06_120.FIN2	1384	0.854	0.0649	0.0028	0.0098	0.00031	0.44473	63.8	2.6	62.8	2	134	79	62.8	2	1.5674
16To_06_121.FIN2	89.4	0.932	3.786	0.15	0.2731	0.0092	0.5614	1591	30	1555	46	1653	65	1653	65	5.92861
16To_06_122.FIN2	159	1.996	0.0858	0.005	0.01283	0.00044	0.25189	83.3	4.7	82.2	2.8	159	110	82.2	2.8	1.32053
16To_06_123.FIN2	229	7.36	1.41	0.12	0.1262	0.01	0.79453	904	48	764	57	1298	100	DISC	DISC	15.4867	Rim
16To_06_123.FIN2	144.4	2.16	5.58	0.25	0.3402	0.013	0.86827	1917	38	1885	63	1987	60	1987	60	5.13337	Core
16To_06_124.FIN2	224.3	2.301	0.0927	0.0056	0.01318	0.00044	0.21591	89.8	5.2	84.4	2.8	220	120	84.4	2.8	6.01336
16To_06_125.FIN2	573	1.742	0.0925	0.0043	0.0141	0.00044	0.31065	89.7	4	90.3	2.8	85	85	90.3	2.8	0.668896
16To_06_126.FIN2	566	0.945	0.0708	0.0032	0.01098	0.00033	0.25618	69.4	3	70.37	2.1	57	82	70.37	2.1	1.39769
16To_06_127.FIN2	181.2	1.426	1.581	0.058	0.1603	0.0046	0.33701	961.6	23	958.3	26	966	68	966	68	0.797101
16To_06_128.FIN2	137.3	0.732	0.1615	0.0075	0.02344	0.00071	0.067934	152.1	6.4	149.4	4.5	192	93	149.4	4.5	1.77515
16To_06_129.FIN2	195.4	0.8339	0.1027	0.0057	0.01575	0.0005	0.25933	98.9	5.3	100.7	3.2	71	97	100.7	3.2	1.82002
16To_06_130.FIN2	306	1.266	0.0992	0.0048	0.01507	0.00047	0.27	96.2	4.4	96.4	3	81	89	96.4	3	0.2079
16TO-07_2.FIN2	242.9	2.741	0.1011	0.0051	0.01503	0.00042	0.24319	97.4	4.7	96.1	2.7	139	95	96.1	2.7	1.3347
16TO-07_3.FIN2	453	1.7	0.644	0.028	0.0764	0.0032	0.57339	503	17	474	19	547	84	474	19	5.76541	Rim
16TO-07_3.FIN2	270	1.321	1.633	0.062	0.1456	0.0044	0.50627	990	21	876	24	1217	52	1217	52	28.0197	Core
16TO-07_4.FIN2	139.7	2.375	3.172	0.079	0.2606	0.0061	0.55269	1450	19	1491	31	1391	41	1391	41	7.18907
16TO-07_5.FIN2	79.5	1.147	13.68	0.32	0.5237	0.012	0.60378	2724	22	2712	51	2733	32	2733	32	0.768386
16TO-07_6.FIN2	134	1.482	4.22	0.13	0.2978	0.0087	0.4061	1678	25	1679	43	1621	52	1621	52	3.57804
16TO-07_7.FIN2	180.5	1.264	0.1189	0.0073	0.01725	0.00051	0.16341	113.8	6.6	110.2	3.3	220	130	110.2	3.3	3.16344
16TO-07_8.FIN2	62	1.091	0.091	0.014	0.01291	0.00065	0.10093	89	13	82.7	4.1	300	290	82.7	4.1	7.07865
16TO-07_9.FIN2	187.9	0.725	0.0933	0.005	0.0138	0.00038	0.17985	90.2	4.7	88.4	2.4	130	100	88.4	2.4	1.99557
16TO-07_10.FIN2	196	1.038	0.0881	0.0058	0.01163	0.00038	0.044878	85.5	5.4	74.5	2.4	390	140	74.5	2.4	12.8655
16TO-07_11.FIN2	15.69	12.3	2.75	0.13	0.2336	0.0083	0.54204	1351	36	1350	44	1375	78	1375	78	1.81818
16TO-07_12.FIN2	98.1	0.78	3.116	0.08	0.251	0.0062	0.52288	1438	20	1443	32	1462	45	1462	45	1.29959
16TO-07_13.FIN2	458.7	0.936	0.171	0.0058	0.02519	0.00059	0.44878	160.5	5.1	160.4	3.7	172	63	160.4	3.7	0.0623053
16TO-07_14.FIN2	414	2.205	0.0813	0.0048	0.01172	0.00051	0.40854	79.1	4.5	75.1	3.2	130	110	75.1	3.2	5.05689
16TO-07_15.FIN2	460	3.611	2.481	0.057	0.2132	0.0054	0.61993	1265	17	1245	29	1323	40	1323	40	5.89569
16TO-07_17.FIN2	116.1	1.999	0.112	0.011	0.01723	0.00075	0.097277	108.4	9.4	110.1	4.7	170	180	110.1	4.7	1.56827
16TO-07_18.FIN2	777	1.568	0.1857	0.0053	0.02715	0.00068	0.4525	172.7	4.6	172.7	4.3	184	57	172.7	4.3	0
16TO-07_19.FIN2	364.2	1.481	0.1213	0.0051	0.0179	0.00044	0.35026	116	4.6	114.6	2.7	189	83	114.6	2.7	1.2069
16TO-07_21.FIN2	125	0.647	0.079	0.0062	0.01217	0.00037	0.068834	78.3	5.7	78	2.4	120	140	78	2.4	0.383142
16TO-07_22.FIN2	367	1.848	0.1034	0.0053	0.01377	0.00043	0.3542	99.6	4.9	88.1	2.7	361	100	88.1	2.7	11.5462
16TO-07_23.FIN2	262	1.765	3.345	0.1	0.2624	0.0087	0.61453	1498	24	1498	44	1471	50	1471	50	1.83549
16TO-07_24.FIN2	331.2	2.002	0.0991	0.0057	0.01497	0.00049	0.31454	95.7	5.3	95.8	3.1	112	100	95.8	3.1	0.104493
16TO-07_25.FIN2	506	1.59	0.0887	0.0043	0.01286	0.00045	0.336	86.2	4	82.3	2.9	193	89	82.3	2.9	4.52436
16TO-07_26.FIN2	220	0.669	0.166	0.007	0.02428	0.00064	0.31084	156	6	154.7	4	135	78	154.7	4	0.833333
16TO-07_27.FIN2	606	1.263	0.3038	0.009	0.03955	0.0011	0.4671	269.5	6.9	250	6.7	422	63	250	6.7	7.23562
16TO-07_28.FIN2	135.2	4.06	1.629	0.045	0.1679	0.0043	0.52354	982	17	999	24	920	52	920	52	8.58696
16TO-07_29.FIN2	138.3	0.959	3.098	0.082	0.2496	0.0067	0.57677	1429	20	1434	35	1413	48	1413	48	1.4862
16TO-07_30.FIN2	40.7	0.604	0.173	0.014	0.02604	0.00073	0.11235	161	12	165.7	4.6	120	150	165.7	4.6	2.91925
16TO-07_31.FIN2	229.1	0.476	0.227	0.0086	0.03099	0.0009	0.49099	207.9	7.2	196.7	5.6	309	74	196.7	5.6	5.38721
16TO-07_32.FIN2	425	1.605	0.0971	0.0037	0.01449	0.00033	0.0019329	94	3.4	92.7	2.1	129	82	92.7	2.1	1.38298
16TO-07_33.FIN2	812	3.353	0.1772	0.0052	0.02592	0.00069	0.37262	165.4	4.5	164.9	4.3	184	61	164.9	4.3	0.302297
16TO-07_35.FIN2	298.4	2.213	0.0723	0.0036	0.01103	0.00035	0.28241	70.7	3.4	70.7	2.2	71	91	70.7	2.2	0
16TO-07_37.FIN2	327	1.929	0.166	0.0055	0.02437	0.0006	0.29172	155.7	4.8	155.2	3.8	177	67	155.2	3.8	0.32113
16TO-07_38.FIN2	162.5	1.822	0.1009	0.0058	0.01483	0.0006	0.012106	97.8	5.4	94.9	3.8	190	100	94.9	3.8	2.96524
16TO-07_39.FIN2	349	1.82	0.0867	0.0042	0.01245	0.00043	0.49113	84.2	3.9	79.7	2.7	145	83	79.7	2.7	5.34442
16TO-07_41.FIN2	628	1.299	0.1604	0.0048	0.02316	0.00054	0.345	150.9	4.2	147.6	3.4	249	62	147.6	3.4	2.18688
16TO-07_42.FIN2	221	2.422	0.0843	0.005	0.01171	0.00038	0.29333	83	4.7	75	2.4	300	120	75	2.4	9.63855
16TO-07_43.FIN2	178.7	3.41	0.393	0.014	0.0541	0.0014	0.46172	335.5	10	339.8	8.5	289	66	339.8	8.5	1.28167
16TO-07_44.FIN2	251	1.196	3.155	0.07	0.2521	0.0057	0.71829	1444	17	1448	29	1431	32	1431	32	1.18798
16TO-07_45.FIN2	534	1.364	4.12	0.12	0.294	0.0095	0.44394	1657	22	1659	47	1648	55	1648	55	0.667476
16TO-07_46.FIN2	417	1.972	0.0793	0.0037	0.01176	0.0004	0.4133	77.4	3.4	75.4	2.5	168	86	75.4	2.5	2.58398
16TO-07_47.FIN2	115.7	0.777	0.172	0.012	0.02492	0.001	0.024033	161	10	158.6	6.5	170	150	158.6	6.5	1.49068
16TO-07_48.FIN2	387	1.285	0.082	0.0039	0.01226	0.00037	0.2099	79.8	3.6	78.5	2.4	170	100	78.5	2.4	1.62907
16TO-07_49.FIN2	624.2	2.451	0.623	0.013	0.0775	0.0016	0.41368	492	8.3	481.1	9.8	540	45	481.1	9.8	2.21545
16TO-07_50.FIN2	258	2.256	0.636	0.025	0.0799	0.0035	0.59114	497	16	494	21	520	79	494	21	0.603622
16TO-07_51.FIN2	1047	1.037	0.0609	0.0023	0.00926	0.00025	0.40888	60.2	2.2	59.4	1.6	74	69	59.4	1.6	1.3289
16TO-07_53.FIN2	676	6.5	4.329	0.11	0.3042	0.0081	0.75956	1699	22	1710	40	1653	37	1653	37	3.44828
16TO-07_54.FIN2	449	1.872	3.81	0.16	0.267	0.013	0.46153	1584	35	1528	69	1733	81	1733	81	11.8292
16TO-07_55.FIN2	852	0.872	0.0949	0.0064	0.01346	0.00082	0.613	91.9	5.9	86.2	5.2	270	130	86.2	5.2	6.20239
16TO-07_56.FIN2	338	1.583	0.0732	0.0036	0.01121	0.0004	0.28569	72	3.4	71.9	2.6	110	97	71.9	2.6	0.138889
16TO-07_57.FIN2	187	2.56	4.02	0.12	0.2875	0.009	0.85147	1633	27	1629	45	1598	41	1598	41	1.93992
16TO-07_58.FIN2	213	1.37	0.0833	0.0059	0.012	0.00052	0.39986	80.8	5.6	76.9	3.3	190	130	76.9	3.3	4.82673
16TO-07_59.FIN2	153.7	3.939	12.81	0.26	0.5281	0.011	0.61048	2663	19	2734	45	2620	26	2620	26	4.35115
16TO-07_60.FIN2	486.9	1.404	0.3136	0.0073	0.04343	0.00091	0.43926	277.6	5.6	274	5.6	284	44	274	5.6	1.29683
16TO-07_61.FIN2	219	0.956	0.0855	0.0067	0.01192	0.00055	0.20864	83.1	6.3	76.4	3.5	340	160	76.4	3.5	8.06258
16TO-07_62.FIN2	91.4	1.258	6.96	0.21	0.3922	0.011	0.55676	2105	27	2134	51	2058	50	2058	50	3.69291
16TO-07_63.FIN2	430	3.51	0.097	0.005	0.01447	0.00063	0.45834	94.2	4.7	92.6	4	163	96	92.6	4	1.69851
16TO-07_64.FIN2	273.4	2.728	0.204	0.008	0.03003	0.00083	0.3387	188.1	6.7	191.2	5.3	142	75	191.2	5.3	1.64806
16TO-07_65.FIN2	525	8.05	3.909	0.087	0.2595	0.0063	0.71593	1616	18	1486	32	1793	31	1793	31	17.1221
16TO-07_66.FIN2	196.4	1.097	0.562	0.016	0.0726	0.0018	0.27607	454.4	11	451.5	11	445	61	451.5	11	0.638204
16TO-07_67.FIN2	607	1.584	0.3125	0.0083	0.04198	0.001	0.45442	275.7	6.5	265	6.3	362	52	265	6.3	3.88103
16TO-07_68.FIN2	476	1.392	0.2984	0.0093	0.0419	0.0013	0.55889	264.5	7.3	264.5	7.8	270	57	264.5	7.8	0
16TO-07_69.FIN2	635	3.2	0.0824	0.004	0.01237	0.00052	0.34408	80.6	3.7	79.3	3.3	120	100	79.3	3.3	1.6129
16TO-07_70.FIN2	449	3.14	2.683	0.092	0.2232	0.008	0.57483	1323	26	1297	42	1358	58	1358	58	4.4919
16TO-07_71.FIN2	142.5	0.955	0.218	0.014	0.02442	0.00097	0.2726	201	11	155.5	6.1	810	120	DISC	DISC	22.6368
16TO-07_72.FIN2	1160	2.79	0.0932	0.0039	0.01307	0.00039	0.14772	90.3	3.7	83.7	2.5	232	92	83.7	2.5	7.30897
16TO-07_73.FIN2	101.4	0.78	0.199	0.013	0.0245	0.0013	0.42547	186	12	155.8	8.3	530	130	DISC	DISC	16.2366
16TO-07_74.FIN2	226.2	1.627	0.495	0.018	0.0647	0.0023	0.4855	409	12	404	14	395	83	404	14	1.22249
16TO-07_75.FIN2	115.6	0.728	2.838	0.081	0.2281	0.0062	0.61616	1366	20	1323	33	1412	47	1412	47	6.30312
16TO-07_76.FIN2	68.5	1.322	0.0712	0.0088	0.01067	0.00054	0.19296	68.8	8.3	68.4	3.4	110	200	68.4	3.4	0.581395
16TO-07_77.FIN2	634	1.325	0.0935	0.0035	0.0144	0.00044	0.30221	90.6	3.3	92.4	2.8	34	74	92.4	2.8	1.98675
16TO-07_78.FIN2	148.4	1.1	0.263	0.014	0.0376	0.0014	0.36636	235	11	237.6	8.5	218	95	237.6	8.5	1.10638
16TO-07_79.FIN2	1434	1.011	0.2283	0.0084	0.02903	0.00095	0.54878	209.3	6.8	184.4	6	532	78	184.4	6	11.8968
16TO-07_80.FIN2	783	1.97	0.1057	0.0043	0.01536	0.0005	0.31749	101.9	3.9	98.2	3.2	150	86	98.2	3.2	3.63101
16TO-07_81.FIN2	219	1.63	3.95	0.12	0.2873	0.0091	0.71757	1627	26	1625	45	1645	45	1645	45	1.21581
16TO-07_82.FIN2	113.5	2.138	0.508	0.025	0.02118	0.00061	0.26191	417	17	135.1	3.8	2584	80	DISC	DISC	67.6019
16TO-07_83.FIN2	138.4	0.964	0.1038	0.0063	0.01512	0.00062	0.055448	99.8	5.8	96.7	3.9	150	130	96.7	3.9	3.10621
16TO-07_84.FIN2	247	4.63	4.074	0.11	0.2902	0.009	0.62245	1646	21	1642	44	1660	48	1660	48	1.08434
16TO-07_85.FIN2	40.4	3.401	2.166	0.063	0.199	0.0048	0.27244	1167	21	1171	26	1129	61	1129	61	3.72011
16TO-07_86.FIN2	84.6	0.842	0.106	0.018	0.01271	0.00096	0.29815	101	16	81.4	6.1	640	330	DISC	DISC	19.4059
16TO-07_87.FIN2	87.2	1.188	5.15	0.16	0.3312	0.01	0.65171	1847	26	1845	49	1881	45	1881	45	1.91388
16TO-07_88.FIN2	283.9	2.322	0.1102	0.0053	0.01583	0.00058	0.25224	105.8	4.9	101.2	3.7	190	100	101.2	3.7	4.34783
16TO-07_89.FIN2	133.9	1.488	0.0666	0.0047	0.01071	0.00039	0.15716	65.2	4.5	68.7	2.5	-50	120	68.7	2.5	5.3681
16TO-07_90.FIN2	385	1.64	0.0709	0.0048	0.01035	0.00046	0.46428	70.6	4.8	66.4	2.9	170	110	66.4	2.9	5.94901
16TO-07_91.FIN2	127.9	1.81	0.0903	0.0062	0.01245	0.00056	0.17065	87.3	5.8	79.8	3.6	300	140	79.8	3.6	8.59107
16TO-07_92.FIN2	184.3	1.159	0.157	0.014	0.01862	0.00077	0.14191	147	13	118.9	4.9	660	200	DISC	DISC	19.1156
16TO-07_93.FIN2	170.8	1.189	0.086	0.0055	0.01254	0.00041	0.20637	84.8	5.2	80.3	2.6	150	120	80.3	2.6	5.3066
16TO-07_94.FIN2	644	2.53	0.0801	0.0035	0.01175	0.00039	0.43711	78.1	3.3	75.3	2.5	177	83	75.3	2.5	3.58515
16TO-07_96.FIN2	100	1.429	0.0902	0.0075	0.01166	0.00046	0.31287	87.6	7	74.7	3	430	140	74.7	3	14.726
16TO-07_97.FIN2	160.2	2.62	4.15	0.12	0.2944	0.0099	0.58873	1657	24	1659	49	1663	52	1663	52	0.240529
16TO-07_98.FIN2	332	1.577	0.0824	0.0042	0.0125	0.00045	0.28461	80.7	3.8	80	2.8	130	100	80	2.8	0.86741
16TO-07_99.FIN2	648	8.06	0.572	0.023	0.0733	0.0032	0.67755	456	15	455	19	514	74	455	19	0.219298
16TO-07_100.FIN2	788	1.563	0.1914	0.0073	0.028	0.0011	0.60572	177.5	6.2	178	6.7	157	69	178	6.7	0.28169
16TO-07_101.FIN2	888	1.173	0.0664	0.003	0.01	0.00033	0.24464	65.5	2.8	64.1	2.1	113	92	64.1	2.1	2.1374
16TO-07_102.FIN2	673	1.249	0.1222	0.0041	0.01812	0.00057	0.41215	116.9	3.7	115.8	3.6	148	73	115.8	3.6	0.940975
16TO-07_103.FIN2	248.6	1.35	0.442	0.017	0.0583	0.0018	0.47784	372	11	364.8	11	388	71	364.8	11	1.93548
16TO-07_104.FIN2	249	1.512	0.847	0.036	0.0944	0.0049	0.56448	627	18	581	29	769	96	581	29	7.33652
16TO-07_105.FIN2	345	1.22	0.0971	0.0056	0.0153	0.00049	0.23673	94.6	5.1	97.9	3.1	80	100	97.9	3.1	3.48837
16TO-07_106.FIN2	266.3	1.575	0.1074	0.0057	0.01528	0.00045	0.21643	103.8	5.3	97.8	2.8	250	100	97.8	2.8	5.78035
16TO-07_107.FIN2	364	1.998	0.0758	0.0038	0.0113	0.00031	0.30198	74	3.5	72.4	2	138	93	72.4	2	2.16216
16TO-07_108.FIN2	311	1.762	0.1052	0.0056	0.01492	0.00039	0.11951	101.7	5.2	95.5	2.5	220	110	95.5	2.5	6.09636
16TO-07_109.FIN2	89.4	2.38	4.26	0.13	0.2995	0.0079	0.041583	1680	26	1687	39	1655	50	1655	50	1.93353
16TO-07_110.FIN2	369	1.915	0.573	0.015	0.0737	0.0017	0.42479	459.8	9.7	458	10	458	55	458	10	0.391475
16TO-07_111.FIN2	564	1.276	0.196	0.012	0.0269	0.0012	0.17087	182.5	9.5	170.8	7.4	270	130	170.8	7.4	6.41096
16TO-07_112.FIN2	536	4.33	0.624	0.034	0.0789	0.004	0.36494	490	21	489	24	450	130	489	24	0.204082
16TO-07_113.FIN2	239.4	1.666	0.0852	0.0081	0.01232	0.00056	0.043051	82.7	7.6	78.9	3.6	250	210	78.9	3.6	4.59492
16TO-07_114.FIN2	156.3	0.49	0.186	0.011	0.02357	0.00095	0.29166	173.7	9.6	150.1	6	470	130	150.1	6	13.5866
16TO-07_115.FIN2	606	3.92	0.0972	0.0041	0.01453	0.00045	0.32347	94	3.8	93	2.9	122	83	93	2.9	1.06383
16TO-07_116.FIN2	137.5	1.74	4.019	0.11	0.2866	0.0081	0.59461	1639	21	1622	40	1648	41	1648	41	1.57767
16TO-07_117.FIN2	756	0.605	0.0724	0.0029	0.01073	0.00032	0.34789	70.9	2.8	68.8	2	148	78	68.8	2	2.96192
16TO-07_118.FIN2	321.2	1.308	0.0943	0.0049	0.01361	0.00043	0.26358	91.8	4.4	87.1	2.7	210	100	87.1	2.7	5.11983
16TO-07_119.FIN2	333	2.95	1.794	0.04	0.177	0.0042	0.56804	1041	15	1054	23	1006	42	1006	42	4.77137
16TO-07_120.FIN2	299.1	1.992	0.305	0.018	0.0409	0.0019	0.28685	269	14	260	11	340	130	260	11	3.34572
16TO-07_121.FIN2	211.8	1.222	0.0811	0.0052	0.01175	0.0005	0.055831	79.1	4.8	75.3	3.2	190	150	75.3	3.2	4.80405
16TO-07_122.FIN2	59.3	0.652	0.174	0.013	0.02548	0.001	0.22583	162	11	162.1	6.3	180	140	162.1	6.3	0.0617284
16TO-07_123.FIN2	693	3.29	0.1635	0.0089	0.0123	0.00055	0.70109	153.1	7.7	78.8	3.5	1487	73	DISC	DISC	48.5304
16TO-07_124.FIN2	497	4.4	0.0828	0.0033	0.01244	0.00036	0.46235	81.3	3	79.7	2.3	121	78	79.7	2.3	1.96802
16TO-07_125.FIN2	145.2	1.456	0.0931	0.0064	0.01411	0.00041	0.15663	89.9	5.9	90.3	2.6	80	120	90.3	2.6	0.444939
16TO-07_126.FIN2	240.5	1.624	2.999	0.063	0.2415	0.005	0.52797	1405	16	1394	26	1422	35	1422	35	1.96906
16TO-07_127.FIN2	854	4.04	1.47	0.049	0.1443	0.0049	0.77774	921	20	868	28	1025	43	1025	43	15.3171
16TO-07_128.FIN2	836	1.088	0.1941	0.0063	0.02766	0.00072	0.30451	179.9	5.3	175.9	4.5	194	68	175.9	4.5	2.22346
16TO-07_129.FIN2	140.1	1.651	0.144	0.012	0.01684	0.0005	0.39655	136	10	107.6	3.2	620	160	DISC	DISC	20.8824
16TO-07_130.FIN2	702	1.073	0.0984	0.0031	0.01413	0.00042	0.41342	95.2	2.9	90.4	2.7	216	67	90.4	2.7	5.04202
16To_08_3.FIN2	153.8	2.833	0.149	0.005	0.02217	0.0004	0.2467	140.9	4.4	141.3	2.5	142	64	141.3	2.5	0.283889
16To_08_4.FIN2	22.85	1.077	2.2	0.064	0.2069	0.0036	0.18945	1185	21	1212	19	1150	52	1150	52	5.3913
16To_08_5.FIN2	160	1.786	3.167	0.093	0.2572	0.0059	0.52417	1452	24	1474	30	1429	48	1429	48	3.14906
16To_08_6.FIN2	144.6	1.951	0.213	0.0075	0.03077	0.0006	0.20779	196.2	6.4	195.4	3.8	214	69	195.4	3.8	0.407747
16To_08_7.FIN2	434	8.31	3.282	0.094	0.2601	0.0061	0.67162	1475	23	1489	31	1449	44	1449	44	2.76052
16To_08_8.FIN2	542.6	28.5	4.447	0.12	0.3106	0.0057	0.50008	1720.8	21	1743	28	1712	39	1712	39	1.81075
16To_08_9.FIN2	270	3.62	0.0992	0.0036	0.01471	0.0003	0.27764	95.9	3.3	94.1	1.9	130	67	94.1	1.9	1.87696
16To_08_10.FIN2	205.1	4.68	0.0991	0.0036	0.01467	0.00027	0.098018	95.9	3.3	93.9	1.7	159	67	93.9	1.7	2.08551
16To_08_11.FIN2	146.6	1.413	0.245	0.009	0.03497	0.00084	0.17949	222.2	7.3	221.5	5.2	224	79	221.5	5.2	0.315032
16To_08_12.FIN2	413	1.979	0.0854	0.0032	0.0132	0.00031	0.34772	83.1	3	84.5	2	33	63	84.5	2	1.68472
16To_08_13.FIN2	374.1	1.045	0.0945	0.0038	0.01338	0.00028	0.13548	91.7	3.5	85.7	1.8	283	86	85.7	1.8	6.54308
16To_08_14.FIN2	351	1.177	0.1014	0.004	0.01493	0.00032	0.09132	97.9	3.7	95.6	2	151	71	95.6	2	2.34934
16To_08_15.FIN2	111.9	1.007	0.4145	0.014	0.05573	0.00096	0.18932	351.3	9.7	349.6	5.9	360	62	349.6	5.9	0.483917
16To_08_16.FIN2	206.9	2.543	1.764	0.045	0.1763	0.0031	0.42092	1032.3	16	1047	17	1013	41	1013	41	3.35637
16To_08_17.FIN2	88.2	0.7659	0.0784	0.0044	0.01265	0.00029	0.14225	76.8	4.2	81	1.9	34	99	81	1.9	5.46875
16To_08_18.FIN2	238	2.305	3.341	0.089	0.2705	0.0053	0.69509	1491.4	21	1542	27	1403	41	1403	41	9.90734
16To_08_19.FIN2	738	1.392	0.2167	0.007	0.03054	0.00068	0.49586	198.9	5.8	193.9	4.2	264	56	193.9	4.2	2.51383
16To_08_20.FIN2	313.6	1.345	0.0821	0.0029	0.01235	0.00023	0.065679	80.1	2.8	79.11	1.5	124	69	79.11	1.5	1.23596
16To_08_21.FIN2	124.4	0.899	0.0701	0.0049	0.01068	0.00048	0.42234	68.4	4.7	68.4	3	150	130	68.4	3	0
16To_08_22.FIN2	235	1.448	0.1025	0.0043	0.01414	0.0003	0.17685	99	3.9	90.5	1.9	289	82	90.5	1.9	8.58586
16To_08_23.FIN2	276.1	3.19	1.991	0.066	0.187	0.005	0.64192	1111	22	1103	27	1108	52	1108	52	0.451264
16To_08_24.FIN2	349	3.61	0.0863	0.003	0.01298	0.00026	0.26781	84	2.8	83.1	1.6	127	64	83.1	1.6	1.07143
16To_08_25.FIN2	414	1.209	0.112	0.0037	0.01719	0.00034	0.38519	107.7	3.3	109.9	2.1	73	56	109.9	2.1	2.04271
16To_08_26.FIN2	72.8	1.735	0.108	0.0056	0.01605	0.00041	0.049067	104.2	5.2	102.6	2.6	156	100	102.6	2.6	1.53551
16To_08_27.FIN2	111.3	2.839	0.1152	0.0057	0.01484	0.00036	0.21155	112.2	5.5	95	2.3	476	110	DISC	DISC	15.3298
16To_08_28.FIN2	271	3.56	0.0916	0.004	0.01281	0.00041	0.30873	88.8	3.7	82	2.6	251	86	82	2.6	7.65766
16To_08_29.FIN2	216.5	3.693	0.0947	0.0041	0.01418	0.00035	0.43071	91.7	3.8	90.8	2.2	142	78	90.8	2.2	0.981461
16To_08_30.FIN2	65.5	3.04	2.36	0.074	0.2118	0.0045	0.51204	1227	22	1238	24	1220	50	1220	50	1.47541
16To_08_31.FIN2	187.5	4.89	0.3193	0.0099	0.04495	0.00088	0.38277	280.9	7.6	283.4	5.4	244	58	283.4	5.4	0.889996
16To_08_32.FIN2	203	0.862	0.1611	0.0056	0.02379	0.00047	0.22473	151.5	4.9	151.6	3	155	67	151.6	3	0.0660066
16To_08_33.FIN2	410	6.19	4.411	0.11	0.3131	0.0055	0.60867	1714.2	21	1755	27	1666	36	1666	36	5.34214
16To_08_34.FIN2	213.9	1.018	0.2578	0.0084	0.03611	0.00066	0.26263	233.4	6.9	228.6	4.1	265	63	228.6	4.1	2.05656
16To_08_35.FIN2	132.7	1.417	0.1028	0.0097	0.01511	0.00075	0.16205	99.2	8.9	96.7	4.7	150	200	96.7	4.7	2.52016
16To_08_36.FIN2	152.8	2.65	2.105	0.084	0.1904	0.0055	0.90744	1145	28	1125	30	1163	44	1163	44	3.26741
16To_08_37.FIN2	61.2	2.016	0.1162	0.008	0.01606	0.00044	0.065129	111	7.2	102.7	2.8	280	130	102.7	2.8	7.47748
16To_08_38.FIN2	124.2	2.632	0.0908	0.0044	0.013	0.0003	0.1611	88	4.1	83.2	1.9	181	95	83.2	1.9	5.45455
16To_08_39.FIN2	248	2.23	3.328	0.089	0.2676	0.0046	0.72397	1487.9	21	1529	23	1421	38	1421	38	7.60028
16To_08_40.FIN2	420	3.2	0.094	0.0034	0.0139	0.00034	0.34549	91.1	3.1	89	2.2	137	67	89	2.2	2.30516
16To_08_41.FIN2	85.6	1.458	0.1036	0.0053	0.01535	0.00037	0.23509	99.8	4.8	98.2	2.3	157	95	98.2	2.3	1.60321
16To_08_42.FIN2	166.9	1.51	1.34	0.041	0.1366	0.0029	0.55899	862	18	826	17	918	50	826	17	4.17633
16To_08_43.FIN2	321.5	1.692	0.0791	0.003	0.0118	0.00027	0.28918	77.4	2.8	75.6	1.7	100	68	75.6	1.7	2.32558
16To_08_44.FIN2	87.7	1.931	3.94	0.22	0.286	0.015	0.84234	1613	46	1618	77	1579	59	1579	59	2.46992
16To_08_45.FIN2	109	1.081	5.368	0.14	0.3419	0.0061	0.58765	1878.4	22	1895	29	1855	38	1855	38	2.15633
16To_08_46.FIN2	94.2	1.035	0.0815	0.0048	0.01183	0.0003	0.023726	79.6	4.5	75.8	1.9	210	120	75.8	1.9	4.77387
16To_08_47.FIN2	122.5	2.2	0.0783	0.0055	0.01236	0.00048	0.46287	76.7	5.2	79.2	3.1	90	110	79.2	3.1	3.25945
16To_08_48.FIN2	552	1.791	0.0972	0.0029	0.0147	0.00026	0.25595	94.1	2.7	94.13	1.6	98	55	94.13	1.6	0.031881
16To_08_49.FIN2	351	2.79	0.4706	0.013	0.06283	0.0011	0.47516	391.7	8.9	392.8	6.9	378	51	392.8	6.9	0.280827
16To_08_50.FIN2	241.4	1.651	0.1116	0.0049	0.01701	0.00054	0.18732	107.2	4.5	108.7	3.4	88	90	108.7	3.4	1.39925
16To_08_51.FIN2	33.6	1.316	2.012	0.068	0.1812	0.0043	0.5697	1119	23	1073	23	1174	53	1174	53	8.60307
16To_08_52.FIN2	377	1.378	0.0797	0.0027	0.01185	0.00022	0.25932	78	2.6	75.97	1.4	145	65	75.97	1.4	2.60256
16To_08_53.FIN2	526	1.704	0.0851	0.0028	0.01296	0.00026	0.31841	82.9	2.6	83	1.6	84	61	83	1.6	0.120627
16To_08_54.FIN2	50.2	1.411	0.827	0.026	0.0996	0.0018	0.20021	612.5	14	611.9	11	582	64	611.9	11	0.0979592
16To_08_55.FIN2	184	2.305	0.084	0.0035	0.01281	0.00026	0.07405	81.8	3.3	82	1.7	84	79	82	1.7	0.244499
16To_08_56.FIN2	239	1.137	0.5766	0.016	0.07444	0.0012	0.0057348	461.7	10	462.8	7.5	430	52	462.8	7.5	0.23825
16To_08_57.FIN2	337	2.636	0.0787	0.0031	0.01182	0.00023	0.095859	77.1	2.8	75.8	1.5	101	68	75.8	1.5	1.68612
16To_08_58.FIN2	322	2.88	0.0936	0.0062	0.01322	0.00065	0.26014	90.7	5.8	84.7	4.1	210	140	84.7	4.1	6.61521
16To_08_59.FIN2	278	3.57	0.0959	0.0048	0.01318	0.00045	0.21712	92.7	4.4	84.4	2.9	265	90	84.4	2.9	8.95361
16To_08_61.FIN2	554	0.844	0.1989	0.0058	0.02915	0.00053	0.52883	184	4.9	185.2	3.3	179	53	185.2	3.3	0.652174
16To_08_62.FIN2	358.1	2.113	0.0605	0.0027	0.00934	0.00025	0.32248	59.6	2.6	59.9	1.6	15	73	59.9	1.6	0.503356
16To_08_63.FIN2	383	2.036	0.1062	0.0037	0.01561	0.00032	0.22531	102.4	3.4	99.8	2	151	61	99.8	2	2.53906
16To_08_64.FIN2	211.3	3.281	2.818	0.073	0.2407	0.0043	0.47363	1359.3	20	1390	22	1307	42	1307	42	6.35042
16To_08_65.FIN2	139.3	1.296	0.0707	0.0041	0.00974	0.00027	0.03756	69.1	3.9	62.5	1.7	250	110	62.5	1.7	9.55137
16To_08_67.FIN2	118.5	1.487	0.186	0.0072	0.02663	0.00061	0.15606	172.8	6.2	169.4	3.8	219	80	169.4	3.8	1.96759
16To_08_68.FIN2	53.3	1.115	13.22	0.36	0.5356	0.011	0.87725	2693	26	2769	47	2636	35	2636	35	5.04552
16To_08_69.FIN2	247	2.227	0.0986	0.0039	0.01486	0.00038	0.1959	95.4	3.6	95.1	2.4	77	79	95.1	2.4	0.314465
16To_08_70.FIN2	68.9	1.448	0.357	0.017	0.047	0.0017	0.40638	308	13	296.1	10	350	94	296.1	10	3.86364
16To_08_72.FIN2	105.1	1.927	0.1026	0.0053	0.01517	0.00035	0.32212	98.8	4.9	97	2.2	165	98	97	2.2	1.82186
16To_08_73.FIN2	131.1	0.849	4.459	0.12	0.3193	0.0063	0.6266	1724.4	22	1785	31	1652	39	1652	39	8.05085
16To_08_74.FIN2	166	3.083	0.0987	0.0042	0.01422	0.00033	0.23773	95.4	3.8	91	2.1	193	80	91	2.1	4.61216
16To_08_75.FIN2	224	3.15	0.1021	0.0041	0.01499	0.00036	0.34133	98.6	3.7	95.9	2.3	175	73	95.9	2.3	2.73834
16To_08_78.FIN2	76.6	2.352	0.0971	0.0055	0.01412	0.00034	0.05143	94.2	5	90.4	2.1	180	110	90.4	2.1	4.03397
16To_08_79.FIN2	43.1	1.97	6.74	0.19	0.3908	0.0091	0.56655	2079	25	2127	43	2045	43	2045	43	4.00978
16To_08_80.FIN2	24	1.357	0.733	0.039	0.0886	0.0035	0.2898	557	23	546	21	650	110	546	21	1.97487
16To_08_81.FIN2	170.7	3.478	0.0906	0.0037	0.01315	0.00026	0.017788	88.2	3.5	84.2	1.6	207	84	84.2	1.6	4.53515
16To_08_82.FIN2	387	3.75	0.0776	0.0027	0.01145	0.00023	0.18977	75.8	2.5	73.4	1.5	162	67	73.4	1.5	3.16623
16To_08_83.FIN2	324.6	8.03	0.0797	0.0038	0.0112	0.00037	0.19455	77.7	3.6	71.8	2.4	235	83	71.8	2.4	7.59331
16To_08_85.FIN2	128.7	2.322	0.0889	0.0046	0.01287	0.0003	0.26713	85.7	4.2	82.4	1.9	159	91	82.4	1.9	3.85064
16To_08_86.FIN2	160.4	1.591	15.54	0.4	0.5741	0.0098	0.68134	2850.5	25	2923	40	2782	33	2782	33	5.0683
16To_08_87.FIN2	345	1.961	0.1004	0.0035	0.01469	0.00035	0.29112	97	3.3	94	2.2	163	69	94	2.2	3.09278
16To_08_88.FIN2	262.4	3.542	0.0986	0.0042	0.01446	0.00036	0.28655	95.3	3.9	92.5	2.3	133	79	92.5	2.3	2.93809
16To_08_89.FIN2	120.1	1.767	5.034	0.13	0.3241	0.0052	0.6087	1827.7	21	1809	25	1825	36	1825	36	0.876712
16To_08_91.FIN2	163.7	2.195	0.1081	0.0044	0.0158	0.0003	0.30806	104	4	101.1	1.9	142	73	101.1	1.9	2.78846
16To_08_92.FIN2	1143	1.723	0.108	0.0056	0.01527	0.00064	0.40432	104	5.2	98.2	4	226	95	98.2	4	5.57692
16To_08_93.FIN2	495	1.03	0.0709	0.0027	0.01025	0.00023	0.21233	69.5	2.6	65.7	1.5	199	78	65.7	1.5	5.46763
16To_08_94.FIN2	160.1	1.866	0.0988	0.0044	0.01467	0.00033	0.16515	96	4.1	93.9	2.1	142	90	93.9	2.1	2.1875
16To_08_95.FIN2	205	3.113	0.2438	0.0087	0.03422	0.00072	0.29227	221.8	7.2	216.9	4.5	256	69	216.9	4.5	2.2092
16To_08_96.FIN2	475	0.862	0.1813	0.0055	0.02701	0.00053	0.44922	169.5	4.6	171.8	3.3	90	53	171.8	3.3	1.35693
16To_08_98.FIN2	103.8	1.081	2.124	0.06	0.1976	0.0038	0.54155	1156	19	1162	20	1129	46	1129	46	2.92294
16To_08_99.FIN2	333	1.968	0.1004	0.0035	0.01527	0.00028	0.19765	97	3.2	97.7	1.8	88	63	97.7	1.8	0.721649
16To_08_100.FIN2	970	3.22	0.0662	0.0036	0.00972	0.00053	0.63177	65	3.4	62.3	3.4	178	98	62.3	3.4	4.15385
16To_08_101.FIN2	103.2	1.312	0.324	0.013	0.0451	0.0014	0.0015424	284	9.7	284.4	8.8	261	75	284.4	8.8	0.140845
16To_08_102.FIN2	390.1	3.79	0.0714	0.0025	0.01071	0.00019	0.1006	70	2.4	68.7	1.2	113	64	68.7	1.2	1.85714
16To_08_103.FIN2	381	2.185	0.2458	0.007	0.03479	0.00064	0.2957	223.3	5.8	220.5	4	255	55	220.5	4	1.25392
16To_08_104.FIN2	441	0.994	0.1833	0.0053	0.02677	0.00046	0.34375	171.3	4.6	170.3	2.9	171	53	170.3	2.9	0.583771
16To_08_106.FIN2	275	1.473	0.2995	0.009	0.04188	0.00086	0.46434	266.5	7.1	264.4	5.3	267	57	264.4	5.3	0.787992
16To_08_107.FIN2	345	1.535	0.1003	0.0033	0.01507	0.00028	0.11333	96.9	3.1	96.4	1.8	129	66	96.4	1.8	0.515996
16To_08_108.FIN2	181	1.119	0.295	0.0098	0.04164	0.00089	0.28625	261.9	7.7	262.9	5.5	249	64	262.9	5.5	0.381825
16To_08_109.FIN2	185.3	2.537	3.193	0.084	0.2592	0.005	0.59264	1454.1	20	1485	26	1410	40	1410	40	5.31915
16To_08_110.FIN2	261.6	1.005	0.2004	0.0062	0.02895	0.00053	0.18868	185.3	5.2	184	3.3	177	59	184	3.3	0.701565
16To_08_111.FIN2	136	1.113	0.61	0.019	0.0808	0.0016	0.3875	485.1	12	500.7	9.5	432	57	500.7	9.5	3.21583
16To_08_112.FIN2	227	1.219	0.1149	0.0042	0.01713	0.00037	0.29062	110.3	3.9	109.5	2.4	140	67	109.5	2.4	0.725295
16To_08_113.FIN2	129	2.744	0.102	0.0042	0.01499	0.00032	0.28943	98.8	3.9	95.9	2	159	79	95.9	2	2.93522
16To_08_114.FIN2	389	2.65	0.0699	0.0023	0.010479	0.00018	0.042796	68.7	2.2	67.2	1.1	109	62	67.2	1.1	2.18341
16To_08_115.FIN2	371	1.157	0.1662	0.0052	0.02448	0.00044	0.44664	156.4	4.5	155.9	2.8	154	57	155.9	2.8	0.319693
16To_08_117.FIN2	66.3	1.251	0.1137	0.0073	0.01661	0.00041	0.0052244	108.8	6.6	106.2	2.6	180	130	106.2	2.6	2.38971
16To_08_118.FIN2	173.8	1.154	0.0839	0.0036	0.01272	0.00031	0.17955	81.9	3.3	81.4	2	145	86	81.4	2	0.610501
16To_08_119.FIN2	289	2.575	0.0864	0.0032	0.01298	0.00031	0.39536	84.1	3	83.1	2	124	68	83.1	2	1.18906
16To_08_120.FIN2	239	1.174	0.0807	0.0036	0.01215	0.00025	0.027735	78.6	3.4	77.8	1.6	64	70	77.8	1.6	1.01781
16To_08_122.FIN2	23.56	1.948	4.451	0.13	0.3163	0.0065	0.32365	1719	24	1770	32	1666	45	1666	45	6.2425
16To_08_123.FIN2	264	2.322	0.0684	0.0026	0.01027	0.00021	0.18617	67.1	2.4	65.83	1.3	99	71	65.83	1.3	1.8927
16To_08_124.FIN2	127	1.328	0.872	0.026	0.1032	0.0025	0.47348	636.3	14	633	14	624	57	633	14	0.518623
16To_08_125.FIN2	130.1	2.215	0.0969	0.0045	0.0135	0.00031	0.011662	93.6	4.2	86.4	2	247	89	86.4	2	7.69231
16To_08_126.FIN2	164	1.482	0.0849	0.0051	0.01291	0.00061	0.46466	82.5	4.7	82.7	3.9	150	110	82.7	3.9	0.242424
16To_08_127.FIN2	1032	1.905	0.1716	0.0062	0.02531	0.00072	0.49726	160.7	5.3	161.1	4.5	143	70	161.1	4.5	0.248911
16To_08_128.FIN2	35.22	2.082	0.1058	0.0076	0.01528	0.00046	0.094505	103	7	97.7	2.9	270	140	97.7	2.9	5.14563
16To_08_129.FIN2	609	1.053	0.0798	0.0033	0.01144	0.00027	0.6032	78	3.1	73.3	1.7	197	70	73.3	1.7	6.02564
16To_08_130.FIN2	283.8	1.234	0.0906	0.0034	0.01362	0.00025	0.30026	88	3.1	87.2	1.6	115	66	87.2	1.6	0.909091
16To_08_131.FIN2	110.9	3.73	0.1064	0.0064	0.01557	0.00068	0.37742	102.1	5.9	99.6	4.3	148	100	99.6	4.3	2.44858
16To_08_132.FIN2	215	1.497	0.1639	0.0056	0.02436	0.00054	0.32727	153.9	4.9	155.1	3.4	123	64	155.1	3.4	0.779727
16To_08_133.FIN2	219.7	3.38	4.898	0.15	0.3238	0.0075	0.54053	1804	24	1809	37	1777	46	1777	46	1.80079
16To_09_1.FIN2	126.1	1.567	4.329	0.16	0.3029	0.0088	0.6107	1697.7	30	1705	43	1691	45	1691	45	0.827912
16To_09_2.FIN2	698	0.991	0.0682	0.003	0.01014	0.00031	0.45714	66.9	2.8	65.06	2	136	68	65.06	2	2.75037
16To_09_3.FIN2	286	0.983	0.5141	0.02	0.06687	0.0019	0.33373	420.7	13	417.2	12	458	58	417.2	12	0.831947
16To_09_5.FIN2	44.72	1.299	0.28	0.024	0.03609	0.0014	0.27199	249	19	229.6	8.2	400	160	229.6	8.2	7.79116
16To_09_6.FIN2	192	1.203	4.186	0.15	0.3023	0.0088	0.62423	1671.2	30	1702	43	1620	46	1620	46	5.06173
16To_09_7.FIN2	231.1	2.585	2.161	0.08	0.197	0.0058	0.48724	1169.6	26	1159	31	1172	49	1172	49	1.10922
16To_09_8.FIN2	157.3	1.321	0.1145	0.0055	0.01629	0.00053	0.21037	109.9	5	104.2	3.4	225	85	104.2	3.4	5.18653
16To_09_9.FIN2	133.3	1.513	0.217	0.01	0.02678	0.00099	0.27234	199	8.4	170.3	6.2	526	90	170.3	6.2	14.4221
16To_09_11.FIN2	628	2.821	0.0853	0.0035	0.01287	0.00041	0.03045	83.1	3.3	82.4	2.6	132	68	82.4	2.6	0.842359
16To_09_12.FIN2	515.7	2.63	0.3285	0.013	0.04566	0.0014	0.37965	288.6	9.6	287.8	8.8	288	64	287.8	8.8	0.2772
16To_09_13.FIN2	389	1.541	0.0922	0.0039	0.01423	0.00043	0.28429	89.5	3.6	91.1	2.8	58	65	91.1	2.8	1.78771
16To_09_14.FIN2	101.1	2.064	1.804	0.068	0.1753	0.0052	0.48651	1046.5	25	1042	28	1061	54	1061	54	1.79076
16To_09_15.FIN2	107.1	1.026	3.206	0.12	0.2575	0.0074	0.5738	1458.2	28	1478	38	1434	48	1434	48	3.06834
16To_09_16.FIN2	708	1.776	0.0626	0.0027	0.00938	0.00031	0.16596	61.7	2.6	60.2	2	137	69	60.2	2	2.43112
16To_09_17.FIN2	111.1	1.303	3.264	0.12	0.2611	0.0075	0.56272	1471.1	29	1495	38	1458	47	1458	47	2.53772
16To_09_18.FIN2	177.1	1.81	0.856	0.033	0.1028	0.0031	0.4549	627.9	18	631.4	18	642	60	631.4	18	0.557414
16To_09_19.FIN2	106.3	0.6661	0.521	0.022	0.06745	0.002	0.26585	425	15	421.3	12	440	72	421.3	12	0.870588
16To_09_20.FIN2	655	5.16	4.023	0.15	0.28	0.0083	0.59015	1639.2	30	1591	42	1704	46	1704	46	6.63146
16To_09_21.FIN2	166	1.502	0.577	0.024	0.0741	0.0025	0.48905	463.3	16	460.9	15	466	71	460.9	15	0.518023
16To_09_22.FIN2	419.8	2.202	4.666	0.18	0.3137	0.01	0.63662	1763	30	1761	51	1763	45	1763	45	0.113443
16To_09_23.FIN2	139.4	1.565	13.79	0.51	0.5383	0.016	0.6858	2735.5	35	2775	65	2701	41	2701	41	2.73973
16To_09_24.FIN2	107.4	2.135	0.1018	0.0057	0.01538	0.00049	0.15214	98.7	5.3	98.4	3.1	113	100	98.4	3.1	0.303951
16To_09_26.FIN2	333	1.233	0.1352	0.0058	0.01963	0.0006	0.26129	128.6	5.2	125.3	3.8	172	71	125.3	3.8	2.5661
16To_09_27.FIN2	188.2	1.815	4.437	0.16	0.3096	0.0094	0.67034	1719.2	31	1738	46	1697	47	1697	47	2.41603
16To_09_28.FIN2	211.8	0.981	0.0703	0.0034	0.00997	0.00032	0.36522	68.9	3.2	63.9	2.1	231	82	63.9	2.1	7.25689
16To_09_29.FIN2	492	1.468	0.0771	0.0033	0.01176	0.00035	0.19582	75.4	3.1	75.38	2.2	96	67	75.38	2.2	0.0265252
16To_09_30.FIN2	387	1.021	0.1927	0.0098	0.02722	0.0011	0.33126	178.6	8.3	173.1	6.8	254	97	173.1	6.8	3.07951
16To_09_31.FIN2	86	2.445	0.1095	0.0068	0.01457	0.00048	0.15803	105.1	6.2	93.3	3	315	110	93.3	3	11.2274
16To_09_33.FIN2	570	47.5	4.398	0.16	0.3097	0.009	0.62443	1712.5	31	1739	44	1675	45	1675	45	3.8209
16To_09_34.FIN2	789	1.408	0.0886	0.0038	0.01336	0.00044	0.46057	86.2	3.5	85.6	2.8	127	68	85.6	2.8	0.696056
16To_09_35.FIN2	208	1.234	0.3055	0.013	0.04187	0.0013	0.067202	269.4	10	264.4	7.8	316	72	264.4	7.8	1.85598
16To_09_36.FIN2	946	1.842	0.1788	0.0078	0.02549	0.001	0.46381	166.9	6.7	162.2	6.6	243	84	162.2	6.6	2.81606
16To_09_37.FIN2	326.3	2.495	0.0889	0.0039	0.01329	0.00042	0.19738	86.4	3.7	85.1	2.7	136	74	85.1	2.7	1.50463
16To_09_38.FIN2	66.1	3.12	2.2	0.083	0.2009	0.006	0.50043	1182	26	1181	32	1183	52	1183	52	0.169062
16To_09_40.FIN2	348	2.079	0.1714	0.0069	0.025	0.00079	0.37585	160.5	6	159.1	5	180	66	159.1	5	0.872274
16To_09_41.FIN2	587.6	1.356	0.0879	0.0035	0.01345	0.0004	0.21575	85.6	3.2	86.1	2.5	103	63	86.1	2.5	0.584112
16To_09_42.FIN2	43.7	2.294	1.523	0.059	0.1506	0.0045	0.35302	939	24	904	25	1029	56	1029	56	12.1477
16To_09_43.FIN2	276	2.2	1.783	0.068	0.1707	0.0053	0.75697	1038.9	25	1016	29	1087	49	1087	49	6.53174
16To_09_44.FIN2	157.8	2.18	1.702	0.063	0.174	0.0051	0.54142	1009	24	1033.8	28	971	53	971	53	6.46756
16To_09_45.FIN2	285.5	1.343	0.0824	0.0037	0.01241	0.00037	0.098557	80.4	3.5	79.5	2.4	125	78	79.5	2.4	1.1194
16To_09_46.FIN2	404	4.02	0.0777	0.0039	0.01201	0.00052	0.51297	76.2	3.7	76.9	3.3	109	84	76.9	3.3	0.918635
16To_09_47.FIN2	628	1.697	0.1716	0.0067	0.02493	0.00075	0.3009	161.3	5.9	158.8	4.7	206	63	158.8	4.7	1.54991
16To_09_48.FIN2	348	1.431	0.0822	0.0041	0.01237	0.0004	0.35024	80.2	3.9	79.2	2.5	69	87	79.2	2.5	1.24688
16To_09_49.FIN2	336.4	1.522	0.1065	0.0047	0.01481	0.00046	0.18098	102.6	4.3	94.8	2.9	263	77	94.8	2.9	7.60234
16To_09_50.FIN2	118.4	1.301	0.209	0.017	0.0274	0.0015	0.1961	192	14	174.3	9.3	400	150	174.3	9.3	9.21875
16To_09_51.FIN2	131.5	1.996	0.0843	0.0064	0.0118	0.00046	0.13404	82	6	75.6	2.9	240	150	75.6	2.9	7.80488
16To_09_52.FIN2	133	3.05	3.892	0.17	0.2777	0.01	0.52576	1611	34	1576	52	1655	64	1655	64	4.77341
16To_09_54.FIN2	206.3	1.975	0.0886	0.0049	0.01296	0.00044	0.332	86	4.6	83	2.8	174	99	83	2.8	3.48837
16To_09_55.FIN2	193	3.19	4.21	0.15	0.3008	0.0085	0.4686	1675.1	30	1696	43	1639	45	1639	45	3.47773
16To_09_56.FIN2	189.9	2.204	0.0907	0.0048	0.01362	0.00042	0.022296	88	4.4	87.2	2.7	113	92	87.2	2.7	0.909091
16To_09_57.FIN2	289	1.976	0.5899	0.022	0.07521	0.0022	0.4292	470.9	14	467.4	13	478	58	467.4	13	0.743258
16To_09_58.FIN2	638	1.746	0.0623	0.0029	0.00927	0.00032	0.36962	61.4	2.7	59.5	2	123	70	59.5	2	3.09446
16To_09_59.FIN2	171.4	1.062	2.01	0.074	0.191	0.0055	0.41504	1118	25	1126.7	30	1092	52	1092	52	3.17766
16To_09_60.FIN2	210.6	1.319	0.0838	0.0043	0.01232	0.00038	0.13257	81.6	4	78.9	2.4	158	83	78.9	2.4	3.30882
16To_09_61.FIN2	291	1.96	0.0931	0.0046	0.01393	0.00045	0.44521	90.2	4.2	89.2	2.9	131	79	89.2	2.9	1.10865
16To_09_63.FIN2	82.5	2.655	1.805	0.069	0.1756	0.0052	0.27675	1047.6	25	1043	28	1058	55	1058	55	1.41777
16To_09_64.FIN2	436	2.203	0.3017	0.012	0.04246	0.0012	0.41786	267.9	9.5	268.1	7.7	260	67	268.1	7.7	0.0746547
16To_09_65.FIN2	163.2	1.533	0.0864	0.0064	0.01315	0.00046	0.036404	84	6	84.2	2.9	120	140	84.2	2.9	0.238095
16To_09_66.FIN2	503	2.92	0.257	0.01	0.03652	0.0012	0.38904	232.4	8.1	231.2	7.2	221	64	231.2	7.2	0.516351
16To_09_67.FIN2	546	1.015	0.1995	0.0083	0.02884	0.00087	0.4455	184.5	7	183.3	5.4	200	67	183.3	5.4	0.650407
16To_09_68.FIN2	515	1.526	0.0972	0.004	0.01429	0.00043	0.05934	94.2	3.7	91.5	2.7	143	68	91.5	2.7	2.86624
16To_09_69.FIN2	154.1	1.863	4.04	0.17	0.2822	0.011	0.87593	1640	36	1611	55	1666	50	1666	50	3.30132
16To_09_70.FIN2	79.4	0.795	1.704	0.065	0.1695	0.0049	0.30829	1008.3	25	1009.9	27	979	52	979	52	3.15628
16To_09_71.FIN2	181.4	1.623	0.0689	0.004	0.01016	0.00033	0.013228	67.6	3.8	65.2	2.1	116	100	65.2	2.1	3.5503
16To_09_72.FIN2	193.6	9.97	0.524	0.022	0.0674	0.0022	0.50061	426.9	14	420.6	14	415	68	420.6	14	1.47576
16To_09_73.FIN2	526	2.58	0.0662	0.0029	0.00971	0.0003	0.32616	65.1	2.8	62.31	1.9	134	69	62.31	1.9	4.28571
16To_09_74.FIN2	380	7.64	0.639	0.028	0.0805	0.0028	0.52487	501.7	17	499	17	496	71	499	17	0.53817	Rim
16To_09_74.FIN2	388	3.751	2.401	0.092	0.2097	0.0065	0.85126	1242	28	1227	35	1237	47	1237	47	0.808407	Core
16To_09_75.FIN2	405	2.267	0.0831	0.0055	0.01254	0.00046	0.1229	81	5.1	80.3	2.9	110	120	80.3	2.9	0.864198
16To_09_76.FIN2	186.1	2.066	1.928	0.071	0.1847	0.0053	0.43509	1091.4	24	1092.6	29	1053	52	1053	52	3.76068
16To_09_77.FIN2	337.1	2.335	0.0697	0.0032	0.01032	0.00032	0.27057	68.4	3.1	66.17	2	160	76	66.17	2	3.26023
16To_09_78.FIN2	54.1	1.068	0.59	0.025	0.07559	0.0022	0.24488	470.7	16	469.7	13	445	73	469.7	13	0.21245
16To_09_80.FIN2	461	1.569	0.1154	0.0046	0.01712	0.0005	0.099902	111	4.3	109.4	3.2	115	63	109.4	3.2	1.44144
16To_09_81.FIN2	383.2	1.218	0.1875	0.0072	0.02683	0.00078	0.30663	174.6	6.3	170.7	4.9	214	63	170.7	4.9	2.23368
16To_09_82.FIN2	415	6.06	4.004	0.15	0.285	0.0084	0.75345	1636.2	31	1616	42	1671	44	1671	44	3.29144
16To_09_83.FIN2	365.5	2.326	0.0998	0.0048	0.01465	0.00047	0.22346	96.5	4.4	93.8	3	158	84	93.8	3	2.79793
16To_09_84.FIN2	344.5	1.205	0.0695	0.0031	0.01059	0.00033	0.1109	68.2	3	67.88	2.1	103	78	67.88	2.1	0.469208
16To_09_85.FIN2	519	1.664	0.432	0.018	0.0581	0.0021	0.52276	363.6	13	364	13	413	76	364	13	0.110011
16To_09_86.FIN2	274	1.638	0.1918	0.0082	0.0281	0.00093	0.50602	177.9	7	178.6	5.9	176	69	178.6	5.9	0.393479
16To_09_87.FIN2	130.9	2.879	11.83	0.48	0.4776	0.016	0.73503	2594	38	2512	71	2679	46	2679	46	6.23367
16To_09_88.FIN2	533	1.131	0.0818	0.0037	0.01237	0.00038	0.17538	80	3.4	79.2	2.4	101	70	79.2	2.4	1
16To_09_89.FIN2	162.6	1.331	0.0958	0.0049	0.01384	0.00043	0.18233	92.8	4.5	88.6	2.8	189	88	88.6	2.8	4.52586
16To_09_90.FIN2	183.4	3.363	0.0967	0.0047	0.01474	0.0005	0.30736	93.5	4.3	94.3	3.2	143	80	94.3	3.2	0.855615
16To_09_91.FIN2	301	2.032	0.1023	0.0046	0.01487	0.00043	0.0045875	98.8	4.2	95.15	2.7	219	77	95.15	2.7	3.69433
16To_09_93.FIN2	499	1.065	0.0972	0.0039	0.01482	0.00044	0.23185	94.2	3.6	94.8	2.8	118	63	94.8	2.8	0.636943
16To_09_94.FIN2	207.8	1.664	0.3022	0.012	0.04244	0.0012	0.0030883	268.3	9.1	267.9	7.7	283	66	267.9	7.7	0.149087
16To_09_95.FIN2	259	22.7	1.935	0.074	0.1839	0.0059	0.36044	1091.6	26	1087	32	1101	57	1101	57	1.27157
16To_09_96.FIN2	162	1.453	0.0666	0.0038	0.01003	0.00032	0.040588	65.3	3.6	64.3	2	119	96	64.3	2	1.53139
16To_09_97.FIN2	324	1.798	0.1146	0.0054	0.01591	0.00047	0.055081	110.1	4.9	101.8	3	319	86	101.8	3	7.5386
16To_09_98.FIN2	60.5	1.199	2.935	0.11	0.2417	0.0076	0.6102	1389	29	1394	40	1404	53	1404	53	0.712251
16To_09_99.FIN2	81	1.033	0.0825	0.0073	0.01191	0.00042	0.47996	78.3	5.5	76.3	2.7	150	120	76.3	2.7	2.55428
16To_09_100.FIN2	169.6	1.528	0.1078	0.0052	0.01568	0.00052	0.058973	103.9	4.8	100.3	3.3	198	86	100.3	3.3	3.46487
16To_09_101.FIN2	121.8	2.92	0.725	0.032	0.0893	0.0033	0.50765	553	19	551	19	558	73	551	19	0.361664
16To_09_102.FIN2	180.5	3.132	0.4059	0.017	0.05413	0.0017	0.52077	345.4	12	339.7	11	383	70	339.7	11	1.65026
16To_09_103.FIN2	27.18	0.5307	0.847	0.036	0.101	0.003	0.082175	624	20	620.7	17	628	76	620.7	17	0.528846
16To_09_104.FIN2	227	2.101	4.651	0.18	0.3242	0.0098	0.88907	1756	32	1811	48	1681	44	1681	44	7.73349
16To_09_105.FIN2	473	1.122	0.1836	0.0078	0.02693	0.00083	0.26003	171.1	6.6	171.3	5.2	181	74	171.3	5.2	0.116891
16To_09_106.FIN2	192.7	1.458	0.1132	0.0098	0.01393	0.00047	0.012091	108.4	8.7	89.2	3	460	150	DISC	DISC	17.7122
16To_09_107.FIN2	79.6	2.11	6.53	0.26	0.3693	0.013	0.65555	2056	36	2026	61	2059	51	2059	51	1.60272
16To_09_108.FIN2	496	0.944	3.177	0.13	0.252	0.0085	0.80903	1452	31	1448	44	1476	50	1476	50	1.89702
16To_09_109.FIN2	755	71.3	3.915	0.16	0.2899	0.0089	0.83656	1617	33	1640	45	1601	47	1601	47	2.43598
16To_09_110.FIN2	564	1.195	0.0952	0.0039	0.01439	0.00045	0.40103	92.3	3.6	92.1	2.8	119	65	92.1	2.8	0.216685
16To_09_111.FIN2	289.6	0.744	0.0975	0.0042	0.01469	0.00044	0.084044	94.4	3.9	94	2.8	142	70	94	2.8	0.423729
16To_09_112.FIN2	182.2	1.171	0.886	0.035	0.1034	0.003	0.22993	641.3	17	634.2	18	656	52	634.2	18	1.10713
16To_09_113.FIN2	172	2.033	4.326	0.17	0.2991	0.0095	0.75001	1699	32	1688	48	1708	47	1708	47	1.17096
16To_09_116.FIN2	294	2.055	0.087	0.0037	0.01284	0.00041	0.070857	84.6	3.5	82.2	2.6	160	73	82.2	2.6	2.83688
16To_09_118.FIN2	242	0.8635	0.5108	0.02	0.06915	0.002	0.38046	418.5	13	431	12	367	57	431	12	2.98686
16To_09_119.FIN2	180.8	1.466	0.1743	0.0076	0.02456	0.00075	0.31959	162.9	6.6	156.4	4.7	285	71	156.4	4.7	3.99018
16To_09_120.FIN2	224	0.952	0.1207	0.0089	0.01522	0.00067	0.49093	115.4	8	97.4	4.2	520	140	DISC	DISC	15.5979
16To_09_121.FIN2	260	83.5	2.35	0.089	0.2116	0.0063	0.66285	1226	27	1238	34	1226	50	1226	50	0.978793
16To_09_122.FIN2	295.3	2.184	0.1167	0.0049	0.01734	0.00051	0.33277	112	4.5	110.8	3.2	150	68	110.8	3.2	1.07143
16To_09_123.FIN2	114.9	2.042	15.8	0.57	0.5973	0.017	0.37887	2864.8	34	3018	68	2788	40	2788	40	8.24964
16To_09_124.FIN2	187.5	2.146	4.44	0.17	0.3059	0.0099	0.55308	1717	32	1719	49	1740	51	1740	51	1.2069
16To_09_126.FIN2	950	6.1	0.1187	0.0058	0.01717	0.00066	0.44985	113.9	5.2	109.8	4.2	212	80	109.8	4.2	3.59965	Rim
16To_09_126.FIN2	303	1.272	0.1518	0.0065	0.02282	0.00068	0.29211	143.7	5.7	145.4	4.3	172	72	145.4	4.3	1.18302	Core
16To_09_128.FIN2	1230	1.571	0.1076	0.0043	0.01632	0.00049	0.48632	103.7	3.9	104.3	3.1	110	61	104.3	3.1	0.578592
16To_09_129.FIN2	526	0.918	0.0667	0.003	0.01017	0.00031	0.36369	65.5	2.9	65.24	2	124	72	65.24	2	0.396947
16To_09_130.FIN2	415	2.241	0.1045	0.0045	0.01566	0.00047	0.2323	100.8	4.2	100.2	3	148	67	100.2	3	0.595238
16To_09_131.FIN2	471.7	2.81	0.2506	0.01	0.03567	0.0011	0.39678	226.8	8.1	225.9	6.9	250	65	225.9	6.9	0.396825
16To_09_132.FIN2	95.1	1.308	0.197	0.014	0.02472	0.0008	0.35301	183	12	157.4	5	430	120	157.4	5	13.9891
16To_09_133.FIN2	500	1.29	1.8	0.068	0.1816	0.0054	0.67937	1044.9	25	1076	29	1018	52	1018	52	5.69745	Rim
16To_09_133.FIN2	182.4	2.031	2.295	0.088	0.2116	0.0062	0.64492	1211	27	1237	33	1162	52	1162	52	6.45439	Core
16To_09_136.FIN2	189.9	0.755	0.891	0.034	0.10582	0.003	0.16748	647.9	17	648.9	17	627	56	648.9	17	0.154345
16To_09_138.FIN2	429.7	0.727	0.1753	0.0082	0.02413	0.00091	0.63536	163.8	7.1	153.7	5.7	304	76	153.7	5.7	6.16606
16To_09_139.FIN2	617	1.611	0.1928	0.0073	0.02837	0.00084	0.54196	178.9	6.2	180.3	5.2	157	58	180.3	5.2	0.78256
16TO10_1.FIN2	282	1.17	0.1928	0.0075	0.02764	0.00047	0.11327	178.5	6.4	175.7	3	207	81	175.7	3	1.56863
16TO10_2.FIN2	1152	0.952	0.0796	0.0023	0.01175	0.0002	0.29545	77.7	2.2	75.32	1.3	148	60	75.32	1.3	3.06306
16TO10_3.FIN2	343	1.264	0.0712	0.0036	0.01132	0.00021	0.026687	69.7	3.4	72.6	1.3	6	93	72.6	1.3	4.16069
16TO10_4.FIN2	110.2	2.03	1.848	0.045	0.1742	0.0026	0.30281	1060	16	1034.9	14	1102	50	1102	50	6.08893
16TO10_5.FIN2	515.3	0.4847	0.539	0.015	0.0708	0.0013	0.3007	437.1	9.9	441.1	7.9	420	67	441.1	7.9	0.915122
16TO10_6.FIN2	463	1.373	0.213	0.012	0.02457	0.00054	0.26899	195.7	10	156.5	3.4	690	120	DISC	DISC	20.0307
16TO10_7.FIN2	287	2.065	0.3164	0.0099	0.04231	0.00065	0.16149	278.5	7.6	267.1	4.1	360	69	267.1	4.1	4.09336
16TO10_8.FIN2	63.5	1.923	2.921	0.083	0.2397	0.0043	0.51783	1384	22	1384	23	1403	49	1403	49	1.35424
16TO10_9.FIN2	207	1.036	0.581	0.018	0.0734	0.0015	0.33202	464.8	11	456.5	8.9	487	69	456.5	8.9	1.78571
16TO10_10.FIN2	480	0.927	0.063	0.0044	0.00926	0.00034	0.47661	62.8	3.9	59.4	2.2	180	120	59.4	2.2	5.41401
16TO10_12.FIN2	391	2.406	0.0804	0.0034	0.0126	0.00022	0.10257	78.3	3.2	80.7	1.4	46	80	80.7	1.4	3.06513
16TO10_15.FIN2	123.6	1.808	4.035	0.093	0.2876	0.0055	0.67196	1638	19	1631	27	1659	39	1659	39	1.68776
16TO10_16.FIN2	127.7	0.726	1.288	0.046	0.1377	0.0037	0.7207	836	21	831	21	862	58	831	21	0.598086
16TO10_17.FIN2	293	1.432	4.227	0.088	0.3012	0.0047	0.78267	1679	17	1696	23	1668	34	1668	34	1.67866
16TO10_18.FIN2	208.5	1.296	0.122	0.012	0.01551	0.00068	0.23274	117	11	99.2	4.3	470	240	DISC	DISC	15.2137
16TO10_20.FIN2	528	1.076	0.0822	0.0031	0.01237	0.00021	0.086898	80.1	2.9	79.2	1.3	123	76	79.2	1.3	1.1236
16TO10_21.FIN2	368	1.118	0.1829	0.0055	0.02659	0.00045	0.13268	170.3	4.7	169.2	2.9	204	66	169.2	2.9	0.645919
16TO10_22.FIN2	430.9	1.86	0.41	0.01	0.05395	0.00079	0.30265	348.3	7.5	338.7	4.8	418	56	338.7	4.8	2.75624
16TO10_24.FIN2	636	1.804	0.0929	0.0033	0.01358	0.00023	0.20085	90.1	3	86.9	1.4	206	74	86.9	1.4	3.55161
16TO10_26.FIN2	727	2.822	0.0791	0.0027	0.01235	0.0002	0.0082126	77.2	2.6	79.1	1.3	65	71	79.1	1.3	2.46114
16TO10_27.FIN2	462	4	4.079	0.086	0.2827	0.0046	0.77141	1648	17	1604	23	1735	35	1735	35	7.55043
16TO10_28.FIN2	637	1.999	0.0759	0.0035	0.01142	0.0003	0.040071	74.2	3.3	73.2	1.9	144	100	73.2	1.9	1.34771
16TO10_29.FIN2	103.3	1.313	5.292	0.11	0.3356	0.0048	0.46372	1865	18	1865	23	1884	37	1884	37	1.00849
16TO10_30.FIN2	765	0.916	0.1812	0.0046	0.02607	0.00038	0.12463	168.9	3.9	165.9	2.4	231	56	165.9	2.4	1.7762
16TO10_31.FIN2	201	3.229	7.24	0.19	0.3998	0.0097	0.61283	2135	24	2164	44	2128	43	2128	43	1.69173
16TO10_32.FIN2	489	1.805	0.0798	0.003	0.01159	0.00019	0.066745	77.8	2.8	74.31	1.2	205	81	74.31	1.2	4.48586
16TO10_33.FIN2	92.1	2.146	3.253	0.075	0.2539	0.0039	0.59082	1469	18	1458	20	1505	43	1505	43	3.12292
16TO10_34.FIN2	398	1.166	0.3001	0.0086	0.04216	0.00068	0.32009	265.9	6.7	266.2	4.2	281	60	266.2	4.2	0.112824
16TO10_35.FIN2	51.1	1.909	0.097	0.011	0.01466	0.00048	0.047401	95	11	93.8	3	60	190	93.8	3	1.26316
16TO10_36.FIN2	132.3	1.11	0.0975	0.0067	0.01287	0.00037	0.085662	94.1	6.2	82.5	2.4	390	140	82.5	2.4	12.3273
16TO10_37.FIN2	146.8	1.547	0.2056	0.009	0.02992	0.00061	0.08347	188.9	7.6	190	3.8	206	91	190	3.8	0.582319
16TO10_38.FIN2	400	3.81	1.597	0.033	0.1609	0.0024	0.5266	968.8	13	961.4	13	1011	42	1011	42	4.90603
16TO10_39.FIN2	188.9	1.796	0.0843	0.0051	0.01153	0.00027	0.001583	81.8	4.7	73.9	1.7	300	120	73.9	1.7	9.6577
16TO10_40.FIN2	215	1.931	0.2692	0.0094	0.04	0.00067	0.050432	242.1	7.8	252.8	4.2	179	75	252.8	4.2	4.41966
16TO10_41.FIN2	301	2.524	0.0792	0.0061	0.012	0.00041	0.15931	77.2	5.7	76.9	2.6	150	150	76.9	2.6	0.388601
16TO10_42.FIN2	467	3.35	0.0595	0.0027	0.00924	0.00021	0.051055	58.6	2.6	59.3	1.3	79	87	59.3	1.3	1.19454
16TO10_43.FIN2	285	2.14	0.2473	0.0091	0.03627	0.00056	0.22106	223.6	7.4	229.7	3.5	198	74	229.7	3.5	2.72809
16TO10_44.FIN2	261	1.77	2.232	0.045	0.205	0.0029	0.35819	1189.9	14	1201.9	15	1190	41	1190	41	1
16TO10_46.FIN2	325	0.982	3.123	0.073	0.2385	0.0043	0.6735	1435	18	1378	22	1548	39	1548	39	10.9819
16TO10_47.FIN2	522	2.561	0.0596	0.0026	0.00938	0.00016	0.064572	58.7	2.5	60.21	1	52	82	60.21	1	2.5724
16TO10_48.FIN2	291	4.27	2.899	0.056	0.2392	0.0034	0.46536	1382.6	15	1384	18	1406	37	1406	37	1.56472
16TO10_49.FIN2	421	1.234	0.1807	0.0055	0.02656	0.00042	0.13932	168.4	4.7	168.9	2.6	193	65	168.9	2.6	0.296912
16TO10_50.FIN2	82.7	1.398	1.859	0.054	0.1783	0.0038	0.60305	1062	19	1059	20	1100	51	1100	51	3.72727
16TO10_51.FIN2	489	1.95	0.1024	0.0067	0.01415	0.00038	0.18964	98.8	6.1	90.6	2.4	310	130	90.6	2.4	8.2996	Rim
16TO10_51.FIN2	451	3.12	2.608	0.063	0.2144	0.0038	0.78759	1301	18	1252	20	1407	39	1407	39	11.0163	Core
16TO10_52.FIN2	235	1.533	1.964	0.04	0.1886	0.0026	0.36822	1101.8	14	1113.5	14	1094	41	1094	41	1.78245
16TO10_53.FIN2	349	1.263	0.0946	0.0043	0.01396	0.00027	0.13697	91.5	4	89.3	1.7	169	89	89.3	1.7	2.40437
16TO10_54.FIN2	118.5	1.185	0.211	0.011	0.02976	0.00063	0.21856	193.1	9.3	189	3.9	245	100	189	3.9	2.12325
16TO10_55.FIN2	348	1.292	2.998	0.056	0.2454	0.0031	0.39242	1406.2	14	1414.3	16	1415	37	1415	37	0.04947
16TO10_56.FIN2	96.7	1.101	0.495	0.017	0.0642	0.0015	0.2566	406	11	401	8.9	451	74	401	8.9	1.23153
16TO10_57.FIN2	110.3	1.139	0.125	0.0079	0.01578	0.00041	0.074392	118.8	7.1	100.9	2.6	450	130	DISC	DISC	15.0673
16TO10_58.FIN2	165	0.659	0.185	0.011	0.02703	0.0007	0.12803	171.3	9.1	171.9	4.4	210	120	171.9	4.4	0.350263
16TO10_59.FIN2	431	1.064	0.1875	0.0068	0.02718	0.00051	0.24619	174.2	5.8	172.8	3.2	207	76	172.8	3.2	0.803674
16TO10_60.FIN2	377	1.777	0.0809	0.0038	0.01178	0.00025	0.2091	78.8	3.6	75.5	1.6	200	95	75.5	1.6	4.18782
16TO10_61.FIN2	292	2.59	4.461	0.082	0.3052	0.004	0.48821	1722.8	15	1717	20	1742	34	1742	34	1.43513
16TO10_62.FIN2	260.2	0.7884	0.1119	0.005	0.01567	0.00029	0.077518	107.4	4.6	100.2	1.8	274	97	100.2	1.8	6.70391
16TO10_63.FIN2	566	0.777	0.1682	0.0053	0.02375	0.0004	0.19049	157.6	4.6	151.3	2.5	253	66	151.3	2.5	3.99746
16TO10_64.FIN2	152	1.596	0.0768	0.0048	0.01183	0.00028	1.4433e-05	74.8	4.5	75.8	1.8	90	120	75.8	1.8	1.3369
16TO10_65.FIN2	466	1.634	0.0953	0.0041	0.01457	0.00029	0.15904	92.2	3.8	93.3	1.9	91	82	93.3	1.9	1.19306
16TO10_66.FIN2	74.4	0.964	20.52	0.45	0.5823	0.0096	0.76479	3112	21	2959	40	3221	31	3221	31	8.13412
16TO10_67.FIN2	74	2.438	0.114	0.014	0.01486	0.00062	0.10883	108	12	95.1	3.9	350	230	95.1	3.9	11.9444	Rim
16TO10_67.FIN2	70.9	1.552	0.149	0.013	0.02266	0.00084	0.13152	140	12	144.4	5.3	130	180	144.4	5.3	3.14286	Core
16TO10_68.FIN2	764	1.037	0.0751	0.0027	0.01153	0.00021	0.095762	73.4	2.6	73.9	1.3	81	74	73.9	1.3	0.681199
16TO10_69.FIN2	377	2.466	0.1071	0.0045	0.0157	0.00028	0.17756	103	4.2	100.4	1.8	186	86	100.4	1.8	2.52427
16TO10_71.FIN2	366	2.955	4.407	0.098	0.2813	0.0046	0.88972	1711	19	1597	23	1853	34	1853	34	13.8154
16TO10_72.FIN2	71.4	1.204	2.061	0.052	0.1934	0.0032	0.32456	1134	18	1139	17	1116	53	1116	53	2.06093
16TO10_73.FIN2	127.4	1.577	0.205	0.0091	0.03015	0.00055	0.24858	188.4	7.6	191.4	3.4	151	84	191.4	3.4	1.59236
16TO10_74.FIN2	244	4.059	1.809	0.057	0.1708	0.0036	0.819	1043	20	1015	20	1089	45	1089	45	6.79522
16TO10_75.FIN2	890	2.84	0.0648	0.0021	0.00991	0.00015	0.015389	63.7	2	63.56	0.99	85	67	63.56	0.99	0.21978
16TO10_76.FIN2	638	1.902	0.1619	0.0046	0.02377	0.00037	0.24364	152.2	4	151.4	2.3	161	59	151.4	2.3	0.525624
16TO10_77.FIN2	758	1.01	11.22	0.22	0.4552	0.0071	0.92187	2542	19	2417	31	2642.2	29	2642.2	29	8.5232
16TO10_78.FIN2	360	2.144	0.0996	0.0039	0.01477	0.00025	0.22334	96.6	3.7	94.5	1.6	160	80	94.5	1.6	2.17391
16TO10_79.FIN2	206	1.459	0.1564	0.0067	0.02329	0.00042	0.12507	147	5.9	148.4	2.6	123	83	148.4	2.6	0.952381
16TO10_80.FIN2	433	1.844	0.1	0.0046	0.01496	0.00026	0.11978	96.5	4.2	95.7	1.7	141	95	95.7	1.7	0.829016
16TO10_81.FIN2	235.4	1.01	0.0877	0.0048	0.01277	0.00026	0.28882	85	4.5	81.8	1.7	162	100	81.8	1.7	3.76471
16TO10_82.FIN2	432	1.568	0.0881	0.0037	0.01292	0.0002	0.017522	85.9	3.5	82.75	1.3	171	86	82.75	1.3	3.66705
16TO10_83.FIN2	446	2.526	0.0626	0.0043	0.00926	0.00025	0.17366	62.4	4.3	59.4	1.6	160	140	59.4	1.6	4.80769
16TO10_84.FIN2	399	1.245	0.1862	0.0064	0.02699	0.00041	0.093111	172.9	5.5	171.7	2.6	184	72	171.7	2.6	0.694043
16TO10_85.FIN2	300	1.664	2.937	0.065	0.2419	0.0042	0.84171	1389	17	1396	22	1377	38	1377	38	1.37981
16TO10_86.FIN2	727	2.039	0.0821	0.0029	0.01259	0.0002	0.14008	80	2.7	80.63	1.3	69	70	80.63	1.3	0.7875
16TO10_87.FIN2	632	1.532	0.068	0.0024	0.0104	0.00016	0.25813	66.7	2.3	66.69	1	71	70	66.69	1	0.0149925
16TO10_88.FIN2	1410	4.57	0.1054	0.0036	0.0161	0.00027	0.13872	101.6	3.3	103	1.7	87	69	103	1.7	1.37795
16TO10_89.FIN2	74.8	1.374	4.491	0.11	0.3114	0.0047	0.52187	1726	20	1747	23	1689	43	1689	43	3.43398
16TO10_91.FIN2	388	5.5	1.587	0.046	0.1593	0.0034	0.92369	961	19	952	19	970	41	970	41	1.85567
16TO10_93.FIN2	373	1.09	0.0667	0.0028	0.00996	0.0002	0.1856	65.5	2.7	63.9	1.3	136	86	63.9	1.3	2.44275
16TO10_94.FIN2	279	1.64	3.727	0.075	0.2759	0.0043	0.64442	1575.6	16	1570	22	1569	36	1569	36	0.0637349
16TO10_95.FIN2	117.8	0.92	0.0766	0.0051	0.01144	0.00027	0.043455	74.6	4.8	73.3	1.7	130	130	73.3	1.7	1.74263
16TO10_96.FIN2	257	2.012	4.024	0.086	0.2843	0.0048	0.66575	1637	17	1612	24	1662	39	1662	39	3.00842
16TO10_97.FIN2	243.8	1.544	4.511	0.085	0.3073	0.0041	0.52376	1732.7	16	1727	20	1732	35	1732	35	0.288684
16TO10_98.FIN2	685	2.716	0.06	0.0022	0.00925	0.00015	0.02871	59.1	2.1	59.34	0.97	70	74	59.34	0.97	0.406091
16TO10_99.FIN2	58.9	0.7829	6.743	0.14	0.375	0.0052	0.43589	2077	18	2052	24	2092	37	2092	37	1.91205
16TO10_100.FIN2	370	1.174	0.0706	0.0032	0.01045	0.0002	0.13542	69.2	3	67	1.3	137	87	67	1.3	3.17919
16TO10_101.FIN2	146	0.846	2.946	0.062	0.2239	0.0033	0.46784	1393	16	1302	18	1527	39	1527	39	14.7348
16TO10_102.FIN2	113.9	0.876	0.0789	0.0088	0.01133	0.0004	0.042469	76.7	8.3	72.6	2.6	190	220	72.6	2.6	5.3455
16TO10_103.FIN2	116.1	1.412	0.1194	0.0077	0.01549	0.00041	0.13948	113.8	7	99.1	2.6	380	140	99.1	2.6	12.9174
16TO10_104.FIN2	138.3	0.7358	0.0763	0.0052	0.01167	0.00029	0.10005	74.3	4.9	74.8	1.9	60	120	74.8	1.9	0.672948
16TO10_105.FIN2	217	2.74	0.522	0.018	0.0627	0.0014	0.37063	424	12	392	8.7	589	75	392	8.7	7.54717
16TO10_106.FIN2	285	2.53	0.542	0.014	0.07039	0.001	0.078094	438.8	9.2	438.4	6	418	60	438.4	6	0.0911577
16TO10_107.FIN2	335	1.055	0.2408	0.0093	0.03361	0.0008	0.31276	218.6	7.6	213.1	5	261	82	213.1	5	2.51601
16TO10_108.FIN2	67.5	1.191	0.516	0.024	0.0672	0.0016	0.26554	423	17	419.1	9.4	408	100	419.1	9.4	0.921986
16TO10_110.FIN2	328	1.97	3.97	0.076	0.2771	0.004	0.47287	1626.9	16	1576	20	1684	36	1684	36	6.4133
16TO10_111.FIN2	300	0.929	0.202	0.011	0.02651	0.0005	0.041748	186.1	9.4	168.7	3.2	370	120	168.7	3.2	9.34981
16TO10_112.FIN2	172	2.354	1.837	0.043	0.1781	0.0027	0.47687	1057	15	1056	15	1041	47	1041	47	1.44092
16TO10_113.FIN2	364	2.691	0.0893	0.0041	0.01355	0.00026	0.13446	86.6	3.8	86.7	1.6	91	89	86.7	1.6	0.115473
16TO10_114.FIN2	655	1.627	0.1099	0.0035	0.01634	0.00028	0.042747	105.8	3.2	104.5	1.8	141	69	104.5	1.8	1.22873
16TO10_116.FIN2	483	1.696	0.2515	0.0069	0.03602	0.00063	0.14965	227.4	5.6	228.1	3.9	202	61	228.1	3.9	0.307828
16TO10_117.FIN2	206	1.497	0.0798	0.0044	0.01186	0.00026	0.048335	77.6	4.1	76	1.7	130	110	76	1.7	2.06186
16TO10_118.FIN2	299	1.464	0.0943	0.0043	0.01386	0.00026	0.10216	91.2	4	88.8	1.6	157	91	88.8	1.6	2.63158
16TO10_119.FIN2	717	2.554	0.4055	0.0089	0.05538	0.0008	0.33612	345.3	6.4	347.8	5	311	50	347.8	5	0.724008
16TO10_120.FIN2	322.9	1.873	0.1013	0.0045	0.01459	0.00035	0.18935	97.7	4.1	93.3	2.2	190	90	93.3	2.2	4.50358
16TO10_121.FIN2	163.3	1.089	0.081	0.013	0.01154	0.0005	0.15854	79	12	74	3.2	160	280	74	3.2	6.32911
16TO10_122.FIN2	1290	2.192	0.085	0.003	0.01203	0.00022	0.17482	82.8	2.8	77.1	1.4	237	76	77.1	1.4	6.88406
16TO10_123.FIN2	178.6	1.063	0.096	0.0049	0.01423	0.00031	0.077246	92.7	4.6	91.1	2	135	100	91.1	2	1.726
16TO10_124.FIN2	380	2.267	0.0842	0.0039	0.01213	0.00024	0.24641	81.9	3.6	77.7	1.6	191	92	77.7	1.6	5.12821
16TO10_125.FIN2	381	1.709	0.0736	0.0036	0.01075	0.00024	0.09465	71.9	3.4	68.9	1.5	182	100	68.9	1.5	4.17246
16TO10_126.FIN2	122.2	1.538	0.085	0.0067	0.01366	0.00033	0.13009	82.2	6.2	87.5	2.1	-40	130	87.5	2.1	6.44769
16TO10_127.FIN2	95.8	1.093	13.65	0.26	0.5284	0.0078	0.56434	2724.2	18	2736	34	2712	32	2712	32	0.884956
16TO10_128.FIN2	218.3	2.065	3.01	0.062	0.2455	0.0036	0.55406	1408.5	16	1415	18	1384	38	1384	38	2.23988
16TO10_129.FIN2	442	0.6049	0.1745	0.0058	0.02586	0.00038	0.027568	163	5	164.6	2.4	143	70	164.6	2.4	0.981595
16TO10_130.FIN2	137.2	1.029	4.494	0.087	0.3112	0.0044	0.47625	1728.4	16	1746	21	1702	36	1702	36	2.58519
16TO10_131.FIN2	98.6	1.149	0.856	0.025	0.1017	0.0016	0.19419	626	14	625.3	9.4	608	65	625.3	9.4	0.111821
16TO10_133.FIN2	133.1	2.75	0.0943	0.0079	0.01366	0.00042	0.20838	90.9	7.3	87.4	2.7	160	150	87.4	2.7	3.85039
16TO10_134.FIN2	255	2.011	0.1746	0.0071	0.02466	0.00046	0.046042	163.5	6.2	157	2.9	247	86	157	2.9	3.97554
16TO10_135.FIN2	180.1	2.118	0.1471	0.0066	0.02182	0.00042	0.11896	138.8	5.8	139.1	2.7	143	88	139.1	2.7	0.216138
16TO10_136.FIN2	96.2	0.856	0.127	0.012	0.01236	0.00057	0.27107	120	11	79.2	3.6	1010	210	DISC	DISC	34
16TO10_138.FIN2	100.2	2.17	3.512	0.11	0.2645	0.0072	0.83276	1520	27	1509	37	1556	43	1556	43	3.02057
16TO10_139.FIN2	211.5	1.026	0.1053	0.0057	0.01611	0.00035	0.10639	101.2	5.2	103	2.2	100	110	103	2.2	1.77866
16TO10_140.FIN2	224.1	0.7355	0.1946	0.0077	0.02793	0.00046	0.022011	179.9	6.5	177.6	2.9	229	82	177.6	2.9	1.27849
16TO-11_1.FIN2	586	1.584	0.0786	0.0044	0.01193	0.00044	0.14483	76.7	4.1	76.4	2.8	160	120	76.4	2.8	0.391134
16TO-11_2.FIN2	408	0.845	0.1834	0.0075	0.0245	0.00056	0.26536	170.6	6.5	156	3.5	355	87	156	3.5	8.55803
16TO-11_3.FIN2	526	1.89	0.0919	0.0035	0.01403	0.00033	0.22639	89.2	3.3	90	2.1	79	72	90	2.1	0.896861
16TO-11_4.FIN2	207	1.93	0.055	0.0046	0.00918	0.00027	0.2557	54.2	4.4	58.9	1.7	-40	140	58.9	1.7	8.67159
16TO-11_5.FIN2	224.2	1.424	0.273	0.0093	0.03923	0.00083	0.18143	245.5	7.6	248	5.2	219	75	248	5.2	1.01833
16TO-11_6.FIN2	81.5	0.714	3.213	0.08	0.2524	0.0067	0.52265	1458	19	1450	34	1483	40	1483	40	2.22522
16TO-11_7.FIN2	338.5	1.144	0.0969	0.0043	0.01351	0.00033	0.14235	93.8	4	86.5	2.1	290	94	86.5	2.1	7.78252
16TO-11_8.FIN2	219.8	2.42	3.9	0.17	0.266	0.013	0.70106	1617	38	1521	66	1709	52	1709	52	11.0006
16TO-11_9.FIN2	587	1.949	0.2923	0.0089	0.04124	0.0011	0.17887	260.1	7	260.5	6.6	269	73	260.5	6.6	0.153787
16TO-11_10.FIN2	520	1.207	0.2307	0.0065	0.0344	0.00085	0.41207	211	5.4	218	5.3	144	56	218	5.3	3.31754
16TO-11_11.FIN2	210.1	1.507	0.1599	0.0067	0.02333	0.00057	0.13602	151.2	5.9	148.7	3.6	172	80	148.7	3.6	1.65344
16TO-11_12.FIN2	178.5	1.65	3.045	0.075	0.2464	0.0068	0.56309	1415	19	1418	35	1386	44	1386	44	2.3088
16TO-11_13.FIN2	441	2.186	0.0742	0.003	0.01128	0.00025	0.22085	73.1	2.9	72.3	1.6	112	76	72.3	1.6	1.09439
16TO-11_14.FIN2	389	0.958	0.59	0.014	0.0758	0.0016	0.23035	470.1	8.6	470.6	9.5	448	53	470.6	9.5	0.10636
16TO-11_15.FIN2	335.8	1.036	0.193	0.0076	0.02788	0.00057	0.041967	178.8	6.4	177.3	3.6	194	86	177.3	3.6	0.838926
16TO-11_16.FIN2	202.4	1.828	3.116	0.067	0.2486	0.0049	0.57998	1435	16	1431	25	1462	33	1462	33	2.12038
16TO-11_17.FIN2	265	2.74	0.0807	0.0054	0.01277	0.0005	0.16563	78.7	5.1	81.8	3.2	110	120	81.8	3.2	3.93901
16TO-11_18.FIN2	565	3.79	0.554	0.013	0.0717	0.0016	0.45308	447.5	8.6	446.3	9.7	453	48	446.3	9.7	0.268156
16TO-11_19.FIN2	278.7	2.136	0.0846	0.0038	0.01257	0.00032	0.21575	82.3	3.6	80.5	2	113	90	80.5	2	2.18712
16TO-11_20.FIN2	321	2.405	0.0925	0.0038	0.01385	0.00037	0.13516	90	3.6	88.7	2.3	105	82	88.7	2.3	1.44444
16TO-11_21.FIN2	813	3.42	0.0956	0.004	0.01416	0.00042	0.31759	92.6	3.7	90.6	2.6	127	85	90.6	2.6	2.15983	Rim
16TO-11_21.FIN2	596	1.956	0.1629	0.0085	0.02395	0.00073	0.048659	153.1	7.4	152.6	4.6	150	130	152.6	4.6	0.326584	Core
16TO-11_22.FIN2	137.7	1.841	0.0934	0.0054	0.01425	0.00038	0.12828	90.8	5	91.2	2.4	70	110	91.2	2.4	0.440529
16TO-11_23.FIN2	331	1.863	0.0868	0.004	0.01309	0.00037	0.14343	84.3	3.8	83.8	2.3	99	86	83.8	2.3	0.59312
16TO-11_24.FIN2	198	1.614	3.186	0.076	0.2527	0.0056	0.56255	1454	18	1451	29	1466	36	1466	36	1.02319
16TO-11_25.FIN2	297	1.496	0.459	0.013	0.0618	0.0017	0.2498	383.7	8.8	386.6	10	331	70	386.6	10	0.755799
16TO-11_26.FIN2	203.7	1.512	3.011	0.067	0.2437	0.0057	0.57665	1409	17	1408	30	1392	38	1392	38	1.14943
16TO-11_27.FIN2	392	3.09	0.0882	0.0047	0.01265	0.00041	0.34687	85.6	4.4	81	2.6	158	100	81	2.6	5.37383
16TO-11_28.FIN2	604	1.386	0.0878	0.004	0.01278	0.00035	0.21724	85.8	3.7	81.9	2.2	156	88	81.9	2.2	4.54545
16TO-11_29.FIN2	422.7	1.692	0.2509	0.0073	0.03544	0.00072	0.20931	227.6	5.8	224.5	4.5	242	61	224.5	4.5	1.36204
16TO-11_30.FIN2	155.9	1.836	0.0996	0.0061	0.01543	0.00041	0.14315	96.5	5.7	98.7	2.6	80	110	98.7	2.6	2.27979
16TO-11_31.FIN2	213	1.262	0.565	0.014	0.07252	0.0013	0.19622	454.9	9.5	451.3	8	455	52	451.3	8	0.791383
16TO-11_32.FIN2	749	5.11	0.625	0.019	0.0791	0.0023	0.69429	494	12	491	13	521	48	491	13	0.607287
16TO-11_33.FIN2	149.6	0.312	0.187	0.0099	0.02565	0.0007	0.11399	174	8.6	163.2	4.4	260	110	163.2	4.4	6.2069
16TO-11_34.FIN2	370	4.65	0.0866	0.0038	0.01253	0.00028	0.23628	84.2	3.6	80.3	1.8	176	83	80.3	1.8	4.63183
16TO-11_36.FIN2	232	0.954	0.394	0.012	0.05367	0.001	0.0066128	337.5	9.1	337	6.3	334	70	337	6.3	0.148148
16TO-11_37.FIN2	483	2.64	4.306	0.093	0.2954	0.0068	0.56614	1693	18	1668	34	1734	34	1734	34	3.80623
16TO-11_38.FIN2	202.8	0.791	0.1858	0.0077	0.02687	0.0007	0.088076	174.3	6.9	170.9	4.4	210	94	170.9	4.4	1.95066
16TO-11_39.FIN2	105.6	1.542	0.291	0.011	0.04057	0.00089	0.023265	262.5	9.1	256.3	5.5	282	83	256.3	5.5	2.3619
16TO-11_40.FIN2	264.6	1.901	0.0946	0.0049	0.0143	0.00037	0.20169	91.5	4.5	91.5	2.3	139	100	91.5	2.3	0
16TO-11_41.FIN2	311	1.435	0.1011	0.0047	0.01499	0.00034	0.14021	97.6	4.3	96.1	2.1	151	90	96.1	2.1	1.53689
16TO-11_42.FIN2	188.7	0.912	0.561	0.02	0.0713	0.0019	0.22944	451	13	444.1	11	499	79	444.1	11	1.52993
16TO-11_43.FIN2	401	1.86	0.58	0.014	0.0741	0.0015	0.39618	463.5	8.9	461	9.2	457	49	461	9.2	0.539374
16TO-11_44.FIN2	292	1.412	0.292	0.0097	0.03995	0.00082	0.22444	259.4	7.6	252.5	5.1	304	69	252.5	5.1	2.65998
16TO-11_45.FIN2	53.5	1.347	0.179	0.013	0.02592	0.00093	0.19548	167	11	164.9	5.8	200	140	164.9	5.8	1.25749
16TO-11_46.FIN2	155	1.751	0.0919	0.0062	0.01268	0.00038	0.21185	89	5.8	81.2	2.4	300	130	81.2	2.4	8.76404
16TO-11_47.FIN2	120	1.289	4.34	0.14	0.3022	0.0087	0.45586	1702	25	1701	43	1733	51	1733	51	1.84651
16TO-11_48.FIN2	207.6	1.878	0.0918	0.0051	0.01421	0.00041	0.033716	89.5	4.7	91	2.6	50	110	91	2.6	1.67598
16TO-11_49.FIN2	700	1.326	0.1908	0.0055	0.02699	0.00057	0.30496	177.1	4.7	171.7	3.6	275	60	171.7	3.6	3.04912
16TO-11_50.FIN2	842	2.95	0.1111	0.0039	0.01614	0.00051	0.41286	106.8	3.5	103.2	3.2	181	69	103.2	3.2	3.37079
16TO-11_51.FIN2	179	1.011	4.33	0.14	0.301	0.011	0.5552	1692	27	1692	54	1685	56	1685	56	0.41543
16TO-11_52.FIN2	96.1	1.62	4.048	0.11	0.2849	0.0064	0.49919	1642	22	1616	32	1682	42	1682	42	3.9239
16TO-11_53.FIN2	640	1.989	0.0736	0.0027	0.01111	0.00026	0.17948	72.2	2.5	71.2	1.7	109	72	71.2	1.7	1.38504
16TO-11_54.FIN2	340	1.195	0.0803	0.0036	0.01228	0.00029	0.16493	78.6	3.4	78.7	1.8	69	87	78.7	1.8	0.127226
16TO-11_55.FIN2	273	2.809	0.544	0.013	0.06976	0.0014	0.29488	440.2	8.3	434.6	8.6	477	51	434.6	8.6	1.27215
16TO-11_56.FIN2	544	10.8	0.511	0.015	0.0673	0.0017	0.39607	418.2	9.8	419.5	10	393	61	419.5	10	0.310856
16TO-11_57.FIN2	287.1	2.829	0.299	0.01	0.0413	0.0011	0.38249	264.8	7.9	260.8	7.1	317	73	260.8	7.1	1.51057
16TO-11_58.FIN2	340.1	2.069	0.0812	0.0042	0.01171	0.00034	0.19086	79.2	3.9	75.1	2.1	210	110	75.1	2.1	5.17677
16TO-11_59.FIN2	181.1	1.799	0.0943	0.006	0.01427	0.0004	0.27465	91.7	5.5	91.6	2.6	100	110	91.6	2.6	0.109051
16TO-11_60.FIN2	122.9	1.581	0.252	0.017	0.0349	0.0013	0.36242	227	13	221.2	7.9	260	130	221.2	7.9	2.55507
16TO-11_61.FIN2	464	1.294	0.0565	0.0025	0.00856	0.00023	0.1207	55.7	2.4	55	1.5	114	86	55	1.5	1.25673
16TO-11_62.FIN2	917	2.312	1.89	0.046	0.1803	0.0045	0.58545	1078	16	1068	25	1107	46	1107	46	3.52304
16TO-11_63.FIN2	738	17.47	0.5452	0.012	0.0704	0.0015	0.41659	441.9	7.9	438.5	8.9	446	47	438.5	8.9	0.769405
16TO-11_64.FIN2	574	1.033	0.1718	0.0065	0.02522	0.00073	0.51673	161.3	5.7	160.5	4.6	160	69	160.5	4.6	0.49597
16TO-11_65.FIN2	94.5	1.493	4.31	0.12	0.3012	0.0081	0.5239	1692	24	1696	40	1698	50	1698	50	0.117786
16TO-11_66.FIN2	459	1.77	0.1196	0.006	0.0153	0.00049	0.33385	114.5	5.5	97.9	3.1	414	100	97.9	3.1	14.4978
16TO-11_68.FIN2	294.9	2.694	0.1139	0.0049	0.01654	0.00046	0.26038	109.3	4.4	105.7	2.9	168	91	105.7	2.9	3.29369
16TO-11_69.FIN2	68.2	2.065	7.1	0.19	0.3981	0.011	0.42048	2120	23	2163	49	2117	43	2117	43	2.17289
16TO-11_70.FIN2	222.1	1.297	0.1605	0.0073	0.0227	0.00071	0.33429	150.6	6.4	144.7	4.4	218	89	144.7	4.4	3.91766
16TO-11_71.FIN2	512	5.04	0.0708	0.0034	0.01064	0.00032	0.34447	69.9	3.2	68.2	2	83	77	68.2	2	2.43205
16TO-11_72.FIN2	249.6	1.771	0.2795	0.0097	0.03953	0.0011	0.46825	252.2	7.5	249.8	6.8	275	65	249.8	6.8	0.951626
16TO-11_73.FIN2	223	1.597	0.0713	0.0043	0.01048	0.00028	0.15705	69.7	4.1	67.2	1.8	140	110	67.2	1.8	3.5868
16TO-11_74.FIN2	257	1.46	0.2714	0.009	0.03872	0.00089	0.38175	244.4	7	244.8	5.6	232	64	244.8	5.6	0.163666
16TO-11_75.FIN2	95.6	1.571	0.179	0.012	0.02402	0.00077	0.14074	167	10	153	4.9	290	140	153	4.9	8.38323
16TO-11_76.FIN2	140.1	1.117	2.985	0.068	0.2422	0.0053	0.6232	1402	17	1399	28	1405	36	1405	36	0.427046
16TO-11_77.FIN2	351.3	0.908	0.1812	0.0066	0.02607	0.00058	0.2971	169.1	5.6	165.9	3.7	203	73	165.9	3.7	1.89237
16TO-11_78.FIN2	198.6	1.531	0.0847	0.0042	0.01298	0.00036	0.12849	82.3	3.9	83.1	2.3	45	97	83.1	2.3	0.972053
16TO-11_79.FIN2	279	3.3	0.0926	0.0072	0.01417	0.0008	0.47417	89.2	6.5	90.7	5.1	10	110	90.7	5.1	1.68161
16TO-11_80.FIN2	999	1.169	0.0797	0.0022	0.01191	0.00025	0.3383	77.8	2.1	76.3	1.6	120	57	76.3	1.6	1.92802
16TO-11_81.FIN2	174	2.473	0.0873	0.0052	0.01359	0.00043	0.13933	84.6	4.8	87	2.8	0	110	87	2.8	2.83688
16TO-11_82.FIN2	417	2.653	3.019	0.071	0.2446	0.0059	0.57052	1414	18	1411	30	1411	37	1411	37	0
16TO-11_83.FIN2	243	1.691	0.0887	0.005	0.014	0.00042	0.17493	86.4	4.6	89.6	2.7	40	100	89.6	2.7	3.7037
16TO-11_84.FIN2	187	2.732	0.084	0.0052	0.01251	0.00034	0.098075	81.5	4.9	80.1	2.2	160	120	80.1	2.2	1.71779
16TO-11_85.FIN2	643	1.524	0.0844	0.0035	0.01204	0.00028	0.20513	82.2	3.3	77.2	1.8	217	91	77.2	1.8	6.08273
16TO-11_86.FIN2	160	1.216	0.0746	0.0051	0.01038	0.00033	0.050107	72.8	4.8	66.6	2.1	230	140	66.6	2.1	8.51648
16TO-11_88.FIN2	170	2.85	0.351	0.034	0.0434	0.0032	0.36786	306	24	273	20	620	160	273	20	10.7843
16TO-11_89.FIN2	99	1.85	0.1059	0.0083	0.01603	0.00049	0.15472	101.4	7.6	102.5	3.1	90	140	102.5	3.1	1.08481
16TO-11_90.FIN2	320	1.751	2.961	0.064	0.2435	0.0056	0.54806	1399	17	1406	30	1385	38	1385	38	1.51625
16TO-11_91.FIN2	105.2	1.972	0.0846	0.0074	0.01295	0.00047	0.29492	82.7	7.1	82.9	3	110	150	82.9	3	0.241838
16TO-11_92.FIN2	178.2	1.956	3.76	0.13	0.274	0.011	0.65324	1580	28	1569	56	1601	60	1601	60	1.99875
16TO-11_95.FIN2	104.4	4.65	0.114	0.011	0.01536	0.00075	0.30189	109.1	9.7	98.3	4.8	350	180	98.3	4.8	9.89918
16TO-11_96.FIN2	182	1.289	0.0768	0.005	0.01183	0.00036	0.14289	75.3	4.8	75.8	2.3	10	120	75.8	2.3	0.664011
16TO-11_97.FIN2	384	1.944	0.1952	0.0068	0.02776	0.0006	0.29467	180.6	5.8	176.5	3.8	224	72	176.5	3.8	2.27021
16TO-11_98.FIN2	36.4	1.975	1.752	0.09	0.1597	0.0048	0.10995	1020	34	958	27	1180	110	1180	110	18.8136
16TO-11_100.FIN2	37.9	1.151	12.92	0.37	0.514	0.014	0.49222	2672	27	2670	59	2664	39	2664	39	0.225225
16TO-11_101.FIN2	209	0.502	0.1122	0.0077	0.01535	0.00062	0.5024	107.8	7	98.2	3.9	320	150	98.2	3.9	8.90538
16TO-11_102.FIN2	317	1.699	0.0765	0.0049	0.01175	0.00033	0.059455	74.7	4.6	75.3	2.1	-10	120	75.3	2.1	0.803213
16TO-11_103.FIN2	166.8	2.092	2.085	0.049	0.195	0.004	0.40707	1145	16	1148	22	1146	41	1146	41	0.17452
16TO-11_104.FIN2	900	11.91	1.815	0.036	0.1727	0.0032	0.61754	1050.4	13	1027	18	1072	32	1072	32	4.19776
16TO-11_106.FIN2	440	1.188	0.0789	0.004	0.01188	0.00033	0.16399	77	3.7	76.1	2.1	140	110	76.1	2.1	1.16883
16TO-11_109.FIN2	300	1.753	0.597	0.014	0.0753	0.0015	0.38874	475.2	8.9	467.7	9.1	494	46	467.7	9.1	1.57828
16TO-11_110.FIN2	156.8	1.242	0.163	0.012	0.01764	0.00065	0.20983	153	10	112.7	4.1	880	150	DISC	DISC	26.3399
16TO-11_111.FIN2	132.8	2.096	0.1111	0.0072	0.01525	0.00043	0.02206	106.3	6.6	97.6	2.7	300	130	97.6	2.7	8.18438
16TO-11_112.FIN2	113.8	2.091	0.521	0.027	0.0664	0.0028	0.41309	425	18	414	17	410	110	414	17	2.58824
16TO-11_113.FIN2	205	2.501	0.1043	0.0058	0.01493	0.00039	0.1198	100.5	5.4	95.6	2.5	220	110	95.6	2.5	4.87562
16TO-11_114.FIN2	475	3.89	0.1009	0.0044	0.01498	0.00039	0.2465	97.4	4	95.8	2.5	131	81	95.8	2.5	1.64271
16TO-11_115.FIN2	384	1.641	0.0896	0.0043	0.01349	0.00035	0.065833	86.9	4	86.4	2.2	128	94	86.4	2.2	0.575374
16TO-11_116.FIN2	479	5.71	0.36	0.029	0.0435	0.0026	0.2117	311	21	274	16	580	180	274	16	11.8971	Rim
16TO-11_116.FIN2	368.4	9.01	3.37	0.11	0.2588	0.0086	0.7127	1493	25	1481	44	1537	47	1537	47	3.64346	Core
16TO-11_117.FIN2	232.5	1.225	0.0939	0.006	0.01247	0.00037	0.18962	91.5	5.6	79.9	2.4	410	130	79.9	2.4	12.6776
16TO-11_118.FIN2	366	4.69	0.2314	0.0082	0.03396	0.00085	0.17705	210.9	6.8	215.2	5.3	204	73	215.2	5.3	2.03888
16TO-11_119.FIN2	862	10.11	3.876	0.094	0.27	0.0066	0.61713	1608	19	1539	34	1679	37	1679	37	8.3383
16TO-11_120.FIN2	153.5	1.483	0.1125	0.0094	0.01428	0.00067	0.33827	107.7	8.5	91.4	4.3	520	160	DISC	DISC	15.1346
16TO-11_121.FIN2	213.9	1.746	0.0898	0.0066	0.01171	0.00037	0.10777	87	6.1	75.1	2.4	360	150	75.1	2.4	13.6782
16TO-11_122.FIN2	200.2	1.183	0.189	0.012	0.0221	0.0011	0.3225	180	11	141.1	6.8	730	130	DISC	DISC	21.6111
16TO-11_123.FIN2	182.3	1.299	0.089	0.01	0.01273	0.00069	0.049809	85.9	9.6	81.6	4.4	280	250	81.6	4.4	5.00582
16TO-11_124.FIN2	709	1.427	0.0876	0.0029	0.01316	0.00033	0.35984	85.1	2.7	84.3	2.1	110	61	84.3	2.1	0.940071
16TO-11_125.FIN2	279	2.057	0.0988	0.0053	0.01511	0.00035	0.07264	95.3	4.8	96.7	2.3	88	100	96.7	2.3	1.46905
16TO-11_126.FIN2	269	1.278	0.28	0.011	0.03545	0.00092	0.12741	251.2	9	224.5	5.7	488	89	224.5	5.7	10.629
16TO-11_127.FIN2	87.6	0.729	0.838	0.036	0.0975	0.0025	0.15097	620	20	599	15	682	97	599	15	3.3871
16TO-11_128.FIN2	76.8	1.911	0.0772	0.0074	0.01252	0.00063	0.10841	75.6	6.9	80.2	4	10	170	80.2	4	6.08466
16TO-11_129.FIN2	212.7	1.534	0.0662	0.005	0.01016	0.00038	0.27047	64.8	4.7	65.2	2.4	110	140	65.2	2.4	0.617284
16TO-11_130.FIN2	357	1.145	0.0947	0.0046	0.0144	0.00043	0.26336	91.7	4.2	92.1	2.7	137	100	92.1	2.7	0.436205
16To_12_1.FIN2	425	1.275	0.0727	0.0035	0.01061	0.00035	0.21225	71.2	3.3	68	2.2	176	95	68	2.2	4.49438
16To_12_2.FIN2	58.6	1.05	0.074	0.019	0.0112	0.0014	0.57744	71	18	72	9.1	20	380	DISC	DISC	1.40845	Rim
16To_12_2.FIN2	144.2	0.419	0.231	0.013	0.03277	0.0012	0.37112	211	11	207.8	7.2	284	110	207.8	7.2	1.51659	Core
16To_12_3.FIN2	113.6	1.148	1.813	0.068	0.1775	0.0052	0.33389	1049	25	1053	29	1042	67	1042	67	1.05566
16To_12_4.FIN2	92.5	2.074	0.1055	0.0096	0.01374	0.00056	0.037865	101.4	8.7	88	3.6	380	180	88	3.6	13.215
16To_12_5.FIN2	245.6	0.939	0.1162	0.0055	0.01708	0.00059	0.22192	111.5	5	109.2	3.7	185	94	109.2	3.7	2.06278
16To_12_6.FIN2	442	1.511	0.0724	0.0033	0.01107	0.00034	0.34173	70.9	3.1	71	2.2	64	81	71	2.2	0.141044
16To_12_7.FIN2	99.2	1.394	4.492	0.17	0.3038	0.0092	0.52109	1729	31	1709	46	1744	62	1744	62	2.00688
16To_12_8.FIN2	186.8	1.131	0.0933	0.0051	0.01338	0.00045	0.20275	90.8	4.8	85.7	2.9	204	110	85.7	2.9	5.61674
16To_12_9.FIN2	381	0.778	0.1832	0.0075	0.02645	0.00076	0.25945	170.6	6.4	168.3	4.8	182	80	168.3	4.8	1.34818
16To_12_10.FIN2	97.6	0.6691	0.0729	0.0056	0.0105	0.00036	0.073843	71	5.3	67.4	2.3	200	140	67.4	2.3	5.07042
16To_12_11.FIN2	153	1.581	0.082	0.0056	0.01231	0.00042	0.15942	79.7	5.2	78.8	2.7	140	120	78.8	2.7	1.12923
16To_12_12.FIN2	307.9	1.513	2.799	0.12	0.2273	0.0086	0.74731	1352	33	1318	45	1385	71	1385	71	4.83755
16To_12_13.FIN2	449	2.96	0.222	0.012	0.0324	0.0014	0.56428	202.6	9.6	205.8	9	199	92	205.8	9	1.57947
16To_12_14.FIN2	197.1	1.868	0.0867	0.0048	0.01363	0.0005	0.28747	84.5	4.5	87.3	3.2	16	98	87.3	3.2	3.31361
16To_12_15.FIN2	276.2	4.13	0.0887	0.0051	0.01422	0.00053	0.42933	87.1	4.8	91.2	3.3	-16	94	91.2	3.3	4.70723
16To_12_16.FIN2	67.6	1.857	0.0894	0.0079	0.01457	0.00068	0.2249	86.8	7.3	93.2	4.3	-20	150	93.2	4.3	7.37327
16To_12_17.FIN2	277.7	1.269	0.0967	0.0048	0.0143	0.00045	0.12294	93.6	4.5	91.6	2.9	167	100	91.6	2.9	2.13675
16To_12_18.FIN2	93.2	1.317	4.674	0.17	0.3143	0.0094	0.68053	1764	30	1761	46	1755	62	1755	62	0.34188
16To_12_19.FIN2	316.3	1.708	0.1594	0.0069	0.02278	0.00069	0.2204	150.4	6	145.2	4.3	238	86	145.2	4.3	3.45745
16To_12_20.FIN2	1370	1.773	0.0948	0.0044	0.01355	0.00052	0.48012	91.8	4.1	86.8	3.3	230	93	86.8	3.3	5.44662
16To_12_21.FIN2	311	23	0.612	0.035	0.0783	0.0052	0.66125	484	22	486	31	561	100	486	31	0.413223	Rim
16To_12_21.FIN2	139.4	1.775	1.612	0.06	0.1605	0.0047	0.33559	976	23	959	26	994	68	994	68	3.52113	Core
16To_12_22.FIN2	322	2.2	0.1119	0.0053	0.01542	0.00048	0.16058	107.5	4.8	98.6	3	296	97	98.6	3	8.27907
16To_12_23.FIN2	646	31.2	0.1978	0.011	0.02783	0.0011	0.6523	182.8	9.3	177	6.8	228	96	177	6.8	3.17287
16To_12_24.FIN2	168.2	2.74	0.089	0.0049	0.01331	0.00045	0.060104	87.1	4.5	85.2	2.9	116	100	85.2	2.9	2.1814
16To_12_25.FIN2	447	1.832	0.0746	0.0036	0.01119	0.00036	0.22504	73	3.4	71.7	2.3	123	91	71.7	2.3	1.78082
16To_12_26.FIN2	409	1.061	0.0865	0.004	0.01324	0.0004	0.37419	84.1	3.7	84.8	2.6	57	82	84.8	2.6	0.832342
16To_12_27.FIN2	403	1.081	0.4604	0.017	0.05998	0.0017	0.3672	384.1	12	375.4	10	409	75	375.4	10	2.26504
16To_12_28.FIN2	202	1.431	1.881	0.071	0.1735	0.0052	0.6334	1076	24	1034	28	1129	65	1129	65	8.41453
16To_12_29.FIN2	528	0.636	0.0942	0.0042	0.0133	0.00043	0.35155	91.3	3.9	85.2	2.7	256	89	85.2	2.7	6.68127
16To_12_30.FIN2	282	1.209	0.1608	0.0069	0.02295	0.00068	0.17803	151.1	6	146.2	4.3	213	85	146.2	4.3	3.24289
16To_12_31.FIN2	632	1.612	0.093	0.0044	0.0139	0.00041	0.021815	90.5	4	89	2.6	105	83	89	2.6	1.65746
16To_12_32.FIN2	375.3	1.345	0.0709	0.0034	0.01088	0.00033	0.25124	69.5	3.2	69.8	2.1	47	90	69.8	2.1	0.431655
16To_12_33.FIN2	129.1	1.537	4.26	0.15	0.2975	0.009	0.57316	1687	30	1680	44	1686	59	1686	59	0.355872
16To_12_34.FIN2	364.2	1.347	0.0942	0.0046	0.01425	0.00043	0.060962	91.8	4.2	91.2	2.8	118	92	91.2	2.8	0.653595
16To_12_35.FIN2	561	1.586	0.3077	0.012	0.04377	0.0013	0.43144	272.5	8.9	276.1	8	230	76	276.1	8	1.3211
16To_12_36.FIN2	338.5	1.23	0.1632	0.0069	0.02359	0.00072	0.24162	153.6	5.9	150.3	4.5	188	82	150.3	4.5	2.14844
16To_12_37.FIN2	259.5	1.151	0.1874	0.0095	0.0264	0.0011	0.50791	174.4	8	167.9	6.8	241	92	167.9	6.8	3.72706
16To_12_38.FIN2	3790	9.31	0.2917	0.013	0.0409	0.0017	0.73865	259.6	10	258.6	11	271	86	258.6	11	0.385208
16To_12_39.FIN2	109.5	1.267	1.653	0.064	0.1626	0.0046	0.36198	989	25	971.1	26	1028	71	1028	71	5.53502
16To_12_40.FIN2	253.7	1.848	0.0972	0.0058	0.01465	0.00057	0.36071	94.3	5.4	93.7	3.6	96	100	93.7	3.6	0.636267
16To_12_42.FIN2	744	1.201	0.0973	0.0041	0.01461	0.00045	0.34152	94.4	3.8	93.5	2.9	115	82	93.5	2.9	0.95339
16To_12_43.FIN2	537	1.774	0.1152	0.0052	0.0169	0.00059	0.44293	110.5	4.7	108	3.7	163	85	108	3.7	2.26244
16To_12_44.FIN2	251.2	1.021	0.86	0.039	0.1039	0.0036	0.65491	629	21	637	21	569	87	637	21	1.27186
16To_12_45.FIN2	424	1.228	0.541	0.023	0.0729	0.0025	0.61367	438.7	15	453.6	15	352	81	453.6	15	3.3964
16To_12_46.FIN2	1263	1.92	0.0994	0.004	0.01505	0.00047	0.42828	96.1	3.7	96.3	3	89	74	96.3	3	0.208117
16To_12_47.FIN2	870	1.262	0.0929	0.0077	0.0112	0.00048	0.3901	90.1	7.2	71.8	3.1	560	170	DISC	DISC	20.3108
16To_12_48.FIN2	179.9	0.978	0.0995	0.0069	0.01351	0.00046	0.00037069	95.9	6.3	86.5	2.9	310	130	86.5	2.9	9.80188
16To_12_49.FIN2	94.3	1.334	0.082	0.006	0.0128	0.00047	0.082336	79.6	5.6	82	3	40	130	82	3	3.01508
16To_12_50.FIN2	135.8	1.177	2.932	0.11	0.2404	0.0075	0.67624	1390	29	1390	38	1394	63	1394	63	0.286944
16To_12_51.FIN2	134.2	2.79	0.0673	0.0061	0.0113	0.00054	0.23295	65.7	5.8	72.4	3.5	-30	150	72.4	3.5	10.1979
16To_12_52.FIN2	151.3	0.74	0.1486	0.0082	0.02272	0.00086	0.37559	140.1	7.2	144.8	5.4	46	97	144.8	5.4	3.35475
16To_12_53.FIN2	496	1.303	0.0881	0.0042	0.0126	0.0004	0.19253	85.6	3.9	80.7	2.6	230	98	80.7	2.6	5.7243
16To_12_54.FIN2	70.8	0.985	0.1116	0.01	0.01322	0.00053	0.3317	106.5	9.2	84.6	3.3	570	170	DISC	DISC	20.5634
16To_12_55.FIN2	212.8	0.647	0.1689	0.0075	0.02611	0.00082	0.32529	158.1	6.5	166.1	5.2	56	84	166.1	5.2	5.06009
16To_12_56.FIN2	257	1.534	0.0953	0.0058	0.01428	0.00063	0.42712	92.1	5.3	91.4	4	92	100	91.4	4	0.760043
16To_12_57.FIN2	975	0.997	0.1539	0.0057	0.02256	0.00064	0.26357	145.2	5	143.8	4	152	73	143.8	4	0.964187
16To_12_58.FIN2	131.2	1.048	3.004	0.11	0.2435	0.0075	0.58396	1407	28	1406	38	1408	65	1408	65	0.142045
16To_12_59.FIN2	86.4	1.145	0.819	0.034	0.0974	0.003	0.28539	612	20	599.8	18	622	88	599.8	18	1.99346
16To_12_60.FIN2	136.4	2.282	0.1005	0.0067	0.01394	0.00051	0.20741	96.8	6.2	89.3	3.3	240	120	89.3	3.3	7.74793
16To_12_61.FIN2	218.5	0.916	0.2914	0.012	0.04054	0.0012	0.31871	259.7	9.7	256.1	7.7	260	87	256.1	7.7	1.38621
16To_12_62.FIN2	31.4	0.2179	6.82	0.27	0.2559	0.0083	0.48711	2086	35	1467	42	2772	55	DISC	DISC	47.0779
16To_12_63.FIN2	408.7	0.77	0.0776	0.0037	0.01178	0.00037	0.1934	75.8	3.5	75.5	2.3	146	92	75.5	2.3	0.395778
16To_12_64.FIN2	146.4	1.389	0.0813	0.0049	0.01205	0.00039	0.061179	79.1	4.6	77.2	2.5	164	110	77.2	2.5	2.40202
16To_12_65.FIN2	97.8	0.9	0.0728	0.0054	0.01227	0.00047	0.034229	71.4	5	78.6	3	-70	130	78.6	3	10.084
16To_12_66.FIN2	333	1.34	0.1109	0.005	0.01631	0.00049	0.066761	106.6	4.6	104.3	3.1	187	88	104.3	3.1	2.1576
16To_12_67.FIN2	154.2	1.41	4.222	0.17	0.2967	0.01	0.72329	1675	33	1673	51	1672	66	1672	66	0.0598086
16To_12_68.FIN2	571	1.395	0.1659	0.0074	0.02413	0.00078	0.33393	155.7	6.4	153.7	4.9	208	90	153.7	4.9	1.28452
16To_12_69.FIN2	300	2.21	0.086	0.0046	0.01258	0.00039	0.14375	84	4.4	80.7	2.5	198	110	80.7	2.5	3.92857
16To_12_72.FIN2	91.4	0.796	2.187	0.086	0.1998	0.0066	0.61387	1173	27	1173	35	1186	72	1186	72	1.09612
16To_12_74.FIN2	332	2.218	0.0765	0.004	0.01192	0.00041	0.22717	74.7	3.8	76.4	2.6	47	93	76.4	2.6	2.27577
16To_12_75.FIN2	132.7	2.182	1.994	0.075	0.1898	0.0058	0.31964	1113	26	1122	32	1123	71	1123	71	0.0890472
16To_12_76.FIN2	434	1.06	0.0748	0.0034	0.0112	0.00034	0.26684	73.4	3.2	71.8	2.2	130	85	71.8	2.2	2.17984
16To_12_77.FIN2	354	1.593	0.081	0.0045	0.0129	0.00053	0.51919	78.9	4.2	82.6	3.4	37	94	82.6	3.4	4.68948
16To_12_78.FIN2	905	1.98	0.2642	0.011	0.03749	0.0013	0.60345	237.5	9.1	237.2	8.3	262	82	237.2	8.3	0.126316
16To_12_79.FIN2	392	0.935	0.1802	0.0073	0.02611	0.00078	0.25522	168	6.3	166.1	4.9	206	83	166.1	4.9	1.13095
16To_12_80.FIN2	345	1.043	0.0738	0.0037	0.01104	0.00036	0.15379	72.2	3.5	70.8	2.3	125	96	70.8	2.3	1.93906
16To_12_81.FIN2	1150	2.3	0.268	0.014	0.0364	0.0017	0.70468	241.9	11	230.2	11	356	95	230.2	11	4.83671
16To_12_82.FIN2	379	2.1	0.292	0.012	0.04245	0.0013	0.4468	260.1	9.3	267.9	7.9	224	79	267.9	7.9	2.99885
16To_12_83.FIN2	325	1.083	0.0816	0.0043	0.01231	0.00039	0.12505	79.4	4	78.9	2.5	112	98	78.9	2.5	0.629723
16To_12_84.FIN2	304	3.96	0.102	0.0055	0.01488	0.00052	0.14183	98.9	5.2	95.2	3.3	223	110	95.2	3.3	3.74115
16To_12_85.FIN2	220.2	1.419	0.408	0.019	0.0532	0.0021	0.63684	346.4	13	334.8	13	445	88	334.8	13	3.34873
16To_12_86.FIN2	483.3	1.519	0.0728	0.0033	0.01148	0.00035	0.29336	71.5	3.1	73.6	2.3	16	80	73.6	2.3	2.93706
16To_12_87.FIN2	54.8	1.233	1.766	0.075	0.1748	0.0056	0.43027	1033	27	1038	31	1048	76	1048	76	0.954198
16To_12_88.FIN2	454	1.613	0.2737	0.011	0.03954	0.0012	0.29527	245.3	8.5	250	7.2	226	78	250	7.2	1.91602
16To_12_89.FIN2	636	1.353	0.0778	0.0035	0.01136	0.00034	0.12999	75.9	3.3	72.8	2.2	202	89	72.8	2.2	4.08432
16To_12_90.FIN2	218	3.95	2.256	0.11	0.2025	0.0074	0.88592	1198	34	1192	39	1220	66	1220	66	2.29508
16To_12_91.FIN2	263.1	1.504	0.0864	0.0046	0.01152	0.00039	0.2011	84.3	4.2	73.8	2.5	365	100	73.8	2.5	12.4555
16To_12_92.FIN2	368	1.428	0.0798	0.0039	0.01205	0.00036	0.14935	77.9	3.7	77.2	2.3	90	90	77.2	2.3	0.898588
16To_12_93.FIN2	282	1.033	0.0918	0.0048	0.01396	0.00049	0.296	89.2	4.4	89.4	3.1	115	98	89.4	3.1	0.224215
16To_12_94.FIN2	368	1.34	4.16	0.16	0.2935	0.0095	0.75057	1666	32	1662	47	1679	60	1679	60	1.01251
16To_12_95.FIN2	55.28	1.642	0.102	0.0089	0.01539	0.00057	0.13409	99.7	7.9	98.7	3.7	160	150	98.7	3.7	1.00301
16To_12_96.FIN2	492	3.01	4.551	0.18	0.308	0.011	0.71029	1738	33	1737	53	1744	61	1744	61	0.401376
16To_12_97.FIN2	168.8	1.401	0.528	0.022	0.0695	0.0021	0.32525	429	15	432.9	13	397	84	432.9	13	0.909091
16To_12_98.FIN2	585	0.726	0.173	0.0068	0.02485	0.00075	0.3919	161.8	5.9	158.2	4.7	221	79	158.2	4.7	2.22497
16To_12_99.FIN2	220.3	2.065	0.1832	0.0082	0.02748	0.00085	0.21867	170.8	6.9	174.7	5.3	135	85	174.7	5.3	2.28337
16To_12_100.FIN2	537	0.953	3.034	0.14	0.1833	0.0076	0.83327	1409	35	1086	42	1947	63	DISC	DISC	44.2219
16To_12_102.FIN2	702	52.4	0.585	0.023	0.0732	0.0025	0.55813	467.6	15	455.5	15	540	81	455.5	15	2.58768
16To_12_103.FIN2	810	0.47	0.0714	0.0031	0.01088	0.00033	0.21999	70	2.9	69.76	2.1	45	79	69.76	2.1	0.342857
16To_12_104.FIN2	401	2.981	0.0796	0.0042	0.01219	0.00048	0.38335	77.9	4	78.1	3	101	97	78.1	3	0.256739
16To_12_105.FIN2	632	3.12	0.0801	0.005	0.01245	0.00067	0.54491	78.1	4.7	79.8	4.3	62	110	79.8	4.3	2.1767	Rim
16To_12_105.FIN2	693	3.39	1.01	0.059	0.0769	0.0043	0.94524	708	29	480	25	1480	65	DISC	DISC	32.2034	Core
16To_12_106.FIN2	470	1.206	0.0684	0.0033	0.01068	0.00037	0.25662	67.1	3.1	68.5	2.4	54	86	68.5	2.4	2.08644
16To_12_107.FIN2	273.8	1.393	0.0947	0.0061	0.01314	0.00048	0.39392	91.7	5.6	84.2	3.1	320	120	84.2	3.1	8.17884
16To_12_108.FIN2	473	1.063	0.2687	0.01	0.03839	0.0011	0.31247	241.4	8.3	242.8	7	230	78	242.8	7	0.57995
16To_12_109.FIN2	155.5	0.425	0.197	0.014	0.02479	0.00092	0.3325	181	12	157.9	5.8	460	130	157.9	5.8	12.7624
16To_12_110.FIN2	354	0.863	0.0782	0.0042	0.01155	0.0004	0.2988	76.2	3.9	74	2.5	178	100	74	2.5	2.88714
16To_12_111.FIN2	173.4	2.034	0.1252	0.0066	0.01852	0.00059	0.080628	119.5	5.9	118.3	3.7	176	100	118.3	3.7	1.00418
16To_12_112.FIN2	356	1.294	0.1193	0.006	0.01743	0.00056	0.15922	114.2	5.4	111.4	3.5	158	97	111.4	3.5	2.45184
16To_12_113.FIN2	164.7	1.028	0.0608	0.0044	0.00944	0.00037	0.3151	60	4.2	60.6	2.4	70	120	60.6	2.4	1
16To_12_114.FIN2	62.6	1.764	0.0623	0.0054	0.00941	0.00039	0.026343	61.9	5.1	60.4	2.5	150	160	60.4	2.5	2.42326
16To_12_115.FIN2	687	1.233	0.085	0.0041	0.01176	0.0004	0.49429	82.7	3.9	75.3	2.6	258	91	75.3	2.6	8.948
16To_12_116.FIN2	239	1.381	0.1596	0.0071	0.02433	0.00075	0.25137	150.4	6.1	155	4.7	92	83	155	4.7	3.05851
16To_12_117.FIN2	379	1.184	0.0908	0.0061	0.01139	0.00051	0.36626	88.2	5.7	73	3.2	500	140	DISC	DISC	17.2336
16To_12_118.FIN2	565	4.41	0.2873	0.012	0.04087	0.0013	0.34186	256	9.2	258.2	8	228	81	258.2	8	0.859375
16To_12_119.FIN2	368	0.877	0.0905	0.0043	0.01436	0.00044	0.10662	87.8	4	91.9	2.8	32	89	91.9	2.8	4.6697
16To_12_120.FIN2	493	1.296	0.4547	0.017	0.06128	0.0018	0.52116	381.1	12	383.3	11	375	76	383.3	11	0.577276
16To_12_122.FIN2	204	2.359	0.0951	0.0055	0.01499	0.00054	0.42404	92	5.1	95.9	3.4	28	95	95.9	3.4	4.23913
16To_12_123.FIN2	153	0.582	3.419	0.13	0.2357	0.0073	0.5966	1511	29	1363	38	1726	62	1726	62	21.0313
16To_12_124.FIN2	115.6	1.316	0.1253	0.01	0.01829	0.00077	0.34315	120.4	9.3	116.8	4.9	170	150	116.8	4.9	2.99003
16To_12_125.FIN2	125.4	1.455	1.682	0.065	0.1686	0.005	0.62169	1002	24	1005	28	971	70	971	70	3.50154
16To_12_126.FIN2	223.3	0.483	0.1665	0.0076	0.02435	0.00072	0.16359	156.5	6.7	155.1	4.5	166	89	155.1	4.5	0.894569
16To_12_128.FIN2	438	1.622	0.3063	0.012	0.04113	0.0012	0.35144	271.3	9.3	260.1	7.6	324	80	260.1	7.6	4.12827
16To_12_131.FIN2	277	1.084	0.0662	0.0035	0.01024	0.00032	0.088079	65	3.3	65.7	2.1	85	100	65.7	2.1	1.07692
16To_12_132.FIN2	376	0.971	0.178	0.0079	0.0256	0.00086	0.36513	166.5	6.7	162.9	5.4	210	86	162.9	5.4	2.16216
16To_13_1.FIN2	572	1.994	0.0804	0.0032	0.01237	0.00036	0.39173	78.5	3	79.33	2.3	65	61	79.33	2.3	1.05732
16To_13_2.FIN2	99.1	1.439	4.302	0.16	0.3025	0.0087	0.37923	1692.9	30	1703	43	1677	47	1677	47	1.55039
16To_13_3.FIN2	143.5	1.982	0.1112	0.005	0.01638	0.00049	0.31345	106.9	4.6	104.7	3.1	138	72	104.7	3.1	2.058
16To_13_4.FIN2	292	0.912	4.985	0.18	0.3306	0.0093	0.49466	1816.2	30	1841	45	1794	44	1794	44	2.61984
16To_13_5.FIN2	83.7	1.037	0.1141	0.0063	0.01598	0.00052	0.077075	109.5	5.7	102.2	3.3	295	110	102.2	3.3	6.66667
16To_13_6.FIN2	211	3.818	2.427	0.094	0.2161	0.0069	0.67744	1249	27	1260	37	1229	53	1229	53	2.52238
16To_13_7.FIN2	310.7	1.33	0.1859	0.0073	0.02706	0.00078	0.32505	173.2	6.3	172.3	4.8	233	64	172.3	4.8	0.51963
16To_13_8.FIN2	95.7	1.87	0.1633	0.0089	0.02357	0.00074	0.10868	156.7	7.9	150.2	4.7	270	100	150.2	4.7	4.14805
16To_13_9.FIN2	450	2.414	0.1666	0.0064	0.02405	0.0007	0.23978	156.4	5.6	153.2	4.4	209	62	153.2	4.4	2.04604
16To_13_10.FIN2	310.3	1.305	0.0831	0.0034	0.01294	0.00038	0.062103	81.2	3.3	82.98	2.5	66	67	82.98	2.5	2.19212
16To_13_11.FIN2	779	3.96	0.083	0.0034	0.01269	0.00043	0.61645	80.9	3.2	81.3	2.7	83	63	81.3	2.7	0.494438
16To_13_12.FIN2	320.6	2.111	0.1028	0.0043	0.01624	0.00049	0.19556	99.3	4	103.8	3.1	48	66	103.8	3.1	4.53172
16To_13_13.FIN2	266.4	1.308	0.0952	0.0042	0.01437	0.00043	0.23085	92.2	3.9	91.9	2.7	115	70	91.9	2.7	0.32538
16To_13_14.FIN2	455	1.87	0.0934	0.004	0.01444	0.00045	0.29872	90.5	3.7	92.4	2.9	105	69	92.4	2.9	2.09945
16To_13_15.FIN2	111.8	1.51	0.0993	0.0056	0.01488	0.0005	0.0038315	96	5.2	95.2	3.2	149	110	95.2	3.2	0.833333
16To_13_16.FIN2	397	8.66	0.706	0.028	0.08243	0.0025	0.37067	542.1	17	510.6	15	707	64	510.6	15	5.81074
16To_13_17.FIN2	266	1.569	0.179	0.0075	0.02645	0.00077	0.41064	167	6.4	168.3	4.8	171	65	168.3	4.8	0.778443
16To_13_18.FIN2	200.5	1.276	0.1033	0.0049	0.01494	0.00045	0.17138	99.7	4.5	95.6	2.9	219	84	95.6	2.9	4.11234
16To_13_19.FIN2	110.9	1.383	0.0731	0.0044	0.01108	0.00039	0.1716	71.4	4.1	71	2.5	160	110	71	2.5	0.560224
16To_13_20.FIN2	253	2.744	0.5571	0.021	0.07371	0.0021	0.3653	450.1	13	458.4	13	410	59	458.4	13	1.84403
16To_13_21.FIN2	850	1.399	0.0807	0.0032	0.01262	0.00037	0.27529	78.8	3.1	80.84	2.3	76	63	80.84	2.3	2.58883
16To_13_23.FIN2	306	0.799	0.1823	0.0072	0.02702	0.00079	0.34301	170.2	6.1	171.9	5	159	63	171.9	5	0.998825
16To_13_24.FIN2	137.5	1.732	0.3186	0.014	0.04414	0.0013	0.25608	280.2	11	278.4	7.9	282	72	278.4	7.9	0.642398
16To_13_25.FIN2	268	2.783	0.4338	0.017	0.05602	0.0017	0.67856	367	12	351.3	11	458	61	351.3	11	4.27793
16To_13_26.FIN2	70	1.691	0.0825	0.005	0.01222	0.00042	0.055579	80.6	4.7	78.3	2.6	140	110	78.3	2.6	2.8536
16To_13_27.FIN2	286.2	2.036	0.0869	0.0044	0.01254	0.00039	0.059606	84.5	4.1	80.3	2.5	178	94	80.3	2.5	4.97041
16To_13_28.FIN2	233	1.22	0.2135	0.0084	0.03078	0.00091	0.28933	196.3	7	195.4	5.7	185	65	195.4	5.7	0.458482
16To_13_29.FIN2	108.2	1.604	0.0628	0.004	0.00964	0.00031	0.15717	61.7	3.8	61.8	2	24	100	61.8	2	0.162075
16To_13_30.FIN2	255	1.886	0.1085	0.0048	0.0156	0.00046	0.2193	104.4	4.4	99.8	2.9	177	74	99.8	2.9	4.40613
16To_13_31.FIN2	56.7	1.315	0.322	0.016	0.04159	0.0013	0.040794	285	12	262.6	8	437	90	262.6	8	7.85965
16To_13_32.FIN2	583	3.551	2.289	0.085	0.204	0.006	0.60239	1207.7	26	1197	32	1200	50	1200	50	0.25
16To_13_33.FIN2	406	1.255	0.0854	0.0034	0.01294	0.00038	0.14088	83.1	3.2	82.91	2.4	53	61	82.91	2.4	0.22864
16To_13_34.FIN2	252.1	2.731	0.0836	0.0038	0.01237	0.00036	0.22489	81.4	3.5	79.26	2.3	152	75	79.26	2.3	2.62899
16To_13_35.FIN2	760	1.225	0.104	0.0041	0.01546	0.00046	0.3784	100.4	3.8	98.9	2.9	121	60	98.9	2.9	1.49402
16To_13_36.FIN2	334	1.62	0.0774	0.0036	0.0116	0.00034	0.16015	75.6	3.4	74.35	2.2	93	74	74.35	2.2	1.65344
16To_13_37.FIN2	180	2.71	0.562	0.022	0.07197	0.0021	0.2342	452.7	14	448	12	459	63	448	12	1.03822
16To_13_38.FIN2	113.1	0.963	0.2916	0.012	0.04057	0.0012	0.16255	259.8	9.8	256.3	7.7	239	73	256.3	7.7	1.34719
16To_13_39.FIN2	108.3	1.696	0.1139	0.0078	0.01543	0.00051	0.01052	109.3	7.1	98.7	3.3	340	140	98.7	3.3	9.69808
16To_13_40.FIN2	571	1.596	0.0759	0.0034	0.01186	0.00036	0.18569	74.3	3.2	76	2.3	56	73	76	2.3	2.28802
16To_13_41.FIN2	345	1.026	0.1791	0.0072	0.02614	0.00076	0.35095	167.7	6.3	166.3	4.8	186	64	166.3	4.8	0.834824
16To_13_42.FIN2	149.2	1.214	0.0941	0.0056	0.01493	0.00049	0.099735	91.6	5.1	95.5	3.1	57	110	95.5	3.1	4.25764	Rim
16To_13_42.FIN2	319	1.108	0.1911	0.01	0.02787	0.00092	0.44474	177.4	8.8	177.2	5.8	143	91	177.2	5.8	0.11274	Core
16To_13_43.FIN2	475	1.385	0.2451	0.0092	0.0355	0.001	0.3135	222.4	7.5	224.9	6.3	171	60	224.9	6.3	1.1241
16To_13_44.FIN2	416	1.573	0.2939	0.011	0.04201	0.0012	0.33249	261.4	8.8	265.2	7.5	247	60	265.2	7.5	1.45371
16To_13_45.FIN2	86.3	2.035	0.0902	0.0058	0.01375	0.00046	0.072788	87.5	5.4	88.1	2.9	90	110	88.1	2.9	0.685714
16To_13_46.FIN2	251.5	1.694	0.1052	0.0045	0.01576	0.00046	0.11251	101.5	4.2	100.83	2.9	128	70	100.83	2.9	0.660099
16To_13_47.FIN2	1076	3.32	0.3431	0.012	0.04707	0.0014	0.38247	299.5	9.4	296.5	8.6	339	60	296.5	8.6	1.00167
16To_13_48.FIN2	147.6	1.791	0.2915	0.012	0.04156	0.0012	0.12747	259.8	9.8	262.5	7.5	241	72	262.5	7.5	1.03926
16To_13_49.FIN2	84	0.977	0.2493	0.011	0.03612	0.0011	0.11031	226.1	9.3	228.7	6.7	201	76	228.7	6.7	1.14993
16To_13_50.FIN2	27.93	1.859	0.0548	0.0066	0.00923	0.00039	0.051655	53.5	6.3	59.2	2.5	-20	190	59.2	2.5	10.6542
16To_13_51.FIN2	202	1.324	0.1913	0.0078	0.02751	0.00081	0.19343	177.5	6.7	175.1	5.1	202	68	175.1	5.1	1.35211
16To_13_52.FIN2	134.7	1.38	0.0866	0.0046	0.01312	0.0004	0.20331	84.2	4.3	84	2.5	117	91	84	2.5	0.23753
16To_13_53.FIN2	156.1	1.226	0.3326	0.014	0.04358	0.0013	0.51431	292.7	10	275	7.9	438	68	275	7.9	6.04715
16To_13_54.FIN2	400	1.283	0.3226	0.012	0.04486	0.0013	0.19966	284	9	282.9	7.8	295	60	282.9	7.8	0.387324
16To_13_55.FIN2	191.9	1.591	0.1045	0.0047	0.01539	0.00046	0.1608	101	4.3	98.4	2.9	151	74	98.4	2.9	2.57426
16To_13_56.FIN2	249	2.01	0.0933	0.0045	0.01365	0.00043	0.29072	90.5	4.1	87.4	2.7	174	82	87.4	2.7	3.42541
16To_13_57.FIN2	243.5	1.79	0.0824	0.0038	0.01245	0.00039	0.29856	80.3	3.6	79.7	2.5	109	75	79.7	2.5	0.747198
16To_13_58.FIN2	241	1.279	0.0792	0.0037	0.01244	0.00039	0.25386	77.4	3.5	79.7	2.5	37	75	79.7	2.5	2.97158
16To_13_59.FIN2	226.1	2.1	0.0745	0.0035	0.01164	0.00034	0.11915	72.9	3.3	74.61	2.2	19	77	74.61	2.2	2.34568
16To_13_60.FIN2	141.1	2.08	0.0843	0.0045	0.01315	0.00041	0.092747	82	4.2	84.2	2.6	16	88	84.2	2.6	2.68293
16To_13_61.FIN2	290	1.569	0.0991	0.0046	0.0144	0.00043	0.28226	96.1	4.2	92.2	2.7	187	78	92.2	2.7	4.05827
16To_13_62.FIN2	129	0.712	3.158	0.12	0.251	0.0075	0.40065	1447.5	29	1443	39	1446	52	1446	52	0.207469
16To_13_63.FIN2	340.1	4.04	0.0906	0.004	0.01369	0.00043	0.3805	87.9	3.7	87.6	2.7	91	70	87.6	2.7	0.341297
16To_13_64.FIN2	12.59	1.126	1.848	0.086	0.1784	0.0059	0.38659	1060	31	1057	32	1067	77	1067	77	0.937207
16To_13_65.FIN2	344.7	2.286	0.1069	0.0048	0.01614	0.00051	0.27664	103.6	4.3	103.2	3.2	117	73	103.2	3.2	0.3861
16To_13_66.FIN2	559	1.269	0.0783	0.0032	0.01195	0.00035	0.26131	76.5	3	76.57	2.2	84	62	76.57	2.2	0.0915033
16To_13_67.FIN2	72	2.32	0.1036	0.0063	0.01601	0.00054	0.14585	99.8	5.8	102.4	3.4	62	100	102.4	3.4	2.60521
16To_13_68.FIN2	243	1.574	0.5658	0.022	0.07319	0.0022	0.48851	454.6	14	455.3	13	446	62	455.3	13	0.153982
16To_13_69.FIN2	226	2.097	0.1013	0.0046	0.01494	0.00045	0.037487	98.1	4.2	95.6	2.9	151	77	95.6	2.9	2.54842
16To_13_70.FIN2	133.9	2.186	1.907	0.087	0.1842	0.0073	0.56753	1085	30	1091	41	1021	69	1021	69	6.85602
16To_13_71.FIN2	36.6	0.749	1.797	0.071	0.1749	0.0056	0.29658	1045	26	1040	30	1078	63	1078	63	3.52505
16To_13_72.FIN2	526	1.702	0.1945	0.0077	0.02752	0.00086	0.16844	180.3	6.5	175	5.4	235	70	175	5.4	2.93955
16To_13_73.FIN2	185.1	1.985	0.0843	0.0043	0.01322	0.00041	0.22906	82	4	84.7	2.6	13	79	84.7	2.6	3.29268
16To_13_74.FIN2	132.8	2.93	2.57	0.11	0.2229	0.0073	0.87862	1290	31	1296	39	1276	49	1276	49	1.5674
16To_13_75.FIN2	87.3	2.216	0.569	0.024	0.07434	0.0022	0.091484	456.1	15	462.2	13	412	71	462.2	13	1.33743
16To_13_76.FIN2	67.3	1.41	0.1127	0.0065	0.01553	0.0005	0.027332	108	5.9	99.3	3.2	320	110	99.3	3.2	8.05556
16To_13_77.FIN2	251.8	1.634	0.1702	0.0073	0.02518	0.00076	0.18782	159.4	6.3	160.3	4.8	156	72	160.3	4.8	0.564617
16To_13_78.FIN2	36.1	2.986	0.1171	0.0092	0.01549	0.0006	0.029971	111.5	8.3	99.1	3.8	330	140	99.1	3.8	11.1211
16To_13_79.FIN2	102.7	2.214	0.1068	0.0055	0.01522	0.00048	0.13661	102.8	5.1	97.4	3	223	91	97.4	3	5.25292
16To_13_80.FIN2	423	3.17	0.086	0.004	0.01254	0.00043	0.46446	83.7	3.7	80.4	2.7	176	78	80.4	2.7	3.94265
16To_13_81.FIN2	252.9	1.498	0.1027	0.0044	0.01531	0.00045	0.12085	99.2	4	98	2.8	118	71	98	2.8	1.20968
16To_13_82.FIN2	233.6	2.412	0.0878	0.0041	0.01341	0.00041	0.19989	85.3	3.9	85.9	2.6	100	79	85.9	2.6	0.7034
16To_13_83.FIN2	364	2.88	0.0716	0.0034	0.0113	0.00035	0.26197	70.2	3.2	72.5	2.2	34	75	72.5	2.2	3.27635
16To_13_84.FIN2	55.4	2.144	0.0699	0.0089	0.01137	0.00052	0.042245	68.1	8.4	72.9	3.3	-60	210	72.9	3.3	7.04846	Rim
16To_13_84.FIN2	306	6.19	0.1828	0.0095	0.02655	0.001	0.66019	172.1	8.7	168.9	6.4	218	77	168.9	6.4	1.85938	Core
16To_13_85.FIN2	101	1.016	2.002	0.075	0.1949	0.0056	0.46164	1114.8	26	1147	30	1067	52	1067	52	7.49766
16To_13_86.FIN2	199	1.377	0.0849	0.0042	0.01241	0.00039	0.1068	82.6	3.9	79.5	2.5	201	89	79.5	2.5	3.75303
16To_13_87.FIN2	220	1.813	0.0878	0.0041	0.01386	0.00042	0.060875	85.6	3.8	88.7	2.7	57	78	88.7	2.7	3.6215
16To_13_88.FIN2	246	1.408	0.5626	0.021	0.0738	0.0021	0.40165	453.7	14	459	13	438	60	459	13	1.16817
16To_13_89.FIN2	175.8	2.348	0.2971	0.012	0.04233	0.0012	0.13335	263.8	9.2	267.3	7.5	241	66	267.3	7.5	1.32676
16To_13_90.FIN2	114.8	1.804	0.0932	0.005	0.01437	0.00044	0.16124	90.2	4.7	91.9	2.8	100	91	91.9	2.8	1.8847
16To_13_91.FIN2	156	1.429	0.1106	0.0051	0.01628	0.00049	0.067003	106.4	4.7	104.1	3.1	176	80	104.1	3.1	2.16165
16To_13_92.FIN2	364	3.996	0.0865	0.0035	0.01331	0.00039	0.1982	84.2	3.3	85.2	2.5	75	63	85.2	2.5	1.18765
16To_13_93.FIN2	214.2	1.478	0.569	0.021	0.07523	0.0022	0.33647	457.5	14	468	13	409	59	468	13	2.29508
16To_13_94.FIN2	162	1.337	0.101	0.005	0.01437	0.00045	0.053139	97.5	4.6	92	2.8	283	96	92	2.8	5.64103
16To_13_95.FIN2	354	1.927	0.3204	0.013	0.04484	0.0013	0.33186	282.9	9.6	282.7	8.1	271	66	282.7	8.1	0.0706964
16To_13_96.FIN2	525	1.822	0.0785	0.0034	0.01232	0.00037	0.29301	76.7	3.2	78.9	2.4	16	66	78.9	2.4	2.86832
16To_13_97.FIN2	152.5	2.071	0.309	0.013	0.04152	0.0013	0.33744	273.6	10	262.2	7.9	382	72	262.2	7.9	4.16667
16To_13_98.FIN2	213.2	1.492	0.0724	0.0037	0.0114	0.00037	0.24101	70.9	3.5	73.1	2.3	20	81	73.1	2.3	3.10296
16To_13_99.FIN2	200	2.56	3.463	0.14	0.2615	0.0082	0.76519	1518	31	1496	42	1553	48	1553	48	3.67032
16To_13_100.FIN2	686	1.85	0.0565	0.0025	0.00853	0.00029	0.56141	55.8	2.4	54.8	1.9	119	68	54.8	1.9	1.79211
16To_13_101.FIN2	118.5	1.908	0.0949	0.0042	0.0142	0.00033	0.31787	91.9	3.9	90.9	2.1	139	83	90.9	2.1	1.08814
16To_13_102.FIN2	81.7	2.472	0.0887	0.0048	0.01259	0.0003	0.012867	86.4	4.4	80.7	1.9	230	110	80.7	1.9	6.59722
16To_13_103.FIN2	553	3.055	0.2895	0.0078	0.04064	0.00071	0.38388	258.2	6.2	256.8	4.4	250	51	256.8	4.4	0.542215
16To_13_104.FIN2	119.4	1.8	0.0896	0.0041	0.01319	0.00028	0.15565	87.3	3.8	84.5	1.8	131	84	84.5	1.8	3.20733
16To_13_105.FIN2	263	1.001	0.0685	0.0029	0.01015	0.00021	0.20647	67.2	2.7	65.1	1.3	145	79	65.1	1.3	3.125
16To_13_106.FIN2	121.8	1.679	0.3359	0.011	0.04665	0.00094	0.34728	294	8.2	293.9	5.8	299	61	293.9	5.8	0.0340136
16To_13_107.FIN2	127	1.312	0.0972	0.0044	0.01486	0.00033	0.011023	94	4.1	95.1	2.1	64	88	95.1	2.1	1.17021
16To_13_108.FIN2	107.2	2.708	0.0774	0.0038	0.01173	0.00027	0.11588	75.5	3.6	75.2	1.7	98	94	75.2	1.7	0.397351
16To_13_109.FIN2	107.5	3.132	0.0887	0.0043	0.01367	0.00032	0.2296	86.1	4	87.5	2	80	87	87.5	2	1.62602
16To_13_110.FIN2	272	2.044	0.0797	0.0035	0.01234	0.00033	0.26176	77.7	3.2	79	2.1	62	81	79	2.1	1.6731
16To_13_111.FIN2	266	2.504	0.079	0.0035	0.01242	0.00027	0.099765	77.7	3.3	79.6	1.7	61	83	79.6	1.7	2.4453
16To_13_112.FIN2	990	1.397	0.1	0.0029	0.01503	0.00027	0.3406	96.9	2.7	96.2	1.7	127	53	96.2	1.7	0.722394
16To_13_113.FIN2	412	4.36	0.0977	0.0032	0.01457	0.00029	0.18961	94.6	2.9	93.2	1.8	156	66	93.2	1.8	1.47992
16To_13_114.FIN2	334.4	1.835	0.0907	0.0031	0.01333	0.00025	0.33503	88.5	2.9	85.3	1.6	188	64	85.3	1.6	3.61582
16To_13_115.FIN2	29.66	4.052	0.127	0.011	0.01555	0.0005	0.22468	120.1	10	99.4	3.2	520	170	DISC	DISC	17.2356
16To_13_116.FIN2	261	1.405	1.583	0.062	0.1533	0.0055	0.68116	970	25	919	31	1136	62	1136	62	19.1021	Rim
16To_13_116.FIN2	27.31	1.809	4.096	0.13	0.308	0.0084	0.60208	1652	27	1729	42	1605	49	1605	49	7.72586	Core
16To_13_118.FIN2	32.5	0.74	2.973	0.089	0.2408	0.0049	0.43539	1399	23	1390	25	1449	50	1449	50	4.07177
16To_13_120.FIN2	563	70.6	0.606	0.02	0.0792	0.002	0.64884	480.5	13	491.2	12	484	57	491.2	12	2.22685	Rim
16To_13_120.FIN2	160.4	1.703	2.013	0.068	0.1943	0.005	0.82896	1119	23	1144	27	1088	51	1088	51	5.14706	Core
16To_13_121.FIN2	318	3.2	0.0955	0.0036	0.01461	0.00038	0.28395	92.8	3.3	93.5	2.4	109	72	93.5	2.4	0.75431
16To_13_122.FIN2	87.8	2.045	0.0968	0.0051	0.0146	0.00035	0.25881	93.5	4.7	93.4	2.2	137	96	93.4	2.2	0.106952
16To_13_123.FIN2	288	1.357	3.65	0.14	0.2556	0.0075	0.82063	1556	30	1464	38	1706	44	1706	44	14.1852
16To_13_124.FIN2	427	1.429	0.1811	0.0051	0.02654	0.00046	0.21901	169	4.4	168.9	2.9	207	53	168.9	2.9	0.0591716
16To_13_125.FIN2	361	2.966	0.0803	0.0028	0.01231	0.00024	0.25294	78.3	2.6	78.8	1.5	104	65	78.8	1.5	0.63857
16To_13_126.FIN2	163.2	1.507	0.1046	0.0046	0.01553	0.0004	0.32093	101.9	4.4	99.3	2.5	210	82	99.3	2.5	2.55152
16To_13_127.FIN2	148.1	1.135	0.543	0.017	0.07248	0.0014	0.40998	440.9	11	451	8.5	416	58	451	8.5	2.29077
16To_13_128.FIN2	1013	1.243	0.0786	0.0026	0.01182	0.00022	0.31011	76.8	2.5	75.72	1.4	150	65	75.72	1.4	1.40625
16To_13_129.FIN2	182	1.19	0.0763	0.0036	0.01159	0.00025	0.032105	74.5	3.4	74.3	1.6	119	91	74.3	1.6	0.268456
16To_13_130.FIN2	226	1.372	0.2909	0.0083	0.04157	0.00071	0.38941	259.4	6.4	262.6	4.4	233	54	262.6	4.4	1.23362
16TO14_1.FIN2	96.4	1.363	0.446	0.019	0.06001	0.00095	0.032078	371	13	375.6	5.8	327	89	375.6	5.8	1.23989
16TO14_2.FIN2	440	2.091	0.0747	0.0029	0.01181	0.00019	0.10358	73	2.8	75.71	1.2	25	75	75.71	1.2	3.71233
16TO14_3.FIN2	116.8	1.314	1.423	0.032	0.1485	0.0022	0.20886	897.1	13	893.3	12	906	49	906	49	1.40177
16TO14_4.FIN2	136.9	2.075	0.0837	0.0057	0.01222	0.00031	0.054175	81.2	5.3	78.3	2	170	130	78.3	2	3.57143
16TO14_5.FIN2	560	2.653	3.52	0.17	0.236	0.011	0.97568	1499	46	1357	60	1767	34	1767	34	23.2032
16TO14_6.FIN2	191.2	2.193	0.0839	0.0047	0.01222	0.00026	0.098397	81.5	4.3	78.3	1.6	180	110	78.3	1.6	3.92638
16TO14_7.FIN2	729	2.98	0.283	0.011	0.0364	0.0007	0.093145	252.9	8.8	230.5	4.3	459	91	230.5	4.3	8.85726
16TO14_8.FIN2	153.2	2.022	1.799	0.038	0.1723	0.0025	0.2939	1045.9	14	1024.6	14	1096	43	1096	43	6.5146
16TO14_9.FIN2	198	1.987	0.1019	0.0057	0.01574	0.00033	0.010374	98	5.2	100.7	2.1	70	110	100.7	2.1	2.7551
16TO14_10.FIN2	247	2.068	0.1009	0.0046	0.01469	0.00028	0.02393	97.3	4.3	94	1.8	215	100	94	1.8	3.39157
16TO14_11.FIN2	666	23.8	0.4783	0.01	0.06347	0.00097	0.28071	396.5	7.2	396.6	5.9	403	47	396.6	5.9	0.0252207
16TO14_12.FIN2	266	1.086	3.08	0.058	0.2489	0.0035	0.52325	1426.6	15	1432	18	1419	37	1419	37	0.916138
16TO14_14.FIN2	641	7.69	0.822	0.025	0.0909	0.0016	0.52431	608	14	560.7	9.5	808	59	560.7	9.5	7.77961
16TO14_15.FIN2	436	1.873	0.157	0.0054	0.02266	0.00039	0.10756	147.8	4.7	144.4	2.4	199	72	144.4	2.4	2.30041
16TO14_16.FIN2	104.7	1.1	0.101	0.011	0.01475	0.00056	0.010932	97.3	9.7	94.4	3.6	170	200	94.4	3.6	2.98047
16TO14_17.FIN2	307	1.154	0.0951	0.0042	0.01415	0.00033	0.21289	92	3.9	90.6	2.1	134	88	90.6	2.1	1.52174
16TO14_18.FIN2	247.4	1.95	0.1621	0.0068	0.02327	0.00044	0.09819	152.1	5.9	148.3	2.7	214	87	148.3	2.7	2.49836
16TO14_19.FIN2	541	1.927	1.675	0.033	0.1645	0.0022	0.5076	998.3	13	981.9	12	1039	39	1039	39	5.49567
16TO14_20.FIN2	440	1.019	0.1769	0.0054	0.02561	0.0004	0.17526	165.6	4.7	163	2.5	197	65	163	2.5	1.57005
16TO14_21.FIN2	294.3	1.738	0.4239	0.01	0.05617	0.00082	0.18966	358.3	7.3	352.2	5	384	57	352.2	5	1.70248
16TO14_22.FIN2	309	1.817	0.1051	0.0045	0.01524	0.00028	0.15684	101.2	4.2	97.5	1.8	201	88	97.5	1.8	3.65613
16TO14_23.FIN2	414	6.31	0.441	0.025	0.0562	0.0018	0.041169	371	18	353	11	470	150	353	11	4.85175	Rim
16TO14_23.FIN2	978	52.6	1.714	0.048	0.1586	0.0037	0.93349	1011	19	948	21	1170	38	1170	38	18.9744	Core
16TO14_24.FIN2	164.2	0.912	0.528	0.016	0.0681	0.0013	0.15265	428.9	10	424.4	7.7	424	67	424.4	7.7	1.0492
16TO14_25.FIN2	234	3.14	0.0884	0.0045	0.01279	0.00027	0.0045673	85.7	4.2	81.9	1.7	189	100	81.9	1.7	4.43407
16TO14_26.FIN2	693	1.307	0.0952	0.0041	0.01351	0.00024	0.25752	92.2	3.7	86.5	1.5	224	85	86.5	1.5	6.18221
16TO14_27.FIN2	204.5	1.091	0.541	0.016	0.0693	0.0013	0.24716	437.8	11	431.9	7.8	453	62	431.9	7.8	1.34765
16TO14_28.FIN2	299	1.15	0.2969	0.0089	0.04174	0.00062	0.21046	264.1	7.1	263.6	3.8	250	65	263.6	3.8	0.189322
16TO14_29.FIN2	558	0.822	0.1773	0.0053	0.02626	0.0004	0.28041	165.9	4.5	167.1	2.5	140	61	167.1	2.5	0.723327
16TO14_30.FIN2	355	3.07	2.938	0.058	0.236	0.0038	0.58165	1390.3	15	1365	20	1423	39	1423	39	4.0759
16TO14_31.FIN2	195.4	2.352	4.944	0.1	0.3198	0.0049	0.49149	1812	17	1788	24	1831	38	1831	38	2.34844
16TO14_32.FIN2	105.1	1.884	0.0834	0.0082	0.01169	0.0005	0.0074502	80.9	7.6	74.9	3.2	240	190	74.9	3.2	7.41656
16TO14_33.FIN2	484	1.661	0.3085	0.0077	0.04239	0.00071	0.42792	272.6	5.9	267.6	4.4	304	54	267.6	4.4	1.83419
16TO14_34.FIN2	313	2.46	1.519	0.066	0.1429	0.0054	0.90949	925	29	859	31	1097	48	1097	48	21.6955
16TO14_35.FIN2	276.4	1.224	0.559	0.013	0.07242	0.0011	0.22905	450	8.8	450.7	6.4	437	55	450.7	6.4	0.155556
16TO14_36.FIN2	105.9	0.881	0.0758	0.0059	0.01222	0.00034	0.028094	74.5	5.7	78.3	2.2	0	140	78.3	2.2	5.10067
16TO14_37.FIN2	110.5	1.39	0.0834	0.0092	0.01201	0.00039	0.22443	80.6	8.6	77	2.5	130	190	77	2.5	4.4665
16TO14_38.FIN2	174.2	1.702	0.0923	0.0054	0.01259	0.00029	0.097904	89.3	5	80.6	1.9	290	120	80.6	1.9	9.74244
16TO14_39.FIN2	370	2.594	0.1072	0.0049	0.01501	0.00038	0.26848	103.1	4.5	96	2.4	255	93	96	2.4	6.88652
16TO14_40.FIN2	118.5	1.991	0.1473	0.0075	0.02178	0.00042	0.061077	138.8	6.6	138.9	2.7	147	100	138.9	2.7	0.0720461
16TO14_41.FIN2	459	1.202	0.1871	0.0055	0.02665	0.00044	0.32327	173.9	4.7	169.6	2.7	226	61	169.6	2.7	2.47269
16TO14_42.FIN2	201.3	1.212	0.185	0.012	0.0271	0.00083	0.18231	172	10	172.4	5.2	180	150	172.4	5.2	0.232558
16TO14_43.FIN2	289	1.662	0.0899	0.0044	0.01408	0.00028	0.063949	87.2	4.1	90.2	1.8	41	92	90.2	1.8	3.44037
16TO14_44.FIN2	630	1.04	4.461	0.091	0.3034	0.0049	0.88114	1723	17	1709	24	1733	33	1733	33	1.38488
16TO14_45.FIN2	237.2	3.7	0.0942	0.0043	0.01433	0.00026	0.0064203	91.1	4	91.7	1.7	91	91	91.7	1.7	0.658617
16TO14_46.FIN2	121.4	0.684	3.215	0.075	0.256	0.0041	0.59029	1458	18	1469	21	1441	40	1441	40	1.9431
16TO14_47.FIN2	285	0.806	0.197	0.015	0.0247	0.0012	0.068247	182	12	157.4	7.6	590	240	157.4	7.6	13.5165
16TO14_48.FIN2	211.5	2.664	1.574	0.04	0.153	0.0024	0.28002	959	16	917.5	13	1052	52	1052	52	12.7852
16TO14_49.FIN2	1940	5.9	0.3068	0.0072	0.04276	0.00078	0.58452	271.4	5.6	269.9	4.8	288	48	269.9	4.8	0.55269
16TO14_50.FIN2	364.3	1.738	0.312	0.02	0.0431	0.0013	0.21538	275	15	271.8	8.2	290	140	271.8	8.2	1.16364
16TO14_51.FIN2	108.3	0.6744	12.59	0.24	0.4974	0.0067	0.5292	2648.8	18	2602	29	2685	32	2685	32	3.09125
16TO14_52.FIN2	105.2	3.09	3.975	0.093	0.2792	0.0048	0.62908	1627	20	1587	24	1677	40	1677	40	5.36673
16TO14_53.FIN2	132.4	0.978	0.1046	0.0073	0.01524	0.00036	0.16114	100.3	6.6	97.5	2.3	160	120	97.5	2.3	2.79163
16TO14_54.FIN2	244	1.414	0.1033	0.0048	0.0159	0.00037	0.36079	99.5	4.4	101.7	2.4	75	86	101.7	2.4	2.21106
16TO14_55.FIN2	995	4.05	0.599	0.031	0.0743	0.0046	0.45378	476	20	462	28	550	140	462	28	2.94118	Rim
16TO14_55.FIN2	471	1.682	1.464	0.043	0.142	0.003	0.86825	912	18	856	17	1048	42	1048	42	18.3206	Core
16TO14_56.FIN2	832	5.035	0.0934	0.0029	0.01426	0.00024	0.21455	90.9	2.8	91.3	1.5	103	66	91.3	1.5	0.440044
16TO14_57.FIN2	390.7	3.067	0.057	0.0028	0.00885	0.0002	0.1303	56.5	2.7	56.8	1.3	69	94	56.8	1.3	0.530973
16TO14_58.FIN2	257	2.58	0.3	0.012	0.04168	0.00087	0.042977	267.5	10	263.2	5.4	296	98	263.2	5.4	1.60748
16TO14_59.FIN2	203	1.677	0.1017	0.008	0.01525	0.00048	0.026613	97.9	7.4	97.5	3	130	160	97.5	3	0.40858
16TO14_60.FIN2	303.4	0.961	0.2081	0.01	0.02953	0.0008	0.28011	191.5	8.5	187.6	5	221	100	187.6	5	2.03655
16TO14_61.FIN2	373	1.387	3.217	0.059	0.2555	0.0035	0.13079	1460.4	14	1466	18	1448	36	1448	36	1.24309
16TO14_62.FIN2	410	0.931	0.529	0.015	0.06231	0.001	0.2107	430.4	9.9	389.6	6.3	641	64	389.6	6.3	9.47955
16TO14_63.FIN2	358.9	1.306	0.1317	0.0072	0.01657	0.00042	0.0029999	126.9	7.1	106	2.7	500	140	DISC	DISC	16.4697
16TO14_64.FIN2	471	1.883	0.1486	0.0058	0.02102	0.00038	0.15828	140.4	5.1	134.1	2.4	230	81	134.1	2.4	4.48718
16TO14_65.FIN2	412	2.935	2.734	0.064	0.2184	0.0042	0.7034	1335	17	1273	22	1432	40	1432	40	11.1034
16TO14_66.FIN2	290	2.816	0.0799	0.004	0.01276	0.00027	0.1019	77.8	3.8	81.7	1.7	30	96	81.7	1.7	5.01285
16TO14_67.FIN2	171	1.056	0.561	0.018	0.07359	0.0012	0.14999	450	12	457.6	7.5	410	75	457.6	7.5	1.68889
16TO14_68.FIN2	940	1.367	0.455	0.02	0.05893	0.0011	0.25093	380	14	369.1	6.4	440	100	369.1	6.4	2.86842
16TO14_69.FIN2	264	1.688	0.1612	0.0063	0.0238	0.00045	0.19388	151.2	5.5	151.6	2.8	159	79	151.6	2.8	0.26455
16TO14_70.FIN2	413	1.638	0.0935	0.0038	0.014	0.00026	0.019065	90.5	3.5	89.6	1.6	135	85	89.6	1.6	0.994475
16TO14_71.FIN2	556	2.69	3.59	0.18	0.25	0.012	0.98128	1519	44	1430	62	1687	35	1687	35	15.2341
16TO14_72.FIN2	132.6	0.86	5.681	0.12	0.3487	0.0052	0.37331	1927	18	1928	25	1927	37	1927	37	0.0518941
16TO14_73.FIN2	284	2.06	3.922	0.089	0.2871	0.0049	0.68692	1617	18	1626	25	1601	39	1601	39	1.56152
16TO14_74.FIN2	390	3.31	3.16	0.06	0.2473	0.0035	0.61854	1446.4	15	1424	18	1486	34	1486	34	4.17227
16TO14_75.FIN2	197.9	1.414	0.1048	0.0066	0.01538	0.00036	0.316	100.8	6.1	98.4	2.3	150	120	98.4	2.3	2.38095
16TO14_76.FIN2	236	0.743	0.2637	0.0087	0.03862	0.00062	0.01729	236.9	7	244.2	3.8	190	74	244.2	3.8	3.08147
16TO14_77.FIN2	865	1.75	0.1795	0.007	0.02616	0.00056	0.19653	167.4	6	166.4	3.5	186	84	166.4	3.5	0.597372
16TO14_78.FIN2	101.8	0.7115	1.756	0.042	0.1713	0.0028	0.30205	1027	15	1019	15	1033	50	1033	50	1.35528
16TO14_79.FIN2	207.7	1.485	0.537	0.016	0.07017	0.0012	0.31582	434.9	10	437.1	7.4	412	63	437.1	7.4	0.505863
16TO14_80.FIN2	557	1.78	0.0916	0.0032	0.01387	0.00022	0.052149	88.9	3	88.8	1.4	106	71	88.8	1.4	0.112486
16TO14_81.FIN2	234	2.035	0.4042	0.012	0.05477	0.0009	0.23319	343.8	8.4	343.7	5.5	331	64	343.7	5.5	0.0290867
16TO14_82.FIN2	234	2.762	0.0846	0.0049	0.0132	0.0003	0.11472	82.7	4.6	84.5	1.9	37	100	84.5	1.9	2.17654
16TO14_83.FIN2	215	2.496	0.0584	0.0043	0.00843	0.00023	0.15863	57.4	4	54.1	1.4	180	130	54.1	1.4	5.74913
16TO14_84.FIN2	276	0.793	0.1153	0.0053	0.01709	0.00036	0.093384	110.4	4.8	109.2	2.3	145	90	109.2	2.3	1.08696
16TO14_85.FIN2	196.9	1.956	0.1023	0.0057	0.01347	0.00033	0.16219	98.6	5.3	86.3	2.1	380	120	86.3	2.1	12.4746
16TO14_86.FIN2	220	1.39	3.084	0.062	0.2462	0.0036	0.41984	1428.4	15	1419	19	1441	39	1441	39	1.52672
16TO14_87.FIN2	458	1.283	0.1177	0.0052	0.01572	0.00029	0.3037	111.6	4.2	100.6	1.8	340	85	100.6	1.8	9.85663
16TO14_88.FIN2	80.9	1.325	0.0985	0.0089	0.01375	0.00044	0.16919	94.3	8.2	88	2.8	200	160	88	2.8	6.68081
16TO14_89.FIN2	116.5	2.289	2.089	0.053	0.1925	0.0035	0.52734	1142	17	1134	19	1157	48	1157	48	1.9879
16TO14_90.FIN2	234.6	1.925	0.388	0.011	0.05319	0.00084	0.31758	332.1	7.9	334.1	5.1	308	60	334.1	5.1	0.602228
16TO14_91.FIN2	377.4	1.677	0.0787	0.0036	0.01205	0.0002	0.0040871	76.7	3.4	77.2	1.3	87	90	77.2	1.3	0.65189
16TO14_92.FIN2	27.22	1.285	1.601	0.07	0.1574	0.0033	0.22396	960	27	946	19	962	91	962	91	1.6632
16TO14_93.FIN2	280.1	0.98	0.0803	0.0054	0.01202	0.00034	0.12125	78.2	5	77	2.2	140	130	77	2.2	1.53453
16TO14_94.FIN2	600	1.74	0.3035	0.0074	0.04326	0.00068	0.27743	268.8	5.8	273	4.2	225	53	273	4.2	1.5625
16TO14_95.FIN2	133.6	1.274	0.292	0.012	0.04188	0.00077	0.11957	258.5	9.1	264.5	4.8	206	82	264.5	4.8	2.32108
16TO14_96.FIN2	235.5	2.436	0.0979	0.0055	0.01477	0.00031	0.01697	94.5	5	94.5	2	110	110	94.5	2	0
16TO14_97.FIN2	350.7	1.77	0.0837	0.0041	0.01158	0.00025	0.16343	81.4	3.8	74.2	1.6	276	95	74.2	1.6	8.84521
16TO14_98.FIN2	179.6	1.577	0.313	0.014	0.04035	0.00081	0.26176	275.3	10	254.9	5	423	88	254.9	5	7.4101
16TO14_99.FIN2	339	1.502	0.5595	0.013	0.07244	0.0011	0.30426	450.6	8.2	450.8	6.7	448	52	450.8	6.7	0.0443853
16TO14_100.FIN2	94	0.635	2.451	0.092	0.2054	0.0057	0.83983	1253	28	1210	29	1345	47	1345	47	10.0372
16TO14_101.FIN2	220	1.303	0.1064	0.0067	0.01551	0.00035	0.13059	102.2	6.2	99.2	2.2	170	120	99.2	2.2	2.93542
16TO14_102.FIN2	510	0.574	0.0934	0.0039	0.01326	0.00027	0.22322	90.5	3.7	84.9	1.7	242	87	84.9	1.7	6.18785
16TO14_103.FIN2	309	1.543	0.0836	0.0047	0.01265	0.00036	0.038305	81.4	4.4	81	2.3	140	120	81	2.3	0.4914
16TO14_104.FIN2	715	1.955	0.0694	0.0028	0.01038	0.00018	0.18718	68	2.7	66.55	1.1	140	81	66.55	1.1	2.13235
16TO14_105.FIN2	941	1.95	0.1133	0.0031	0.01678	0.00026	0.16651	108.8	2.9	107.3	1.7	139	58	107.3	1.7	1.37868
16TO14_106.FIN2	113	1.046	3.12	0.11	0.2482	0.0069	0.58696	1431	29	1427	36	1427	62	1427	62	0
16TO14_107.FIN2	196.2	1.548	0.1004	0.0057	0.01504	0.00033	0.0541	96.8	5.2	96.2	2.1	110	110	96.2	2.1	0.619835
16TO14_108.FIN2	268	3.324	0.0897	0.0044	0.01326	0.00026	0.086598	86.9	4.1	84.9	1.6	133	94	84.9	1.6	2.3015
16TO14_109.FIN2	325	2.028	0.0951	0.0064	0.01257	0.00039	0.12739	92	6	80.5	2.5	350	140	80.5	2.5	12.5
16TO14_110.FIN2	255.9	1.016	0.0731	0.0039	0.01101	0.00024	0.029534	71.4	3.7	70.6	1.5	91	100	70.6	1.5	1.12045
16TO14_111.FIN2	473	1.78	4.347	0.095	0.3047	0.0056	0.78359	1699	18	1713	28	1671	36	1671	36	2.51346
16TO14_112.FIN2	347	1.58	3.466	0.1	0.2469	0.0056	0.93692	1515	23	1421	29	1633	36	1633	36	12.9822
16TO14_113.FIN2	346	5.26	3.234	0.066	0.2565	0.0039	0.52249	1464.9	16	1471	20	1435	39	1435	39	2.50871
16TO14_114.FIN2	421	1.121	0.3076	0.0078	0.04263	0.00065	0.1283	271.9	6.1	269.1	4	277	58	269.1	4	1.02979
16TO14_115.FIN2	364	1.528	0.07	0.0038	0.00992	0.0002	0.075535	68.5	3.6	63.6	1.3	200	110	63.6	1.3	7.15328
16TO14_116.FIN2	287.9	2.249	0.0845	0.004	0.01254	0.00026	0.036068	82.1	3.8	80.3	1.6	127	97	80.3	1.6	2.19245
16TO14_117.FIN2	206	0.98	3.126	0.068	0.2483	0.004	0.49604	1437	17	1429	20	1425	42	1425	42	0.280702
16TO14_118.FIN2	373	1.871	0.0856	0.004	0.01211	0.00028	0.14104	83.1	3.7	77.6	1.8	212	93	77.6	1.8	6.61853
16TO14_119.FIN2	380	2.002	0.0821	0.0042	0.01226	0.00023	0.058126	79.9	3.9	78.5	1.5	108	96	78.5	1.5	1.75219
16TO14_120.FIN2	2992	0.9653	0.1807	0.0039	0.02379	0.00033	0.25386	168.6	3.4	151.5	2.1	384	47	151.5	2.1	10.1423
16TO14_121.FIN2	92.4	1.63	0.1059	0.0074	0.01612	0.00038	0.088308	101.4	6.8	103.1	2.4	50	120	103.1	2.4	1.67653
16TO14_122.FIN2	930	3.389	0.0835	0.0027	0.01284	0.00024	0.18885	81.6	2.6	82.2	1.5	67	66	82.2	1.5	0.735294
16TO14_123.FIN2	445	1.772	4.282	0.079	0.2983	0.0041	0.55123	1689	15	1682	21	1675	35	1675	35	0.41791
16TO14_124.FIN2	201.9	1.493	0.0923	0.0049	0.01206	0.00027	0.25984	89.9	4.6	77.3	1.7	370	110	77.3	1.7	14.0156
16TO14_125.FIN2	291.3	0.875	0.0739	0.0036	0.01133	0.00022	0.022647	72.2	3.4	72.6	1.4	62	94	72.6	1.4	0.554017
16TO14_126.FIN2	530	1.14	0.5726	0.013	0.07167	0.001	0.36958	459.2	8.1	446.2	6.2	493	50	446.2	6.2	2.83101
16TO14_127.FIN2	56.4	1.599	5.085	0.12	0.3235	0.0049	0.30748	1830	19	1812	24	1835	42	1835	42	1.25341
16TO14_128.FIN2	200.2	2.511	0.0834	0.0054	0.01169	0.00026	0.17105	80.9	5	74.9	1.6	210	120	74.9	1.6	7.41656
16TO14_129.FIN2	411	4.89	0.0878	0.0034	0.0132	0.00028	0.25488	85.3	3.2	84.6	1.8	92	74	84.6	1.8	0.820633
16TO14_130.FIN2	213.6	2.287	0.0769	0.0046	0.01193	0.00028	0.094667	74.9	4.3	76.5	1.8	50	110	76.5	1.8	2.13618
16TO14_131.FIN2	699.9	1.943	0.0897	0.0029	0.01319	0.00021	0.04193	87.2	2.7	84.45	1.3	144	68	84.45	1.3	3.15367
16TO14_132.FIN2	751	0.793	0.1842	0.0049	0.02692	0.0004	0.17076	171.5	4.2	171.2	2.5	161	57	171.2	2.5	0.174927
16TO14_133.FIN2	412	2.112	0.3213	0.0091	0.04382	0.00069	0.17181	282.4	7	276.4	4.3	314	64	276.4	4.3	2.12465
16TO14_134.FIN2	97.7	7.45	1.484	0.041	0.1469	0.0025	0.22874	921	17	883	14	985	59	985	59	10.3553
16TO14_135.FIN2	73	0.72	6.471	0.13	0.364	0.0057	0.35547	2042	18	2000	27	2073	38	2073	38	3.52147
16TO14_136.FIN2	1161	32.8	1.715	0.046	0.165	0.0042	0.79251	1013	18	984	23	1067	44	1067	44	7.77882	Rim
16TO14_136.FIN2	613	3.11	3.99	0.13	0.2747	0.0074	0.92442	1627	26	1563	38	1705	37	1705	37	8.32845	Core
16TO14_137.FIN2	594	4.55	0.4294	0.0093	0.0576	0.00081	0.32874	362.4	6.6	361	4.9	351	50	361	4.9	0.386313
16TO14_138.FIN2	236	1.5	4.12	0.088	0.2912	0.0047	0.48428	1657	18	1647	23	1670	39	1670	39	1.37725
16TO14_139.FIN2	791	2.576	0.103	0.0034	0.01543	0.00027	0.11967	99.4	3.1	98.7	1.7	119	72	98.7	1.7	0.704225
16TO14_140.FIN2	461.1	0.767	0.5586	0.013	0.0716	0.0012	0.58465	449.9	8.7	445.7	7.2	449	50	445.7	7.2	0.933541
16TO15_1.FIN2	182	2.011	0.586	0.015	0.0749	0.001	0.34617	467	9.5	465.4	6.2	452	55	465.4	6.2	0.342612
16TO15_2.FIN2	95	1.133	0.078	0.0089	0.01127	0.00041	0.20393	75.5	8.4	72.2	2.6	150	210	72.2	2.6	4.37086
16TO15_3.FIN2	232	0.806	0.524	0.012	0.07	0.0011	0.36711	426.8	8	435.9	6.6	374	53	435.9	6.6	2.13215
16TO15_4.FIN2	237.1	1.779	0.3129	0.0085	0.04376	0.00066	0.30566	275.7	6.6	276	4.1	269	59	276	4.1	0.108814
16TO15_5.FIN2	483	2.02	3.954	0.065	0.2763	0.0039	0.72269	1622	13	1572	20	1681	27	1681	27	6.48424
16TO15_7.FIN2	192.2	1.63	0.1063	0.0047	0.01543	0.0003	0.15592	102.2	4.3	98.7	1.9	178	90	98.7	1.9	3.42466
16TO15_8.FIN2	230	1.129	0.1566	0.0053	0.02299	0.00038	0.1303	147.3	4.7	146.5	2.4	168	72	146.5	2.4	0.543109
16TO15_9.FIN2	361	2.056	0.29	0.0069	0.04076	0.00061	0.25838	258	5.4	257.5	3.8	261	54	257.5	3.8	0.193798
16TO15_10.FIN2	144.8	1.1	0.113	0.011	0.01633	0.00053	0.12571	109	10	104.4	3.4	180	190	104.4	3.4	4.22018
16TO15_11.FIN2	423	3.84	0.0911	0.0063	0.01376	0.00058	0.51184	88.3	5.9	88.1	3.7	130	140	88.1	3.7	0.226501
16TO15_12.FIN2	430	0.802	0.1822	0.0063	0.02645	0.00054	0.27076	169.7	5.4	168.3	3.4	190	75	168.3	3.4	0.824985
16TO15_13.FIN2	395.7	1.838	0.0878	0.003	0.01357	0.00021	0.0056942	85.3	2.8	86.9	1.3	74	72	86.9	1.3	1.87573
16TO15_14.FIN2	411.9	2.635	0.0794	0.0027	0.01224	0.00018	0.17269	77.5	2.6	78.4	1.2	71	68	78.4	1.2	1.16129
16TO15_15.FIN2	272	1.479	0.0975	0.004	0.0144	0.0003	0.075433	94.3	3.7	92.1	1.9	172	89	92.1	1.9	2.33298
16TO15_16.FIN2	560	2.039	0.0978	0.0066	0.01348	0.00058	0.14911	94.7	6.1	86.3	3.7	310	160	86.3	3.7	8.87012
16TO15_17.FIN2	463	1.666	0.1019	0.0033	0.0149	0.0002	0.19983	98.4	3	95.3	1.3	174	66	95.3	1.3	3.15041
16TO15_18.FIN2	140.4	3.7	0.0791	0.0051	0.0123	0.00028	0.13266	76.9	4.7	78.8	1.8	50	120	78.8	1.8	2.47074
16TO15_19.FIN2	355	1.204	0.882	0.015	0.1041	0.0013	0.42176	642.2	8.1	638.4	7.8	648	39	638.4	7.8	0.591716
16TO15_20.FIN2	136.2	1.285	0.503	0.013	0.06684	0.001	0.15204	413.5	8.9	417	6.2	385	61	417	6.2	0.846433
16TO15_21.FIN2	458	3.361	0.0736	0.0026	0.01107	0.00017	0.23336	72	2.4	71	1.1	126	69	71	1.1	1.38889
16TO15_22.FIN2	441	2.25	0.2892	0.0059	0.04059	0.00063	0.29361	257.5	4.6	256.4	3.9	267	48	256.4	3.9	0.427184
16TO15_23.FIN2	333	1.486	0.096	0.0039	0.0145	0.00032	0.23196	92.8	3.6	92.8	2.1	118	81	92.8	2.1	0
16TO15_24.FIN2	252.8	2.1	0.0677	0.0042	0.00991	0.00027	0.0019014	66.4	4	63.6	1.7	180	120	63.6	1.7	4.21687
16TO15_25.FIN2	738	1.206	0.0893	0.0031	0.01374	0.00023	0.11466	86.7	2.9	88	1.4	76	71	88	1.4	1.49942
16TO15_26.FIN2	169	2.22	0.58	0.018	0.0755	0.0015	0.39952	465	12	468.9	8.7	436	66	468.9	8.7	0.83871
16TO15_27.FIN2	535	1.33	0.0969	0.0031	0.01437	0.00026	0.32674	93.8	2.9	92	1.7	158	69	92	1.7	1.91898
16TO15_28.FIN2	445.9	1.463	0.2603	0.0055	0.03684	0.00051	0.34874	234.5	4.4	233.2	3.2	247	48	233.2	3.2	0.554371
16TO15_29.FIN2	337	2.33	0.286	0.014	0.03834	0.00098	0.24646	255	11	242.5	6.1	360	120	242.5	6.1	4.90196	Rim
16TO15_29.FIN2	191.9	3.34	2.1	0.11	0.1593	0.0077	0.90344	1140	38	951	43	1537	47	DISC	DISC	38.1262	Core
16TO15_30.FIN2	129.7	1.923	0.0886	0.0059	0.01409	0.00032	0.1353	86.3	5.6	90.2	2	20	120	90.2	2	4.51912
16TO15_31.FIN2	240.9	1.342	1.855	0.027	0.1783	0.0022	0.45451	1063.6	9.7	1057	12	1077	32	1077	32	1.85701
16TO15_32.FIN2	105.8	2.248	0.086	0.006	0.01298	0.00029	0.069795	83.2	5.6	83.1	1.8	110	130	83.1	1.8	0.120192
16TO15_33.FIN2	242	1.387	0.0835	0.0041	0.01221	0.00024	0.049705	81.2	3.9	78.2	1.5	172	97	78.2	1.5	3.69458
16TO15_34.FIN2	108.1	1.27	2.107	0.041	0.1965	0.0034	0.46189	1148	13	1155	18	1139	42	1139	42	1.40474
16TO15_35.FIN2	245	16	0.575	0.015	0.0722	0.0011	0.45261	459.5	9.8	449.6	6.7	489	53	449.6	6.7	2.15452
16TO15_36.FIN2	932	210	4.56	0.14	0.309	0.0082	0.74039	1740	25	1735	40	1750	40	1750	40	0.857143	Rim
16TO15_36.FIN2	214.7	2.35	11.73	0.22	0.493	0.0072	0.72499	2580	17	2582	31	2576	25	2576	25	0.232919	Core
16TO15_37.FIN2	268	2.375	0.0894	0.008	0.0142	0.00043	0.25525	86.7	7.4	90.9	2.7	0	160	90.9	2.7	4.84429	Rim
16TO15_37.FIN2	607	2.235	0.1625	0.0059	0.02397	0.00059	0.49462	152.6	5.1	152.7	3.7	142	74	152.7	3.7	0.0655308	Core
16TO15_38.FIN2	334	12.79	0.4977	0.0097	0.06522	0.00079	0.2539	409.4	6.6	407.3	4.8	407	46	407.3	4.8	0.512946
16TO15_40.FIN2	436	4.65	0.587	0.012	0.0761	0.001	0.41524	469.1	7.6	473	6.3	443	45	473	6.3	0.831379
16TO15_41.FIN2	502	1.054	0.0773	0.0026	0.01205	0.0002	0.14542	75.5	2.4	77.2	1.3	50	67	77.2	1.3	2.25166
16TO15_42.FIN2	56.4	1.6	4.889	0.082	0.3203	0.0043	0.52878	1797	14	1792	22	1809	31	1809	31	0.939746
16TO15_43.FIN2	210	2.043	0.1022	0.0052	0.0147	0.00028	0.15416	98.4	4.8	94	1.8	194	98	94	1.8	4.47154
16TO15_44.FIN2	333.7	1.479	0.2134	0.0065	0.02983	0.00049	0.15289	196.9	5.6	189.4	3.1	265	67	189.4	3.1	3.80904
16TO15_45.FIN2	214	1.377	0.126	0.0052	0.01912	0.00033	0.19242	120.7	4.6	122.1	2.1	103	80	122.1	2.1	1.1599
16TO15_46.FIN2	305	1.669	0.1106	0.0054	0.01538	0.0004	0.35793	106.3	4.9	98.4	2.5	277	97	98.4	2.5	7.4318
16TO15_47.FIN2	382	0.667	0.0595	0.0029	0.00889	0.00019	0.095894	58.5	2.8	57.1	1.2	127	98	57.1	1.2	2.39316
16TO15_48.FIN2	540	1.326	0.0898	0.0035	0.01346	0.00024	0.2017	87.1	3.3	86.2	1.5	119	77	86.2	1.5	1.0333
16TO15_49.FIN2	333	2.045	0.0946	0.0036	0.01281	0.00024	0.22713	91.6	3.3	82.1	1.5	328	79	82.1	1.5	10.3712
16TO15_50.FIN2	221	1.842	0.0989	0.0045	0.01476	0.00026	0.09224	95.4	4.2	94.5	1.6	139	95	94.5	1.6	0.943396
16TO15_51.FIN2	378	2.81	0.088	0.01	0.01365	0.00075	0.38172	85.1	9.7	87.4	4.8	20	210	87.4	4.8	2.7027	Rim
16TO15_51.FIN2	1260	19.2	3.32	0.11	0.2494	0.0068	0.9379	1478	26	1433	36	1547	28	1547	28	7.3691	Core
16TO15_52.FIN2	182	2.636	0.0846	0.0052	0.01282	0.00026	0.093391	82	4.8	82.1	1.7	80	110	82.1	1.7	0.121951
16TO15_53.FIN2	474	2.056	0.0818	0.0029	0.01242	0.0002	0.17596	79.7	2.7	79.5	1.3	109	73	79.5	1.3	0.250941
16TO15_54.FIN2	306	0.815	0.1602	0.0055	0.02393	0.00039	0.11236	150.5	4.8	152.4	2.4	125	70	152.4	2.4	1.26246
16TO15_55.FIN2	406	1.517	0.309	0.0073	0.0438	0.00057	0.39839	272.9	5.7	276.3	3.5	240	50	276.3	3.5	1.24588
16TO15_56.FIN2	264.1	2.053	0.0915	0.0043	0.01303	0.00024	0.15608	88.6	4	83.5	1.5	216	91	83.5	1.5	5.75621
16TO15_57.FIN2	116.1	2.272	0.0836	0.0056	0.01303	0.00028	0.068915	81.1	5.2	83.4	1.8	60	120	83.4	1.8	2.836
16TO15_58.FIN2	114	0.939	3.015	0.047	0.2413	0.003	0.52645	1410	12	1393	16	1439	30	1439	30	3.19666
16TO15_59.FIN2	316	2.091	0.0872	0.0039	0.01289	0.00024	0.097136	85.1	3.7	82.7	1.5	160	92	82.7	1.5	2.82021
16TO15_60.FIN2	280	2.692	1.658	0.028	0.1653	0.0021	0.61309	990	11	986	12	1002	33	1002	33	1.59681
16TO15_61.FIN2	368.4	1.448	0.084	0.0037	0.01199	0.00021	0.24591	81.7	3.5	76.8	1.4	219	88	76.8	1.4	5.99755
16TO15_62.FIN2	196	2.367	0.0588	0.004	0.00922	0.00019	0.11533	57.7	3.8	59.2	1.2	20	120	59.2	1.2	2.59965
16TO15_63.FIN2	224.4	2.197	0.1249	0.0089	0.01539	0.00042	0.032832	119.1	8	98.5	2.7	510	160	DISC	DISC	17.2964
16TO15_64.FIN2	387	0.999	0.0839	0.0059	0.01217	0.00026	0.10198	81.5	5.5	77.9	1.6	190	140	77.9	1.6	4.41718
16TO15_65.FIN2	229	0.958	0.1805	0.0058	0.02621	0.00039	0.20928	168	5	166.8	2.4	194	68	166.8	2.4	0.714286
16TO15_66.FIN2	145.2	1.908	0.2726	0.0092	0.03879	0.00079	0.30032	243.8	7.4	245.2	4.9	246	72	245.2	4.9	0.574241
16TO15_67.FIN2	614	1.2	0.1802	0.0046	0.02659	0.00035	0.19619	168	3.9	169.1	2.2	159	54	169.1	2.2	0.654762
16TO15_68.FIN2	288.3	2.66	0.0913	0.0036	0.01385	0.00024	0.19846	88.6	3.3	88.6	1.5	122	79	88.6	1.5	0
16TO15_69.FIN2	101.3	1.001	0.0784	0.0058	0.01174	0.00028	0.01868	76.1	5.4	75.2	1.8	120	130	75.2	1.8	1.18265
16TO15_70.FIN2	579	2.012	0.092	0.0026	0.01397	0.00019	0.16325	89.3	2.4	89.4	1.2	120	62	89.4	1.2	0.111982
16TO15_71.FIN2	98.7	0.921	0.579	0.019	0.0735	0.0013	0.37215	461	12	456.8	7.9	476	68	456.8	7.9	0.911063
16TO15_72.FIN2	300	1.718	0.569	0.012	0.0723	0.0013	0.3911	456	7.8	449.6	7.6	483	51	449.6	7.6	1.40351
16TO15_73.FIN2	283.3	2.37	0.552	0.01	0.07227	0.00095	0.30059	445.6	6.7	450.4	5.9	425	45	450.4	5.9	1.0772
16TO15_74.FIN2	498	4.11	0.0901	0.0026	0.0138	0.00024	0.2952	87.5	2.4	88.4	1.5	104	59	88.4	1.5	1.02857
16TO15_75.FIN2	406	1.889	0.0924	0.0031	0.01408	0.00024	0.33093	89.6	2.9	90.1	1.5	97	64	90.1	1.5	0.558036
16TO15_76.FIN2	201	2.063	0.0838	0.0048	0.01206	0.00033	0.11369	81.5	4.5	77.3	2.1	220	130	77.3	2.1	5.15337
16TO15_77.FIN2	489	7.6	0.559	0.033	0.0691	0.003	0.37539	450	22	431	18	560	130	431	18	4.22222	Rim
16TO15_77.FIN2	145	4.63	4.44	0.11	0.2953	0.0061	0.82873	1714	21	1666	30	1779	31	1779	31	6.35188	Core
16TO15_78.FIN2	351	3.32	0.0814	0.0032	0.01255	0.00024	0.14298	79.3	3	80.4	1.5	100	82	80.4	1.5	1.38714
16TO15_79.FIN2	328	3.774	0.0906	0.0035	0.01367	0.00021	0.17814	87.9	3.2	87.5	1.4	116	76	87.5	1.4	0.455063
16TO15_80.FIN2	248.7	1.353	0.0894	0.0056	0.01276	0.00033	0.10497	86.8	5.2	81.7	2.1	240	140	81.7	2.1	5.87558
16TO15_81.FIN2	356	1.723	0.0831	0.0034	0.01218	0.00024	0.15793	80.9	3.2	78	1.5	184	86	78	1.5	3.58467
16TO15_82.FIN2	145.8	1.239	0.082	0.0046	0.01196	0.00026	0.040954	79.7	4.3	76.7	1.7	170	110	76.7	1.7	3.76412
16TO15_83.FIN2	133.6	1.403	0.0706	0.0043	0.01019	0.00025	0.28334	68.9	4.1	65.3	1.6	230	120	65.3	1.6	5.22496
16TO15_84.FIN2	412	1.607	0.0782	0.003	0.01178	0.00021	0.2356	76.3	2.8	75.5	1.3	111	73	75.5	1.3	1.04849
16TO15_85.FIN2	1230	14.8	0.1884	0.0056	0.02684	0.00053	0.42884	175	4.7	170.7	3.3	251	60	170.7	3.3	2.45714	Rim
16TO15_85.FIN2	173	1.333	0.522	0.029	0.0676	0.0029	0.73573	425	19	421	18	442	86	421	18	0.941176	Core
16TO15_86.FIN2	353	3.007	11.41	0.15	0.488	0.0065	0.75958	2555	13	2560	28	2556	21	2556	21	0.156495
16TO15_87.FIN2	115.5	1.426	0.1044	0.0058	0.01594	0.00037	0.12677	100.3	5.3	101.9	2.3	100	100	101.9	2.3	1.59521
16TO15_88.FIN2	336.7	5.19	0.0845	0.003	0.01284	0.00024	0.14574	82.2	2.8	82.2	1.5	113	72	82.2	1.5	0
16TO15_89.FIN2	243	2.13	0.097	0.012	0.0132	0.00092	0.11175	93	11	84.5	5.9	320	260	84.5	5.9	9.13978	Rim
16TO15_89.FIN2	531	4.25	0.1548	0.005	0.02287	0.00043	0.5422	145.8	4.4	145.7	2.7	149	55	145.7	2.7	0.0685871	Core
16TO15_90.FIN2	193	2.146	0.099	0.0043	0.01485	0.00028	0.14125	95.6	3.9	95	1.8	134	85	95	1.8	0.627615
16TO15_91.FIN2	229	2.495	0.0644	0.0033	0.00948	0.00018	0.11361	63.6	3.2	60.8	1.2	180	100	60.8	1.2	4.40252
16TO15_92.FIN2	286.1	2.352	0.0896	0.0034	0.01396	0.00025	0.21154	86.9	3.2	89.4	1.6	58	75	89.4	1.6	2.87687
16TO15_93.FIN2	468	2.75	0.0884	0.003	0.01334	0.00019	0.044076	85.8	2.8	85.4	1.2	116	73	85.4	1.2	0.4662
16TO15_94.FIN2	320	2.023	0.0727	0.0041	0.01119	0.00021	0.28963	71	3.8	71.7	1.3	90	110	71.7	1.3	0.985915
16TO15_95.FIN2	265	1.707	4.262	0.053	0.2966	0.003	0.5325	1684.3	10	1674	15	1697	24	1697	24	1.35533
16TO15_96.FIN2	314	2.699	0.0816	0.0034	0.01235	0.0002	0.18521	79.9	3.3	79.1	1.3	113	83	79.1	1.3	1.00125
16TO15_97.FIN2	409	1.593	0.0965	0.0032	0.01453	0.00024	0.073159	93.4	2.9	93	1.5	129	71	93	1.5	0.428266
16TO15_98.FIN2	830	1.91	0.0951	0.004	0.01413	0.00026	0.05789	92	3.7	90.4	1.6	129	80	90.4	1.6	1.73913
16TO15_99.FIN2	238.5	1.311	0.512	0.014	0.06725	0.00097	0.35348	420.5	9.2	419.5	5.9	402	60	419.5	5.9	0.237812
16TO15_100.FIN2	196.7	2.294	0.0832	0.0034	0.01279	0.00025	0.068916	81	3.2	81.9	1.6	76	85	81.9	1.6	1.11111
16TO15_101.FIN2	240	1.276	0.0941	0.0041	0.01412	0.00023	0.18751	91.1	3.8	90.4	1.5	115	82	90.4	1.5	0.768386
16TO15_102.FIN2	286	1.51	0.299	0.011	0.04215	0.00077	0.13531	264.2	8.4	266.1	4.8	233	75	266.1	4.8	0.719152
16TO15_103.FIN2	498	0.851	0.0967	0.0029	0.01509	0.00023	0.27186	93.6	2.7	96.6	1.5	53	60	96.6	1.5	3.20513
16TO15_104.FIN2	238.1	2.794	0.316	0.01	0.04448	0.0007	0.22358	277.9	7.9	280.5	4.3	242	69	280.5	4.3	0.935588
16TO15_105.FIN2	353	2.48	0.0851	0.003	0.01299	0.00021	0.17013	82.8	2.8	83.2	1.3	97	71	83.2	1.3	0.483092
16TO15_106.FIN2	90.1	1.655	0.1056	0.0082	0.01515	0.00042	0.02824	101.2	7.5	96.9	2.7	210	160	96.9	2.7	4.24901
16TO15_107.FIN2	291.7	1.62	0.093	0.0073	0.01389	0.00038	0.39961	90.1	6.7	88.9	2.4	120	140	88.9	2.4	1.33185
16TO15_108.FIN2	205.3	2.332	0.1633	0.0059	0.02461	0.00039	0.11461	153.1	5.1	156.7	2.5	119	74	156.7	2.5	2.3514
16TO15_109.FIN2	92.9	1.708	0.281	0.011	0.04066	0.00075	0.19628	249.7	9	256.8	4.6	202	83	256.8	4.6	2.84341
16TO15_110.FIN2	104.5	0.999	0.18	0.022	0.02569	0.0008	0.23495	166	19	163.5	5	180	220	163.5	5	1.50602
16TO15_111.FIN2	554	1.675	0.088	0.0026	0.01286	0.00021	0.19635	85.5	2.4	82.4	1.3	175	65	82.4	1.3	3.62573
16TO15_112.FIN2	600	1.789	0.1076	0.0047	0.01624	0.0003	0.092122	103.5	4.3	103.8	1.9	128	90	103.8	1.9	0.289855
16TO15_113.FIN2	61.6	1.306	0.098	0.011	0.01386	0.00055	0.034275	94	10	88.7	3.5	210	220	88.7	3.5	5.6383
16TO15_114.FIN2	90.8	2.294	0.31	0.013	0.04199	0.00073	0.079346	272	9.9	265.1	4.5	315	87	265.1	4.5	2.53676
16TO15_115.FIN2	684	1.597	0.0968	0.0027	0.01455	0.0002	0.28551	93.7	2.5	93.1	1.3	113	57	93.1	1.3	0.640342
16TO15_116.FIN2	227	2.75	4.695	0.07	0.321	0.004	0.68862	1764	13	1796	19	1730	25	1730	25	3.81503
16TO15_117.FIN2	182.5	1.605	0.312	0.02	0.0402	0.0015	0.20175	274	15	254	9.5	440	140	254	9.5	7.29927
16TO15_118.FIN2	208	2.105	0.558	0.013	0.07222	0.001	0.37782	448.8	8.5	449.4	6	448	50	449.4	6	0.13369
16TO15_119.FIN2	183	1.89	0.0804	0.0095	0.01128	0.00064	0.24764	78.2	8.9	72.3	4	240	240	72.3	4	7.54476	Rim
16TO15_119.FIN2	137.1	1.366	0.857	0.029	0.1018	0.0021	0.40754	626	16	625	12	622	71	625	12	0.159744	Core
16TO15_120.FIN2	134.6	1.786	0.0712	0.0049	0.01013	0.00024	0.031214	69.4	4.6	64.9	1.5	190	130	64.9	1.5	6.48415
16TO15_121.FIN2	808	1.064	0.1218	0.0044	0.0159	0.00033	0.41556	116.5	4	101.7	2.1	437	77	101.7	2.1	12.7039
16TO15_122.FIN2	168.4	1.358	0.2884	0.0098	0.03935	0.00065	0.139	256.3	7.8	248.8	4	305	74	248.8	4	2.92626
16TO15_123.FIN2	245	2.564	0.577	0.012	0.07349	0.00093	0.37757	461.4	7.5	457.1	5.6	472	45	457.1	5.6	0.931946
16TO15_124.FIN2	230	3.75	0.0991	0.0043	0.01497	0.00026	0.10463	95.6	4	95.8	1.7	127	90	95.8	1.7	0.209205
16TO15_125.FIN2	601	1.943	0.0833	0.0027	0.0123	0.00016	0.24314	81.4	2.5	78.78	1	153	67	78.78	1	3.21867
16TO15_126.FIN2	534	2.05	0.622	0.012	0.07555	0.00087	0.47264	490.4	7.7	469.4	5.2	583	41	469.4	5.2	4.28222
16TO15_127.FIN2	405	1.642	0.5507	0.01	0.0723	0.00087	0.5705	444.6	6.7	450	5.2	405	39	450	5.2	1.21457
16TO15_128.FIN2	182	2.081	0.1007	0.0052	0.0152	0.0003	0.12553	97	4.8	97.2	1.9	96	98	97.2	1.9	0.206186
16TO15_129.FIN2	132	3.62	0.0955	0.0084	0.01389	0.00041	0.064059	91.9	7.7	88.9	2.6	160	160	88.9	2.6	3.26442	Rim
16TO15_129.FIN2	182.1	2.63	0.146	0.011	0.02105	0.00068	0.075712	138.1	9.5	134.3	4.3	200	150	134.3	4.3	2.75163	Core
16TO15_130.FIN2	309	4.61	0.0863	0.0049	0.01348	0.00033	0.22806	83.9	4.6	86.3	2.1	50	110	86.3	2.1	2.86055	Rim
16TO15_130.FIN2	140	1.67	0.145	0.014	0.0213	0.0012	0.17408	137	12	135.7	7.5	160	190	135.7	7.5	0.948905	Core
16TO15_132.FIN2	447	1.815	0.0956	0.0037	0.01231	0.00021	0.18845	92.5	3.4	78.9	1.3	420	82	78.9	1.3	14.7027
16TO15_133.FIN2	56.9	1.199	0.0955	0.0096	0.01365	0.0005	0.0067417	91.6	8.9	87.4	3.2	160	190	87.4	3.2	4.58515
16TO15_134.FIN2	382	1.219	0.2974	0.0069	0.04193	0.00067	0.41355	263.9	5.4	264.7	4.2	262	51	264.7	4.2	0.303145
16TO15_135.FIN2	495	3.56	0.0796	0.0028	0.01232	0.00017	0.24299	77.6	2.7	79	1.1	66	69	79	1.1	1.80412
16TO15_137.FIN2	125.4	1.073	0.0842	0.0049	0.01227	0.00026	0.011615	81.7	4.6	78.6	1.7	170	120	78.6	1.7	3.79437
16TO15_138.FIN2	258	1.491	0.3052	0.0093	0.0409	0.00062	0.40081	269.5	7.2	258.4	3.9	348	63	258.4	3.9	4.11874
16TO15_139.FIN2	173.6	1.557	0.0867	0.0047	0.01266	0.00022	0.087089	84.1	4.3	81.1	1.4	170	110	81.1	1.4	3.56718
16TO15_140.FIN2	283	1.907	0.0706	0.0047	0.0109	0.00025	0.029768	68.9	4.5	69.9	1.6	70	120	69.9	1.6	1.45138
16TO16_1.FIN2	175	0.881	0.225	0.0088	0.03191	0.00063	0.28371	205.5	7.3	202.5	4	262	84	202.5	4	1.45985
16TO16_2.FIN2	147	2.259	1.474	0.029	0.1549	0.0028	0.61083	920	12	928	16	905	39	905	39	2.54144
16TO16_3.FIN2	203	1.295	0.0911	0.0039	0.01381	0.00022	0.080457	88.3	3.6	88.4	1.4	103	84	88.4	1.4	0.11325
16TO16_4.FIN2	443	0.81	0.0956	0.0027	0.01458	0.00024	0.3236	92.6	2.5	93.3	1.5	102	58	93.3	1.5	0.75594
16TO16_5.FIN2	115.5	0.711	2.452	0.044	0.2074	0.0034	0.66396	1255	13	1214	18	1335	32	1335	32	9.06367
16TO16_6.FIN2	509	3.69	0.0793	0.0025	0.01221	0.00017	0.062673	77.4	2.4	78.3	1.1	67	66	78.3	1.1	1.16279
16TO16_7.FIN2	296	1.542	0.0901	0.0037	0.01305	0.00022	0.10931	87.4	3.5	83.6	1.4	187	85	83.6	1.4	4.34783
16TO16_8.FIN2	54.7	0.913	3.103	0.062	0.2479	0.0038	0.52095	1431	15	1427	19	1434	37	1434	37	0.488145
16TO16_9.FIN2	42.3	1.485	1.978	0.044	0.1888	0.0025	0.37371	1104	15	1115	14	1084	46	1084	46	2.85978
16TO16_10.FIN2	144	1.758	0.0874	0.0049	0.01279	0.00024	0.089243	84.7	4.6	81.9	1.5	170	110	81.9	1.5	3.30579
16TO16_11.FIN2	100	2.231	0.1056	0.0057	0.01528	0.00036	0.20844	101.4	5.2	97.7	2.3	190	110	97.7	2.3	3.64892
16TO16_12.FIN2	539	1.626	0.096	0.0026	0.01449	0.00019	0.023074	93	2.4	92.7	1.2	127	63	92.7	1.2	0.322581
16TO16_13.FIN2	142.2	1.478	0.097	0.011	0.01222	0.00053	0.28062	94	10	78.3	3.4	460	230	DISC	DISC	16.7021
16TO16_14.FIN2	210	7.9	0.764	0.038	0.0907	0.0039	0.6155	573	22	559	23	622	92	559	23	2.44328	Rim
16TO16_14.FIN2	69.3	2.283	1.214	0.047	0.131	0.0039	0.45872	805	21	793	22	830	76	793	22	1.49068	Core
16TO16_15.FIN2	208.8	1.705	0.2924	0.0071	0.04074	0.00057	0.39817	259.9	5.6	257.4	3.5	270	52	257.4	3.5	0.961908
16TO16_16.FIN2	68.1	1.812	0.096	0.012	0.01324	0.00051	0.39915	92	11	84.8	3.3	200	220	84.8	3.3	7.82609
16TO16_17.FIN2	164.7	1.002	0.0759	0.0039	0.01175	0.0002	0.063821	74	3.7	75.3	1.3	54	99	75.3	1.3	1.75676
16TO16_18.FIN2	300.2	0.995	0.08	0.003	0.01223	0.00021	0.19235	78	2.8	78.4	1.3	91	75	78.4	1.3	0.512821
16TO16_19.FIN2	307	2.159	0.076	0.003	0.0117	0.0002	0.21341	74.6	2.9	75	1.3	68	77	75	1.3	0.536193
16TO16_20.FIN2	250	2.21	0.0923	0.004	0.01411	0.00024	0.22252	89.4	3.7	90.3	1.5	73	81	90.3	1.5	1.00671
16TO16_21.FIN2	87.1	0.562	0.1771	0.0079	0.02588	0.00047	0.10872	165.5	7	164.7	3	182	91	164.7	3	0.483384
16TO16_22.FIN2	249	1.72	0.555	0.011	0.0712	0.0012	0.38295	447.2	7.1	443.3	7	456	48	443.3	7	0.872093
16TO16_23.FIN2	350	3.35	0.3143	0.0072	0.04394	0.00075	0.48317	276.9	5.5	277.1	4.6	262	49	277.1	4.6	0.0722282
16TO16_24.FIN2	261.1	8.09	0.0936	0.0035	0.01422	0.00023	0.12183	90.7	3.3	91	1.5	89	74	91	1.5	0.330761
16TO16_25.FIN2	259	2.376	0.104	0.0051	0.01514	0.0003	0.27112	100.1	4.6	96.8	1.9	155	85	96.8	1.9	3.2967
16TO16_26.FIN2	221.8	2.721	0.0833	0.0038	0.01248	0.00023	0.27944	81	3.6	80	1.4	102	82	80	1.4	1.23457
16TO16_27.FIN2	367	2.231	0.0871	0.0028	0.01313	0.0002	0.20779	84.7	2.6	84.1	1.2	104	64	84.1	1.2	0.708383
16TO16_28.FIN2	447	1.642	0.2965	0.0088	0.04129	0.00081	0.52857	263.3	6.9	260.8	5	266	60	260.8	5	0.949487
16TO16_29.FIN2	97.7	1.528	0.1648	0.0085	0.02461	0.0005	0.17411	154.8	7.5	156.7	3.1	126	97	156.7	3.1	1.22739
16TO16_30.FIN2	260	1.6	0.1035	0.005	0.01522	0.00032	0.21073	99.7	4.6	97.4	2	155	93	97.4	2	2.30692
16TO16_31.FIN2	655	2.15	0.0726	0.0024	0.01071	0.00016	0.31106	71.1	2.3	68.67	1	143	67	68.67	1	3.41772
16TO16_32.FIN2	177	1.582	0.2963	0.0098	0.04189	0.00058	0.22669	262.4	7.7	264.5	3.6	229	69	264.5	3.6	0.800305
16TO16_33.FIN2	470	1.155	0.2847	0.0061	0.04043	0.00056	0.45714	254	4.8	255.5	3.5	229	44	255.5	3.5	0.590551
16TO16_34.FIN2	327.1	4.253	0.0772	0.0031	0.01215	0.0002	0.31969	75.4	2.9	77.8	1.3	18	72	77.8	1.3	3.18302
16TO16_35.FIN2	577	2.958	0.0496	0.002	0.00771	0.00013	0.24698	49.1	1.9	49.51	0.81	54	75	49.51	0.81	0.835031
16TO16_36.FIN2	575	3	0.0842	0.0044	0.0127	0.00043	0.38913	82	4.1	81.4	2.7	131	100	81.4	2.7	0.731707	Rim
16TO16_36.FIN2	109.4	1.86	0.781	0.036	0.0952	0.003	0.5161	584	20	586	18	546	94	586	18	0.342466	Core
16TO16_37.FIN2	424	2.273	0.1031	0.0039	0.01534	0.00027	0.18786	99.4	3.5	98.1	1.7	134	74	98.1	1.7	1.30785
16TO16_38.FIN2	221	2.177	0.1003	0.0041	0.01545	0.00028	0.16947	97.3	3.7	98.8	1.8	77	80	98.8	1.8	1.54162
16TO16_39.FIN2	450	1.38	0.0739	0.0026	0.01104	0.00018	0.19183	72.3	2.4	70.8	1.2	128	70	70.8	1.2	2.07469
16TO16_40.FIN2	277.8	2.423	0.0836	0.0032	0.01211	0.0002	0.15203	81.3	3	77.6	1.3	175	78	77.6	1.3	4.55105
16TO16_41.FIN2	380.2	1.935	0.1658	0.0043	0.02389	0.00033	0.18724	155.5	3.7	152.2	2.1	201	57	152.2	2.1	2.12219
16TO16_42.FIN2	305	1.865	0.0813	0.0036	0.01244	0.00023	0.1693	79.2	3.4	79.7	1.5	85	83	79.7	1.5	0.631313
16TO16_43.FIN2	679	1.127	0.0524	0.0017	0.00784	0.00014	0.025501	51.8	1.7	50.33	0.87	132	75	50.33	0.87	2.83784
16TO16_44.FIN2	636	1.689	0.2931	0.0056	0.04069	0.00061	0.54874	260.6	4.4	257.1	3.8	284	41	257.1	3.8	1.34305
16TO16_45.FIN2	91.9	2.1	0.086	0.037	0.0131	0.0027	0.032593	83	34	84	17	100	780	DISC	DISC	1.20482	Rim
16TO16_45.FIN2	51.3	1.218	5.09	0.35	0.278	0.018	0.95666	1757	80	1559	97	2101	40	2101	40	25.7972	Core
16TO16_46.FIN2	301.9	3.47	0.0885	0.0031	0.01281	0.00021	0.14492	86	2.9	82	1.3	197	74	82	1.3	4.65116
16TO16_47.FIN2	297	2.147	3.716	0.059	0.2703	0.0035	0.73772	1574	13	1541	18	1613	26	1613	26	4.46373
16TO16_48.FIN2	154	1.54	0.1616	0.0071	0.02374	0.00041	0.1558	151.4	6.2	151.2	2.6	164	86	151.2	2.6	0.1321
16TO16_49.FIN2	1466	1.903	0.0761	0.0015	0.01156	0.00014	0.34484	74.4	1.5	74.08	0.87	87	43	74.08	0.87	0.430108
16TO16_50.FIN2	267	1.259	0.0943	0.0068	0.01373	0.00031	0.23132	91.1	6.3	87.9	1.9	150	130	87.9	1.9	3.51262
16TO16_51.FIN2	547	3.377	0.2803	0.0055	0.03984	0.00047	0.33793	250.6	4.3	251.8	2.9	234	44	251.8	2.9	0.478851
16TO16_52.FIN2	644	1.624	0.0591	0.0019	0.00922	0.00013	0.27227	58.3	1.8	59.13	0.86	37	62	59.13	0.86	1.42367
16TO16_53.FIN2	106.4	1.619	2.404	0.042	0.2099	0.0025	0.45988	1241	13	1228	13	1253	35	1253	35	1.99521
16TO16_54.FIN2	218	3.86	0.0918	0.004	0.0138	0.00024	0.14377	88.9	3.7	88.4	1.5	117	88	88.4	1.5	0.56243
16TO16_55.FIN2	214	2.62	1.552	0.04	0.1568	0.0032	0.83555	949	17	938	18	963	34	963	34	2.59605
16TO16_56.FIN2	138.5	1.842	3.065	0.057	0.244	0.0042	0.4961	1420	14	1406	22	1433	37	1433	37	1.88416
16TO16_57.FIN2	59.9	1.958	6.17	0.13	0.3632	0.0067	0.64966	1995	18	1994	32	1984	32	1984	32	0.504032
16TO16_58.FIN2	409	2.954	0.0778	0.0027	0.01184	0.00018	0.054845	76	2.5	75.9	1.1	88	71	75.9	1.1	0.131579
16TO16_59.FIN2	237	2.29	0.0878	0.0039	0.01344	0.00026	0.11422	85.3	3.6	86	1.7	77	86	86	1.7	0.820633
16TO16_60.FIN2	283.1	1.814	0.063	0.0031	0.00975	0.00019	0.17869	61.8	2.9	62.6	1.2	60	92	62.6	1.2	1.2945
16TO16_61.FIN2	299	3.32	0.555	0.011	0.0717	0.0012	0.53783	448.3	7.3	446.2	7.1	446	45	446.2	7.1	0.468436
[truncated: 1,770 more rows]

## Sheet: Core_rim
Sample Name:				2σ Prop		2σ Prop		207/235	2σ Prop	206/238	2σ Prop	207/206	2σ Prop	Best age	2σ Prop			Sample Name:				2σ Prop		2σ Prop		207/235	2σ Prop	206/238	2σ Prop	207/206	2σ Prop	Best age	2σ Prop
Grain #	[U] ppm	U/Th	207/235	error	206/238	error	RHO	Age Ma	error	Age (Ma)	error	Age (Ma)	error	(Ma)	error	% Discordance*	Rim/Core	Grain #	[U] ppm	U/Th	207/235	error	206/238	error	RHO	Age Ma	error	Age (Ma)	error	Age (Ma)	error	(Ma)	error	% Discordance*	Rim/Core
16To_02_53.FIN2	385	1.871	0.1014	0.0051	0.01565	0.00066	0.32685	98	4.7	100.1	4.2	120	110	100.1	4.2	2.14286	Rim	16To_02_53.FIN2	245.6	1.871	0.1253	0.0057	0.01846	0.00051	0.36189	120.3	5.1	117.9	3.2	119	82	117.9	3.2	1.99501	Core
16TO-03_70.FIN2	87.5	3.96	0.112	0.014	0.01616	0.00089	0.32869	107	13	103.3	5.6	200	230	103.3	5.6	3.45794	Rim	16TO-03_70.FIN2	141.8	2.164	0.174	0.013	0.02623	0.00083	0.33784	162	11	166.9	5.2	160	140	166.9	5.2	3.02469	Core
16To_04_39.FIN2	385	2.059	0.491	0.036	0.0634	0.0028	0.4223	404	25	396	17	422	150	396	17	1.9802	Rim	16To_04_39.FIN2	46.1	2.938	1.554	0.11	0.1587	0.0064	0.53103	951	47	949	36	950	140	950	140	0.105263	Core
16To_04_97.FIN2	317	1.933	0.0912	0.0064	0.01357	0.00045	0.32881	88.4	5.9	86.9	2.9	129	130	86.9	2.9	1.69683	Rim	16To_04_97.FIN2	250.8	2.382	0.181	0.016	0.0255	0.0012	0.39037	169	14	162.3	7.8	240	170	162.3	7.8	3.9645	Core
16To_04_99.FIN2	443	1.164	0.203	0.013	0.02863	0.00092	0.40007	187.4	11	182	5.7	209	130	182	5.7	2.88154	Rim	16To_04_99.FIN2	100.6	0.686	2.76	0.2	0.2234	0.01	0.79297	1339	54	1299	54	1389	110	1389	110	6.47948	Core
16To_04_135.FIN2	164	1.81	0.088	0.012	0.01341	0.001	0.47147	85.5	11	85.8	6.4	170	230	85.8	6.4	0.350877	Rim	16To_04_135.FIN2	113.2	2.372	1.945	0.12	0.1698	0.0061	0.65176	1094	40	1010	34	1241	110	1241	110	18.614	Core
16To_05_63.FIN2	1590	6.2	0.2726	0.018	0.0391	0.0014	0.66184	246.6	13	247.5	9	247	140	247.5	9	0.364964	Rim	16To_05_63.FIN2	240	1.81	3.563	0.21	0.2706	0.0079	0.6974	1539	47	1543	40	1568	100	1568	100	1.59439	Core
16To_06_18.FIN2	542	46	0.545	0.044	0.0698	0.0041	0.95917	442	28	435	25	490	89	435	25	1.58371	Rim	16To_06_18.FIN2	60.3	1.546	1.677	0.068	0.1667	0.0049	0.25735	1002	26	993	27	1033	77	1033	77	3.87222	Core
16To_06_20.FIN2	136.4	1.075	0.0919	0.0075	0.01418	0.00059	0.17647	88.9	7	90.7	3.7	40	140	90.7	3.7	2.02475	Rim	16To_06_20.FIN2	304	0.897	2.33	0.2	0.188	0.014	0.97396	1213	66	1107	80	1430	75	1430	75	22.5874	Core
16To_06_34.FIN2	563	3.295	1.612	0.061	0.1651	0.0052	0.56772	974	23	985	29	969	68	969	68	1.65119	Rim	16To_06_34.FIN2	248.5	1.364	2.108	0.086	0.1935	0.0068	0.70625	1149	28	1140	37	1188	66	1188	66	4.0404	Core
16To_06_55.FIN2	227.9	1.76	0.0792	0.0044	0.01163	0.0004	0.27134	77.3	4.1	74.5	2.5	172	110	74.5	2.5	3.62225	Rim	16To_06_55.FIN2	331	1.256	0.32	0.026	0.0431	0.0025	0.63115	281	20	272	15	330	150	272	15	3.20285	Core
16To_06_58.FIN2	62.8	1.12	0.064	0.016	0.00961	0.00093	0.38677	62	15	61.6	5.9	80	380	61.6	5.9	0.645161	Rim	16To_06_58.FIN2	49.2	1.239	1.597	0.092	0.1523	0.0084	0.68599	972	39	918	49	1110	100	1110	100	17.2973	Core
16To_06_90.FIN2	397.4	1.284	0.063	0.0038	0.00951	0.00033	0.047143	61.9	3.7	61	2.1	110	120	61	2.1	1.45396	Rim	16To_06_90.FIN2	988	0.74	1.392	0.058	0.1328	0.0046	0.79241	885	25	804	26	1108	70	804	26	9.15254	Core
16To_06_102.FIN2	1110	2.004	0.297	0.014	0.04029	0.0014	0.58834	263.7	11	254.6	8.4	340	89	254.6	8.4	3.45089	Rim	16To_06_102.FIN2	160.3	3.472	3.88	0.17	0.2809	0.0095	0.64227	1606	35	1595	48	1633	65	1633	65	2.32701	Core
16TO-07_3.FIN2	453	1.7	0.644	0.028	0.0764	0.0032	0.57339	503	17	474	19	547	84	474	19	5.76541	Rim	16TO-07_3.FIN2	270	1.321	1.633	0.062	0.1456	0.0044	0.50627	990	21	876	24	1217	52	1217	52	28.0197	Core
16To_09_74.FIN2	380	7.64	0.639	0.028	0.0805	0.0028	0.52487	501.7	17	499	17	496	71	499	17	0.53817	Rim	16To_09_74.FIN2	388	3.751	2.401	0.092	0.2097	0.0065	0.85126	1242	28	1227	35	1237	47	1237	47	0.808407	Core
16To_09_126.FIN2	950	6.1	0.1187	0.0058	0.01717	0.00066	0.44985	113.9	5.2	109.8	4.2	212	80	109.8	4.2	3.59965	Rim	16To_09_126.FIN2	303	1.272	0.1518	0.0065	0.02282	0.00068	0.29211	143.7	5.7	145.4	4.3	172	72	145.4	4.3	1.18302	Core
16To_09_133.FIN2	500	1.29	1.8	0.068	0.1816	0.0054	0.67937	1044.9	25	1076	29	1018	52	1018	52	5.69745	Rim	16To_09_133.FIN2	182.4	2.031	2.295	0.088	0.2116	0.0062	0.64492	1211	27	1237	33	1162	52	1162	52	6.45439	Core
16TO10_51.FIN2	489	1.95	0.1024	0.0067	0.01415	0.00038	0.18964	98.8	6.1	90.6	2.4	310	130	90.6	2.4	8.2996	Rim	16TO10_51.FIN2	451	3.12	2.608	0.063	0.2144	0.0038	0.78759	1301	18	1252	20	1407	39	1407	39	11.0163	Core
16TO10_67.FIN2	74	2.438	0.114	0.014	0.01486	0.00062	0.10883	108	12	95.1	3.9	350	230	95.1	3.9	11.9444	Rim	16TO10_67.FIN2	70.9	1.552	0.149	0.013	0.02266	0.00084	0.13152	140	12	144.4	5.3	130	180	144.4	5.3	3.14286	Core
16TO-11_21.FIN2	813	3.42	0.0956	0.004	0.01416	0.00042	0.31759	92.6	3.7	90.6	2.6	127	85	90.6	2.6	2.15983	Rim	16TO-11_21.FIN2	596	1.956	0.1629	0.0085	0.02395	0.00073	0.048659	153.1	7.4	152.6	4.6	150	130	152.6	4.6	0.326584	Core
16TO-11_116.FIN2	479	5.71	0.36	0.029	0.0435	0.0026	0.2117	311	21	274	16	580	180	274	16	11.8971	Rim	16TO-11_116.FIN2	368.4	9.01	3.37	0.11	0.2588	0.0086	0.7127	1493	25	1481	44	1537	47	1537	47	3.64346	Core
16To_12_21.FIN2	311	23	0.612	0.035	0.0783	0.0052	0.66125	484	22	486	31	561	100	486	31	0.413223	Rim	16To_12_21.FIN2	139.4	1.775	1.612	0.06	0.1605	0.0047	0.33559	976	23	959	26	994	68	994	68	3.52113	Core
16To_13_42.FIN2	149.2	1.214	0.0941	0.0056	0.01493	0.00049	0.099735	91.6	5.1	95.5	3.1	57	110	95.5	3.1	4.25764	Rim	16To_13_42.FIN2	319	1.108	0.1911	0.01	0.02787	0.00092	0.44474	177.4	8.8	177.2	5.8	143	91	177.2	5.8	0.11274	Core
16To_13_84.FIN2	55.4	2.144	0.0699	0.0089	0.01137	0.00052	0.042245	68.1	8.4	72.9	3.3	-60	210	72.9	3.3	7.04846	Rim	16To_13_84.FIN2	306	6.19	0.1828	0.0095	0.02655	0.001	0.66019	172.1	8.7	168.9	6.4	218	77	168.9	6.4	1.85938	Core
16To_13_116.FIN2	261	1.405	1.583	0.062	0.1533	0.0055	0.68116	970	25	919	31	1136	62	1136	62	19.1021	Rim	16To_13_116.FIN2	27.31	1.809	4.096	0.13	0.308	0.0084	0.60208	1652	27	1729	42	1605	49	1605	49	7.72586	Core
16To_13_120.FIN2	563	70.6	0.606	0.02	0.0792	0.002	0.64884	480.5	13	491.2	12	484	57	491.2	12	2.22685	Rim	16To_13_120.FIN2	160.4	1.703	2.013	0.068	0.1943	0.005	0.82896	1119	23	1144	27	1088	51	1088	51	5.14706	Core
16TO14_23.FIN2	414	6.31	0.441	0.025	0.0562	0.0018	0.041169	371	18	353	11	470	150	353	11	4.85175	Rim	16TO14_23.FIN2	978	52.6	1.714	0.048	0.1586	0.0037	0.93349	1011	19	948	21	1170	38	1170	38	18.9744	Core
16TO14_55.FIN2	995	4.05	0.599	0.031	0.0743	0.0046	0.45378	476	20	462	28	550	140	462	28	2.94118	Rim	16TO14_55.FIN2	471	1.682	1.464	0.043	0.142	0.003	0.86825	912	18	856	17	1048	42	1048	42	18.3206	Core
16TO14_136.FIN2	1161	32.8	1.715	0.046	0.165	0.0042	0.79251	1013	18	984	23	1067	44	1067	44	7.77882	Rim	16TO14_136.FIN2	613	3.11	3.99	0.13	0.2747	0.0074	0.92442	1627	26	1563	38	1705	37	1705	37	8.32845	Core
16TO15_36.FIN2	932	210	4.56	0.14	0.309	0.0082	0.74039	1740	25	1735	40	1750	40	1750	40	0.857143	Rim	16TO15_36.FIN2	214.7	2.35	11.73	0.22	0.493	0.0072	0.72499	2580	17	2582	31	2576	25	2576	25	0.232919	Core
16TO15_37.FIN2	268	2.375	0.0894	0.008	0.0142	0.00043	0.25525	86.7	7.4	90.9	2.7	0	160	90.9	2.7	4.84429	Rim	16TO15_37.FIN2	607	2.235	0.1625	0.0059	0.02397	0.00059	0.49462	152.6	5.1	152.7	3.7	142	74	152.7	3.7	0.0655308	Core
16TO15_51.FIN2	378	2.81	0.088	0.01	0.01365	0.00075	0.38172	85.1	9.7	87.4	4.8	20	210	87.4	4.8	2.7027	Rim	16TO15_51.FIN2	1260	19.2	3.32	0.11	0.2494	0.0068	0.9379	1478	26	1433	36	1547	28	1547	28	7.3691	Core
16TO15_77.FIN2	489	7.6	0.559	0.033	0.0691	0.003	0.37539	450	22	431	18	560	130	431	18	4.22222	Rim	16TO15_77.FIN2	145	4.63	4.44	0.11	0.2953	0.0061	0.82873	1714	21	1666	30	1779	31	1779	31	6.35188	Core
16TO15_85.FIN2	1230	14.8	0.1884	0.0056	0.02684	0.00053	0.42884	175	4.7	170.7	3.3	251	60	170.7	3.3	2.45714	Rim	16TO15_85.FIN2	173	1.333	0.522	0.029	0.0676	0.0029	0.73573	425	19	421	18	442	86	421	18	0.941176	Core
16TO15_89.FIN2	243	2.13	0.097	0.012	0.0132	0.00092	0.11175	93	11	84.5	5.9	320	260	84.5	5.9	9.13978	Rim	16TO15_89.FIN2	531	4.25	0.1548	0.005	0.02287	0.00043	0.5422	145.8	4.4	145.7	2.7	149	55	145.7	2.7	0.0685871	Core
16TO15_119.FIN2	183	1.89	0.0804	0.0095	0.01128	0.00064	0.24764	78.2	8.9	72.3	4	240	240	72.3	4	7.54476	Rim	16TO15_119.FIN2	137.1	1.366	0.857	0.029	0.1018	0.0021	0.40754	626	16	625	12	622	71	625	12	0.159744	Core
16TO15_129.FIN2	132	3.62	0.0955	0.0084	0.01389	0.00041	0.064059	91.9	7.7	88.9	2.6	160	160	88.9	2.6	3.26442	Rim	16TO15_129.FIN2	182.1	2.63	0.146	0.011	0.02105	0.00068	0.075712	138.1	9.5	134.3	4.3	200	150	134.3	4.3	2.75163	Core
16TO15_130.FIN2	309	4.61	0.0863	0.0049	0.01348	0.00033	0.22806	83.9	4.6	86.3	2.1	50	110	86.3	2.1	2.86055	Rim	16TO15_130.FIN2	140	1.67	0.145	0.014	0.0213	0.0012	0.17408	137	12	135.7	7.5	160	190	135.7	7.5	0.948905	Core
16TO16_14.FIN2	210	7.9	0.764	0.038	0.0907	0.0039	0.6155	573	22	559	23	622	92	559	23	2.44328	Rim	16TO16_14.FIN2	69.3	2.283	1.214	0.047	0.131	0.0039	0.45872	805	21	793	22	830	76	793	22	1.49068	Core
16TO16_36.FIN2	575	3	0.0842	0.0044	0.0127	0.00043	0.38913	82	4.1	81.4	2.7	131	100	81.4	2.7	0.731707	Rim	16TO16_36.FIN2	109.4	1.86	0.781	0.036	0.0952	0.003	0.5161	584	20	586	18	546	94	586	18	0.342466	Core
16TO16_89.FIN2	588	2.35	0.0898	0.0091	0.01293	0.00073	0.52215	87.1	8.4	82.8	4.6	200	170	82.8	4.6	4.93685	Rim	16TO16_89.FIN2	821	11.78	0.1601	0.0049	0.02337	0.00048	0.57609	150.6	4.3	148.9	3	173	56	148.9	3	1.12882	Core
16TO16_95.FIN2	628	1.52	0.0588	0.0078	0.0088	0.00058	0.14398	58	7.5	56.4	3.7	160	300	56.4	3.7	2.75862	Rim	16TO16_95.FIN2	520	1.548	2.914	0.051	0.2335	0.0037	0.77742	1385	14	1352	19	1436	27	1436	27	5.84958	Core
16TO16_107.FIN2	193.1	1.556	0.593	0.022	0.0763	0.0018	0.17796	472	14	474	11	447	89	474	11	0.423729	Rim	16TO16_107.FIN2	219.6	3.53	1.895	0.082	0.1763	0.0059	0.90865	1071	29	1045	32	1134	43	1134	43	7.84832	Core
16TO16_121.FIN2	321	22.4	0.694	0.036	0.0858	0.0033	0.74036	533	22	530	19	543	76	530	19	0.562852	Rim	16TO16_121.FIN2	383.9	22	2.81	0.15	0.1993	0.0078	0.94187	1343	41	1169	42	1640	44	1640	44	28.7195	Core
16TO17_65.FIN2	1027	18.5	3.38	0.17	0.2582	0.0098	0.92815	1497	39	1480	50	1525	40	1525	40	2.95082	Rim	16TO17_65.FIN2	476	3.8	4.76	0.077	0.3246	0.0051	0.62413	1776	14	1811	25	1743	30	1743	30	3.90132	Core
16TO17_68.FIN2	1320	18.6	3.07	0.12	0.2499	0.0099	0.72976	1423	30	1437	51	1408	58	1408	58	2.05966	Rim	16TO17_68.FIN2	316	1.79	4.252	0.087	0.2999	0.0051	0.8048	1680	17	1689	25	1676	28	1676	28	0.775656	Core
16TO17_97.FIN2	1315	51.5	3.09	0.11	0.2492	0.0074	0.57237	1430	26	1434	38	1428	58	1428	58	0.420168	Rim	16TO17_97.FIN2	524	2.92	4.199	0.061	0.2968	0.0044	0.69773	1672	12	1674	22	1680	28	1680	28	0.357143	Core
16TO18_8.FIN2	273	3.78	0.0891	0.0089	0.013	0.001	0.43348	86.5	8.3	83.4	6.5	170	180	83.4	6.5	3.58382	Rim	16TO18_8.FIN2	1098	1.472	0.1535	0.004	0.02248	0.00043	0.46405	144.9	3.5	143.3	2.7	158	53	143.3	2.7	1.10421	Core
16TO18_16.FIN2	940	3.83	0.296	0.023	0.0402	0.002	0.31905	262	18	254	13	320	170	254	13	3.05344	Rim	16TO18_16.FIN2	953	15.57	3.627	0.08	0.2385	0.0054	0.76985	1554	17	1377	28	1806	34	1806	34	23.7542	Core
16TO18_30.FIN2	412	7.9	0.323	0.03	0.0444	0.0026	0.4875	283	23	280	16	280	160	280	16	1.06007	Rim	16TO18_30.FIN2	311.7	1.637	3.362	0.081	0.2471	0.005	0.76209	1491	19	1422	26	1589	32	1589	32	10.5098	Core
16TO18_42.FIN2	640	2.331	0.0957	0.0048	0.01386	0.00045	0.4712	92.6	4.5	88.7	2.9	200	92	88.7	2.9	4.21166	Rim	16TO18_42.FIN2	543	2.078	0.1345	0.007	0.01888	0.00075	0.42394	128	6.3	120.5	4.7	260	110	120.5	4.7	5.85938	Core
16TO18_54.FIN2	714	3.28	0.0951	0.0035	0.01399	0.00044	0.24399	92.1	3.2	89.5	2.8	166	85	89.5	2.8	2.82302	Rim	16TO18_54.FIN2	654	2.056	0.1497	0.0062	0.02164	0.00073	0.58981	141.5	5.4	138	4.6	211	82	138	4.6	2.4735	Core
16TO18_117.FIN2	308	40.5	0.1052	0.0066	0.0156	0.00081	0.38628	101.2	6.1	99.7	5.1	190	130	99.7	5.1	1.48221	Rim	16TO18_117.FIN2	104	2.276	0.154	0.012	0.02231	0.00058	0.25622	144	11	142.2	3.6	180	150	142.2	3.6	1.25	Core
16TO18_127.FIN2	139.7	3.038	0.1074	0.0074	0.01571	0.00051	0.17271	103.1	6.8	100.5	3.2	140	130	100.5	3.2	2.52182	Rim	16TO18_127.FIN2	494	2.382	0.1559	0.0073	0.02307	0.00067	0.27917	146.8	6.4	147	4.2	157	98	147	4.2	0.13624	Core
16TO18_129.FIN2	242	1.283	0.458	0.026	0.0611	0.0019	0.53057	381	18	382	11	360	100	382	11	0.262467	Rim	16TO18_129.FIN2	80.1	2.55	2.35	0.15	0.194	0.011	0.87507	1205	47	1136	59	1368	58	1368	58	16.9591	Core
16TO19_13.FIN2	286.9	24.7	0.562	0.019	0.0717	0.0017	0.63832	453	12	446	10	460	57	446	10	1.54525	Rim	16TO19_13.FIN2	218.8	7.94	0.9	0.025	0.099	0.002	0.43323	653	14	608	12	797	59	608	12	6.89127	Core
16TO19_16.FIN2	210	4.17	0.561	0.027	0.073	0.0018	0.63938	451	17	454	11	421	90	454	11	0.665188	Rim	16TO19_16.FIN2	308	54	1.96	0.073	0.1806	0.0048	0.88612	1095	26	1069	26	1137	40	1137	40	5.98065	Core
16TO19_18.FIN2	630	1.668	0.274	0.018	0.0375	0.0017	0.71774	245	15	237	10	300	110	237	10	3.26531	Rim	16TO19_18.FIN2	799	17.3	0.765	0.021	0.0922	0.0024	0.78611	576	12	568	14	600	41	568	14	1.38889	Core
16TO19_36.FIN2	385	1.405	0.0784	0.0045	0.01248	0.00051	0.26555	76.6	4.3	79.9	3.2	50	120	79.9	3.2	4.30809	Rim	16TO19_36.FIN2	97.2	1.674	1.552	0.052	0.1576	0.0038	0.67155	947	21	943	21	941	54	941	54	0.21254	Core
16TO19_54.FIN2	480	2.97	1.81	0.11	0.1734	0.0091	0.86673	1045	40	1030	50	1069	66	1069	66	3.64827	Rim	16TO19_54.FIN2	290	1.453	3.865	0.073	0.2683	0.0043	0.76299	1604	15	1531	22	1689	26	1689	26	9.35465	Core
16TO19_77.FIN2	1371	91	3.13	0.14	0.2516	0.0082	0.84114	1435	34	1460	50	1407	51	1407	51	3.76688	Rim	16TO19_77.FIN2	347	2.182	4.354	0.079	0.304	0.0058	0.72939	1701	15	1709	29	1701	28	1701	28	0.470312	Core
16TO19_126.FIN2	920	12.2	0.558	0.041	0.0727	0.006	0.76524	449	27	452	36	430	120	452	36	0.668151	Rim	16TO19_126.FIN2	189.7	1.148	2.29	0.053	0.2065	0.004	0.69956	1205	16	1209	22	1176	36	1176	36	2.80612	Core
16TO20_11.FIN2	596	13.6	3.08	0.26	0.223	0.01	0.87419	1408	67	1297	53	1570	100	1570	100	17.3885	Rim	16TO20_11.FIN2	105.9	1.45	11.46	0.26	0.4701	0.0087	0.71922	2562	20	2481	38	2621	28	2621	28	5.34147	Core
16TO20_17.FIN2	375	3.16	2.356	0.065	0.2124	0.0056	0.77235	1227	20	1240	30	1225	38	1225	38	1.22449	Rim	16TO20_17.FIN2	120.2	1.577	3.137	0.076	0.2559	0.005	0.55278	1439	19	1467	26	1415	42	1415	42	3.67491	Core
16TO20_18.FIN2	238	1.463	0.0783	0.008	0.01105	0.00046	0.2694	76.4	7.5	70.9	2.9	270	210	70.9	2.9	7.19895	Rim	16TO20_18.FIN2	132.3	1.386	2.884	0.096	0.2191	0.0062	0.85704	1376	25	1274	33	1545	35	1545	35	17.5405	Core
16TO20_65.FIN2	579	3.1	4.52	0.3	0.271	0.013	0.87611	1727	52	1544	64	1972	58	1972	58	21.7039	Rim	16TO20_65.FIN2	92.7	0.46	8.52	0.17	0.426	0.0066	0.5882	2287	19	2286	30	2300	30	2300	30	0.608696	Core
16TO20_89.FIN2	518	7.1	0.2199	0.0073	0.03155	0.00055	0.30436	201.4	6.1	200.2	3.5	222	69	200.2	3.5	0.595829	Rim	16TO20_89.FIN2	297.3	3.17	0.299	0.011	0.041	0.0011	0.26534	265.5	8.2	258.8	7	337	83	258.8	7	2.52354	Core
16TO21_36.FIN2	850	43.7	0.618	0.037	0.0764	0.0042	0.89206	488	23	475	25	534	65	475	25	2.66393	Rim	16TO21_36.FIN2	197.4	2.264	2.113	0.047	0.1941	0.003	0.75222	1150	15	1143	16	1163	34	1163	34	1.71969	Core
16TO21_43.FIN2	398	34.4	0.571	0.019	0.0736	0.0016	0.47914	458	12	457.5	9.6	453	65	457.5	9.6	0.10917	Rim	16TO21_43.FIN2	109.7	3	1.474	0.064	0.1486	0.0045	0.69849	916	26	893	25	969	66	969	66	7.84314	Core
16TO21_63.FIN2	686	20	3.302	0.09	0.2592	0.0055	0.61495	1482	23	1485	28	1486	43	1486	43	0.0672948	Rim	16TO21_63.FIN2	275	2.66	4.46	0.12	0.3099	0.0061	0.77875	1720	22	1739	30	1698	34	1698	34	2.41461	Core
16TO21_77.FIN2	685	2.24	0.0949	0.0045	0.01304	0.00029	0.095405	91.9	4.2	83.5	1.8	299	100	83.5	1.8	9.14037	Rim	16TO21_77.FIN2	294.5	5.05	0.506	0.027	0.0633	0.0028	0.79668	414	18	395	17	507	76	395	17	4.58937	Core
16TO21_132.FIN2	882	78.8	0.215	0.02	0.0309	0.0016	0.17829	198	17	196.2	9.8	190	200	196.2	9.8	0.909091	Rim	16TO21_132.FIN2	505	3.122	2.418	0.079	0.183	0.0051	0.93002	1240	24	1082	28	1531	29	1531	29	29.3272	Core
16TO22_36.FIN2	1490	1.642	0.2446	0.0053	0.03523	0.0004	0.13794	222.5	4.2	223.2	2.5	266	45	223.2	2.5	0.314607	Rim	16TO22_36.FIN2	390	16.1	2.435	0.096	0.213	0.012	0.80551	1252	28	1242	62	1353	73	1353	73	8.20399	Core
16TO22_118.FIN2	1200	28.5	3.863	0.1	0.283	0.0055	0.68091	1604	21	1606	28	1583	38	1583	38	1.45294	Rim	16TO22_118.FIN2	332	0.499	7.16	0.23	0.396	0.01	0.83398	2124	29	2146	47	2109	35	2109	35	1.75439	Core
18TO01_44.FIN2	144.1	2.225	0.098	0.012	0.01432	0.00071	0.35403	94	11	91.7	4.5	200	270	91.7	4.5	2.44681	Rim	18TO01_44.FIN2	374.8	11.79	2.547	0.075	0.2072	0.0056	0.93509	1282	22	1213	30	1416	18	1416	18	14.3362	Core
18TO01_46.FIN2	258	1.322	0.54	0.039	0.07	0.0034	0.74526	437	26	436	20	450	120	436	20	0.228833	Rim	18TO01_46.FIN2	88.2	2.45	1.64	0.04	0.1671	0.003	0.26219	984	16	996	16	962	41	962	41	3.5343	Core
18TO01_114.FIN2	526	27.2	0.604	0.026	0.0774	0.002	0.77468	479	16	481	12	451	65	481	12	0.417537	Rim	18TO01_114.FIN2	169.3	2.323	1.715	0.043	0.1693	0.0033	0.53745	1013	16	1008	18	1031	36	1031	36	2.23084	Core
18TO02_14.FIN2	991	12	2.561	0.086	0.2227	0.0081	0.96716	1289	25	1296	43	1279	22	1279	22	1.32916	Rim	18TO02_14.FIN2	221	1.622	4.088	0.065	0.2905	0.0043	0.52659	1650.8	13	1644	21	1656	19	1656	19	0.724638	Core
18TO02_16.FIN2	601	4.62	0.297	0.018	0.04085	0.00091	0.01647	264	14	258.1	5.6	300	140	258.1	5.6	2.23485	Rim	18TO02_16.FIN2	182.5	1.381	1.572	0.032	0.1486	0.0022	0.36423	958	13	893.2	12	1103	33	1103	33	19.0209	Core
18TO02_51.FIN2	411	3.95	0.0946	0.0057	0.01373	0.00046	0.32687	91.7	5.2	87.9	2.9	190	120	87.9	2.9	4.14395	Rim	18TO02_51.FIN2	357	2.54	3.34	0.11	0.233	0.0068	0.8751	1486	26	1349	36	1680	24	1680	24	19.7024	Core
18TO02_57.FIN2	266	7.8	0.572	0.018	0.0732	0.0015	0.39181	459	12	455.3	9	473	62	455.3	9	0.8061	Rim	18TO02_57.FIN2	212.7	2.746	1.402	0.036	0.1354	0.0027	0.66938	889	15	818	16	1068	35	818	16	7.9865	Core
18TO02_88.FIN2	180.9	1.705	0.0892	0.0054	0.01281	0.00033	0.080906	86.5	5.1	82.1	2.1	210	130	82.1	2.1	5.08671	Rim	18TO02_88.FIN2	1032	1.688	0.1484	0.0069	0.02199	0.00056	0.060395	140.5	6.1	140.2	3.6	150	110	140.2	3.6	0.213523	Core
18TO02_129.FIN2	521	1.608	0.0873	0.0034	0.0125	0.00026	0.021583	84.9	3.2	80.1	1.7	229	86	80.1	1.7	5.65371	Rim	18TO02_129.FIN2	1051	1.428	0.1032	0.0034	0.01561	0.00025	0.2901	99.6	3.1	99.8	1.6	107	61	99.8	1.6	0.200803	Core
18TO03_14.FIN2	276.6	35	1.932	0.043	0.1837	0.0034	0.040291	1092	15	1087	19	1100	47	1100	47	1.18182	Rim	18TO03_14.FIN2	98.6	2.229	2.914	0.065	0.2395	0.0038	0.089831	1384	17	1384	20	1379	40	1379	40	0.362582	Core
18TO03_18.FIN2	258	1.646	0.571	0.018	0.0736	0.0014	0.18398	458	11	457.8	8.3	463	68	457.8	8.3	0.0436681	Rim	18TO03_18.FIN2	56.93	2.79	1.694	0.058	0.1563	0.0038	0.4093	1004	22	936	21	1149	63	1149	63	18.5379	Core
18TO03_49.FIN2	459	17.6	0.552	0.016	0.07101	0.0013	0.14402	446.1	11	442.2	7.7	460	70	442.2	7.7	0.874243	Rim	18TO03_49.FIN2	236	2.325	1.652	0.029	0.1633	0.0023	0.36634	989.2	11	974.8	13	1009	26	1009	26	3.38949	Core
18TO03_51.FIN2	325	2.74	0.472	0.017	0.0591	0.0015	0.17298	392	12	370.1	9.2	508	85	370.1	9.2	5.58673	Rim	18TO03_51.FIN2	294	5.38	1.602	0.036	0.1605	0.0029	0.67077	970	14	960	16	980	30	980	30	2.04082	Core
18TO03_64.FIN2	501	2.15	1.578	0.034	0.1481	0.0029	0.24599	961	13	890	16	1121	41	1121	41	20.6066	Rim	18TO03_64.FIN2	189	0.904	4.335	0.11	0.2987	0.0062	0.89079	1697	20	1684	30	1708	24	1708	24	1.40515	Core
18TO03_74.FIN2	2270	21.5	0.339	0.024	0.0427	0.0015	0.74641	297	18	269.8	9	510	120	269.8	9	9.15825	Rim	18TO03_74.FIN2	424	1.0294	3.019	0.05	0.2438	0.0038	0.78143	1411.4	13	1406	20	1420	17	1420	17	0.985915	Core
18TO03_101.FIN2	496	19.9	0.567	0.021	0.07264	0.0013	0.054406	455	14	452	7.7	459	81	452	7.7	0.659341	Rim	18TO03_101.FIN2	265	4.26	1.445	0.029	0.1475	0.0022	0.48514	909	13	887	12	952	33	952	33	6.82773	Core
18TO03_112.FIN2	391	6.99	0.315	0.02	0.0423	0.0013	0.42613	278	15	267.1	7.9	360	120	267.1	7.9	3.92086	Rim	18TO03_112.FIN2	48.79	1.144	3.171	0.076	0.2457	0.0045	0.29068	1447	18	1416	24	1488	41	1488	41	4.83871	Core
18TO03_119.FIN2	587	2.022	0.085	0.0053	0.01301	0.00042	0.37871	82.7	5	83.3	2.7	130	140	83.3	2.7	0.725514	Rim	18TO03_119.FIN2	628	1.367	0.1567	0.0052	0.02287	0.00037	0.19171	147.7	4.5	145.8	2.3	177	72	145.8	2.3	1.28639	Core
18TO03_130.FIN2	622	1.056	0.081	0.0058	0.0122	0.00039	0.47078	79	5.4	78.1	2.5	90	120	78.1	2.5	1.13924	Rim	18TO03_130.FIN2	279	2.4	0.803	0.019	0.0968	0.0019	0.59082	598.6	11	595.2	11	607	38	595.2	11	0.567992	Core
18TO03_135.FIN2	372	1.478	0.0898	0.0069	0.01291	0.00032	0.37652	87.1	6.4	82.7	2	260	160	82.7	2	5.05166	Rim	18TO03_135.FIN2	312	0.603	4.998	0.1	0.3165	0.0061	0.87673	1817	18	1772	30	1873	18	1873	18	5.39242	Core
18TO04_12.FIN2	1141	19.4	1.656	0.033	0.1618	0.0026	0.70577	991.6	13	966.7	14	1037	22	1037	22	6.77917	Rim	18TO04_12.FIN2	328	4.05	2.567	0.056	0.224	0.0035	0.52819	1291	16	1303	19	1266	28	1266	28	2.92259	Core
18TO04_106.FIN2	377	3.96	0.701	0.017	0.08789	0.0014	0.29269	538.7	10	543	8.1	531	41	543	8.1	0.798218	Rim	18TO04_106.FIN2	205.8	1.86	0.836	0.023	0.0999	0.0017	0.13623	618.2	12	613.9	9.7	631	53	613.9	9.7	0.695568	Core
18TO04_112.FIN2	1030	2.19	0.0901	0.0035	0.01326	0.00025	0.16741	87.6	3.3	84.9	1.6	174	75	84.9	1.6	3.08219	Rim	18TO04_112.FIN2	146.9	1.542	0.1105	0.007	0.01718	0.00037	0.22748	106	6.4	109.8	2.3	80	110	109.8	2.3	3.58491	Core
18TO04_119.FIN2	1468	3.87	0.0877	0.0033	0.01286	0.00037	0.010717	85.3	3.1	82.4	2.4	178	78	82.4	2.4	3.39977	Rim	18TO04_119.FIN2	60.1	0.718	2.428	0.075	0.2119	0.0053	0.20683	1250	22	1238	28	1299	65	1299	65	4.69592	Core
18TO05_8.FIN2	364	1.79	0.091	0.013	0.01389	0.00078	0.39697	88	12	88.9	5	80	250	88.9	5	1.02273	Rim	18TO05_8.FIN2	572.5	2.461	2.105	0.042	0.1934	0.0035	0.8222	1149.3	14	1139	19	1174	16	1174	16	2.98126	Core
18TO05_15.FIN2	373	2.05	0.0874	0.0043	0.01318	0.00028	0.092219	84.9	4	84.4	1.8	107	92	84.4	1.8	0.588928	Rim	18TO05_15.FIN2	215.1	1.88	2.84	0.14	0.2076	0.01	0.96664	1365	37	1213	54	1617	28	1617	28	24.9845	Core
18TO05_42.FIN2	694	29.8	0.53	0.026	0.0672	0.0029	0.47056	431	18	419	18	495	93	419	18	2.78422	Rim	18TO05_42.FIN2	51.7	2.18	1.733	0.055	0.1702	0.0034	0.2436	1019	21	1013	19	1005	55	1005	55	0.79602	Core
18TO05_46.FIN2	370	4.21	0.0761	0.0071	0.01249	0.00045	0.30296	74.3	6.7	80	2.8	-50	180	80	2.8	7.6716	Rim	18TO05_46.FIN2	50	4.28	0.153	0.015	0.02426	0.00089	0.13861	142	13	155.2	5.8	70	170	155.2	5.8	9.29577	Core
18TO05_55.FIN2	968	2.241	0.563	0.017	0.072	0.0019	0.64393	453.3	11	448.3	11	465	48	448.3	11	1.10302	Rim	18TO05_55.FIN2	52.2	1.763	1.933	0.066	0.1821	0.004	0.28351	1089	23	1078	22	1102	63	1102	63	2.17786	Core
18TO05_83.FIN2	340	1.532	0.0889	0.0063	0.01289	0.00036	0.35529	86.3	5.9	82.5	2.3	230	140	82.5	2.3	4.40324	Rim	18TO05_83.FIN2	379	1.793	0.1073	0.0043	0.01612	0.00033	0.030502	103.3	4	103.1	2.1	124	83	103.1	2.1	0.193611	Core
18TO06_23.FIN2	817	7.9	0.0807	0.0038	0.01204	0.00025	0.18721	78.8	3.6	77.1	1.6	132	90	77.1	1.6	2.15736	Rim	18TO06_23.FIN2	1122	4.7	0.1379	0.004	0.02025	0.00034	0.2237	131.2	3.6	129.2	2.1	165	55	129.2	2.1	1.52439	Core
18TO06_30.FIN2	560	2.8	2.45	0.17	0.2157	0.0079	0.7748	1256	50	1259	42	1259	89	1259	89	0	Rim	18TO06_30.FIN2	178.7	0.375	4.361	0.094	0.2956	0.005	0.75104	1703	18	1669	25	1746	22	1746	22	4.41008	Core
18TO06_126.FIN2	128.5	0.817	0.0982	0.0069	0.01414	0.00041	0.19101	94.8	6.3	90.5	2.6	180	130	90.5	2.6	4.53586	Rim	18TO06_126.FIN2	652.2	2.09	3.506	0.066	0.2738	0.0043	0.76754	1528.1	15	1560	22	1487	19	1487	19	4.90921	Core
Core-rim age pairs with a discordant analysis
Discordant Rims
16To_06_123.FIN2	229	7.36	1.41	0.12	0.1262	0.01	0.79453	904	48	764	57	1298	100	DISC	DISC	15.4867	Rim	16To_06_123.FIN2	144.4	2.16	5.58	0.25	0.3402	0.013	0.86827	1917	38	1885	63	1987	60	1987	60	5.13337	Core
16To_12_2.FIN2	58.6	1.05	0.074	0.019	0.0112	0.0014	0.57744	71	18	72	9.1	20	380	DISC	DISC	1.40845	Rim	16To_12_2.FIN2	144.2	0.419	0.231	0.013	0.03277	0.0012	0.37112	211	11	207.8	7.2	284	110	207.8	7.2	1.51659	Core
16TO16_45.FIN2	91.9	2.1	0.086	0.037	0.0131	0.0027	0.032593	83	34	84	17	100	780	DISC	DISC	1.20482	Rim	16TO16_45.FIN2	51.3	1.218	5.09	0.35	0.278	0.018	0.95666	1757	80	1559	97	2101	40	2101	40	25.7972	Core
16TO21_86.FIN2	202	1.182	0.141	0.03	0.0157	0.001	0.22933	133	26	100.3	6.6	650	430	DISC	DISC	24.5865	Rim	16TO21_86.FIN2	90.8	1.386	0.204	0.011	0.02848	0.00068	0.16558	187.6	9.6	181	4.2	250	110	181	4.2	3.51812	Core
16TO22_114.FIN2	175.5	0.833	0.091	0.01	0.01154	0.00048	0.19641	87.9	9.6	73.9	3.1	400	230	DISC	DISC	15.9272	Rim	16TO22_114.FIN2	205	8.4	1.804	0.076	0.1711	0.0046	0.75946	1041	28	1017	25	1102	60	1102	60	7.71325	Core
18TO02_67.FIN2	370	1.469	0.126	0.022	0.0146	0.00066	0.40836	120	20	93.4	4.2	620	380	DISC	DISC	22.1667	Rim	18TO02_67.FIN2	221	2.306	2.367	0.1	0.1699	0.0055	0.89262	1221	33	1010	31	1620	39	DISC	DISC	37.6543	Core
18TO03_118.FIN2	170	2.59	0.198	0.014	0.02283	0.00079	0.024696	183	12	145.5	5	680	160	DISC	DISC	20.4918	Rim	18TO03_118.FIN2	176.9	2.139	1.992	0.041	0.1865	0.0032	0.50668	1112	14	1102	17	1128	32	1128	32	2.30496	Core
18TO03_127.FIN2	542	2.67	0.323	0.027	0.0416	0.0044	0.64184	284	20	263	27	480	180	DISC	DISC	7.39437	Rim	18TO03_127.FIN2	166	1.646	1.73	0.046	0.1644	0.0035	0.74084	1017	17	980	20	1102	32	1102	32	11.0708	Core
Discordant Cores
16To_02_111.FIN2	428	4.77	0.308	0.013	0.0431	0.0015	0.36767	272.4	9.7	271.6	9.1	222	84	271.6	9.1	0.293686	Rim	16To_02_111.FIN2	74.1	1.314	2.02	0.2	0.157	0.013	0.97182	1108	70	935	73	1505	57	DISC	DISC	37.8738	Core
16To_04_57.FIN2	58.8	1.78	0.091	0.016	0.01397	0.00097	0.32518	88	15	89.4	6.2	110	340	89.4	6.2	1.59091	Rim	16To_04_57.FIN2	276	5.47	4.15	0.56	0.148	0.016	0.98856	1610	110	878	88	2839	96	DISC	DISC	69.0736	Core
16To_04_140.FIN2	299	1.866	0.083	0.0064	0.01195	0.0006	0.61494	80.8	6	76.6	3.8	199	140	76.6	3.8	5.19802	Rim	16To_04_140.FIN2	361	2.722	2.23	0.22	0.168	0.014	0.97064	1182	70	999	77	1522	100	DISC	DISC	34.3627	Core
16To_05_125.FIN2	151	3.02	0.116	0.015	0.0146	0.0013	0.17561	110	14	93.6	8.4	490	230	93.6	8.4	14.9091	Rim	16To_05_125.FIN2	107.5	1.078	1.939	0.14	0.1528	0.0092	0.82294	1099	46	919	52	1483	120	DISC	DISC	38.031	Core
16To_06_77.FIN2	288.9	2.439	0.0871	0.006	0.01384	0.00048	0.13177	84.6	5.6	88.6	3.1	10	130	88.6	3.1	4.72813	Rim	16To_06_77.FIN2	470	2.169	0.705	0.028	0.0547	0.0018	0.59949	541.5	17	343.2	11	1494	70	DISC	DISC	36.6205	Core
16To_12_105.FIN2	632	3.12	0.0801	0.005	0.01245	0.00067	0.54491	78.1	4.7	79.8	4.3	62	110	79.8	4.3	2.1767	Rim	16To_12_105.FIN2	693	3.39	1.01	0.059	0.0769	0.0043	0.94524	708	29	480	25	1480	65	DISC	DISC	32.2034	Core
16TO15_29.FIN2	337	2.33	0.286	0.014	0.03834	0.00098	0.24646	255	11	242.5	6.1	360	120	242.5	6.1	4.90196	Rim	16TO15_29.FIN2	191.9	3.34	2.1	0.11	0.1593	0.0077	0.90344	1140	38	951	43	1537	47	DISC	DISC	38.1262	Core
16TO16_115.FIN2	159	3.16	0.1	0.013	0.0154	0.0011	0.44157	96	12	98.3	6.7	70	220	98.3	6.7	2.39583	Rim	16TO16_115.FIN2	305	1.914	1.753	0.083	0.1455	0.0066	0.94944	1014	33	872	37	1367	35	DISC	DISC	36.2107	Core
16TO17_55.FIN2	238	1.28	0.237	0.016	0.0296	0.0015	0.071115	215	13	188.3	9.2	590	230	188.3	9.2	12.4186	Rim	16TO17_55.FIN2	344	2.428	2.91	0.079	0.1997	0.0046	0.79992	1379	21	1173	25	1725	34	DISC	DISC	32	Core
16TO20_41.FIN2	643	2.055	0.0759	0.0048	0.01142	0.00056	0.43632	74.3	4.5	73.2	3.6	110	130	73.2	3.6	1.48048	Rim	16TO20_41.FIN2	350	1.632	1.008	0.053	0.0958	0.0043	0.91804	697	28	588	25	1059	44	DISC	DISC	15.6385	Core
16TO21_131.FIN2	581	1.696	0.338	0.014	0.04444	0.00096	0.48896	295.1	10	280.3	5.9	391	74	280.3	5.9	5.01525	Rim	16TO21_131.FIN2	168.1	1.965	1.86	0.12	0.1438	0.0076	0.95124	1048	43	863	43	1469	44	DISC	DISC	41.2526	Core
18TO04_90.FIN2	290	3.13	0.3601	0.0094	0.04886	0.00079	0.17386	311.9	6.9	307.5	4.9	347	51	307.5	4.9	1.41071	Rim	18TO04_90.FIN2	591.5	1.88	1.254	0.03	0.0831	0.0017	0.51802	824.8	13	514.3	9.9	1791	32	DISC	DISC	37.6455	Core
18TO06_60.FIN2	620	3.106	0.086	0.0034	0.01303	0.00022	0.17168	83.7	3.1	83.47	1.4	107	72	83.47	1.4	0.274791	Rim	18TO06_60.FIN2	989	8.05	1.423	0.071	0.118	0.0052	0.97679	896	28	719	30	1376	27	DISC	DISC	19.7545	Core
18TO06_84.FIN2	228	1.243	0.0804	0.0045	0.01185	0.00025	0.039615	78.3	4.2	75.9	1.6	140	110	75.9	1.6	3.06513	Rim	18TO06_84.FIN2	191	1.223	0.587	0.036	0.0526	0.0023	0.8602	466	23	330	14	1180	70	DISC	DISC	29.1845	Core

## Sheet: 16TO01,03
Sample Name:				2σ Prop		2σ Prop		207/235	2σ Prop	206/238	2σ Prop	207/206	2σ Prop	Best age	2σ Prop
Grain #	[U] ppm	U/Th	207/235	error	206/238	error	RHO	Age Ma	error	Age (Ma)	error	Age (Ma)	error	(Ma)	error	% Discordance*	Rim/Core
16TO-01_1.FIN2	665	1.661	0.0916	0.0031	0.01364	0.00033	0.44818	88.9	2.9	87.3	2.1	124	60	87.3	2.1	1.79978
16TO-01_2.FIN2	1005	3.267	0.0672	0.0022	0.01046	0.00021	0.26325	66	2.1	67.05	1.3	41	58	67.05	1.3	1.59091
16TO-01_3.FIN2	233.6	2.269	0.0958	0.0046	0.01459	0.00046	0.19649	92.6	4.3	93.4	2.9	115	96	93.4	2.9	0.863931
16TO-01_4.FIN2	273	1.633	0.0685	0.0037	0.0107	0.00025	0.14165	67.5	3.6	68.6	1.6	14	94	68.6	1.6	1.62963
16TO-01_5.FIN2	540	1.377	0.0753	0.0037	0.01167	0.00033	0.12724	74	3.4	74.8	2.1	82	93	74.8	2.1	1.08108
16TO-01_6.FIN2	181.1	1.753	0.0682	0.0042	0.01038	0.00031	0.16203	67.5	4.1	66.6	2	130	110	66.6	2	1.33333
16TO-01_7.FIN2	792	1.029	0.0705	0.0022	0.01076	0.00025	0.20791	69.2	2.1	69	1.6	120	59	69	1.6	0.289017
16TO-01_8.FIN2	446	5.54	0.0692	0.0025	0.01039	0.00026	0.18076	68.1	2.4	66.6	1.7	126	71	66.6	1.7	2.20264
16TO-01_9.FIN2	282	1.908	0.0691	0.0034	0.01056	0.00029	0.10403	68.1	3.2	67.7	1.9	90	95	67.7	1.9	0.587372
16TO-01_10.FIN2	282	1.317	0.0763	0.0049	0.01104	0.00038	0.12911	74.5	4.6	70.8	2.4	180	130	70.8	2.4	4.96644
16TO-01_11.FIN2	89.1	1.117	0.0789	0.0066	0.01122	0.00041	0.043383	76.6	6.2	71.9	2.6	240	160	71.9	2.6	6.13577
16TO-01_12.FIN2	690	1.284	0.0843	0.0039	0.01269	0.00032	0.39692	82	3.6	81.3	2	87	70	81.3	2	0.853659
16TO-01_13.FIN2	196.1	1.148	0.0715	0.0065	0.01047	0.00038	0.024453	71	6.4	67.1	2.4	180	170	67.1	2.4	5.49296
16TO-01_14.FIN2	88.4	0.931	0.0682	0.0066	0.01103	0.00039	0.15209	66.5	6.2	70.7	2.5	-20	160	70.7	2.5	6.31579
16TO-01_15.FIN2	415	1.328	0.0687	0.0031	0.01055	0.0003	0.0075706	67.3	2.9	67.6	1.9	104	94	67.6	1.9	0.445765
16TO-01_16.FIN2	440	0.859	0.07	0.0031	0.01061	0.00025	0.041879	68.6	2.9	68	1.6	107	84	68	1.6	0.874636
16TO-01_17.FIN2	356	1.56	0.1085	0.004	0.01612	0.00041	0.15667	104.7	3.7	103.1	2.6	143	71	103.1	2.6	1.52818
16TO-01_18.FIN2	286	1.74	0.0887	0.0051	0.01392	0.00041	0.089689	87.5	4.6	89.1	2.6	100	100	89.1	2.6	1.82857
16TO-01_19.FIN2	203	0.95	0.573	0.016	0.0744	0.0018	0.20816	461.1	10	463.3	11	456	62	463.3	11	0.47712
16TO-01_20.FIN2	176.9	2.631	0.0839	0.0048	0.01222	0.00036	0.070121	81.5	4.5	78.3	2.3	200	110	78.3	2.3	3.92638
16TO-01_21.FIN2	284	1.491	0.0954	0.0046	0.01411	0.00035	0.27692	93.1	4.3	90.3	2.2	157	87	90.3	2.2	3.00752
16TO-01_22.FIN2	1390	7.97	0.4516	0.011	0.06058	0.0014	0.39848	378.8	7.8	379.1	8.3	406	46	379.1	8.3	0.0791975
16TO-01_23.FIN2	221.5	1.681	0.0678	0.0036	0.01039	0.00026	0.043635	66.5	3.4	66.7	1.6	94	96	66.7	1.6	0.300752
16TO-01_24.FIN2	70	0.683	4.31	0.13	0.3004	0.008	0.48581	1692	25	1693	40	1673	47	1673	47	1.19546
16TO-01_25.FIN2	431	0.868	0.0757	0.0041	0.01139	0.00042	0.02827	74.1	3.9	73	2.7	170	120	73	2.7	1.48448
16TO-01_26.FIN2	445	2.02	0.0865	0.0034	0.01329	0.00037	0.19386	84.1	3.2	85.1	2.3	67	82	85.1	2.3	1.18906
16TO-01_27.FIN2	179.4	1.14	0.0744	0.005	0.01087	0.00031	0.086875	72.6	4.7	69.7	2	160	130	69.7	2	3.99449
16TO-01_28.FIN2	203.5	1.518	0.101	0.0052	0.01477	0.00044	0.16052	97.4	4.8	94.5	2.8	185	99	94.5	2.8	2.97741
16TO-01_29.FIN2	593	1.455	0.0845	0.0033	0.01268	0.0003	0.1049	82.3	3.1	81.2	1.9	136	78	81.2	1.9	1.33657
16TO-01_30.FIN2	815	1.94	0.0863	0.0032	0.01332	0.00035	0.43565	84	3	85.3	2.3	69	63	85.3	2.3	1.54762
16TO-01_31.FIN2	579	2.76	0.0714	0.0026	0.0109	0.00027	0.1909	70.2	2.4	69.9	1.7	113	70	69.9	1.7	0.42735
16TO-01_32.FIN2	348	1.576	0.0929	0.0046	0.01389	0.0004	0.21676	90	4.3	88.9	2.5	174	93	88.9	2.5	1.22222
16TO-01_33.FIN2	73.3	1.504	0.114	0.01	0.01509	0.00071	0.056632	109	9.5	96.6	4.5	350	190	96.6	4.5	11.3761
16TO-01_34.FIN2	96.1	0.653	0.0891	0.0087	0.012	0.00035	0.050134	85.7	8	76.9	2.2	280	180	76.9	2.2	10.2684
16TO-01_35.FIN2	474	0.873	0.1788	0.0055	0.0265	0.00068	0.26153	167.6	4.9	168.6	4.3	191	64	168.6	4.3	0.596659
16TO-01_36.FIN2	695	1.143	0.0722	0.0029	0.01086	0.00028	0.12522	70.7	2.7	69.6	1.8	135	80	69.6	1.8	1.55587
16TO-01_37.FIN2	456	5.25	0.0743	0.0036	0.01097	0.0003	0.19412	72.7	3.4	70.4	1.9	190	92	70.4	1.9	3.16369
16TO-01_38.FIN2	293.6	2.974	3.538	0.11	0.271	0.0089	0.52818	1534	24	1545	45	1536	61	1536	61	0.585938
16TO-01_39.FIN2	168	1.741	0.098	0.0084	0.01481	0.00044	0.24416	95.3	7.5	94.7	2.8	140	150	94.7	2.8	0.629591
16TO-01_40.FIN2	66.8	0.844	0.0789	0.0087	0.01195	0.00056	0.15331	76.9	8.1	76.6	3.6	140	200	76.6	3.6	0.390117
16TO-01_41.FIN2	469	1.571	0.0719	0.0031	0.011	0.00027	0.084949	70.4	3	70.5	1.7	144	86	70.5	1.7	0.142045
16TO-01_42.FIN2	872	0.84	0.054	0.0025	0.00902	0.00023	0.24911	53.3	2.4	57.9	1.4	144	87	57.9	1.4	8.63039
16TO-01_43.FIN2	146.3	1.225	0.126	0.0087	0.01831	0.001	0.30713	119.6	7.8	116.9	6.4	180	130	116.9	6.4	2.25753
16TO-01_44.FIN2	859	3.25	0.283	0.0092	0.04048	0.0012	0.45544	252.9	7.3	255.8	7.4	245	64	255.8	7.4	1.1467
16TO-01_45.FIN2	74.1	2.016	0.0732	0.0073	0.01119	0.00044	0.0052762	72.2	6.7	71.7	2.8	190	180	71.7	2.8	0.692521
16TO-01_46.FIN2	282	1.316	0.067	0.0039	0.01069	0.00044	0.21574	65.6	3.7	68.8	2.9	80	110	68.8	2.9	4.87805
16TO-01_47.FIN2	392.5	0.903	0.0769	0.0037	0.01181	0.00035	0.27803	75	3.5	75.7	2.2	116	89	75.7	2.2	0.933333
16TO-01_48.FIN2	212	2.415	0.1275	0.006	0.01963	0.00058	0.11552	122.5	5.3	125.3	3.7	75	93	125.3	3.7	2.28571
16TO-01_49.FIN2	217.6	1.334	0.0705	0.004	0.01052	0.00029	0.12594	69.3	3.7	67.5	1.9	130	110	67.5	1.9	2.5974
16TO-01_50.FIN2	90.1	0.611	0.0703	0.0074	0.01019	0.00042	0.23989	69.2	6.8	65.3	2.7	130	170	65.3	2.7	5.63584
16TO-01_51.FIN2	265	2.144	0.0708	0.0044	0.0105	0.0005	0.41586	69.2	4.1	67.3	3.2	150	110	67.3	3.2	2.74566
16TO-01_52.FIN2	259	1.702	0.0732	0.004	0.01137	0.00037	0.14196	71.5	3.8	72.9	2.3	110	110	72.9	2.3	1.95804
16TO-01_53.FIN2	213	2.7	0.0858	0.0091	0.01091	0.00087	0.56875	83.2	8.5	69.9	5.5	420	180	DISC	DISC	15.9856
16TO-01_54.FIN2	275.3	1.779	0.0928	0.004	0.01449	0.00038	0.07538	89.9	3.7	92.7	2.4	31	88	92.7	2.4	3.11457
16TO-01_55.FIN2	527	1.925	0.106	0.0038	0.01617	0.00043	0.18881	102.1	3.5	103.4	2.7	95	72	103.4	2.7	1.27326
16TO-01_56.FIN2	613	3.98	3.62	0.13	0.268	0.0094	0.54792	1557	28	1535	46	1578	58	1578	58	2.72497
16TO-01_57.FIN2	710	15.8	2.021	0.055	0.1908	0.0051	0.68688	1122	18	1125	28	1368	37	1368	37	17.7632
16TO-01_58.FIN2	434	1.878	0.0855	0.0037	0.01168	0.00026	0.1135	83.2	3.5	74.8	1.7	293	93	74.8	1.7	10.0962
16TO-01_59.FIN2	121.5	1.459	0.0754	0.0069	0.01152	0.0005	0.049746	73.4	6.5	73.8	3.2	60	160	73.8	3.2	0.544959
16TO-01_60.FIN2	297	0.991	0.0984	0.0049	0.01507	0.0004	0.17404	95	4.5	96.4	2.5	57	93	96.4	2.5	1.47368
16TO-01_61.FIN2	148	0.707	0.0729	0.0055	0.01128	0.00045	0.23177	71.5	5.2	72.3	2.9	130	130	72.3	2.9	1.11888
16TO-01_62.FIN2	595	0.771	0.0929	0.0065	0.01334	0.00065	0.29031	90.1	6	85.4	4.1	250	170	85.4	4.1	5.21643
16TO-01_63.FIN2	552	2.338	0.0796	0.0035	0.012	0.00038	0.20715	77.6	3.3	76.9	2.4	115	90	76.9	2.4	0.902062
16TO-01_64.FIN2	44.9	4.15	3.42	0.16	0.2623	0.0092	0.5867	1503	36	1505	46	1524	64	1524	64	1.24672
16TO-01_65.FIN2	75.2	2.202	0.0645	0.0075	0.01062	0.00041	0.27628	62.7	7.1	68.1	2.6	10	180	68.1	2.6	8.61244
16TO-01_66.FIN2	90	0.728	4.24	0.13	0.3088	0.0084	0.66806	1685	24	1733	41	1638	43	1638	43	5.79976
16TO-01_67.FIN2	940	1.65	0.084	0.0031	0.01245	0.00032	0.33136	81.8	2.9	79.8	2	131	69	79.8	2	2.44499
16TO-01_68.FIN2	258	1.841	0.0698	0.0038	0.01077	0.00033	0.11447	68.3	3.6	69	2.1	22	95	69	2.1	1.02489
16TO-01_69.FIN2	1480	1.97	0.1818	0.0054	0.02643	0.00061	0.46771	169.4	4.6	168.2	3.8	174	54	168.2	3.8	0.708383
16TO-01_70.FIN2	161	0.919	0.0785	0.0077	0.01182	0.00044	0.022431	76.2	7.2	75.7	2.8	100	180	75.7	2.8	0.656168
16TO-01_71.FIN2	335	2	0.0774	0.0041	0.01234	0.00034	0.20854	75.5	3.9	79	2.2	31	92	79	2.2	4.63576
16TO-01_72.FIN2	185	1.808	0.0725	0.0048	0.01119	0.00032	0.063424	70.8	4.5	71.7	2	90	120	71.7	2	1.27119
16TO-01_73.FIN2	538	1.223	0.1981	0.0065	0.02813	0.00065	0.24405	183.2	5.5	178.8	4	246	66	178.8	4	2.40175
16TO-01_74.FIN2	93.3	1.306	0.081	0.0087	0.01128	0.0005	0.19002	78.5	8.2	72.3	3.2	250	200	72.3	3.2	7.89809
16TO-01_75.FIN2	264.1	2.9	0.0682	0.0037	0.0107	0.00029	0.20253	66.8	3.5	68.6	1.9	44	93	68.6	1.9	2.69461
16TO-01_76.FIN2	358	4.3	0.0707	0.0036	0.01097	0.0003	0.064633	69.2	3.4	70.3	1.9	65	99	70.3	1.9	1.5896
16TO-01_77.FIN2	289	1.992	0.0685	0.0037	0.01073	0.00035	0.12765	67.2	3.5	68.8	2.3	30	110	68.8	2.3	2.38095
16TO-01_78.FIN2	286.2	1.255	0.1762	0.0065	0.02499	0.00055	0.18648	164.4	5.6	159.1	3.4	227	70	159.1	3.4	3.22384
16TO-01_79.FIN2	340	1.757	0.1666	0.0058	0.0244	0.0006	0.15476	157	5.1	155.4	3.8	180	70	155.4	3.8	1.01911
16TO-01_80.FIN2	116	1.587	0.0736	0.0067	0.01108	0.0004	0.0088916	72.5	6.2	71	2.6	100	160	71	2.6	2.06897
16TO-01_81.FIN2	391	1.35	0.0842	0.0036	0.0132	0.00036	0.20357	81.9	3.4	84.5	2.3	12	78	84.5	2.3	3.1746
16TO-01_82.FIN2	387	1.088	0.0696	0.0034	0.01095	0.00032	0.086251	68.2	3.2	70.2	2	66	94	70.2	2	2.93255
16TO-01_83.FIN2	309	2.19	0.0811	0.0046	0.01217	0.00038	0.089105	79	4.3	78	2.4	130	110	78	2.4	1.26582
16TO-01_84.FIN2	287.8	4.32	0.074	0.004	0.0109	0.0003	0.21918	72.3	3.7	69.9	1.9	140	96	69.9	1.9	3.3195
16TO-01_85.FIN2	277	1.388	0.0776	0.0041	0.01195	0.00036	0.12123	76	3.9	76.6	2.3	66	100	76.6	2.3	0.789474
16TO-01_86.FIN2	272	0.905	0.56	0.016	0.0726	0.0016	0.24375	451.3	11	451.9	9.6	426	58	451.9	9.6	0.132949
16TO-01_87.FIN2	254	2.745	0.0732	0.0044	0.01102	0.00032	0.26945	71.4	4.2	70.7	2.1	65	100	70.7	2.1	0.980392
16TO-01_89.FIN2	384.4	1.846	0.1053	0.0047	0.01625	0.00043	0.33213	101.4	4.3	103.9	2.7	70	81	103.9	2.7	2.46548
16TO-01_90.FIN2	296	2.393	0.2978	0.0084	0.04145	0.00088	0.20659	265.9	6.2	261.8	5.4	274	56	261.8	5.4	1.54193
16TO-01_91.FIN2	54.3	0.982	6.66	0.25	0.3546	0.0099	0.39048	2063	34	1955	47	2135	62	2135	62	8.43091
16TO-01_92.FIN2	257	1.928	0.0683	0.0038	0.01044	0.00031	0.015928	66.9	3.6	66.9	2	90	110	66.9	2	0
16TO-01_93.FIN2	221	0.984	0.0742	0.0047	0.01079	0.00036	0.09282	72.5	4.5	69.2	2.3	250	130	69.2	2.3	4.55172
16TO-01_94.FIN2	393	2.55	0.1051	0.0044	0.01538	0.0004	0.1238	101.6	4	98.4	2.6	168	85	98.4	2.6	3.14961
16TO-01_96.FIN2	886	1.133	0.0697	0.0025	0.01075	0.00035	0.38125	68.3	2.4	68.9	2.3	47	69	68.9	2.3	0.878477
16TO-01_97.FIN2	129.3	2.015	0.0735	0.0051	0.01089	0.00031	0.029683	71.7	4.8	69.8	2	190	140	69.8	2	2.64993
16TO-01_98.FIN2	166.4	0.439	0.0706	0.0049	0.01101	0.00031	0.038609	69.4	4.7	70.6	2	30	120	70.6	2	1.72911
16TO-01_99.FIN2	151.3	1.165	2.175	0.065	0.1999	0.0058	0.60002	1175	21	1176	32	1152	48	1152	48	2.08333
16TO-01_100.FIN2	368	2.225	0.0998	0.0067	0.01488	0.00056	0.12094	97.4	6.4	95.2	3.5	140	150	95.2	3.5	2.25873
16TO-01_101.FIN2	219.1	1.228	0.1218	0.0087	0.0179	0.0007	0.17441	116.3	7.9	114.4	4.4	170	150	114.4	4.4	1.63371
16TO-01_102.FIN2	282	1.954	0.1565	0.006	0.02322	0.00056	0.039945	147.8	5.3	148	3.5	140	81	148	3.5	0.135318
16TO-01_103.FIN2	257.6	1.308	0.0786	0.0053	0.01187	0.00036	0.16064	77.1	4.9	76.1	2.3	100	120	76.1	2.3	1.29702
16TO-01_104.FIN2	283	1.135	0.0835	0.0042	0.01193	0.00034	0.07253	81.2	4	76.4	2.2	210	110	76.4	2.2	5.91133
16TO-01_105.FIN2	707	4.23	0.0712	0.0028	0.01107	0.00026	0.22563	70.3	2.6	71	1.7	48	70	71	1.7	0.995733
16TO-01_106.FIN2	421	1.637	0.0845	0.0044	0.01236	0.00035	0.28814	82.7	4.2	79.2	2.2	173	100	79.2	2.2	4.23216
16TO-01_107.FIN2	118.4	0.788	2.255	0.059	0.2039	0.0051	0.41324	1202	19	1195	27	1201	44	1201	44	0.499584
16TO-01_108.FIN2	342	1.482	0.081	0.0041	0.01149	0.00037	0.28711	78.9	3.8	73.6	2.3	257	93	73.6	2.3	6.71736
16TO-01_109.FIN2	83.6	0.818	0.0878	0.0074	0.01199	0.00047	0.0017675	85.5	6.9	76.8	3	290	160	76.8	3	10.1754
16TO-01_110.FIN2	385	1.201	0.0767	0.0038	0.01183	0.00036	0.32944	75.2	3.5	75.8	2.3	28	88	75.8	2.3	0.797872
16TO-01_112.FIN2	799	1.635	0.182	0.0054	0.02646	0.00064	0.35442	171.1	4.6	168.4	4	182	57	168.4	4	1.57802
16TO-01_113.FIN2	270	2.295	4.191	0.099	0.294	0.0066	0.59003	1673	19	1660	33	1664	33	1664	33	0.240385
16TO-01_114.FIN2	546	1.959	0.0717	0.0039	0.01061	0.00027	0.043822	70.2	3.7	68	1.7	160	110	68	1.7	3.1339
16TO-01_115.FIN2	264.4	2.417	0.0967	0.0052	0.0144	0.00041	0.18797	93.8	4.9	92.2	2.6	147	98	92.2	2.6	1.70576
16TO-01_116.FIN2	73.9	0.904	0.0674	0.0074	0.01034	0.00037	0.079164	65.5	7	66.3	2.4	50	190	66.3	2.4	1.22137
16TO-01_117.FIN2	515	4.38	0.0703	0.0033	0.01087	0.00038	0.22619	68.9	3.1	69.7	2.4	58	93	69.7	2.4	1.1611
16TO-01_118.FIN2	54.5	0.457	0.158	0.014	0.02435	0.00079	0.087152	148	12	155.1	5	110	160	155.1	5	4.7973
16TO-01_120.FIN2	65.2	1.046	1.81	0.053	0.1744	0.0047	0.39037	1049	20	1035	26	1080	56	1080	56	4.16667
16TO-01_121.FIN2	112.6	1.474	0.175	0.015	0.0255	0.0012	0.21234	163	13	162.4	7.6	50	160	162.4	7.6	0.368098
16TO-01_122.FIN2	224.7	1.626	0.0744	0.0053	0.01113	0.00032	0.29065	72.6	5	71.3	2.1	60	120	71.3	2.1	1.79063
16TO-01_123.FIN2	79	0.555	0.179	0.013	0.02623	0.00092	0.18763	168	11	166.9	5.8	150	140	166.9	5.8	0.654762
16TO-01_124.FIN2	332.7	1.719	0.3141	0.0092	0.04031	0.00083	0.37828	277.5	7	254.7	5.2	434	56	254.7	5.2	8.21622
16TO-01_125.FIN2	723	7.07	0.639	0.017	0.0804	0.002	0.33538	500.9	11	498.3	12	506	56	498.3	12	0.519066
16TO-01_126.FIN2	270.3	1.072	0.0726	0.0041	0.01072	0.0003	0.10773	71.4	3.8	68.7	1.9	120	110	68.7	1.9	3.78151
16TO-03_1.FIN2	590	1.26	0.0747	0.0029	0.01161	0.00027	0.23259	73	2.7	74.4	1.7	61	71	74.4	1.7	1.91781
16TO-03_2.FIN2	102	1.043	0.0895	0.0071	0.01415	0.00045	0.0268	86.4	6.6	90.5	2.9	70	150	90.5	2.9	4.74537
16TO-03_3.FIN2	42.3	3.46	1.761	0.058	0.1728	0.0045	0.34517	1032	22	1027	25	1017	68	1017	68	0.983284
16TO-03_4.FIN2	282	1.945	0.0838	0.0049	0.01129	0.00037	0.096807	81.4	4.6	72.4	2.4	310	120	72.4	2.4	11.0565
16TO-03_5.FIN2	385	2.29	2.965	0.069	0.2393	0.0055	0.58557	1399	17	1384	28	1397	34	1397	34	0.930565
16TO-03_6.FIN2	155	0.412	0.078	0.01	0.01174	0.00061	0.18509	75.8	9.7	75.2	3.9	140	230	75.2	3.9	0.791557
16TO-03_7.FIN2	714	1.613	0.2803	0.0076	0.03936	0.00089	0.36378	251.4	5.8	248.8	5.5	255	51	248.8	5.5	1.03421
16TO-03_8.FIN2	814	1.731	0.117	0.0034	0.01774	0.00042	0.40283	112.3	3.1	113.3	2.6	85	53	113.3	2.6	0.890472
16TO-03_9.FIN2	660	2.35	0.433	0.017	0.0615	0.0021	0.3954	365	12	384	13	281	84	384	13	5.20548
16TO-03_10.FIN2	321	1.521	0.512	0.015	0.0672	0.0018	0.43925	421.3	10	419.4	11	412	58	419.4	11	0.450985
16TO-03_11.FIN2	160	1.5	0.455	0.015	0.0612	0.0016	0.12638	379.8	11	382.9	9.6	344	73	382.9	9.6	0.816219
16TO-03_12.FIN2	223.3	1.2	0.0692	0.0059	0.01118	0.00043	0.13032	67.7	5.6	71.7	2.7	0	160	71.7	2.7	5.90842
16TO-03_13.FIN2	166	1.63	4.474	0.11	0.3085	0.0077	0.66838	1726	20	1731	38	1713	34	1713	34	1.05079
16TO-03_14.FIN2	405.1	1.95	0.0877	0.0035	0.01372	0.00032	0.19667	85.3	3.2	87.9	2	47	73	87.9	2	3.04807
16TO-03_15.FIN2	164.7	2.826	0.0815	0.0052	0.01226	0.00038	0.038684	79.7	5	78.5	2.4	80	120	78.5	2.4	1.50565
16TO-03_16.FIN2	219.2	0.893	0.1745	0.0071	0.0261	0.00063	0.015651	162.8	6.1	166.1	4	125	82	166.1	4	2.02703
16TO-03_17.FIN2	69.2	1.088	1.649	0.056	0.1656	0.0046	0.29766	986	21	987	26	962	71	962	71	2.59875
16TO-03_18.FIN2	231.5	1.059	0.223	0.011	0.02869	0.00082	0.36105	204.7	8.9	182.3	5.2	450	94	182.3	5.2	10.9428
16TO-03_19.FIN2	178.6	0.868	0.0748	0.0047	0.01131	0.00035	0.16646	73.4	4.5	72.5	2.2	140	120	72.5	2.2	1.22616
16TO-03_20.FIN2	226.9	2.032	0.0869	0.0041	0.01293	0.00036	0.2025	84.4	3.8	82.8	2.3	91	87	82.8	2.3	1.89573
16TO-03_21.FIN2	150	1.26	0.102	0.0067	0.01583	0.00048	0.033391	98.1	6.2	101.2	3.1	60	120	101.2	3.1	3.16004
16TO-03_22.FIN2	244.8	2.23	0.1967	0.0073	0.02831	0.00074	0.25001	182.4	6.1	179.9	4.6	227	72	179.9	4.6	1.37061
16TO-03_23.FIN2	881	1.024	0.193	0.0059	0.02819	0.00067	0.34238	179.7	4.9	179.2	4.2	201	56	179.2	4.2	0.278242
16TO-03_24.FIN2	299.5	1.178	0.0723	0.0051	0.01081	0.00037	0.28747	70.8	4.8	69.3	2.3	130	130	69.3	2.3	2.11864
16TO-03_25.FIN2	348.7	1.599	0.2897	0.011	0.04045	0.0011	0.46739	257.7	8.6	255.6	6.9	224	71	255.6	6.9	0.814901
16TO-03_26.FIN2	492	1.302	0.1585	0.006	0.02356	0.00068	0.32947	149.1	5.3	150.1	4.3	182	74	150.1	4.3	0.670691
16TO-03_27.FIN2	368	1.352	0.1779	0.0062	0.02559	0.00064	0.15602	165.9	5.4	162.9	4	200	68	162.9	4	1.80832
16TO-03_28.FIN2	215	0.98	0.551	0.016	0.07157	0.0016	0.17596	446.1	10	446.1	9.2	451	55	446.1	9.2	0
16TO-03_29.FIN2	116.2	2.092	2.972	0.079	0.2392	0.0056	0.56925	1400	21	1382	29	1421	39	1421	39	2.74455
16TO-03_30.FIN2	179	1.301	0.092	0.0058	0.01417	0.0005	0.22346	89.5	5.3	90.7	3.2	70	110	90.7	3.2	1.34078
16TO-03_31.FIN2	425	2.91	0.0875	0.0046	0.0129	0.00036	0.11714	85.4	4.2	82.6	2.3	154	97	82.6	2.3	3.27869
16TO-03_32.FIN2	45.1	1.026	0.072	0.011	0.01114	0.00053	0.0080204	69	10	71.8	3.4	50	240	71.8	3.4	4.05797
16TO-03_33.FIN2	221	2.197	0.0624	0.0049	0.00942	0.00027	0.29907	61.1	4.6	60.4	1.7	60	130	60.4	1.7	1.14566
16TO-03_34.FIN2	337	1.298	0.1025	0.0068	0.01485	0.00069	0.40615	98.8	6.2	95	4.4	200	120	95	4.4	3.84615
16TO-03_35.FIN2	521	3.41	3.371	0.077	0.2701	0.0063	0.67297	1498	18	1540	32	1638	32	1638	32	5.98291
16TO-03_36.FIN2	303	1.275	0.0946	0.0042	0.01433	0.00037	0.11817	91.7	3.9	91.7	2.3	107	94	91.7	2.3	0
16TO-03_37.FIN2	290.8	1.999	0.0734	0.0033	0.0114	0.00029	0.04361	71.8	3.1	73.1	1.8	77	88	73.1	1.8	1.81058
16TO-03_38.FIN2	83.2	0.4404	3.327	0.092	0.2604	0.0064	0.40938	1487	22	1491	33	1483	47	1483	47	0.539447
16TO-03_39.FIN2	315	1.072	0.0973	0.0064	0.01447	0.00054	0.26024	94.1	5.9	92.6	3.4	180	130	92.6	3.4	1.59405
16TO-03_40.FIN2	250	3.045	0.0757	0.0049	0.01148	0.00037	0.093109	74.6	4.7	73.6	2.4	110	120	73.6	2.4	1.34048
16TO-03_41.FIN2	121.2	1.627	0.257	0.015	0.0346	0.0013	0.30273	233	12	219.5	7.9	360	110	219.5	7.9	5.79399
16TO-03_42.FIN2	119	0.991	4.228	0.094	0.3014	0.0064	0.52638	1678	18	1697	32	1670	31	1670	31	1.61677
16TO-03_43.FIN2	107.5	1.44	3.972	0.11	0.2928	0.0079	0.65178	1630	23	1654	39	1621	38	1621	38	2.03578
16TO-03_44.FIN2	614	3.09	0.0802	0.0029	0.01225	0.0003	0.19014	78.5	2.7	78.5	1.9	55	66	78.5	1.9	0
16TO-03_45.FIN2	151.8	1.193	0.0741	0.0053	0.0111	0.00037	0.060667	72.6	4.9	71.2	2.3	160	140	71.2	2.3	1.92837
16TO-03_46.FIN2	113.5	1.24	0.566	0.034	0.0725	0.0028	0.49248	456	22	451	17	430	110	451	17	1.09649
16TO-03_47.FIN2	681	1.687	0.1162	0.0039	0.01629	0.00037	0.25674	111.5	3.5	104.3	2.4	257	64	104.3	2.4	6.4574
16TO-03_48.FIN2	388	3.75	0.0822	0.0051	0.01297	0.00052	0.22381	80	4.8	83.1	3.3	0	120	83.1	3.3	3.875
16TO-03_49.FIN2	671	2.83	0.0649	0.0025	0.00972	0.00024	0.35364	63.8	2.4	62.4	1.5	98	72	62.4	1.5	2.19436
16TO-03_50.FIN2	195.5	0.605	2.298	0.066	0.2063	0.0054	0.60447	1211	20	1210	29	1222	43	1222	43	0.981997
16TO-03_51.FIN2	1630	2.62	0.0798	0.0035	0.01222	0.00036	0.25584	77.9	3.3	78.3	2.3	108	82	78.3	2.3	0.513479
16TO-03_52.FIN2	268.7	1.032	0.0764	0.0043	0.01163	0.00028	0.10552	75.3	4	74.7	1.8	130	110	74.7	1.8	0.796813
16TO-03_53.FIN2	835	0.5619	0.1827	0.0058	0.02612	0.00066	0.37745	170.2	5	166.2	4.1	179	59	166.2	4.1	2.35018
16TO-03_54.FIN2	101.4	1.13	2.871	0.071	0.239	0.0052	0.42169	1377	19	1381	27	1354	40	1354	40	1.99409
16TO-03_55.FIN2	272	0.986	0.0967	0.0043	0.01425	0.00036	0.15119	93.5	4	91.2	2.3	144	86	91.2	2.3	2.45989
16TO-03_56.FIN2	787	1.725	0.0787	0.003	0.01178	0.00029	0.26137	76.9	2.8	75.5	1.9	138	74	75.5	1.9	1.82055
16TO-03_57.FIN2	419	2.34	0.4461	0.012	0.06028	0.0014	0.31764	374.8	8.8	377.3	8.4	361	56	377.3	8.4	0.667022
16TO-03_59.FIN2	216.3	2.377	0.0985	0.0054	0.01448	0.00042	0.065931	95.1	5	92.7	2.6	160	100	92.7	2.6	2.52366
16TO-03_60.FIN2	205	2.773	0.1007	0.0057	0.01211	0.00036	0.25441	97.1	5.3	77.6	2.3	600	110	DISC	DISC	20.0824
16TO-03_61.FIN2	419	1.69	0.187	0.007	0.02735	0.00093	0.41563	174.3	5.8	173.9	5.8	223	76	173.9	5.8	0.229489
16TO-03_62.FIN2	33	0.994	0.077	0.013	0.0109	0.00063	0.026202	73	12	69.9	4	-10	260	69.9	4	4.24658
16TO-03_63.FIN2	460	1.732	0.2893	0.0085	0.04165	0.00097	0.23301	258.6	6.7	263	6	204	59	263	6	1.70147
16TO-03_64.FIN2	166.1	1.819	0.097	0.006	0.01517	0.00041	0.042586	93.5	5.5	97.1	2.6	50	110	97.1	2.6	3.85027
16TO-03_65.FIN2	627	1.743	0.0782	0.0032	0.01179	0.00034	0.35672	76.3	3	75.6	2.1	145	73	75.6	2.1	0.917431
16TO-03_66.FIN2	779	1.953	0.1104	0.005	0.01619	0.00056	0.32281	106.2	4.5	103.5	3.6	222	92	103.5	3.6	2.54237
16TO-03_67.FIN2	41	1.86	2.348	0.085	0.2094	0.0064	0.41536	1221	26	1224	34	1223	66	1223	66	0.0817661
16TO-03_68.FIN2	358	1.413	0.0944	0.0047	0.01497	0.00047	0.30662	91.8	4.3	95.8	3	36	87	95.8	3	4.3573
16TO-03_69.FIN2	573	0.839	0.1806	0.0053	0.0269	0.00059	0.081927	168.4	4.6	171.1	3.7	135	59	171.1	3.7	1.60333
16TO-03_70.FIN2	87.5	3.96	0.112	0.014	0.01616	0.00089	0.32869	107	13	103.3	5.6	200	230	103.3	5.6	3.45794	Rim
16TO-03_70.FIN2	141.8	2.164	0.174	0.013	0.02623	0.00083	0.33784	162	11	166.9	5.2	160	140	166.9	5.2	3.02469	Core
16TO-03_71.FIN2	76.9	1.037	1.779	0.062	0.1742	0.0057	0.50915	1035	23	1034	31	1047	64	1047	64	1.24164
16TO-03_72.FIN2	135.9	2.831	0.1262	0.0077	0.01911	0.00057	0.21212	120.7	6.8	122	3.6	70	100	122	3.6	1.07705
16TO-03_73.FIN2	102.8	2.052	0.0747	0.0069	0.01164	0.0004	0.0085488	73.3	6.7	74.6	2.6	110	160	74.6	2.6	1.77353
16TO-03_74.FIN2	117.3	1.608	0.0795	0.0064	0.01187	0.00054	0.30005	77.1	6	76	3.4	100	140	76	3.4	1.42672
16TO-03_75.FIN2	140.2	1.784	0.158	0.0086	0.0235	0.00067	0.066253	148.2	7.5	149.7	4.2	130	110	149.7	4.2	1.01215
16TO-03_76.FIN2	259	1.308	0.0876	0.0046	0.01382	0.00034	0.080572	85.9	4.4	88.5	2.2	32	100	88.5	2.2	3.02678
16TO-03_77.FIN2	281	1.495	0.0902	0.006	0.01302	0.00035	0.18514	87.2	5.5	83.4	2.2	190	120	83.4	2.2	4.3578
16TO-03_78.FIN2	167	1.841	0.0793	0.0053	0.01206	0.00043	0.08913	77.7	5.1	77.3	2.7	150	130	77.3	2.7	0.514801
16TO-03_79.FIN2	131.8	0.39	0.164	0.011	0.02395	0.00069	0.18688	156.4	9.3	152.5	4.3	260	110	152.5	4.3	2.49361
16TO-03_80.FIN2	115.9	2.27	0.0914	0.008	0.01315	0.00052	0.42426	88	7.4	84.2	3.3	140	150	84.2	3.3	4.31818
16TO-03_81.FIN2	303	1.72	0.431	0.015	0.0628	0.0022	0.40319	362.4	11	394	13	406	76	394	13	8.71965
16TO-03_82.FIN2	523	1.165	0.0696	0.004	0.01021	0.00045	0.28886	68.1	3.8	65.5	2.9	170	110	65.5	2.9	3.81791
16TO-03_83.FIN2	140	1.63	0.1587	0.0086	0.0233	0.00075	0.11964	149.5	7.6	148.5	4.7	180	110	148.5	4.7	0.668896
16TO-03_84.FIN2	418	1.515	0.0829	0.0064	0.01207	0.00046	0.33394	80.7	6	77.3	2.9	250	150	77.3	2.9	4.21314
16TO-03_85.FIN2	690	4.31	0.1011	0.0048	0.0152	0.00061	0.41716	97.5	4.4	97.2	3.9	151	90	97.2	3.9	0.307692
16TO-03_86.FIN2	223	1.885	0.253	0.011	0.0349	0.0015	0.18143	229.4	8.6	221	9.1	400	120	221	9.1	3.66173
16TO-03_87.FIN2	441	1.94	0.0705	0.0036	0.01115	0.00032	0.11749	69	3.4	71.5	2	32	95	71.5	2	3.62319
16TO-03_88.FIN2	356	2.11	0.1206	0.0076	0.01528	0.00057	0.31621	115.3	6.9	97.7	3.6	450	120	DISC	DISC	15.2645
16TO-03_89.FIN2	775	2.767	0.3116	0.009	0.04407	0.0011	0.258	275.2	6.9	278	6.7	242	65	278	6.7	1.01744
16TO-03_90.FIN2	192.8	1.223	0.2673	0.0097	0.03864	0.0011	0.20148	240.1	7.7	244.4	6.6	209	81	244.4	6.6	1.79092
16TO-03_91.FIN2	428	1.659	3.234	0.094	0.259	0.0073	0.58889	1465	23	1484	37	1438	48	1438	48	3.19889
16TO-03_92.FIN2	286	1.697	0.0661	0.005	0.00973	0.00041	0.11284	64.8	4.7	62.4	2.6	140	150	62.4	2.6	3.7037
16TO-03_93.FIN2	339	1.74	0.0785	0.0041	0.01212	0.00034	0.050963	76.9	3.8	77.6	2.2	67	100	77.6	2.2	0.910273
16TO-03_94.FIN2	110.3	0.551	0.171	0.014	0.02497	0.00085	0.20108	160	12	158.9	5.4	210	150	158.9	5.4	0.6875
16TO-03_95.FIN2	67.9	1.252	0.0813	0.008	0.01213	0.00046	0.056717	79.4	7.6	77.7	2.9	160	170	77.7	2.9	2.14106
16TO-03_96.FIN2	78.5	1.55	0.0996	0.0082	0.01445	0.00057	0.2097	95.5	7.5	92.4	3.6	160	150	92.4	3.6	3.24607
16TO-03_97.FIN2	947	1.425	0.0788	0.0027	0.01195	0.00032	0.29358	77	2.5	76.6	2.1	140	67	76.6	2.1	0.519481
16TO-03_98.FIN2	153	1.549	0.0915	0.007	0.01307	0.00054	0.24366	88.6	6.5	83.7	3.5	300	150	83.7	3.5	5.53047
16TO-03_99.FIN2	231.8	1.272	0.1015	0.008	0.0143	0.00044	0.14471	97.8	7.3	91.5	2.8	260	170	91.5	2.8	6.44172
16TO-03_101.FIN2	398.3	1.297	0.07	0.0033	0.01083	0.0003	0.23565	68.8	3.2	69.5	1.9	81	88	69.5	1.9	1.01744
16TO-03_102.FIN2	185.4	1.426	0.0784	0.0053	0.01166	0.00037	0.13314	77.7	5	74.7	2.4	130	130	74.7	2.4	3.861
16TO-03_103.FIN2	248	2.718	0.0693	0.0036	0.01042	0.00031	0.098322	68.1	3.5	66.8	2	170	100	66.8	2	1.90896
16TO-03_104.FIN2	155.1	3.28	0.0824	0.0056	0.01262	0.00046	0.13635	80	5.3	80.8	2.9	110	120	80.8	2.9	1
16TO-03_105.FIN2	147.4	1.462	0.103	0.0062	0.0139	0.00051	0.0395	99.7	5.8	89	3.3	360	130	89	3.3	10.7322
16TO-03_106.FIN2	166.5	1.726	0.0908	0.0057	0.01473	0.00048	0.1228	87.9	5.3	94.2	3.1	30	120	94.2	3.1	7.16724
16TO-03_107.FIN2	86.6	0.626	0.449	0.02	0.05934	0.0014	0.19691	378	14	371.5	8.2	402	89	371.5	8.2	1.71958
16TO-03_108.FIN2	572	1.569	0.0848	0.0032	0.01336	0.00041	0.23465	82.5	3	85.5	2.6	79	79	85.5	2.6	3.63636
16TO-03_109.FIN2	695	2.63	0.2416	0.01	0.0326	0.0012	0.4005	219.2	8.3	206.6	7.6	350	89	206.6	7.6	5.74818
16TO-03_110.FIN2	452	1.929	0.1812	0.0095	0.02314	0.001	0.54368	170.4	8.7	147.4	6.6	500	110	147.4	6.6	13.4977
16TO-03_111.FIN2	288	1.804	0.0922	0.0047	0.01457	0.0004	0.15977	89.7	4.5	93.2	2.5	84	94	93.2	2.5	3.9019
16TO-03_112.FIN2	216	1.163	0.1137	0.0065	0.01635	0.00056	0.223	108.9	5.9	104.5	3.6	170	110	104.5	3.6	4.0404
16TO-03_113.FIN2	100.7	1.281	2.114	0.061	0.1963	0.0043	0.36609	1155	19	1158	24	1128	45	1128	45	2.65957
16TO-03_114.FIN2	183	2.182	0.0985	0.0065	0.01457	0.00066	0.23309	94.9	6	93.2	4.2	180	130	93.2	4.2	1.79136
16TO-03_115.FIN2	176.8	1.99	1.521	0.052	0.1497	0.0044	0.57121	940	20	903	26	1017	53	1017	53	11.2094
16TO-03_116.FIN2	438	0.852	0.187	0.0072	0.02644	0.00084	0.4568	174.1	6.1	168.2	5.3	276	73	168.2	5.3	3.38886
16TO-03_117.FIN2	132	0.991	0.599	0.037	0.0691	0.0028	0.24897	476	24	431	17	700	130	431	17	9.45378
16TO-03_118.FIN2	117.1	2.38	0.1044	0.0071	0.01519	0.00046	0.046465	101.2	6.4	97.2	2.9	220	130	97.2	2.9	3.95257
16TO-03_119.FIN2	553.2	1.21	0.1824	0.0055	0.02573	0.00055	0.28569	170.4	4.6	163.8	3.5	240	64	163.8	3.5	3.87324
16TO-03_120.FIN2	419	1.436	0.0931	0.0041	0.01416	0.00045	0.1339	90.2	3.8	90.6	2.8	104	91	90.6	2.8	0.443459
16TO-03_121.FIN2	323	1.697	0.0808	0.0047	0.01235	0.00043	0.23938	79	4.5	79.1	2.7	80	110	79.1	2.7	0.126582
16TO-03_122.FIN2	120	1.253	0.1155	0.0086	0.01491	0.00055	0.0073576	110.1	7.8	95.4	3.5	340	160	95.4	3.5	13.3515
16TO-03_123.FIN2	409	1.417	0.1626	0.0059	0.0237	0.00061	0.33737	152.6	5.2	151	3.8	208	71	151	3.8	1.04849
16TO-03_124.FIN2	324	1.22	0.574	0.017	0.0741	0.0018	0.27853	459.6	11	460.9	11	454	56	460.9	11	0.282855
16TO-03_125.FIN2	552	1.274	0.1881	0.0067	0.02781	0.00077	0.32106	175.1	5.7	176.8	4.8	139	70	176.8	4.8	0.970874
16TO-03_126.FIN2	359	1.29	0.0734	0.004	0.0113	0.00039	0.1515	71.7	3.8	72.4	2.5	78	99	72.4	2.5	0.97629
GJ1-1.FIN2	378	44.8	0.818	0.023	0.099	0.0027	0.50841	605.4	13	610	15	597	53	610	15	0.759828
GJ1-2.FIN2	379	44	0.808	0.021	0.0969	0.0025	0.58533	600.3	12	596	15	600	49	596	15	0.716309
GJ1-3.FIN2	389	47.1	0.79	0.022	0.0953	0.0026	0.52128	591.9	12	587	16	594	55	587	16	0.827843
GJ1-4.FIN2	387	47.4	0.817	0.023	0.0979	0.0027	0.55696	607.8	13	602	16	575	48	602	16	0.954261
GJ1-5.FIN2	386	46.3	0.803	0.022	0.0963	0.0026	0.61434	597.1	13	592	15	596	47	592	15	0.854128
GJ1-6.FIN2	384	45.6	0.809	0.022	0.0978	0.0026	0.59858	600.8	12	601	15	635	47	601	15	0.0332889
GJ1-7.FIN2	388	45.5	0.804	0.02	0.0968	0.0024	0.37745	598.2	11	595	14	608	49	595	14	0.534938
GJ1-8.FIN2	384	45.2	0.823	0.023	0.0987	0.0026	0.52441	610	13	607	15	587	48	607	15	0.491803
GJ1-9.FIN2	383	46.1	0.804	0.023	0.0984	0.0026	0.043272	597	13	606	15	553	53	606	15	1.50754
GJ1-10.FIN2	381	45.8	0.822	0.021	0.0988	0.0025	0.51147	608.2	12	608	14	594	49	608	14	0.0328839
GJ1-11.FIN2	401	47.4	0.796	0.023	0.0957	0.0026	0.47523	594	13	589	15	605	54	589	15	0.841751
GJ1-12.FIN2	380	45.4	0.816	0.023	0.0998	0.0026	0.41307	604.4	13	613	15	590	54	613	15	1.4229
GJ1-13.FIN2	373	45.4	0.819	0.023	0.0991	0.0026	0.42098	607.2	13	609	15	600	54	609	15	0.296443
GJ1-14.FIN2	387	45	0.802	0.022	0.0973	0.0024	0.56966	598.6	12	601	14	602	46	601	14	0.400936
GJ1-15.FIN2	390	45.9	0.807	0.021	0.0976	0.0023	0.40805	599.8	12	599.9	14	612	52	599.9	14	0.0166722
GJ1-16.FIN2	382.1	45.4	0.812	0.022	0.0967	0.0024	0.40275	604.4	12	594	14	652	52	594	14	1.72071
GJ1-17.FIN2	387	46.9	0.815	0.024	0.0973	0.0028	0.60434	605	13	598	16	611	55	598	16	1.15702
GJ1-18.FIN2	382	45.6	0.8	0.027	0.0962	0.0029	0.48052	597	15	593	17	599	63	593	17	0.670017
GJ1-19.FIN2	380	45	0.814	0.023	0.0996	0.003	0.45645	604.1	13	611	18	588	62	611	18	1.1422
GJ1-20.FIN2	380	45.1	0.814	0.025	0.0984	0.0029	0.57669	604	14	605	17	584	59	605	17	0.165563
GJ1-21.FIN2	394	46.8	0.799	0.024	0.0964	0.0031	0.5931	595	13	594	18	628	54	594	18	0.168067
GJ1-22.FIN2	382	45.5	0.817	0.025	0.0972	0.0033	0.55887	604	14	597	20	653	61	597	20	1.15894
GJ1-23.FIN2	384	46.8	0.797	0.028	0.0978	0.0029	0.44658	595	15	601	17	557	65	601	17	1.0084
GJ1-24.FIN2	384	45.3	0.808	0.026	0.0975	0.0026	0.45543	601	14	601	16	602	57	601	16	0
GJ1-25.FIN2	378	45.8	0.81	0.025	0.0974	0.0029	0.43939	600	14	599	17	633	64	599	17	0.166667
GJ1-26.FIN2	387	45.8	0.806	0.028	0.0988	0.0033	0.61737	600	16	607	19	577	61	607	19	1.16667
GJ1-27.FIN2	391	46.4	0.808	0.025	0.0957	0.0034	0.53319	601	14	588	20	623	65	588	20	2.16306
GJ1-28.FIN2	382	46.1	0.82	0.027	0.0978	0.0032	0.53533	607	15	601	19	630	61	601	19	0.988468
GJ1-29.FIN2	378	45.2	0.827	0.027	0.0997	0.0031	0.62127	611	15	612	18	623	61	612	18	0.163666
GJ1-30.FIN2	389	46.7	0.81	0.025	0.0968	0.003	0.53123	603	14	595	18	618	56	595	18	1.3267
GJ1-31.FIN2	385	45.7	0.786	0.022	0.0974	0.0029	0.41589	589.9	12	598	17	536	64	598	17	1.37311
GJ1-32.FIN2	385	43.9	0.806	0.023	0.0956	0.0027	0.58642	599.8	13	588	16	659	54	588	16	1.96732
GJ1-33.FIN2	374	45.2	0.827	0.027	0.0977	0.0031	0.52604	609	15	601	18	612	61	601	18	1.31363
GJ1-34.FIN2	390	46.1	0.818	0.026	0.0985	0.0029	0.55319	606	15	605	17	581	59	605	17	0.165017
GJ1-35.FIN2	388	46.4	0.808	0.026	0.0989	0.0031	0.50347	602	15	608	18	584	60	608	18	0.996678
GJ1-36.FIN2	384	45.2	0.805	0.024	0.0967	0.0029	0.46896	599	13	595	17	610	58	595	17	0.66778
GJ1-37.FIN2	376	45.3	0.821	0.026	0.0993	0.0033	0.48638	608	15	610	19	597	66	610	19	0.328947
GJ1-38.FIN2	388	47.2	0.81	0.026	0.0951	0.003	0.5012	602	14	585	18	642	61	585	18	2.82392
GJ1-39.FIN2	391	45.8	0.792	0.025	0.0997	0.0032	0.39026	595	14	612	19	540	65	612	19	2.85714
GJ1-40.FIN2	378	46.3	0.814	0.024	0.0977	0.0029	0.60092	604	13	600	17	619	54	600	17	0.662252
GJ1-41.FIN2	385	46.9	0.818	0.025	0.0979	0.0027	0.45589	607	14	601	16	600	58	601	16	0.988468
GJ1-42.FIN2	379	45.5	0.819	0.026	0.0984	0.0032	0.48087	610	15	605	19	631	61	605	19	0.819672
GJ1-43.FIN2	388	45.2	0.813	0.026	0.096	0.003	0.54387	604	14	590	17	641	60	590	17	2.31788
GJ1-44.FIN2	383	44.7	0.806	0.023	0.0996	0.0029	0.35507	598.7	13	612	17	552	66	612	17	2.22148
GJ1-45.FIN2	385	46.2	0.802	0.025	0.0969	0.003	0.46456	597	14	596	18	576	62	596	18	0.167504
GJ1-46.FIN2	388	44.6	0.803	0.024	0.0977	0.0027	0.44335	597	13	600	16	580	59	600	16	0.502513
GJ1-47.FIN2	384	45.2	0.813	0.024	0.0979	0.0027	0.29839	605	13	602	16	597	62	602	16	0.495868
GJ1-48.FIN2	388	46.2	0.802	0.025	0.0988	0.0029	0.54443	597	14	607	17	540	61	607	17	1.67504
GJ1-49.FIN2	385	46.6	0.826	0.024	0.0969	0.0029	0.54178	611	13	597	17	628	60	597	17	2.29133
GJ1-50.FIN2	381	45.9	0.807	0.024	0.0951	0.0029	0.41084	599	13	585	17	631	62	585	17	2.33723
GJ1-51.FIN2	375	45.1	0.798	0.024	0.0976	0.0031	0.32065	594	13	600	18	559	66	600	18	1.0101
GJ1-52.FIN2	395	46.6	0.796	0.023	0.0961	0.0032	0.55951	595	13	591	19	592	59	591	19	0.672269
GJ1-53.FIN2	381	45.5	0.808	0.024	0.0976	0.0029	0.42528	599	13	600	17	621	61	600	17	0.166945
GJ1-54.FIN2	387	46.5	0.823	0.023	0.0989	0.0028	0.3315	610.5	13	608	16	638	60	608	16	0.4095
GJ1-55.FIN2	379	45.9	0.823	0.027	0.0978	0.0035	0.54928	607	15	601	20	627	63	601	20	0.988468
GJ1-56.FIN2	384	45	0.804	0.025	0.0986	0.0031	0.57432	600	14	606	18	580	68	606	18	1
GJ1-57.FIN2	388	45.8	0.816	0.025	0.096	0.003	0.48626	606	14	590	17	626	67	590	17	2.64026
GJ1-58.FIN2	383	45.4	0.815	0.025	0.0988	0.0029	0.5212	603	14	607	17	545	62	607	17	0.66335
GJ1-59.FIN2	386	47.3	0.786	0.024	0.0971	0.0031	0.42599	588	14	597	18	568	67	597	18	1.53061
GJ1-60.FIN2	371	45.7	0.837	0.027	0.0999	0.0034	0.54331	618	15	613	20	597	61	613	20	0.809061
GJ1-61.FIN2	396	45.1	0.8	0.023	0.0961	0.0031	0.50064	597	13	593	18	598	61	593	18	0.670017
GJ1-62.FIN2	385	45.3	0.811	0.025	0.0975	0.0033	0.61123	601	14	599	19	592	53	599	19	0.332779
Pak1-1.FIN2	259.4	1.27	0.0438	0.003	0.00691	0.00024	0.1334	43.6	2.9	44.4	1.5	50	120	44.4	1.5	1.83486
Pak1-2.FIN2	274.1	1.258	0.0438	0.0028	0.00693	0.00025	0.24439	43.4	2.7	44.5	1.6	70	110	44.5	1.6	2.53456
Pak1-3.FIN2	296.5	1.216	0.0428	0.0028	0.00702	0.00025	0.21293	42.5	2.7	45.1	1.6	-40	110	45.1	1.6	6.11765
Pak1-4.FIN2	315.7	1.249	0.0431	0.0026	0.00679	0.00026	0.017484	42.8	2.5	43.6	1.7	80	120	43.6	1.7	1.86916
Pak1-5.FIN2	222.3	1.247	0.0435	0.0033	0.00669	0.00023	0.085819	43.4	3.1	43	1.5	130	140	43	1.5	0.921659
Pak1-6.FIN2	219.8	1.224	0.0418	0.0033	0.00681	0.00025	0.20456	41.4	3.2	43.8	1.6	10	140	43.8	1.6	5.7971
Pak1-7.FIN2	210.3	1.267	0.0472	0.0037	0.00689	0.00025	0.032882	46.7	3.6	44.3	1.6	150	140	44.3	1.6	5.13919
Pak1-8.FIN2	201	1.289	0.0435	0.0034	0.00697	0.00024	0.044053	43.1	3.3	44.7	1.5	40	140	44.7	1.5	3.7123
Ples-1.FIN2	442	9.26	0.409	0.013	0.0558	0.0016	0.42078	347.6	9	350	9.6	281	64	350	9.6	0.690449
Ples-2.FIN2	519	8.02	0.4046	0.012	0.0554	0.0015	0.52373	345.6	8.3	347.3	9.2	340	58	347.3	9.2	0.491898
Ples-3.FIN2	614	9.18	0.611	0.021	0.0575	0.0018	0.56314	484	13	360.9	11	1080	55	DISC	DISC	25.4339
Ples-4.FIN2	606	9.76	0.4101	0.011	0.0561	0.0016	0.51342	348.4	8	351.8	9.7	315	56	351.8	9.7	0.97589
Ples-5.FIN2	564	9.04	0.409	0.013	0.0544	0.0014	0.59715	347.7	9	341.5	8.8	371	55	341.5	8.8	1.78315
Ples-6.FIN2	444.4	9.5	0.3958	0.012	0.05302	0.0013	0.33544	337.8	8.6	332.9	8	372	57	332.9	8	1.45056
Ples-7.FIN2	585	7.23	0.4023	0.011	0.056	0.0015	0.33744	343.9	8.4	351	9.3	317	58	351	9.3	2.06455
Ples-8.FIN2	707	7.99	0.531	0.018	0.0577	0.0015	0.41211	432.2	12	361.4	9.2	817	61	DISC	DISC	16.3813

## Sheet: 16TO02,08,13b
Sample Name:				2σ Prop		2σ Prop		207/235	2σ Prop	206/238	2σ Prop	207/206	2σ Prop	Best age	2σ Prop
Grain #	[U] ppm	U/Th	207/235	error	206/238	error	RHO	Age Ma	error	Age (Ma)	error	Age (Ma)	error	(Ma)	error	% Discordance*	Rim/Core
16To_02_1.FIN2	163.9	1.633	0.0941	0.0035	0.0139	0.00027	0.067444	91.2	3.2	89	1.7	188	72	89	1.7	2.41228
16To_02_2.FIN2	305	1.652	4.588	0.12	0.3261	0.0053	0.57966	1746.9	21	1819	26	1677	36	1677	36	8.4675
16To_02_3.FIN2	507.1	2.17	0.103	0.0031	0.01533	0.00028	0.23656	99.5	2.9	98.1	1.8	153	56	98.1	1.8	1.40704
16To_02_4.FIN2	360	0.896	0.1861	0.0052	0.02727	0.00048	0.25283	173.2	4.5	173.4	3	180	54	173.4	3	0.115473
16To_02_5.FIN2	748	2.49	3.271	0.089	0.258	0.0052	0.50306	1474	21	1479	27	1462	45	1462	45	1.16279
16To_02_6.FIN2	78.7	1.886	1.889	0.058	0.1899	0.0041	0.35171	1076	20	1120	22	995	54	995	54	12.5628
16To_02_7.FIN2	545	6.43	0.595	0.023	0.0767	0.0025	0.64442	472	15	477	14	477	64	477	14	1.05932
16To_02_8.FIN2	353	1.99	0.0698	0.0026	0.01037	0.00019	0.17995	68.4	2.5	66.48	1.2	162	74	66.48	1.2	2.80702
16To_02_10.FIN2	412	2.448	0.113	0.0052	0.01639	0.00054	0.37287	108.5	4.7	104.8	3.4	209	84	104.8	3.4	3.41014
16To_02_11.FIN2	72.6	1.643	0.0874	0.0062	0.01242	0.0005	0.35034	84.9	5.8	79.5	3.2	250	140	79.5	3.2	6.36042
16To_02_12.FIN2	326	1.465	0.1009	0.0035	0.01527	0.00034	0.27652	97.5	3.2	97.7	2.2	125	68	97.7	2.2	0.205128
16To_02_13.FIN2	734	2.723	0.0955	0.0028	0.01429	0.00031	0.43665	92.6	2.6	91.5	1.9	116	55	91.5	1.9	1.1879
16To_02_14.FIN2	41.9	1.748	1.849	0.054	0.1791	0.0033	0.23392	1063	19	1062	18	1039	55	1039	55	2.21367
16To_02_15.FIN2	174.8	0.986	0.2479	0.0082	0.03504	0.00061	0.22893	224.6	6.7	222	3.8	221	63	222	3.8	1.15761
16To_02_16.FIN2	153.2	1.22	0.0713	0.0041	0.01056	0.00032	0.26831	69.8	3.9	67.7	2	116	110	67.7	2	3.0086
16To_02_17.FIN2	164	1.491	0.3321	0.011	0.04475	0.0008	0.25374	290.7	8.1	282.2	5	331	64	282.2	5	2.92398
16To_02_19.FIN2	485	1.827	0.1797	0.0063	0.02716	0.00084	0.62224	168	5.5	172.7	5.3	114	63	172.7	5.3	2.79762
16To_02_20.FIN2	613	3.06	0.071	0.0024	0.01092	0.00026	0.4597	69.8	2.2	70	1.7	74	59	70	1.7	0.286533
16To_02_21.FIN2	333	1.026	0.6122	0.016	0.07838	0.0014	0.40183	484.7	10	486.4	8.2	460	51	486.4	8.2	0.350732
16To_02_23.FIN2	136	1.26	0.1153	0.005	0.01581	0.00034	0.078363	110.6	4.6	101.1	2.2	297	95	101.1	2.2	8.58951
16To_02_24.FIN2	84	0.862	0.0853	0.0045	0.01277	0.00033	0.13828	83.3	4.3	81.8	2.1	139	100	81.8	2.1	1.80072
16To_02_25.FIN2	449.3	1.325	0.1145	0.0039	0.0174	0.0004	0.40449	110.2	3.5	111.2	2.6	110	60	111.2	2.6	0.907441
16To_02_26.FIN2	91.2	2.027	0.0955	0.005	0.01422	0.00036	0.22128	92.3	4.6	91	2.3	177	99	91	2.3	1.40845
16To_02_27.FIN2	95.7	1.277	0.588	0.018	0.07625	0.0014	0.42605	469	12	473.6	8.6	446	58	473.6	8.6	0.98081
16To_02_28.FIN2	201.8	1.047	0.2096	0.0076	0.03013	0.00061	0.209	193.3	6.4	191.3	3.8	225	73	191.3	3.8	1.03466
16To_02_29.FIN2	377	1.216	0.1774	0.0053	0.02592	0.00046	0.3484	165.7	4.6	164.9	2.9	174	57	164.9	2.9	0.4828
16To_02_30.FIN2	396	1.384	0.3338	0.0098	0.04634	0.00088	0.43783	292.6	7.3	292.3	5.3	285	56	292.3	5.3	0.102529
16To_02_31.FIN2	214.4	1.169	0.1122	0.0041	0.01659	0.00031	0.039033	107.8	3.8	106	2	149	72	106	2	1.66976
16To_02_32.FIN2	755	3.15	0.0732	0.0024	0.01103	0.00025	0.25218	71.7	2.3	70.7	1.6	115	68	70.7	1.6	1.3947
16To_02_33.FIN2	512	1.562	0.3046	0.009	0.04371	0.00082	0.28809	269.7	7	275.8	5	216	56	275.8	5	2.26177
16To_02_34.FIN2	323	1.808	0.0743	0.0029	0.01113	0.00024	0.22001	72.9	2.7	71.4	1.5	111	73	71.4	1.5	2.05761
16To_02_35.FIN2	475	1.745	0.0683	0.0024	0.01049	0.00022	0.41176	67	2.2	67.3	1.4	94	61	67.3	1.4	0.447761
16To_02_36.FIN2	112.7	1.33	4.948	0.14	0.3434	0.0071	0.56559	1811	24	1902	34	1686	43	1686	43	12.8114
16To_02_37.FIN2	338.4	2.078	0.07	0.0025	0.01099	0.0002	0.064788	68.9	2.4	70.45	1.3	47	68	70.45	1.3	2.24964
16To_02_38.FIN2	312	2.114	0.0745	0.0028	0.01113	0.0002	0.062076	72.9	2.7	71.36	1.3	128	73	71.36	1.3	2.11248
16To_02_39.FIN2	39.5	0.849	0.085	0.0067	0.01267	0.00038	0.0043324	82.8	6.3	81.2	2.4	110	140	81.2	2.4	1.93237
16To_02_40.FIN2	350	1.264	0.1086	0.0044	0.01576	0.00033	0.24366	104.6	4	100.8	2.1	242	82	100.8	2.1	3.63289
16To_02_42.FIN2	383	0.94	0.2007	0.0069	0.02942	0.0008	0.51326	185.9	5.8	186.9	5	185	65	186.9	5	0.537924
16To_02_43.FIN2	245	1.027	0.2533	0.0076	0.03648	0.00065	0.24986	229	6.2	231	4	187	56	231	4	0.873362
16To_02_44.FIN2	421	3.051	0.0693	0.0024	0.01081	0.0002	0.25723	68	2.3	69.3	1.3	46	59	69.3	1.3	1.91176
16To_02_45.FIN2	708	0.994	0.1925	0.0058	0.02785	0.00055	0.32975	178.7	5	177.1	3.5	192	60	177.1	3.5	0.895355
16To_02_46.FIN2	18.15	0.769	3.381	0.11	0.262	0.0056	0.24712	1500	27	1499	29	1502	59	1502	59	0.199734
16To_02_47.FIN2	395	1.655	0.3376	0.01	0.04722	0.0011	0.54724	295.1	7.8	297.4	6.8	260	58	297.4	6.8	0.779397
16To_02_48.FIN2	176	1.064	4.488	0.13	0.3111	0.0061	0.70064	1728	23	1745	30	1700	39	1700	39	2.64706
16To_02_49.FIN2	315.3	1.94	0.1474	0.0047	0.02157	0.00038	0.20026	139.8	4.2	137.6	2.4	145	57	137.6	2.4	1.57368
16To_02_50.FIN2	146.3	1.318	0.0995	0.0044	0.01475	0.00039	0.34853	96.5	4.1	94.4	2.5	167	84	94.4	2.5	2.17617
16To_02_51.FIN2	259	1.116	0.3327	0.0099	0.04655	0.0011	0.47947	291.2	7.5	293.3	6.5	261	56	293.3	6.5	0.721154
16To_02_52.FIN2	34.4	2.52	0.1261	0.01	0.01615	0.00058	0.1715	119.4	9.3	103.2	3.6	400	150	103.2	3.6	13.5678
16To_02_53.FIN2	385	1.871	0.1014	0.0051	0.01565	0.00066	0.32685	98	4.7	100.1	4.2	120	110	100.1	4.2	2.14286	Rim
16To_02_53.FIN2	245.6	1.871	0.1253	0.0057	0.01846	0.00051	0.36189	120.3	5.1	117.9	3.2	119	82	117.9	3.2	1.99501	Core
16To_02_55.FIN2	322	3.724	0.3509	0.012	0.04768	0.0012	0.59018	305	8.7	300.2	7.1	325	62	300.2	7.1	1.57377
16To_02_56.FIN2	233	2.22	0.0907	0.0039	0.01399	0.0003	0.15498	88.6	3.7	89.6	1.9	81	79	89.6	1.9	1.12867
16To_02_57.FIN2	147	2.306	0.1107	0.005	0.01582	0.00043	0.2359	106.7	4.5	101.2	2.7	199	83	101.2	2.7	5.15464
16To_02_58.FIN2	56.1	1.433	0.1002	0.0065	0.01446	0.00044	0.082729	96.4	6	92.5	2.8	150	120	92.5	2.8	4.04564
16To_02_60.FIN2	181.5	1.489	0.0935	0.0036	0.01406	0.00026	0.012836	90.9	3.3	90	1.7	117	75	90	1.7	0.990099
16To_02_61.FIN2	117.7	0.508	0.2303	0.011	0.02801	0.00065	0.39177	212.3	8.6	178.1	4.1	606	92	DISC	DISC	16.1093
16To_02_62.FIN2	332	1.909	0.0702	0.0027	0.01072	0.00023	0.13434	68.8	2.5	68.7	1.5	102	73	68.7	1.5	0.145349
16To_02_63.FIN2	148	1.275	0.0774	0.0061	0.01178	0.00072	0.40862	76.1	5.8	75.5	4.6	90	140	75.5	4.6	0.788436
16To_02_64.FIN2	96.1	0.703	0.1684	0.0067	0.02487	0.00056	0.12143	158.6	5.8	158.3	3.5	204	79	158.3	3.5	0.189155
16To_02_65.FIN2	446	43.6	0.2904	0.0082	0.04079	0.00076	0.4214	259.5	6.5	257.7	4.7	270	55	257.7	4.7	0.693642
16To_02_66.FIN2	386	2.004	0.3198	0.0098	0.04492	0.001	0.58149	281.8	7.7	283.2	6.3	259	56	283.2	6.3	0.496806
16To_02_67.FIN2	71	0.833	0.1778	0.0075	0.02583	0.00062	0.14924	165.7	6.5	164.4	3.9	189	85	164.4	3.9	0.78455
16To_02_68.FIN2	97.7	0.96	0.194	0.0088	0.02844	0.00068	0.25739	180.4	7.7	180.8	4.3	141	88	180.8	4.3	0.221729
16To_02_69.FIN2	273	3.1	0.334	0.011	0.0462	0.0012	0.43192	292.1	8.4	291.1	7.5	314	70	291.1	7.5	0.342349
16To_02_71.FIN2	94.4	1.295	0.0899	0.0051	0.01193	0.00029	0.071744	88.2	4.6	76.4	1.8	370	120	76.4	1.8	13.3787
16To_02_72.FIN2	233	1.46	0.0875	0.0034	0.01311	0.00029	0.24164	85	3.1	84	1.9	122	74	84	1.9	1.17647
16To_02_73.FIN2	120.3	0.4363	4.352	0.11	0.3196	0.0064	0.48817	1703.2	22	1787	31	1592	43	1592	43	12.2487
16To_02_74.FIN2	116.7	1.086	0.0895	0.0044	0.01261	0.00029	0.11485	86.8	4.1	80.8	1.9	191	96	80.8	1.9	6.91244
16To_02_75.FIN2	90.8	1.593	1.84	0.056	0.177	0.0038	0.61339	1060	20	1052	21	1075	47	1075	47	2.13953
16To_02_76.FIN2	671	3.31	0.0808	0.0037	0.0107	0.00036	0.52054	78.8	3.5	68.6	2.3	354	90	68.6	2.3	12.9442
16To_02_77.FIN2	61.1	2.4	0.1131	0.0061	0.01623	0.00041	0.10103	108.4	5.6	103.8	2.6	188	100	103.8	2.6	4.24354
16To_02_78.FIN2	243	3.48	0.0993	0.0034	0.01484	0.0003	0.23746	96	3.2	95	1.9	113	66	95	1.9	1.04167
16To_02_79.FIN2	220.9	1.823	0.0945	0.0038	0.01476	0.00034	0.15228	91.8	3.5	94.5	2.2	32	72	94.5	2.2	2.94118
16To_02_80.FIN2	147.7	2.92	0.0875	0.0038	0.01315	0.00031	0.20925	85.1	3.5	84.2	2	159	83	84.2	2	1.05758
16To_02_81.FIN2	211	1.561	0.0866	0.0046	0.01309	0.00032	0.23863	84.2	4.3	83.8	2	62	92	83.8	2	0.475059
16To_02_82.FIN2	63.1	2.115	2.249	0.066	0.2065	0.0041	0.44788	1195	20	1211	22	1145	49	1145	49	5.76419
16To_02_83.FIN2	324.6	4.726	0.072	0.0026	0.01089	0.00021	0.090755	70.6	2.4	69.82	1.3	90	70	69.82	1.3	1.10482
16To_02_84.FIN2	262	1.83	0.0707	0.0028	0.0108	0.00022	0.239	69.3	2.7	69.2	1.4	79	70	69.2	1.4	0.1443
16To_02_85.FIN2	83.4	1.776	0.1716	0.0083	0.02419	0.00066	0.16917	161.2	7	154.1	4.1	269	98	154.1	4.1	4.40447
16To_02_86.FIN2	56.1	2.276	0.0937	0.0058	0.01517	0.00037	0.095466	90.6	5.4	97	2.4	-40	110	97	2.4	7.06402
16To_02_87.FIN2	371	2.68	0.3293	0.011	0.04573	0.0011	0.34667	288.8	8.4	288.2	6.9	332	79	288.2	6.9	0.207756
16To_02_88.FIN2	341	1.914	0.3077	0.0089	0.0428	0.00082	0.46794	272.5	7	270.1	5.1	270	55	270.1	5.1	0.880734
16To_02_89.FIN2	173.8	2.256	0.0865	0.0036	0.01286	0.0003	0.33754	84.1	3.3	82.4	1.9	114	75	82.4	1.9	2.0214
16To_02_90.FIN2	173.6	2.022	0.1105	0.0048	0.01595	0.00045	0.2525	106.2	4.4	102	2.8	183	87	102	2.8	3.9548
16To_02_91.FIN2	276	1.434	0.1997	0.0097	0.0288	0.0013	0.5687	184.1	8.2	183	7.9	228	85	183	7.9	0.597501
16To_02_92.FIN2	381	4.25	0.0991	0.0039	0.01462	0.00034	0.37253	95.7	3.6	93.5	2.2	177	73	93.5	2.2	2.29885
16To_02_93.FIN2	72.38	0.4981	0.2272	0.0091	0.03145	0.00062	0.060282	207.4	7.5	199.6	3.8	292	83	199.6	3.8	3.76085
16To_02_94.FIN2	803	1.769	0.1348	0.0043	0.02005	0.00046	0.50793	128.3	3.9	127.9	2.9	140	58	127.9	2.9	0.311769
16To_02_95.FIN2	230	1.466	0.3078	0.0088	0.04329	0.00078	0.25411	272.6	6.9	273.1	4.8	281	58	273.1	4.8	0.183419
16To_02_96.FIN2	258	2.345	0.0711	0.0028	0.01081	0.00024	0.27222	69.9	2.6	69.3	1.5	134	71	69.3	1.5	0.858369
16To_02_97.FIN2	90.8	2.13	0.1024	0.0048	0.01538	0.00032	0.14391	99.1	4.4	98.4	2.1	154	87	98.4	2.1	0.706357
16To_02_98.FIN2	104.5	2.84	0.1125	0.0054	0.01714	0.00042	0.17776	108.7	4.9	109.6	2.7	167	92	109.6	2.7	0.827967
16To_02_99.FIN2	88.9	2.207	0.0978	0.0057	0.01468	0.00041	0.27486	94.4	5.2	93.9	2.6	150	110	93.9	2.6	0.529661
16To_02_100.FIN2	248	3.721	0.1057	0.005	0.01649	0.00046	0.32919	101.8	4.6	105.4	2.9	80	84	105.4	2.9	3.53635
16To_02_101.FIN2	101.8	1.46	0.577	0.018	0.07531	0.0014	0.27037	461.9	11	468	8.5	454	62	468	8.5	1.32063
16To_02_102.FIN2	141.6	1.587	0.0701	0.0033	0.01051	0.00023	0.03563	68.7	3.1	67.4	1.5	127	91	67.4	1.5	1.89229
16To_02_103.FIN2	128.9	2.253	0.0975	0.0043	0.01322	0.00029	0.12094	94.6	4	84.6	1.9	350	88	84.6	1.9	10.5708
16To_02_104.FIN2	576	3.3	0.071	0.0024	0.01078	0.00022	0.32905	69.7	2.2	69.1	1.4	106	61	69.1	1.4	0.860832
16To_02_106.FIN2	192	1.272	0.0745	0.0038	0.01069	0.00032	0.23769	73	3.7	68.6	2	242	100	68.6	2	6.0274
16To_02_107.FIN2	433	1.69	0.1225	0.0087	0.0158	0.0012	0.44866	117.1	7.9	101.2	7.3	420	180	101.2	7.3	13.5781
16To_02_108.FIN2	235	2.35	0.33	0.013	0.0432	0.0014	0.52826	289.6	9.9	272.4	8.4	383	74	272.4	8.4	5.93923
16To_02_109.FIN2	181.6	1.667	0.0934	0.0038	0.01423	0.00032	0.17131	90.8	3.5	91.1	2	97	77	91.1	2	0.330396
16To_02_111.FIN2	428	4.77	0.308	0.013	0.0431	0.0015	0.36767	272.4	9.7	271.6	9.1	222	84	271.6	9.1	0.293686	Rim
16To_02_111.FIN2	74.1	1.314	2.02	0.2	0.157	0.013	0.97182	1108	70	935	73	1505	57	DISC	DISC	37.8738	Core
16To_02_112.FIN2	205	0.998	4.364	0.13	0.3093	0.0073	0.71078	1705	25	1740	37	1674	42	1674	42	3.94265
16To_02_113.FIN2	776	2.314	0.0703	0.0022	0.01082	0.0002	0.10177	68.9	2	69.36	1.3	63	57	69.36	1.3	0.667634
16To_02_114.FIN2	151.2	1.628	0.0956	0.0041	0.01411	0.00027	0.23442	92.5	3.8	90.3	1.7	196	83	90.3	1.7	2.37838
16To_02_115.FIN2	436	2.819	0.0671	0.0023	0.01022	0.00022	0.23988	66	2.1	65.6	1.4	112	65	65.6	1.4	0.606061
16To_02_116.FIN2	244	3.01	0.699	0.026	0.0832	0.0025	0.4626	537	16	515	15	601	74	515	15	4.09683
16To_02_117.FIN2	215.4	1.797	4.344	0.11	0.3107	0.0055	0.44522	1701.7	21	1746	27	1657	40	1657	40	5.37115
16To_02_118.FIN2	87.2	1.537	0.2999	0.01	0.04219	0.00078	0.108	265.7	8	266.4	4.8	265	68	266.4	4.8	0.263455
16To_02_119.FIN2	159.5	3.374	0.0933	0.0043	0.01358	0.00034	0.29705	90.9	3.9	87	2.2	200	89	87	2.2	4.29043
16To_02_120.FIN2	88.1	0.965	0.0912	0.0046	0.01291	0.00033	0.099616	88.8	4.2	82.7	2.1	244	110	82.7	2.1	6.86937
16To_02_121.FIN2	125.5	3.229	0.107	0.0043	0.01589	0.00036	0.20754	103.1	4	101.6	2.3	149	76	101.6	2.3	1.4549
16To_02_122.FIN2	492	1.838	0.1013	0.0033	0.0153	0.00031	0.44146	98.1	3.1	97.9	2	117	59	97.9	2	0.203874
16To_02_123.FIN2	119.3	2.077	0.09	0.0045	0.01348	0.0003	0.29975	88	4.1	86.3	1.9	163	87	86.3	1.9	1.93182
16To_02_124.FIN2	647	1.154	0.295	0.0084	0.04203	0.00076	0.48128	262.3	6.6	265.4	4.7	268	53	265.4	4.7	1.18185
16To_02_125.FIN2	302	1.301	0.0707	0.0027	0.01062	0.00022	0.21399	69.3	2.6	68.1	1.4	135	73	68.1	1.4	1.7316
16To_02_126.FIN2	420	2.773	0.0821	0.0029	0.01197	0.00025	0.19669	80.1	2.7	76.7	1.6	209	73	76.7	1.6	4.24469
16To_02_127.FIN2	353.5	2.319	0.0703	0.0025	0.01096	0.00023	0.12949	69	2.4	70.3	1.5	83	69	70.3	1.5	1.88406
16To_02_129.FIN2	549	7.55	3.96	0.12	0.271	0.0077	0.6085	1628	26	1544	39	1725	45	1725	45	10.4928
16To_02_130.FIN2	401	1.873	0.0691	0.0028	0.01059	0.00025	0.20163	67.8	2.7	67.9	1.6	115	73	67.9	1.6	0.147493
16To_08_3.FIN2	153.8	2.833	0.149	0.005	0.02217	0.0004	0.2467	140.9	4.4	141.3	2.5	142	64	141.3	2.5	0.283889
16To_08_4.FIN2	22.85	1.077	2.2	0.064	0.2069	0.0036	0.18945	1185	21	1212	19	1150	52	1150	52	5.3913
16To_08_5.FIN2	160	1.786	3.167	0.093	0.2572	0.0059	0.52417	1452	24	1474	30	1429	48	1429	48	3.14906
16To_08_6.FIN2	144.6	1.951	0.213	0.0075	0.03077	0.0006	0.20779	196.2	6.4	195.4	3.8	214	69	195.4	3.8	0.407747
16To_08_7.FIN2	434	8.31	3.282	0.094	0.2601	0.0061	0.67162	1475	23	1489	31	1449	44	1449	44	2.76052
16To_08_8.FIN2	542.6	28.5	4.447	0.12	0.3106	0.0057	0.50008	1720.8	21	1743	28	1712	39	1712	39	1.81075
16To_08_9.FIN2	270	3.62	0.0992	0.0036	0.01471	0.0003	0.27764	95.9	3.3	94.1	1.9	130	67	94.1	1.9	1.87696
16To_08_10.FIN2	205.1	4.68	0.0991	0.0036	0.01467	0.00027	0.098018	95.9	3.3	93.9	1.7	159	67	93.9	1.7	2.08551
16To_08_11.FIN2	146.6	1.413	0.245	0.009	0.03497	0.00084	0.17949	222.2	7.3	221.5	5.2	224	79	221.5	5.2	0.315032
16To_08_12.FIN2	413	1.979	0.0854	0.0032	0.0132	0.00031	0.34772	83.1	3	84.5	2	33	63	84.5	2	1.68472
16To_08_13.FIN2	374.1	1.045	0.0945	0.0038	0.01338	0.00028	0.13548	91.7	3.5	85.7	1.8	283	86	85.7	1.8	6.54308
16To_08_14.FIN2	351	1.177	0.1014	0.004	0.01493	0.00032	0.09132	97.9	3.7	95.6	2	151	71	95.6	2	2.34934
16To_08_15.FIN2	111.9	1.007	0.4145	0.014	0.05573	0.00096	0.18932	351.3	9.7	349.6	5.9	360	62	349.6	5.9	0.483917
16To_08_16.FIN2	206.9	2.543	1.764	0.045	0.1763	0.0031	0.42092	1032.3	16	1047	17	1013	41	1013	41	3.35637
16To_08_17.FIN2	88.2	0.7659	0.0784	0.0044	0.01265	0.00029	0.14225	76.8	4.2	81	1.9	34	99	81	1.9	5.46875
16To_08_18.FIN2	238	2.305	3.341	0.089	0.2705	0.0053	0.69509	1491.4	21	1542	27	1403	41	1403	41	9.90734
16To_08_19.FIN2	738	1.392	0.2167	0.007	0.03054	0.00068	0.49586	198.9	5.8	193.9	4.2	264	56	193.9	4.2	2.51383
16To_08_20.FIN2	313.6	1.345	0.0821	0.0029	0.01235	0.00023	0.065679	80.1	2.8	79.11	1.5	124	69	79.11	1.5	1.23596
16To_08_21.FIN2	124.4	0.899	0.0701	0.0049	0.01068	0.00048	0.42234	68.4	4.7	68.4	3	150	130	68.4	3	0
16To_08_22.FIN2	235	1.448	0.1025	0.0043	0.01414	0.0003	0.17685	99	3.9	90.5	1.9	289	82	90.5	1.9	8.58586
16To_08_23.FIN2	276.1	3.19	1.991	0.066	0.187	0.005	0.64192	1111	22	1103	27	1108	52	1108	52	0.451264
16To_08_24.FIN2	349	3.61	0.0863	0.003	0.01298	0.00026	0.26781	84	2.8	83.1	1.6	127	64	83.1	1.6	1.07143
16To_08_25.FIN2	414	1.209	0.112	0.0037	0.01719	0.00034	0.38519	107.7	3.3	109.9	2.1	73	56	109.9	2.1	2.04271
16To_08_26.FIN2	72.8	1.735	0.108	0.0056	0.01605	0.00041	0.049067	104.2	5.2	102.6	2.6	156	100	102.6	2.6	1.53551
16To_08_27.FIN2	111.3	2.839	0.1152	0.0057	0.01484	0.00036	0.21155	112.2	5.5	95	2.3	476	110	DISC	DISC	15.3298
16To_08_28.FIN2	271	3.56	0.0916	0.004	0.01281	0.00041	0.30873	88.8	3.7	82	2.6	251	86	82	2.6	7.65766
16To_08_29.FIN2	216.5	3.693	0.0947	0.0041	0.01418	0.00035	0.43071	91.7	3.8	90.8	2.2	142	78	90.8	2.2	0.981461
16To_08_30.FIN2	65.5	3.04	2.36	0.074	0.2118	0.0045	0.51204	1227	22	1238	24	1220	50	1220	50	1.47541
16To_08_31.FIN2	187.5	4.89	0.3193	0.0099	0.04495	0.00088	0.38277	280.9	7.6	283.4	5.4	244	58	283.4	5.4	0.889996
16To_08_32.FIN2	203	0.862	0.1611	0.0056	0.02379	0.00047	0.22473	151.5	4.9	151.6	3	155	67	151.6	3	0.0660066
16To_08_33.FIN2	410	6.19	4.411	0.11	0.3131	0.0055	0.60867	1714.2	21	1755	27	1666	36	1666	36	5.34214
16To_08_34.FIN2	213.9	1.018	0.2578	0.0084	0.03611	0.00066	0.26263	233.4	6.9	228.6	4.1	265	63	228.6	4.1	2.05656
16To_08_35.FIN2	132.7	1.417	0.1028	0.0097	0.01511	0.00075	0.16205	99.2	8.9	96.7	4.7	150	200	96.7	4.7	2.52016
16To_08_36.FIN2	152.8	2.65	2.105	0.084	0.1904	0.0055	0.90744	1145	28	1125	30	1163	44	1163	44	3.26741
16To_08_37.FIN2	61.2	2.016	0.1162	0.008	0.01606	0.00044	0.065129	111	7.2	102.7	2.8	280	130	102.7	2.8	7.47748
16To_08_38.FIN2	124.2	2.632	0.0908	0.0044	0.013	0.0003	0.1611	88	4.1	83.2	1.9	181	95	83.2	1.9	5.45455
16To_08_39.FIN2	248	2.23	3.328	0.089	0.2676	0.0046	0.72397	1487.9	21	1529	23	1421	38	1421	38	7.60028
16To_08_40.FIN2	420	3.2	0.094	0.0034	0.0139	0.00034	0.34549	91.1	3.1	89	2.2	137	67	89	2.2	2.30516
16To_08_41.FIN2	85.6	1.458	0.1036	0.0053	0.01535	0.00037	0.23509	99.8	4.8	98.2	2.3	157	95	98.2	2.3	1.60321
16To_08_42.FIN2	166.9	1.51	1.34	0.041	0.1366	0.0029	0.55899	862	18	826	17	918	50	826	17	4.17633
16To_08_43.FIN2	321.5	1.692	0.0791	0.003	0.0118	0.00027	0.28918	77.4	2.8	75.6	1.7	100	68	75.6	1.7	2.32558
16To_08_44.FIN2	87.7	1.931	3.94	0.22	0.286	0.015	0.84234	1613	46	1618	77	1579	59	1579	59	2.46992
16To_08_45.FIN2	109	1.081	5.368	0.14	0.3419	0.0061	0.58765	1878.4	22	1895	29	1855	38	1855	38	2.15633
16To_08_46.FIN2	94.2	1.035	0.0815	0.0048	0.01183	0.0003	0.023726	79.6	4.5	75.8	1.9	210	120	75.8	1.9	4.77387
16To_08_47.FIN2	122.5	2.2	0.0783	0.0055	0.01236	0.00048	0.46287	76.7	5.2	79.2	3.1	90	110	79.2	3.1	3.25945
16To_08_48.FIN2	552	1.791	0.0972	0.0029	0.0147	0.00026	0.25595	94.1	2.7	94.13	1.6	98	55	94.13	1.6	0.031881
16To_08_49.FIN2	351	2.79	0.4706	0.013	0.06283	0.0011	0.47516	391.7	8.9	392.8	6.9	378	51	392.8	6.9	0.280827
16To_08_50.FIN2	241.4	1.651	0.1116	0.0049	0.01701	0.00054	0.18732	107.2	4.5	108.7	3.4	88	90	108.7	3.4	1.39925
16To_08_51.FIN2	33.6	1.316	2.012	0.068	0.1812	0.0043	0.5697	1119	23	1073	23	1174	53	1174	53	8.60307
16To_08_52.FIN2	377	1.378	0.0797	0.0027	0.01185	0.00022	0.25932	78	2.6	75.97	1.4	145	65	75.97	1.4	2.60256
16To_08_53.FIN2	526	1.704	0.0851	0.0028	0.01296	0.00026	0.31841	82.9	2.6	83	1.6	84	61	83	1.6	0.120627
16To_08_54.FIN2	50.2	1.411	0.827	0.026	0.0996	0.0018	0.20021	612.5	14	611.9	11	582	64	611.9	11	0.0979592
16To_08_55.FIN2	184	2.305	0.084	0.0035	0.01281	0.00026	0.07405	81.8	3.3	82	1.7	84	79	82	1.7	0.244499
16To_08_56.FIN2	239	1.137	0.5766	0.016	0.07444	0.0012	0.0057348	461.7	10	462.8	7.5	430	52	462.8	7.5	0.23825
16To_08_57.FIN2	337	2.636	0.0787	0.0031	0.01182	0.00023	0.095859	77.1	2.8	75.8	1.5	101	68	75.8	1.5	1.68612
16To_08_58.FIN2	322	2.88	0.0936	0.0062	0.01322	0.00065	0.26014	90.7	5.8	84.7	4.1	210	140	84.7	4.1	6.61521
16To_08_59.FIN2	278	3.57	0.0959	0.0048	0.01318	0.00045	0.21712	92.7	4.4	84.4	2.9	265	90	84.4	2.9	8.95361
16To_08_61.FIN2	554	0.844	0.1989	0.0058	0.02915	0.00053	0.52883	184	4.9	185.2	3.3	179	53	185.2	3.3	0.652174
16To_08_62.FIN2	358.1	2.113	0.0605	0.0027	0.00934	0.00025	0.32248	59.6	2.6	59.9	1.6	15	73	59.9	1.6	0.503356
16To_08_63.FIN2	383	2.036	0.1062	0.0037	0.01561	0.00032	0.22531	102.4	3.4	99.8	2	151	61	99.8	2	2.53906
16To_08_64.FIN2	211.3	3.281	2.818	0.073	0.2407	0.0043	0.47363	1359.3	20	1390	22	1307	42	1307	42	6.35042
16To_08_65.FIN2	139.3	1.296	0.0707	0.0041	0.00974	0.00027	0.03756	69.1	3.9	62.5	1.7	250	110	62.5	1.7	9.55137
16To_08_67.FIN2	118.5	1.487	0.186	0.0072	0.02663	0.00061	0.15606	172.8	6.2	169.4	3.8	219	80	169.4	3.8	1.96759
16To_08_68.FIN2	53.3	1.115	13.22	0.36	0.5356	0.011	0.87725	2693	26	2769	47	2636	35	2636	35	5.04552
16To_08_69.FIN2	247	2.227	0.0986	0.0039	0.01486	0.00038	0.1959	95.4	3.6	95.1	2.4	77	79	95.1	2.4	0.314465
16To_08_70.FIN2	68.9	1.448	0.357	0.017	0.047	0.0017	0.40638	308	13	296.1	10	350	94	296.1	10	3.86364
16To_08_72.FIN2	105.1	1.927	0.1026	0.0053	0.01517	0.00035	0.32212	98.8	4.9	97	2.2	165	98	97	2.2	1.82186
16To_08_73.FIN2	131.1	0.849	4.459	0.12	0.3193	0.0063	0.6266	1724.4	22	1785	31	1652	39	1652	39	8.05085
16To_08_74.FIN2	166	3.083	0.0987	0.0042	0.01422	0.00033	0.23773	95.4	3.8	91	2.1	193	80	91	2.1	4.61216
16To_08_75.FIN2	224	3.15	0.1021	0.0041	0.01499	0.00036	0.34133	98.6	3.7	95.9	2.3	175	73	95.9	2.3	2.73834
16To_08_78.FIN2	76.6	2.352	0.0971	0.0055	0.01412	0.00034	0.05143	94.2	5	90.4	2.1	180	110	90.4	2.1	4.03397
16To_08_79.FIN2	43.1	1.97	6.74	0.19	0.3908	0.0091	0.56655	2079	25	2127	43	2045	43	2045	43	4.00978
16To_08_80.FIN2	24	1.357	0.733	0.039	0.0886	0.0035	0.2898	557	23	546	21	650	110	546	21	1.97487
16To_08_81.FIN2	170.7	3.478	0.0906	0.0037	0.01315	0.00026	0.017788	88.2	3.5	84.2	1.6	207	84	84.2	1.6	4.53515
16To_08_82.FIN2	387	3.75	0.0776	0.0027	0.01145	0.00023	0.18977	75.8	2.5	73.4	1.5	162	67	73.4	1.5	3.16623
16To_08_83.FIN2	324.6	8.03	0.0797	0.0038	0.0112	0.00037	0.19455	77.7	3.6	71.8	2.4	235	83	71.8	2.4	7.59331
16To_08_85.FIN2	128.7	2.322	0.0889	0.0046	0.01287	0.0003	0.26713	85.7	4.2	82.4	1.9	159	91	82.4	1.9	3.85064
16To_08_86.FIN2	160.4	1.591	15.54	0.4	0.5741	0.0098	0.68134	2850.5	25	2923	40	2782	33	2782	33	5.0683
16To_08_87.FIN2	345	1.961	0.1004	0.0035	0.01469	0.00035	0.29112	97	3.3	94	2.2	163	69	94	2.2	3.09278
16To_08_88.FIN2	262.4	3.542	0.0986	0.0042	0.01446	0.00036	0.28655	95.3	3.9	92.5	2.3	133	79	92.5	2.3	2.93809
16To_08_89.FIN2	120.1	1.767	5.034	0.13	0.3241	0.0052	0.6087	1827.7	21	1809	25	1825	36	1825	36	0.876712
16To_08_91.FIN2	163.7	2.195	0.1081	0.0044	0.0158	0.0003	0.30806	104	4	101.1	1.9	142	73	101.1	1.9	2.78846
16To_08_92.FIN2	1143	1.723	0.108	0.0056	0.01527	0.00064	0.40432	104	5.2	98.2	4	226	95	98.2	4	5.57692
16To_08_93.FIN2	495	1.03	0.0709	0.0027	0.01025	0.00023	0.21233	69.5	2.6	65.7	1.5	199	78	65.7	1.5	5.46763
16To_08_94.FIN2	160.1	1.866	0.0988	0.0044	0.01467	0.00033	0.16515	96	4.1	93.9	2.1	142	90	93.9	2.1	2.1875
16To_08_95.FIN2	205	3.113	0.2438	0.0087	0.03422	0.00072	0.29227	221.8	7.2	216.9	4.5	256	69	216.9	4.5	2.2092
16To_08_96.FIN2	475	0.862	0.1813	0.0055	0.02701	0.00053	0.44922	169.5	4.6	171.8	3.3	90	53	171.8	3.3	1.35693
16To_08_98.FIN2	103.8	1.081	2.124	0.06	0.1976	0.0038	0.54155	1156	19	1162	20	1129	46	1129	46	2.92294
16To_08_99.FIN2	333	1.968	0.1004	0.0035	0.01527	0.00028	0.19765	97	3.2	97.7	1.8	88	63	97.7	1.8	0.721649
16To_08_100.FIN2	970	3.22	0.0662	0.0036	0.00972	0.00053	0.63177	65	3.4	62.3	3.4	178	98	62.3	3.4	4.15385
16To_08_101.FIN2	103.2	1.312	0.324	0.013	0.0451	0.0014	0.0015424	284	9.7	284.4	8.8	261	75	284.4	8.8	0.140845
16To_08_102.FIN2	390.1	3.79	0.0714	0.0025	0.01071	0.00019	0.1006	70	2.4	68.7	1.2	113	64	68.7	1.2	1.85714
16To_08_103.FIN2	381	2.185	0.2458	0.007	0.03479	0.00064	0.2957	223.3	5.8	220.5	4	255	55	220.5	4	1.25392
16To_08_104.FIN2	441	0.994	0.1833	0.0053	0.02677	0.00046	0.34375	171.3	4.6	170.3	2.9	171	53	170.3	2.9	0.583771
16To_08_106.FIN2	275	1.473	0.2995	0.009	0.04188	0.00086	0.46434	266.5	7.1	264.4	5.3	267	57	264.4	5.3	0.787992
16To_08_107.FIN2	345	1.535	0.1003	0.0033	0.01507	0.00028	0.11333	96.9	3.1	96.4	1.8	129	66	96.4	1.8	0.515996
16To_08_108.FIN2	181	1.119	0.295	0.0098	0.04164	0.00089	0.28625	261.9	7.7	262.9	5.5	249	64	262.9	5.5	0.381825
16To_08_109.FIN2	185.3	2.537	3.193	0.084	0.2592	0.005	0.59264	1454.1	20	1485	26	1410	40	1410	40	5.31915
16To_08_110.FIN2	261.6	1.005	0.2004	0.0062	0.02895	0.00053	0.18868	185.3	5.2	184	3.3	177	59	184	3.3	0.701565
16To_08_111.FIN2	136	1.113	0.61	0.019	0.0808	0.0016	0.3875	485.1	12	500.7	9.5	432	57	500.7	9.5	3.21583
16To_08_112.FIN2	227	1.219	0.1149	0.0042	0.01713	0.00037	0.29062	110.3	3.9	109.5	2.4	140	67	109.5	2.4	0.725295
16To_08_113.FIN2	129	2.744	0.102	0.0042	0.01499	0.00032	0.28943	98.8	3.9	95.9	2	159	79	95.9	2	2.93522
16To_08_114.FIN2	389	2.65	0.0699	0.0023	0.010479	0.00018	0.042796	68.7	2.2	67.2	1.1	109	62	67.2	1.1	2.18341
16To_08_115.FIN2	371	1.157	0.1662	0.0052	0.02448	0.00044	0.44664	156.4	4.5	155.9	2.8	154	57	155.9	2.8	0.319693
16To_08_117.FIN2	66.3	1.251	0.1137	0.0073	0.01661	0.00041	0.0052244	108.8	6.6	106.2	2.6	180	130	106.2	2.6	2.38971
16To_08_118.FIN2	173.8	1.154	0.0839	0.0036	0.01272	0.00031	0.17955	81.9	3.3	81.4	2	145	86	81.4	2	0.610501
16To_08_119.FIN2	289	2.575	0.0864	0.0032	0.01298	0.00031	0.39536	84.1	3	83.1	2	124	68	83.1	2	1.18906
16To_08_120.FIN2	239	1.174	0.0807	0.0036	0.01215	0.00025	0.027735	78.6	3.4	77.8	1.6	64	70	77.8	1.6	1.01781
16To_08_122.FIN2	23.56	1.948	4.451	0.13	0.3163	0.0065	0.32365	1719	24	1770	32	1666	45	1666	45	6.2425
16To_08_123.FIN2	264	2.322	0.0684	0.0026	0.01027	0.00021	0.18617	67.1	2.4	65.83	1.3	99	71	65.83	1.3	1.8927
16To_08_124.FIN2	127	1.328	0.872	0.026	0.1032	0.0025	0.47348	636.3	14	633	14	624	57	633	14	0.518623
16To_08_125.FIN2	130.1	2.215	0.0969	0.0045	0.0135	0.00031	0.011662	93.6	4.2	86.4	2	247	89	86.4	2	7.69231
16To_08_126.FIN2	164	1.482	0.0849	0.0051	0.01291	0.00061	0.46466	82.5	4.7	82.7	3.9	150	110	82.7	3.9	0.242424
16To_08_127.FIN2	1032	1.905	0.1716	0.0062	0.02531	0.00072	0.49726	160.7	5.3	161.1	4.5	143	70	161.1	4.5	0.248911
16To_08_128.FIN2	35.22	2.082	0.1058	0.0076	0.01528	0.00046	0.094505	103	7	97.7	2.9	270	140	97.7	2.9	5.14563
16To_08_129.FIN2	609	1.053	0.0798	0.0033	0.01144	0.00027	0.6032	78	3.1	73.3	1.7	197	70	73.3	1.7	6.02564
16To_08_130.FIN2	283.8	1.234	0.0906	0.0034	0.01362	0.00025	0.30026	88	3.1	87.2	1.6	115	66	87.2	1.6	0.909091
16To_08_131.FIN2	110.9	3.73	0.1064	0.0064	0.01557	0.00068	0.37742	102.1	5.9	99.6	4.3	148	100	99.6	4.3	2.44858
16To_08_132.FIN2	215	1.497	0.1639	0.0056	0.02436	0.00054	0.32727	153.9	4.9	155.1	3.4	123	64	155.1	3.4	0.779727
16To_08_133.FIN2	219.7	3.38	4.898	0.15	0.3238	0.0075	0.54053	1804	24	1809	37	1777	46	1777	46	1.80079
16To_13_101.FIN2	118.5	1.908	0.0949	0.0042	0.0142	0.00033	0.31787	91.9	3.9	90.9	2.1	139	83	90.9	2.1	1.08814
16To_13_102.FIN2	81.7	2.472	0.0887	0.0048	0.01259	0.0003	0.012867	86.4	4.4	80.7	1.9	230	110	80.7	1.9	6.59722
16To_13_103.FIN2	553	3.055	0.2895	0.0078	0.04064	0.00071	0.38388	258.2	6.2	256.8	4.4	250	51	256.8	4.4	0.542215
16To_13_104.FIN2	119.4	1.8	0.0896	0.0041	0.01319	0.00028	0.15565	87.3	3.8	84.5	1.8	131	84	84.5	1.8	3.20733
16To_13_105.FIN2	263	1.001	0.0685	0.0029	0.01015	0.00021	0.20647	67.2	2.7	65.1	1.3	145	79	65.1	1.3	3.125
16To_13_106.FIN2	121.8	1.679	0.3359	0.011	0.04665	0.00094	0.34728	294	8.2	293.9	5.8	299	61	293.9	5.8	0.0340136
16To_13_107.FIN2	127	1.312	0.0972	0.0044	0.01486	0.00033	0.011023	94	4.1	95.1	2.1	64	88	95.1	2.1	1.17021
16To_13_108.FIN2	107.2	2.708	0.0774	0.0038	0.01173	0.00027	0.11588	75.5	3.6	75.2	1.7	98	94	75.2	1.7	0.397351
16To_13_109.FIN2	107.5	3.132	0.0887	0.0043	0.01367	0.00032	0.2296	86.1	4	87.5	2	80	87	87.5	2	1.62602
16To_13_110.FIN2	272	2.044	0.0797	0.0035	0.01234	0.00033	0.26176	77.7	3.2	79	2.1	62	81	79	2.1	1.6731
16To_13_111.FIN2	266	2.504	0.079	0.0035	0.01242	0.00027	0.099765	77.7	3.3	79.6	1.7	61	83	79.6	1.7	2.4453
16To_13_112.FIN2	990	1.397	0.1	0.0029	0.01503	0.00027	0.3406	96.9	2.7	96.2	1.7	127	53	96.2	1.7	0.722394
16To_13_113.FIN2	412	4.36	0.0977	0.0032	0.01457	0.00029	0.18961	94.6	2.9	93.2	1.8	156	66	93.2	1.8	1.47992
16To_13_114.FIN2	334.4	1.835	0.0907	0.0031	0.01333	0.00025	0.33503	88.5	2.9	85.3	1.6	188	64	85.3	1.6	3.61582
16To_13_115.FIN2	29.66	4.052	0.127	0.011	0.01555	0.0005	0.22468	120.1	10	99.4	3.2	520	170	DISC	DISC	17.2356
16To_13_116.FIN2	261	1.405	1.583	0.062	0.1533	0.0055	0.68116	970	25	919	31	1136	62	1136	62	19.1021	Rim
16To_13_116.FIN2	27.31	1.809	4.096	0.13	0.308	0.0084	0.60208	1652	27	1729	42	1605	49	1605	49	7.72586	Core
16To_13_118.FIN2	32.5	0.74	2.973	0.089	0.2408	0.0049	0.43539	1399	23	1390	25	1449	50	1449	50	4.07177
16To_13_120.FIN2	563	70.6	0.606	0.02	0.0792	0.002	0.64884	480.5	13	491.2	12	484	57	491.2	12	2.22685	Rim
16To_13_120.FIN2	160.4	1.703	2.013	0.068	0.1943	0.005	0.82896	1119	23	1144	27	1088	51	1088	51	5.14706	Core
16To_13_121.FIN2	318	3.2	0.0955	0.0036	0.01461	0.00038	0.28395	92.8	3.3	93.5	2.4	109	72	93.5	2.4	0.75431
16To_13_122.FIN2	87.8	2.045	0.0968	0.0051	0.0146	0.00035	0.25881	93.5	4.7	93.4	2.2	137	96	93.4	2.2	0.106952
16To_13_123.FIN2	288	1.357	3.65	0.14	0.2556	0.0075	0.82063	1556	30	1464	38	1706	44	1706	44	14.1852
16To_13_124.FIN2	427	1.429	0.1811	0.0051	0.02654	0.00046	0.21901	169	4.4	168.9	2.9	207	53	168.9	2.9	0.0591716
16To_13_125.FIN2	361	2.966	0.0803	0.0028	0.01231	0.00024	0.25294	78.3	2.6	78.8	1.5	104	65	78.8	1.5	0.63857
16To_13_126.FIN2	163.2	1.507	0.1046	0.0046	0.01553	0.0004	0.32093	101.9	4.4	99.3	2.5	210	82	99.3	2.5	2.55152
16To_13_127.FIN2	148.1	1.135	0.543	0.017	0.07248	0.0014	0.40998	440.9	11	451	8.5	416	58	451	8.5	2.29077
16To_13_128.FIN2	1013	1.243	0.0786	0.0026	0.01182	0.00022	0.31011	76.8	2.5	75.72	1.4	150	65	75.72	1.4	1.40625
16To_13_129.FIN2	182	1.19	0.0763	0.0036	0.01159	0.00025	0.032105	74.5	3.4	74.3	1.6	119	91	74.3	1.6	0.268456
16To_13_130.FIN2	226	1.372	0.2909	0.0083	0.04157	0.00071	0.38941	259.4	6.4	262.6	4.4	233	54	262.6	4.4	1.23362
GJ1_1.FIN2	387	44.97	0.8063	0.021	0.09801	0.0017	0.48236	599.9	12	602.7	9.8	584	46	602.7	9.8	0.466744
GJ1_2.FIN2	394	46.67	0.8081	0.021	0.09721	0.0016	0.47782	601.5	12	598	9.5	606	46	598	9.5	0.581879
GJ1_3.FIN2	382	45.3	0.8185	0.021	0.09787	0.0017	0.59523	606.8	12	601.8	10	628	44	601.8	10	0.823995
GJ1_4.FIN2	387.2	45.62	0.8139	0.021	0.09752	0.0017	0.56763	604.2	12	599.8	10	615	46	599.8	10	0.728236
GJ1_5.FIN2	382.6	46.1	0.8105	0.021	0.0981	0.0018	0.52329	603.2	12	602.9	10	603	47	602.9	10	0.0497347
GJ1_6.FIN2	380	45.23	0.8033	0.021	0.0979	0.0017	0.47108	599.2	12	601.9	10	593	47	601.9	10	0.450601
GJ1_7.FIN2	388	46.3	0.8042	0.021	0.097	0.0017	0.4485	598.8	12	596.5	10	602	48	596.5	10	0.384102
GJ1_8.FIN2	379.4	45.63	0.8149	0.022	0.0977	0.0017	0.53025	604.6	12	600.8	9.7	624	45	600.8	9.7	0.628515
GJ1_9.FIN2	374.4	46.4	0.8031	0.021	0.0971	0.0017	0.63296	598.1	12	597.5	10	608	45	597.5	10	0.100318
GJ1_10.FIN2	381	45.8	0.806	0.022	0.0979	0.0018	0.63905	599.7	12	602.3	10	601	46	602.3	10	0.43355
GJ1_11.FIN2	386.5	45.45	0.8184	0.021	0.0976	0.0017	0.45754	606.7	12	600.2	9.9	615	46	600.2	9.9	1.07137
GJ1_12.FIN2	388	45.1	0.8094	0.021	0.0974	0.0017	0.36965	601.6	12	599.3	10	608	48	599.3	10	0.382314
GJ1_13.FIN2	388.6	46.66	0.8	0.021	0.0979	0.0017	0.52697	596.4	12	602.5	9.8	575	47	602.5	9.8	1.0228
GJ1_14.FIN2	387	44.85	0.8133	0.021	0.09771	0.0017	0.41711	604.4	12	600.9	9.8	613	46	600.9	9.8	0.579087
GJ1_15.FIN2	378.8	45.85	0.8079	0.021	0.09737	0.0017	0.568	600.7	12	598.9	9.8	614	46	598.9	9.8	0.29965
GJ1_16.FIN2	379.4	46.22	0.8121	0.022	0.0979	0.0018	0.49804	603.6	12	602	10	621	45	602	10	0.265076
GJ1_17.FIN2	382.4	45.45	0.8108	0.021	0.09766	0.0016	0.48962	602.6	12	601.1	9.8	620	45	601.1	9.8	0.248921
GJ1_18.FIN2	386.3	45.97	0.8081	0.021	0.09725	0.0016	0.58004	601.5	12	598.2	9.5	610	45	598.2	9.5	0.548628
GJ1_19.FIN2	389.4	45.73	0.8012	0.021	0.09772	0.0017	0.50365	598.9	12	600.9	9.7	586	45	600.9	9.7	0.333946
GJ1_20.FIN2	385.7	45.11	0.8112	0.021	0.0972	0.0017	0.59085	602.7	12	597.9	10	608	47	597.9	10	0.796416
GJ1_21.FIN2	369	45.8	0.8221	0.021	0.099	0.0018	0.56348	608.8	12	608.7	10	614	45	608.7	10	0.0164258
GJ1_22.FIN2	389.8	45.9	0.8032	0.021	0.09723	0.0016	0.46432	598.7	12	598.1	9.6	602	45	598.1	9.6	0.100217
GJ1_23.FIN2	389.2	46.15	0.8156	0.022	0.09731	0.0017	0.4736	605.1	12	598.5	10	627	47	598.5	10	1.09073
GJ1_24.FIN2	383	45.58	0.807	0.022	0.0983	0.0018	0.6596	600	12	604.6	10	586	46	604.6	10	0.766667
GJ1_25.FIN2	378.8	45.66	0.8037	0.021	0.09694	0.0017	0.45968	598.5	12	596.4	9.9	599	47	596.4	9.9	0.350877
GJ1_26.FIN2	379.3	45.23	0.8112	0.021	0.0975	0.0017	0.51228	602.7	12	600.8	10	602	45	600.8	10	0.315248
GJ1_27.FIN2	391	45.77	0.8011	0.021	0.0981	0.0017	0.62929	598.5	12	603.2	10	565	46	603.2	10	0.785297
GJ1_28.FIN2	385	46.5	0.8143	0.022	0.0977	0.0018	0.57219	604.3	12	600.9	11	619	48	600.9	11	0.562634
GJ1_29.FIN2	382	44.99	0.8203	0.022	0.0976	0.0017	0.58679	608.3	12	600.5	10	662	44	600.5	10	1.28226
GJ1_30.FIN2	385	45.99	0.8083	0.022	0.0969	0.0018	0.55481	602.4	12	595.9	10	635	46	595.9	10	1.07902
GJ1_31.FIN2	387	44.65	0.8008	0.021	0.0977	0.0017	0.585	597.3	12	600.8	10	593	46	600.8	10	0.58597
GJ1_32.FIN2	373	46.01	0.822	0.022	0.0991	0.0018	0.55839	608.6	12	609.8	10	611	47	609.8	10	0.197174
GJ1_33.FIN2	395	46.55	0.8021	0.021	0.09668	0.0017	0.57991	598	12	594.8	9.7	612	46	594.8	9.7	0.535117
GJ1_34.FIN2	391	46.63	0.8013	0.021	0.0978	0.0018	0.56397	597.1	12	602	10	608	46	602	10	0.820633
GJ1_35.FIN2	372	45.33	0.8181	0.021	0.09713	0.0016	0.31803	607	12	597.5	9.4	666	47	597.5	9.4	1.56507
GJ1_36.FIN2	379	43.84	0.8123	0.022	0.09867	0.0017	0.52278	605.2	12	607.1	9.8	604	47	607.1	9.8	0.313946
GJ1_37.FIN2	389.2	47.12	0.8021	0.021	0.0972	0.0017	0.52829	598	12	597.9	10	619	46	597.9	10	0.0167224
GJ1_38.FIN2	384	45.98	0.8169	0.021	0.0978	0.0017	0.46562	605.9	12	601.7	10	645	47	601.7	10	0.693184
GJ1_39.FIN2	383	45.85	0.809	0.021	0.0974	0.0017	0.50177	601.9	12	599.1	9.8	619	46	599.1	9.8	0.465194
GJ1_40.FIN2	391	46.29	0.7958	0.021	0.09766	0.0017	0.57786	594.5	12	600.6	9.8	581	45	600.6	9.8	1.02607
GJ1_41.FIN2	382.3	45.35	0.819	0.021	0.09735	0.0017	0.47576	607.5	12	598.8	9.8	651	45	598.8	9.8	1.4321
GJ1_42.FIN2	387.6	45.13	0.8019	0.021	0.09741	0.0017	0.47954	597.5	12	599.1	9.7	589	46	599.1	9.7	0.267782
GJ1_43.FIN2	367	46.2	0.8215	0.021	0.09825	0.0017	0.47087	608.5	12	604.1	9.7	617	45	604.1	9.7	0.72309
GJ1_44.FIN2	385	45.42	0.8076	0.021	0.09773	0.0017	0.59008	600.7	12	601	9.9	586	47	601	9.9	0.0499417
GJ1_45.FIN2	387.4	45.41	0.8064	0.021	0.09725	0.0017	0.59968	600	12	598.2	9.7	601	45	598.2	9.7	0.3
GJ1_46.FIN2	383	46.37	0.811	0.021	0.09765	0.0017	0.49044	603.4	12	600.5	9.7	603	46	600.5	9.7	0.48061
GJ1_47.FIN2	381.1	45.93	0.8063	0.021	0.09755	0.0017	0.53597	600	12	599.9	9.9	598	46	599.9	9.9	0.0166667
GJ1_48.FIN2	389	45.53	0.8072	0.021	0.0973	0.0017	0.59786	600.5	12	598.5	10	599	46	598.5	10	0.333056
GJ1_49.FIN2	382	45.14	0.8104	0.021	0.0978	0.0017	0.55859	602.3	12	601.4	10	605	46	601.4	10	0.149427
GJ1_50.FIN2	381.6	46.06	0.8086	0.021	0.09796	0.0017	0.61394	601.2	12	602.9	10	586	45	602.9	10	0.282768
GJ1_51.FIN2	386	45.1	0.8171	0.021	0.09764	0.0017	0.35911	606.4	12	600.5	10	632	48	600.5	10	0.972955
GJ1_52.FIN2	390	46.44	0.8091	0.021	0.097	0.0017	0.46496	601.6	12	596.7	9.7	637	45	596.7	9.7	0.814495
GJ1_53.FIN2	381	46.02	0.8	0.022	0.09769	0.0017	0.55223	596	12	600.8	9.9	569	48	600.8	9.9	0.805369
GJ1_54.FIN2	386.5	45.14	0.8093	0.021	0.09829	0.0017	0.47635	601.6	12	604.8	9.9	572	47	604.8	9.9	0.531915
GJ1_55.FIN2	380	45.75	0.81	0.021	0.0971	0.0017	0.57979	602.4	12	597.3	9.9	597	46	597.3	9.9	0.846614
GJ1_56.FIN2	382	45.61	0.813	0.022	0.0981	0.0019	0.5814	604.4	12	602.8	11	616	46	602.8	11	0.264725
GJ1_57.FIN2	384	45.76	0.8146	0.021	0.09751	0.0017	0.54124	604.6	12	599.7	9.7	615	44	599.7	9.7	0.810453
GJ1_58.FIN2	385	46.11	0.8035	0.021	0.09757	0.0017	0.45677	598.8	12	600.1	10	586	46	600.1	10	0.217101
GJ1_59.FIN2	383	45.14	0.8109	0.021	0.09776	0.0017	0.53721	603	12	601.2	10	588	45	601.2	10	0.298507
GJ1_60.FIN2	394	46.14	0.796	0.021	0.0973	0.0018	0.65796	595	12	598.6	10	558	45	598.6	10	0.605042
GJ1_61.FIN2	377	45.42	0.8133	0.021	0.0975	0.0017	0.56788	603.9	12	599.4	10	615	46	599.4	10	0.745156
GJ1_62.FIN2	387	45.38	0.8181	0.021	0.09723	0.0016	0.56044	606.6	12	598.1	9.7	622	46	598.1	9.7	1.40125
GJ1_63.FIN2	369	46.47	0.815	0.021	0.09844	0.0016	0.46403	604.8	12	605.2	9.6	598	46	605.2	9.6	0.0661376
GJ1_64.FIN2	391.8	45.99	0.807	0.021	0.09763	0.0017	0.56206	600.8	12	600.4	9.9	601	45	600.4	9.9	0.0665779
GJ1_65.FIN2	387	45.25	0.7966	0.02	0.09731	0.0017	0.57575	595	12	598.5	9.8	579	45	598.5	9.8	0.588235
GJ1_66.FIN2	379.7	46.05	0.8132	0.021	0.09707	0.0016	0.42682	604.3	12	597.1	9.5	649	45	597.1	9.5	1.19146
GJ1_67.FIN2	384	45.13	0.8218	0.021	0.09837	0.0016	0.50505	609.1	12	604.8	9.6	657	46	604.8	9.6	0.70596
GJ1_68.FIN2	390	45.76	0.7955	0.021	0.09715	0.0016	0.4642	593.8	12	597.6	9.4	618	45	597.6	9.4	0.639946
GJ1_69.FIN2	380.3	45.07	0.8107	0.021	0.09799	0.0016	0.4821	602.5	12	602.6	9.4	615	45	602.6	9.4	0.0165975
GJ1_70.FIN2	384.4	46.84	0.8095	0.021	0.09738	0.0016	0.43474	601.9	12	599	9.4	619	46	599	9.4	0.481808
Pak1_1.FIN2	222.4	1.362	0.042	0.0018	0.00675	0.00015	0.18031	41.8	1.8	43.37	0.93	7	76	43.37	0.93	3.75598
Pak1_2.FIN2	266.7	1.314	0.0424	0.002	0.006701	0.00013	0.17268	42.1	1.9	43.05	0.84	63	84	43.05	0.84	2.25653
Pak1_3.FIN2	271.3	1.289	0.0445	0.0018	0.00692	0.00013	0.26864	44.2	1.8	44.45	0.86	57	75	44.45	0.86	0.565611
Pak1_4.FIN2	215.4	1.365	0.0423	0.0021	0.00651	0.00014	0.118	42.1	2	41.83	0.89	86	91	41.83	0.89	0.64133
Pak1_5.FIN2	188.1	1.32	0.0448	0.0022	0.00688	0.00015	0.0013488	44.5	2.1	44.21	0.93	70	89	44.21	0.93	0.651685
Pak1_6.FIN2	243.2	1.304	0.0412	0.0019	0.00667	0.00014	0.14923	40.9	1.9	42.93	0.9	-43	82	42.93	0.9	4.96333
Pak1_7.FIN2	259	1.315	0.044	0.002	0.0066	0.00013	0.15292	43.6	1.9	42.4	0.85	98	82	42.4	0.85	2.75229
Plesovice_1.FIN2	808	7.92	0.407	0.011	0.05596	0.001	0.4618	346.9	7.7	351.3	6	334	50	351.3	6	1.26838
Plesovice_2.FIN2	821	8.08	0.4102	0.011	0.05486	0.001	0.55877	349.1	7.8	344.2	6.4	360	49	344.2	6.4	1.40361
Plesovice_3.FIN2	805	8	0.4028	0.011	0.05559	0.001	0.60462	343.4	7.9	348.7	6.2	281	50	348.7	6.2	1.54339
Plesovice_4.FIN2	750	7.83	0.4127	0.011	0.05662	0.00099	0.54724	350.6	7.9	355	6.1	353	48	355	6.1	1.25499
Plesovice_5.FIN2	792	7.9	0.4042	0.01	0.05518	0.00096	0.44771	344.5	7.6	346.2	5.9	332	49	346.2	5.9	0.493469
Plesovice_6.FIN2	761	7.86	0.4062	0.011	0.05473	0.00093	0.50779	346.3	7.6	343.5	5.7	365	49	343.5	5.7	0.808548
Plesovice_7.FIN2	801	8.1	0.3875	0.01	0.05373	0.0009	0.42307	332.7	7.6	337.3	5.5	312	48	337.3	5.5	1.38263

## Sheet: 16TO04,05
Sample Name:				2σ Prop		2σ Prop		207/235	2σ Prop	206/238	2σ Prop	207/206	2σ Prop	Best age	2σ Prop
Grain #	[U] ppm	U/Th	207/235	error	206/238	error	RHO	Age Ma	error	Age (Ma)	error	Age (Ma)	error	(Ma)	error	% Discordance*	Rim/Core
16To_04_1.FIN2	133.1	1.178	0.0968	0.0065	0.01464	0.00044	0.083002	93.6	6	93.7	2.8	127	130	93.7	2.8	0.106838
16To_04_2.FIN2	183	3.7	2.004	0.11	0.1902	0.0054	0.59925	1117	38	1123	30	1122	110	1122	110	0.0891266
16To_04_4.FIN2	255	1.364	0.0928	0.0058	0.01432	0.00041	0.16495	90	5.3	91.7	2.6	89	120	91.7	2.6	1.88889
16To_04_5.FIN2	108.2	1.448	1.801	0.1	0.1783	0.0051	0.57854	1047	37	1057	28	1033	110	1033	110	2.32333
16To_04_6.FIN2	307	1.898	0.1071	0.0083	0.01614	0.00056	0.35971	103.1	7.6	103.2	3.5	140	150	103.2	3.5	0.0969932
16To_04_7.FIN2	156.7	0.956	0.166	0.011	0.0241	0.0007	0.29465	156.1	9.6	153.5	4.4	190	130	153.5	4.4	1.6656
16To_04_8.FIN2	19.53	1.237	4.44	0.27	0.2668	0.0084	0.59182	1720	51	1528	43	1938	100	1938	100	21.1558
16To_04_9.FIN2	197	1.815	2.119	0.12	0.1967	0.0054	0.59773	1157	38	1158	29	1153	100	1153	100	0.433651
16To_04_11.FIN2	234	0.987	1.807	0.1	0.1762	0.0047	0.41955	1046.9	36	1045.8	26	1043	100	1043	100	0.268456
16To_04_13.FIN2	339	1.783	2.875	0.16	0.2365	0.0062	0.44575	1374.5	42	1368.4	33	1377	100	1377	100	0.624546
16To_04_14.FIN2	161	0.968	0.0983	0.0069	0.01424	0.00045	0.17791	95.4	6.3	91.1	2.9	198	140	91.1	2.9	4.50734
16To_04_15.FIN2	147.8	1.454	0.1067	0.0087	0.01409	0.00045	0.37289	102.5	7.9	90.2	2.8	340	160	90.2	2.8	12
16To_04_16.FIN2	132.8	1.353	1.957	0.11	0.18	0.0049	0.51212	1102.8	36	1066.6	27	1153	100	1153	100	7.4935
16To_04_17.FIN2	390.1	2.819	1.144	0.067	0.1257	0.0038	0.6622	773	32	763	22	809	110	763	22	1.29366
16To_04_18.FIN2	174.6	1.301	0.0828	0.0061	0.0128	0.00042	0.014375	80.6	5.7	82	2.7	90	140	82	2.7	1.73697
16To_04_19.FIN2	389	1.262	0.1042	0.0064	0.01535	0.00043	0.20632	100.8	5.8	98.2	2.7	158	120	98.2	2.7	2.57937
16To_04_20.FIN2	53.3	0.41	0.123	0.015	0.01541	0.00075	0.11978	119	14	98.5	4.8	570	240	DISC	DISC	17.2269
16To_04_21.FIN2	1206	12.14	4.551	0.25	0.3062	0.0085	0.68348	1740	47	1721	42	1732	95	1732	95	0.635104
16To_04_22.FIN2	142	2.75	6.414	0.36	0.3713	0.01	0.64154	2033	49	2034	49	2008	94	2008	94	1.29482
16To_04_23.FIN2	472	0.856	0.1748	0.01	0.02621	0.00074	0.27198	163.4	8.7	166.8	4.7	75	110	166.8	4.7	2.08078
16To_04_24.FIN2	317	1.126	0.2842	0.016	0.04036	0.0011	0.25008	254.4	13	255.1	6.8	212	120	255.1	6.8	0.275157
16To_04_25.FIN2	278.9	0.888	0.2907	0.017	0.0407	0.0011	0.27235	258.7	13	257.1	7.1	224	120	257.1	7.1	0.618477
16To_04_26.FIN2	134	2.056	0.257	0.017	0.03576	0.001	0.13592	231.2	14	226.5	6.5	229	130	226.5	6.5	2.03287
16To_04_27.FIN2	627	1.468	0.0829	0.005	0.0121	0.00034	0.22631	80.8	4.7	77.55	2.2	144	120	77.55	2.2	4.02228
16To_04_28.FIN2	66.5	0.485	3.005	0.17	0.2408	0.0067	0.3816	1408	43	1390	35	1387	100	1387	100	0.216294
16To_04_31.FIN2	430	1.163	0.1093	0.0067	0.01509	0.00042	0.29517	105.8	6.2	96.6	2.7	253	130	96.6	2.7	8.69565
16To_04_34.FIN2	243	1.466	0.0972	0.0061	0.01426	0.00042	0.20685	94.1	5.7	91.3	2.7	150	120	91.3	2.7	2.97556
16To_04_35.FIN2	44.1	1.593	1.828	0.11	0.177	0.0054	0.57246	1057	38	1050	30	1050	110	1050	110	0
16To_04_36.FIN2	224	0.952	0.0698	0.0048	0.01124	0.00033	0.067426	68.4	4.5	72.1	2.1	-45	120	72.1	2.1	5.40936
16To_04_38.FIN2	616	1.271	0.0829	0.0053	0.01199	0.00034	0.28214	81.1	4.9	76.83	2.2	161	130	76.83	2.2	5.2651
16To_04_39.FIN2	385	2.059	0.491	0.036	0.0634	0.0028	0.4223	404	25	396	17	422	150	396	17	1.9802	Rim
16To_04_39.FIN2	46.1	2.938	1.554	0.11	0.1587	0.0064	0.53103	951	47	949	36	950	140	950	140	0.105263	Core
16To_04_40.FIN2	474	2.51	0.0937	0.0057	0.0138	0.00043	0.46844	91.1	5.2	88.3	2.7	136	120	88.3	2.7	3.07355
16To_04_41.FIN2	305.8	1.785	0.0862	0.0056	0.01251	0.00036	0.090648	84.7	5.3	80.2	2.3	162	130	80.2	2.3	5.31287
16To_04_42.FIN2	456	2.018	0.0851	0.0052	0.01245	0.00037	0.2033	82.9	4.9	79.8	2.3	118	120	79.8	2.3	3.73945
16To_04_43.FIN2	141.8	1.008	0.1102	0.0078	0.01637	0.00048	0.22829	105.8	7.1	104.7	3.1	132	130	104.7	3.1	1.0397
16To_04_44.FIN2	278	1.018	0.0754	0.0047	0.01159	0.00035	0.16553	73.7	4.4	74.3	2.2	85	120	74.3	2.2	0.814111
16To_04_45.FIN2	188.6	1.039	0.0893	0.0062	0.01332	0.00041	0.12424	86.6	5.8	85.3	2.6	94	130	85.3	2.6	1.50115
16To_04_46.FIN2	168.7	0.826	0.0783	0.0058	0.01139	0.00036	0.028702	76.4	5.4	73	2.3	180	150	73	2.3	4.45026
16To_04_47.FIN2	291.9	1.303	0.1129	0.0071	0.01665	0.00048	0.19761	108.4	6.5	106.5	3.1	152	130	106.5	3.1	1.75277
16To_04_48.FIN2	334.4	1.554	0.0851	0.0054	0.01297	0.00038	0.12091	82.8	5	83.1	2.4	80	120	83.1	2.4	0.362319
16To_04_49.FIN2	100.6	1.434	0.601	0.036	0.0759	0.0022	0.26207	477	22	471.7	13	475	130	471.7	13	1.11111
16To_04_50.FIN2	373	0.507	0.083	0.0055	0.01229	0.0004	0.4292	80.8	5.1	78.7	2.5	129	130	78.7	2.5	2.59901
16To_04_51.FIN2	164.1	1.138	0.0935	0.0073	0.01306	0.00052	0.10242	90.6	6.8	83.6	3.3	290	160	83.6	3.3	7.72627
16To_04_52.FIN2	73.4	1.12	0.0961	0.0088	0.01427	0.0005	0.036665	93.3	8	91.3	3.2	200	160	91.3	3.2	2.14362
16To_04_53.FIN2	234.3	1.461	0.1099	0.0077	0.01479	0.00053	0.38435	105.6	7	94.6	3.4	317	140	94.6	3.4	10.4167
16To_04_56.FIN2	306	1.221	0.0875	0.0053	0.01322	0.00038	0.051642	85.1	5	84.7	2.4	109	120	84.7	2.4	0.470035
16To_04_57.FIN2	58.8	1.78	0.091	0.016	0.01397	0.00097	0.32518	88	15	89.4	6.2	110	340	89.4	6.2	1.59091	Rim
16To_04_57.FIN2	276	5.47	4.15	0.56	0.148	0.016	0.98856	1610	110	878	88	2839	96	DISC	DISC	69.0736	Core
16To_04_58.FIN2	855	15.1	4.416	0.24	0.2973	0.008	0.69973	1714.6	46	1678	40	1752	95	1752	95	4.22374
16To_04_59.FIN2	419	1.134	0.1074	0.0063	0.01614	0.00046	0.19598	103.7	5.7	103.2	2.9	98	120	103.2	2.9	0.48216
16To_04_60.FIN2	237	2.849	0.562	0.032	0.072	0.0022	0.42582	452.1	21	447.9	13	488	120	447.9	13	0.928998
16To_04_61.FIN2	134	1.491	0.0864	0.0066	0.01302	0.00042	0.14812	83.8	6.2	83.4	2.7	100	140	83.4	2.7	0.477327
16To_04_62.FIN2	77.7	0.429	0.235	0.017	0.03267	0.0011	0.04126	214.1	14	207.2	6.8	290	150	207.2	6.8	3.22279
16To_04_63.FIN2	532	1.321	0.4999	0.029	0.06451	0.0018	0.20958	411.2	19	403	11	451	120	403	11	1.99416
16To_04_64.FIN2	153.5	1.175	0.0915	0.0066	0.01346	0.00045	0.16556	89	6	86.2	2.9	118	130	86.2	2.9	3.14607
16To_04_65.FIN2	146.2	1.225	0.0797	0.0064	0.01162	0.00037	0.091144	77.5	6	74.5	2.4	130	140	74.5	2.4	3.87097
16To_04_66.FIN2	481	1.171	0.109	0.0086	0.01387	0.00047	0.25594	103.7	7.4	88.8	3	410	150	88.8	3	14.3684
16To_04_67.FIN2	258.7	1.963	0.3053	0.018	0.04195	0.0012	0.31311	271.3	14	264.9	7.3	320	130	264.9	7.3	2.35901
16To_04_68.FIN2	178.3	1.055	0.0784	0.0054	0.01163	0.00035	0.036017	76.5	5.1	74.5	2.2	157	140	74.5	2.2	2.61438
16To_04_69.FIN2	623	1.517	0.0835	0.0055	0.01174	0.00035	0.25062	81.3	5.1	75.3	2.2	249	130	75.3	2.2	7.38007
16To_04_70.FIN2	284.9	1.717	0.0872	0.0059	0.01311	0.00038	0.18978	84.7	5.5	84	2.4	114	130	84	2.4	0.826446
16To_04_72.FIN2	106	0.928	0.0812	0.0082	0.01177	0.00041	0.11529	78.9	7.6	75.4	2.6	210	180	75.4	2.6	4.43599
16To_04_74.FIN2	455	1.237	0.686	0.04	0.085	0.0026	0.61638	529.5	24	525.7	16	525	120	525.7	16	0.717658
16To_04_75.FIN2	101.6	1.775	2.107	0.12	0.1886	0.0051	0.24948	1151	38	1114.6	28	1192	110	1192	110	6.49329
16To_04_76.FIN2	587	5.48	3.949	0.22	0.2636	0.0082	0.80756	1623	45	1506	42	1737	100	1737	100	13.2988
16To_04_77.FIN2	274.3	0.927	0.3911	0.022	0.05229	0.0014	0.13775	334.8	16	328.5	8.7	336	120	328.5	8.7	1.88172
16To_04_79.FIN2	65.7	2.08	1.746	0.1	0.1666	0.0047	0.35289	1023	38	994	25	1053	110	1053	110	5.60304
16To_04_80.FIN2	254	3.52	4.312	0.24	0.2981	0.0082	0.66431	1694	46	1681	41	1686	96	1686	96	0.29656
16To_04_81.FIN2	204.4	1.245	0.0864	0.0059	0.01273	0.00037	0.12133	84.6	5.4	81.5	2.4	104	130	81.5	2.4	3.6643
16To_04_82.FIN2	239.9	1.141	0.0811	0.0056	0.01174	0.00041	0.3585	79.1	5.2	75.3	2.6	185	140	75.3	2.6	4.80405
16To_04_83.FIN2	70.1	3.8	3.35	0.21	0.2442	0.0083	0.80718	1490	50	1407	43	1597	100	1597	100	11.8973
16To_04_84.FIN2	156.5	1.157	3.245	0.18	0.2553	0.0073	0.64386	1466	43	1467	38	1453	97	1453	97	0.963524
16To_04_85.FIN2	212.7	1.766	0.0614	0.0045	0.00942	0.00029	0.073954	60.3	4.3	60.5	1.8	66	140	60.5	1.8	0.331675
16To_04_86.FIN2	151	2.83	0.0978	0.0096	0.01317	0.00056	0.12075	94.5	8.9	84.3	3.6	380	220	84.3	3.6	10.7937
16To_04_87.FIN2	654	1.851	0.1047	0.0063	0.01508	0.00044	0.13058	101	5.8	96.5	2.8	175	120	96.5	2.8	4.45545
16To_04_88.FIN2	193	1.775	0.0697	0.0052	0.01013	0.00032	0.012229	68.2	4.9	64.9	2.1	160	140	64.9	2.1	4.83871
16To_04_89.FIN2	243	1.675	0.0983	0.0068	0.01458	0.00046	0.049901	95	6.2	93.3	2.9	120	130	93.3	2.9	1.78947
16To_04_90.FIN2	25.4	0.76	3.07	0.21	0.2072	0.0087	0.66095	1420	52	1211	47	1734	110	DISC	DISC	30.1615
16To_04_91.FIN2	309	1.289	2.184	0.12	0.2004	0.0057	0.70553	1174.6	39	1178	31	1130	100	1130	100	4.24779
16To_04_92.FIN2	130.9	2.455	0.0908	0.0068	0.01289	0.00042	0.14563	87.9	6.3	82.6	2.6	210	150	82.6	2.6	6.02958
16To_04_93.FIN2	150.7	1.057	0.611	0.037	0.0773	0.0024	0.48491	483	23	480.7	15	486	130	480.7	15	0.47619
16To_04_94.FIN2	437	11.83	3.021	0.17	0.2414	0.0065	0.6424	1411.2	42	1395	34	1408	99	1408	99	0.923295
16To_04_95.FIN2	252	3.93	4.203	0.23	0.2987	0.0083	0.62246	1673.9	45	1686	42	1652	96	1652	96	2.05811
16To_04_96.FIN2	625	6.69	3.223	0.18	0.2517	0.0071	0.67098	1465	45	1447	37	1468	100	1468	100	1.43052
16To_04_97.FIN2	317	1.933	0.0912	0.0064	0.01357	0.00045	0.32881	88.4	5.9	86.9	2.9	129	130	86.9	2.9	1.69683	Rim
16To_04_97.FIN2	250.8	2.382	0.181	0.016	0.0255	0.0012	0.39037	169	14	162.3	7.8	240	170	162.3	7.8	3.9645	Core
16To_04_98.FIN2	242	0.923	0.0962	0.0078	0.01209	0.00047	0.16067	93.1	7.2	77.4	3	470	190	DISC	DISC	16.8636
16To_04_99.FIN2	443	1.164	0.203	0.013	0.02863	0.00092	0.40007	187.4	11	182	5.7	209	130	182	5.7	2.88154	Rim
16To_04_99.FIN2	100.6	0.686	2.76	0.2	0.2234	0.01	0.79297	1339	54	1299	54	1389	110	1389	110	6.47948	Core
16To_04_100.FIN2	1370	2.124	0.3069	0.019	0.04131	0.0014	0.63508	271.4	14	260.9	8.7	338	130	260.9	8.7	3.86883
16To_04_101.FIN2	8.42	0.809	2.43	0.18	0.21	0.0084	0.16684	1235	54	1230	44	1230	150	1230	150	0
16To_04_102.FIN2	365	2.094	0.2632	0.016	0.03686	0.0012	0.31761	236.8	13	233.3	7.7	241	130	233.3	7.7	1.47804
16To_04_103.FIN2	669	1.345	0.164	0.012	0.02333	0.00076	0.35211	154	10	148.7	4.8	241	140	148.7	4.8	3.44156
16To_04_104.FIN2	222	1.488	3.77	0.23	0.2809	0.01	0.73947	1578	49	1593	51	1542	110	1542	110	3.30739
16To_04_105.FIN2	603	3.008	0.0651	0.004	0.00983	0.00028	0.33457	63.9	3.8	63.03	1.8	82	120	63.03	1.8	1.3615
16To_04_106.FIN2	385	2.547	0.1139	0.0071	0.01666	0.00054	0.33557	109.4	6.5	106.5	3.4	172	130	106.5	3.4	2.65082
16To_04_107.FIN2	254	2.135	0.1165	0.0078	0.01698	0.00056	0.4831	112.1	7	108.5	3.6	175	130	108.5	3.6	3.21142
16To_04_108.FIN2	229.7	0.828	0.272	0.017	0.0383	0.0011	0.14532	243.8	13	242.3	6.7	230	130	242.3	6.7	0.615258
16To_04_109.FIN2	419.6	1.909	0.0874	0.0053	0.0133	0.00038	0.082079	85	5	85.2	2.4	75	120	85.2	2.4	0.235294
16To_04_110.FIN2	250.3	1.134	0.0642	0.0044	0.00983	0.00031	0.045475	63	4.2	63.1	2	110	130	63.1	2	0.15873
16To_04_111.FIN2	317	1.367	0.0904	0.0058	0.01284	0.00039	0.016655	87.7	5.4	82.2	2.5	225	130	82.2	2.5	6.27138
16To_04_112.FIN2	584	1.375	0.0769	0.0046	0.01164	0.00032	0.077197	75.2	4.3	74.6	2.1	80	110	74.6	2.1	0.797872
16To_04_113.FIN2	1238	32.91	4.456	0.25	0.3093	0.0086	0.78825	1721	46	1736	42	1676	95	1676	95	3.57995
16To_04_114.FIN2	118.8	2.141	0.0938	0.0087	0.01195	0.0004	0.052501	90.4	8	76.5	2.6	360	170	DISC	DISC	15.3761
16To_04_115.FIN2	395	0.962	0.0996	0.0065	0.01478	0.00045	0.23662	96.3	6	94.6	2.8	104	130	94.6	2.8	1.76532
16To_04_116.FIN2	742	31	4.288	0.24	0.3005	0.0088	0.67631	1690	46	1692	44	1656	95	1656	95	2.17391
16To_04_117.FIN2	468	1.878	0.1103	0.007	0.01562	0.00044	0.090832	106.1	6.4	99.9	2.8	202	110	99.9	2.8	5.84354
16To_04_118.FIN2	178.6	0.747	0.877	0.05	0.1025	0.0029	0.40745	639	27	629	17	665	120	629	17	1.56495
16To_04_119.FIN2	39.9	0.849	1.576	0.11	0.1593	0.0077	0.62197	961	41	951	42	966	130	966	130	1.5528
16To_04_121.FIN2	118	0.708	12.72	0.78	0.524	0.019	0.92073	2650	60	2708	81	2591	88	2591	88	4.51563
16To_04_122.FIN2	204	1.809	0.0723	0.0058	0.01011	0.00033	0.1511	70.6	5.5	64.8	2.1	220	160	64.8	2.1	8.2153
16To_04_123.FIN2	507	0.712	0.1815	0.011	0.02601	0.00081	0.3864	169.2	9.4	165.5	5.1	195	130	165.5	5.1	2.18676
16To_04_126.FIN2	245	2.227	0.0934	0.0071	0.01223	0.00042	0.31944	90.5	6.6	78.3	2.7	390	160	78.3	2.7	13.4807
16To_04_127.FIN2	497	0.845	0.1759	0.01	0.02587	0.00072	0.32993	164.7	8.5	164.6	4.5	136	120	164.6	4.5	0.0607165
16To_04_128.FIN2	537	0.81	0.0895	0.0055	0.0121	0.00044	0.3121	86.9	5.2	77.5	2.8	313	130	77.5	2.8	10.817
16To_04_129.FIN2	90.4	2.014	2.18	0.12	0.1941	0.0053	0.33573	1174	39	1143	29	1205	110	1205	110	5.14523
16To_04_130.FIN2	237.8	0.989	1.627	0.091	0.1609	0.0046	0.61983	980.1	35	962	25	996	110	996	110	3.41365
16To_04_131.FIN2	669	14.1	0.814	0.046	0.0958	0.0028	0.50182	604.2	26	589.8	16	631	110	589.8	16	2.38332
16To_04_132.FIN2	318	2.007	0.0806	0.0052	0.01242	0.00039	0.29917	79.1	4.9	79.6	2.5	67	120	79.6	2.5	0.632111
16To_04_133.FIN2	959	1.544	0.1053	0.0065	0.01467	0.00057	0.52682	101.9	6.1	93.8	3.6	290	130	93.8	3.6	7.94897
16To_04_134.FIN2	678	1.173	0.0851	0.0052	0.01264	0.00036	0.23489	82.9	4.9	80.9	2.3	106	120	80.9	2.3	2.41255
16To_04_135.FIN2	164	1.81	0.088	0.012	0.01341	0.001	0.47147	85.5	11	85.8	6.4	170	230	85.8	6.4	0.350877	Rim
16To_04_135.FIN2	113.2	2.372	1.945	0.12	0.1698	0.0061	0.65176	1094	40	1010	34	1241	110	1241	110	18.614	Core
16To_04_136.FIN2	894	5.3	3.979	0.22	0.2815	0.0082	0.7077	1629	46	1598	41	1642	97	1642	97	2.67966
16To_04_137.FIN2	182	1.112	0.1139	0.0091	0.01529	0.00074	0.30219	108.9	8.3	97.8	4.7	340	160	97.8	4.7	10.1928
16To_04_138.FIN2	453	2.069	0.0864	0.0052	0.01235	0.00036	0.14469	84	4.9	79.1	2.3	218	120	79.1	2.3	5.83333
16To_04_139.FIN2	590	1.976	0.0785	0.0049	0.01193	0.00035	0.18623	77.1	4.6	76.4	2.2	65	120	76.4	2.2	0.907912
16To_04_140.FIN2	299	1.866	0.083	0.0064	0.01195	0.0006	0.61494	80.8	6	76.6	3.8	199	140	76.6	3.8	5.19802	Rim
16To_04_140.FIN2	361	2.722	2.23	0.22	0.168	0.014	0.97064	1182	70	999	77	1522	100	DISC	DISC	34.3627	Core
16To_05_1.FIN2	63.1	0.458	0.177	0.015	0.02366	0.00082	0.0096576	164	13	151.1	5.1	370	170	151.1	5.1	7.86585
16To_05_2.FIN2	2230	0.972	0.0745	0.0043	0.01072	0.00031	0.47696	72.9	4.1	68.76	2	167	120	68.76	2	5.67901
16To_05_3.FIN2	390.2	3.05	0.1894	0.011	0.027	0.00074	0.25989	176.3	9.3	171.8	4.7	211	120	171.8	4.7	2.55247
16To_05_4.FIN2	282	1.57	0.0911	0.006	0.01261	0.00038	0.17976	88.3	5.6	80.8	2.4	256	130	80.8	2.4	8.49377
16To_05_5.FIN2	1070	1.288	0.1818	0.01	0.02597	0.00074	0.35552	169.4	9	165.2	4.7	188	120	165.2	4.7	2.47934
16To_05_7.FIN2	160.1	0.815	0.0985	0.0069	0.01486	0.00046	0.040125	95.5	6.4	95.1	2.9	115	130	95.1	2.9	0.418848
16To_05_9.FIN2	141.8	0.736	0.116	0.012	0.01625	0.0009	0.023389	110.7	11	103.9	5.7	250	180	103.9	5.7	6.14273
16To_05_10.FIN2	506	1.485	2.11	0.19	0.144	0.011	0.96668	1124	63	861	64	1703	100	DISC	DISC	49.4422
16To_05_11.FIN2	156.7	1.191	0.0792	0.0056	0.01192	0.00038	0.13277	77.5	5.2	76.4	2.4	88	130	76.4	2.4	1.41935
16To_05_12.FIN2	780	0.941	0.1034	0.0061	0.01551	0.00045	0.36374	99.8	5.6	99.2	2.9	77	110	99.2	2.9	0.601202
16To_05_13.FIN2	345	0.644	0.0644	0.0042	0.0097	0.00029	0.28823	63.2	4	62.2	1.9	81	120	62.2	1.9	1.58228
16To_05_14.FIN2	314	1.459	0.0957	0.0066	0.01343	0.00047	0.11155	92.7	6.1	86	3	219	140	86	3	7.22762
16To_05_15.FIN2	676	2.66	0.4602	0.027	0.0604	0.0018	0.54882	383.8	18	378	11	392	120	378	11	1.5112
16To_05_16.FIN2	133.7	1.317	0.0892	0.0075	0.01319	0.00054	0.10059	86.4	7	84.4	3.4	100	160	84.4	3.4	2.31481
16To_05_17.FIN2	171.9	1.57	0.0769	0.0065	0.01095	0.00041	0.24738	75	6.1	70.2	2.6	200	160	70.2	2.6	6.4
16To_05_18.FIN2	396	1.777	0.0914	0.0061	0.01353	0.00045	0.25563	89	5.7	86.7	2.8	114	130	86.7	2.8	2.58427
16To_05_19.FIN2	30.6	0.307	14.77	0.85	0.5146	0.016	0.61349	2795	54	2680	67	2868	87	2868	87	6.55509
16To_05_20.FIN2	439	0.954	0.2055	0.012	0.02944	0.00084	0.16779	190.5	9.9	187	5.2	204	120	187	5.2	1.83727
16To_05_21.FIN2	378	3.159	1.879	0.11	0.1814	0.005	0.70074	1073.5	37	1074	28	1039	110	1039	110	3.36862
16To_05_22.FIN2	307.2	1.746	0.0874	0.0056	0.01287	0.00037	0.24233	84.9	5.3	82.4	2.4	120	120	82.4	2.4	2.94464
16To_05_23.FIN2	161.1	1.77	0.0852	0.0062	0.0127	0.0004	0.075464	83.2	5.9	81.3	2.5	104	130	81.3	2.5	2.28365
16To_05_24.FIN2	51.6	0.282	7.95	0.46	0.3927	0.012	0.68773	2223	53	2133	55	2263	92	2263	92	5.74459
16To_05_25.FIN2	539	1.178	0.298	0.019	0.04153	0.0014	0.6309	264.7	15	262.2	9	266	130	262.2	9	0.944465
16To_05_26.FIN2	564	1.486	0.2724	0.016	0.03827	0.0012	0.48826	244.2	13	242.1	7.3	184	120	242.1	7.3	0.859951
16To_05_27.FIN2	433	2.42	0.5933	0.033	0.07486	0.002	0.34634	472.5	21	465.3	12	452	120	465.3	12	1.52381
16To_05_29.FIN2	282	2.252	0.0894	0.0058	0.01347	0.00039	0.091167	86.8	5.4	86.2	2.5	68	120	86.2	2.5	0.691244
16To_05_30.FIN2	310	5.24	3.86	0.21	0.2778	0.0077	0.62813	1605.7	44	1581	38	1606	99	1606	99	1.55666
16To_05_31.FIN2	382	2.073	0.0844	0.0052	0.01239	0.00036	0.013543	82.2	4.9	79.4	2.3	130	120	79.4	2.3	3.40633
16To_05_32.FIN2	455	3.15	0.0702	0.0043	0.01049	0.00029	0.27302	68.8	4.1	67.27	1.9	86	120	67.27	1.9	2.22384
16To_05_33.FIN2	252.9	0.721	0.0705	0.0047	0.0104	0.00031	0.079102	69.3	4.4	66.7	2	147	130	66.7	2	3.7518
16To_05_34.FIN2	470	2.7	0.0889	0.0054	0.01351	0.00038	0.20877	86.6	5.1	86.5	2.4	61	110	86.5	2.4	0.115473
16To_05_35.FIN2	77	1.257	3.047	0.18	0.2372	0.0089	0.64239	1415	45	1369	46	1483	110	1483	110	7.68712
16To_05_36.FIN2	236	1.862	0.0897	0.0068	0.01357	0.00051	0.058067	86.9	6.3	86.9	3.2	70	140	86.9	3.2	0
16To_05_37.FIN2	387	3.72	2.367	0.13	0.2119	0.006	0.71663	1232.8	40	1239	32	1205	110	1205	110	2.82158
16To_05_38.FIN2	270	1.714	1.172	0.071	0.125	0.0045	0.55173	787	34	759	26	877	120	759	26	3.55781
16To_05_39.FIN2	297.5	1.25	0.0998	0.0062	0.01448	0.00042	0.22532	96.4	5.8	92.7	2.7	182	120	92.7	2.7	3.83817
16To_05_40.FIN2	264	1.71	9.83	0.79	0.354	0.021	0.90369	2417	77	1952	100	2823	91	DISC	DISC	30.8537
16To_05_41.FIN2	171.6	0.571	0.077	0.0065	0.00991	0.00037	0.10368	75.1	6.1	63.6	2.4	440	170	DISC	DISC	15.3129
16To_05_42.FIN2	106.6	0.889	0.0852	0.0074	0.01074	0.00039	0.04482	83.4	6.7	68.8	2.5	460	170	DISC	DISC	17.506
16To_05_43.FIN2	36.4	0.815	1.892	0.12	0.1775	0.0054	0.38506	1074	43	1053	29	1144	130	1144	130	7.95455
16To_05_44.FIN2	1320	1.287	0.3277	0.019	0.04342	0.0013	0.22588	287.7	14	274	8.3	424	120	274	8.3	4.7619
16To_05_45.FIN2	192.8	1.278	0.1963	0.013	0.02912	0.00085	0.26043	181.9	11	185	5.3	168	130	185	5.3	1.70423
16To_05_46.FIN2	102.6	1.178	0.0803	0.0074	0.01154	0.00045	0.16966	78.1	6.9	73.9	2.9	250	180	73.9	2.9	5.37772
16To_05_47.FIN2	143.8	2.1	0.109	0.012	0.0157	0.0012	0.45043	104.4	11	100.3	7.5	280	210	100.3	7.5	3.9272
16To_05_48.FIN2	193.1	1.267	0.0997	0.0088	0.01484	0.00056	0.082786	97.2	7.9	94.9	3.5	180	180	94.9	3.5	2.36626
16To_05_49.FIN2	386	2	0.1049	0.0062	0.01564	0.00045	0.13155	101.2	5.7	100	2.9	164	120	100	2.9	1.18577
16To_05_50.FIN2	234	1.511	0.1005	0.007	0.01487	0.00049	0.3207	97.4	6.6	95.1	3.1	182	130	95.1	3.1	2.3614
16To_05_51.FIN2	256.8	2.8	0.1001	0.0066	0.01493	0.00045	0.19364	97	6.1	95.5	2.9	176	120	95.5	2.9	1.54639
16To_05_52.FIN2	274	1.65	0.0956	0.0066	0.01424	0.00056	0.42584	92.4	6.1	91.1	3.6	216	130	91.1	3.6	1.40693
16To_05_53.FIN2	167	2.442	1.439	0.087	0.1438	0.0049	0.74354	909	37	865	27	1033	110	1033	110	16.2633
16To_05_54.FIN2	85.4	2.039	0.1524	0.011	0.02249	0.00071	0.049272	144.6	9.8	143.4	4.5	200	140	143.4	4.5	0.829876
16To_05_55.FIN2	578	1.008	0.474	0.029	0.0609	0.0019	0.56562	393	20	380.9	11	499	130	380.9	11	3.07888
16To_05_56.FIN2	171.7	0.993	3.107	0.18	0.2564	0.0078	0.67081	1432	44	1471	40	1425	100	1425	100	3.22807
16To_05_57.FIN2	119.2	1.613	0.1204	0.01	0.01618	0.00074	0.19835	114.7	9.1	103.4	4.7	420	160	103.4	4.7	9.85179
16To_05_58.FIN2	396.1	1.085	0.1587	0.0098	0.0231	0.00068	0.40454	149.3	8.6	147.2	4.3	225	120	147.2	4.3	1.40656
16To_05_59.FIN2	365	1.476	0.3044	0.018	0.04285	0.0013	0.43988	270.2	14	270.4	7.9	259	120	270.4	7.9	0.0740192
16To_05_60.FIN2	316	4.09	3.41	0.19	0.264	0.008	0.83873	1506	46	1511	41	1514	100	1514	100	0.198151
16To_05_61.FIN2	375	2.46	0.073	0.0047	0.01077	0.00032	0.3388	71.4	4.4	69.1	2	157	120	69.1	2	3.22129
16To_05_63.FIN2	1590	6.2	0.2726	0.018	0.0391	0.0014	0.66184	246.6	13	247.5	9	247	140	247.5	9	0.364964	Rim
16To_05_63.FIN2	240	1.81	3.563	0.21	0.2706	0.0079	0.6974	1539	47	1543	40	1568	100	1568	100	1.59439	Core
16To_05_64.FIN2	622	6.97	0.445	0.027	0.0604	0.0022	0.58523	373.5	19	379	14	409	120	379	14	1.47256
16To_05_65.FIN2	127.5	1.3	0.2684	0.017	0.03893	0.0011	0.13977	241.4	13	246.2	6.8	214	120	246.2	6.8	1.9884
16To_05_66.FIN2	452	1.041	0.4924	0.028	0.06701	0.002	0.48926	405.9	19	418	12	348	120	418	12	2.98103
16To_05_67.FIN2	411	0.8662	0.0722	0.0045	0.01101	0.00031	0.075704	70.9	4.2	70.59	2	137	120	70.59	2	0.437236
16To_05_68.FIN2	598	2.41	0.3049	0.018	0.04406	0.0013	0.20278	270	14	277.9	8	254	130	277.9	8	2.92593
16To_05_69.FIN2	576	0.901	0.2026	0.012	0.0279	0.00079	0.44397	187.2	10	177.4	5	315	120	177.4	5	5.23504
16To_05_70.FIN2	405.4	1.937	0.1584	0.0099	0.02401	0.00078	0.42726	149.4	8.8	152.9	4.9	145	120	152.9	4.9	2.3427
16To_05_71.FIN2	277	1.284	0.0737	0.0051	0.01091	0.00035	0.33628	72.9	4.8	70	2.2	151	130	70	2.2	3.97805
16To_05_73.FIN2	101.7	0.821	0.0643	0.0055	0.0098	0.00039	0.27437	63	5.2	62.9	2.5	110	150	62.9	2.5	0.15873
16To_05_74.FIN2	863	1.198	0.081	0.0048	0.01214	0.00036	0.3573	79	4.5	77.8	2.3	141	120	77.8	2.3	1.51899
16To_05_75.FIN2	557	0.946	0.1786	0.01	0.02624	0.00071	0.36793	166.7	8.8	167	4.5	184	120	167	4.5	0.179964
16To_05_76.FIN2	414.3	2.23	0.0808	0.0052	0.01209	0.00035	0.27206	78.8	4.9	77.4	2.3	127	120	77.4	2.3	1.77665
16To_05_77.FIN2	287.6	0.5614	11.45	0.64	0.4821	0.014	0.50605	2560	53	2539	59	2603	87	2603	87	2.4587
16To_05_78.FIN2	324	2.3	2.321	0.14	0.2047	0.0071	0.79146	1216	43	1201	38	1265	110	1265	110	5.05929
16To_05_79.FIN2	351.1	1.071	0.0896	0.0055	0.01313	0.00038	0.18413	87.3	5.1	84.1	2.4	200	120	84.1	2.4	3.66552
16To_05_80.FIN2	322.1	59	1.16	0.072	0.1259	0.0038	0.5038	783	33	764	22	877	120	764	22	2.42656
16To_05_81.FIN2	1023	1.924	0.0653	0.0038	0.00993	0.00028	0.20804	64.2	3.6	63.68	1.8	105	120	63.68	1.8	0.809969
16To_05_82.FIN2	19.54	0.831	0.955	0.079	0.1069	0.0042	0.28945	684	43	654	24	770	180	654	24	4.38596
16To_05_83.FIN2	380.3	0.969	0.0646	0.0044	0.01014	0.00029	0.029784	63.5	4.1	65.06	1.9	36	120	65.06	1.9	2.45669
16To_05_84.FIN2	531	0.874	0.2944	0.017	0.03916	0.0011	0.25492	262.2	13	247.6	6.8	391	120	247.6	6.8	5.56827
16To_05_85.FIN2	92.3	1.047	2.594	0.15	0.2174	0.006	0.45474	1298	41	1268	31	1360	100	1360	100	6.76471
16To_05_86.FIN2	383	3.49	0.1023	0.0065	0.01449	0.00045	0.36283	98.8	6	92.7	2.9	280	130	92.7	2.9	6.17409
16To_05_87.FIN2	116.2	0.825	0.2101	0.014	0.03044	0.00092	0.16659	193.6	12	193.2	5.8	166	130	193.2	5.8	0.206612
16To_05_88.FIN2	159.7	0.761	0.537	0.032	0.0679	0.002	0.34721	436	21	423.3	12	554	120	423.3	12	2.91284
16To_05_90.FIN2	72.2	1.281	2.558	0.16	0.2104	0.0071	0.87006	1291	46	1229	38	1427	110	1427	110	13.8753
16To_05_91.FIN2	464	1.868	0.0839	0.0056	0.01252	0.00049	0.36739	81.7	5.3	80.2	3.1	126	130	80.2	3.1	1.83599
16To_05_92.FIN2	258	1.63	0.0905	0.0061	0.01311	0.00043	0.23036	88.1	5.8	84	2.7	210	130	84	2.7	4.6538
16To_05_93.FIN2	486	2.272	0.0836	0.0052	0.01305	0.00044	0.4156	81.4	4.9	83.6	2.8	47	110	83.6	2.8	2.7027
16To_05_94.FIN2	283.8	1.793	0.0855	0.0058	0.01326	0.00048	0.10172	83.5	5.3	84.9	3	83	130	84.9	3	1.67665
16To_05_95.FIN2	119.1	2.435	0.0855	0.008	0.01229	0.00056	0.002088	83	7.5	78.7	3.6	200	190	78.7	3.6	5.18072
16To_05_96.FIN2	1409	1.392	0.0857	0.0055	0.01304	0.0005	0.52432	83.6	5	83.5	3.2	88	120	83.5	3.2	0.119617
16To_05_97.FIN2	142	1.222	3.559	0.21	0.2583	0.0086	0.64292	1537	48	1479	44	1624	100	1624	100	8.92857
16To_05_98.FIN2	292	0.903	0.194	0.012	0.02807	0.0008	0.22248	180.2	9.9	178.4	5	220	120	178.4	5	0.99889
16To_05_99.FIN2	320.6	1.045	0.2598	0.016	0.03587	0.0011	0.14679	234	13	227.2	7	324	140	227.2	7	2.90598
16To_05_100.FIN2	445	3.08	0.0814	0.0054	0.01206	0.00044	0.3252	79.3	5.1	77.3	2.8	172	130	77.3	2.8	2.52207
16To_05_101.FIN2	163.2	1.73	0.086	0.0059	0.01298	0.00042	0.22331	83.6	5.5	83.1	2.7	128	130	83.1	2.7	0.598086
16To_05_103.FIN2	154.6	1.839	2.763	0.16	0.2303	0.0067	0.66864	1344	42	1335	35	1372	100	1372	100	2.69679
16To_05_104.FIN2	172	1.943	4.53	0.33	0.305	0.016	0.66416	1734	61	1720	80	1746	120	1746	120	1.48912
16To_05_105.FIN2	49.8	0.974	0.0795	0.0093	0.01198	0.00057	0.17276	76.8	8.7	76.8	3.6	130	210	76.8	3.6	0
16To_05_106.FIN2	431	0.921	0.1716	0.01	0.02497	0.0008	0.33143	160.6	8.8	159	5	193	120	159	5	0.996264
16To_05_107.FIN2	282.1	1.384	0.2002	0.012	0.02913	0.00086	0.36604	185.4	10	185.1	5.4	220	120	185.1	5.4	0.161812
16To_05_108.FIN2	102.2	0.869	4.258	0.24	0.2941	0.0083	0.42346	1685	45	1661	41	1704	98	1704	98	2.52347
16To_05_109.FIN2	166.3	0.95	0.615	0.037	0.0766	0.0023	0.32973	487	24	475.6	14	540	120	475.6	14	2.34086
16To_05_110.FIN2	47.79	0.648	0.064	0.0081	0.00922	0.0004	0.063541	63.1	7.8	59.1	2.6	210	230	59.1	2.6	6.33914
16To_05_112.FIN2	106.9	8.23	2.43	0.2	0.209	0.013	0.61628	1231	58	1214	69	1269	140	1269	140	4.33412
16To_05_113.FIN2	262	2.8	3.329	0.2	0.2558	0.0087	0.70313	1485	46	1466	45	1522	100	1522	100	3.67937
16To_05_114.FIN2	311.1	0.979	0.0644	0.0043	0.00964	0.00029	0.11417	63.3	4.1	62	1.9	138	130	62	1.9	2.05371
16To_05_115.FIN2	216	0.916	0.2359	0.014	0.03355	0.00097	0.14275	214.5	12	212.7	6.1	219	120	212.7	6.1	0.839161
16To_05_116.FIN2	321	1.227	0.0939	0.0064	0.01394	0.0005	0.2355	91.3	6	89.2	3.2	150	130	89.2	3.2	2.30011
16To_05_117.FIN2	202.3	0.916	0.0771	0.0058	0.01008	0.00038	0.22944	75.2	5.4	64.7	2.4	400	150	64.7	2.4	13.9628
16To_05_118.FIN2	658	0.7016	0.1686	0.0095	0.02509	0.00068	0.1062	158.3	8.2	159.8	4.2	139	120	159.8	4.2	0.947568
16To_05_119.FIN2	56.2	0.923	1.883	0.12	0.1817	0.0073	0.48507	1075	43	1080	41	1045	130	1045	130	3.34928
16To_05_120.FIN2	78.1	99	0.395	0.027	0.0527	0.0018	0.32446	338	20	330.8	11	372	140	330.8	11	2.13018
16To_05_121.FIN2	136.8	1.566	0.0805	0.0058	0.01233	0.00043	0.14735	78.7	5.5	79	2.7	98	130	79	2.7	0.381194
16To_05_122.FIN2	468	1.752	0.0836	0.0054	0.01234	0.00036	0.26975	81.4	5	79	2.3	147	120	79	2.3	2.9484
16To_05_123.FIN2	695	1.962	0.0895	0.0058	0.01274	0.00045	0.36818	86.9	5.4	81.6	2.9	244	130	81.6	2.9	6.09896
16To_05_124.FIN2	353	0.661	0.1769	0.01	0.02668	0.00078	0.25197	165.2	8.9	169.7	4.9	122	120	169.7	4.9	2.72397
16To_05_125.FIN2	151	3.02	0.116	0.015	0.0146	0.0013	0.17561	110	14	93.6	8.4	490	230	93.6	8.4	14.9091	Rim
16To_05_125.FIN2	107.5	1.078	1.939	0.14	0.1528	0.0092	0.82294	1099	46	919	52	1483	120	DISC	DISC	38.031	Core
16To_05_126.FIN2	303	1.131	0.2909	0.017	0.04033	0.0012	0.26226	259.4	13	255.2	7.4	316	120	255.2	7.4	1.61912
16To_05_127.FIN2	224	2.3	0.0833	0.0065	0.01258	0.00044	0.21883	81	6.1	80.6	2.8	70	140	80.6	2.8	0.493827
16To_05_128.FIN2	271	0.98	2.985	0.16	0.246	0.0065	0.60503	1403.5	41	1417.3	34	1392	100	1392	100	1.81753
16To_05_129.FIN2	641	33.5	1.785	0.1	0.1721	0.0048	0.61145	1038	37	1023	26	1084	100	1084	100	5.62731
16To_05_130.FIN2	105	0.775	12.3	0.68	0.5025	0.014	0.58023	2627	51	2623	61	2637	86	2637	86	0.530906
16To_05_131.FIN2	135	1.027	3.132	0.2	0.2594	0.01	0.70742	1444	47	1487	52	1383	110	1383	110	7.51988
16To_05_132.FIN2	50.8	1.419	0.076	0.0084	0.01219	0.00063	0.22761	73.5	7.9	78.1	4	50	190	78.1	4	6.2585
16To_05_133.FIN2	138.3	1.547	0.2946	0.018	0.04181	0.0014	0.39394	261.3	14	263.9	8.7	253	130	263.9	8.7	0.995025
16To_05_134.FIN2	69.3	0.478	0.1612	0.012	0.02403	0.00087	0.20398	150.6	11	153	5.5	160	140	153	5.5	1.59363
16To_05_135.FIN2	647	5.87	0.4684	0.026	0.06243	0.0017	0.48937	391	18	390.3	10	407	120	390.3	10	0.179028
16To_05_136.FIN2	230	3.54	0.23	0.017	0.032	0.0016	0.52166	212	14	202.6	10	353	140	202.6	10	4.43396
16To_05_137.FIN2	196	2.137	2.167	0.12	0.199	0.0055	0.37481	1170	38	1170	29	1191	110	1191	110	1.76322
16To_05_138.FIN2	586	1.989	0.0813	0.005	0.0122	0.00043	0.38739	79.2	4.7	78.2	2.7	160	120	78.2	2.7	1.26263
16To_05_140.FIN2	233.7	0.91	0.0802	0.0055	0.01143	0.00034	0.20255	78.8	5.1	73.3	2.2	250	130	73.3	2.2	6.9797
GJ1_1.FIN2	384	46.5	0.81	0.045	0.0965	0.0028	0.508	602.3	26	593.8	16	648	110	593.8	16	1.41126
GJ1_2.FIN2	377	46.1	0.815	0.045	0.0984	0.0028	0.54159	605.2	26	605.1	16	611	110	605.1	16	0.0165235
GJ1_3.FIN2	377	46.3	0.813	0.045	0.099	0.0028	0.48569	604.7	25	608.6	17	613	120	608.6	17	0.644948
GJ1_4.FIN2	388	46.3	0.803	0.045	0.0972	0.0028	0.46219	599.2	25	597.9	16	610	120	597.9	16	0.216956
GJ1_5.FIN2	386	45.7	0.799	0.044	0.0978	0.0028	0.53327	596	25	601.4	17	586	120	601.4	17	0.90604
GJ1_6.FIN2	385	45.2	0.8	0.044	0.0992	0.0029	0.37892	595.9	25	609.5	17	576	120	609.5	17	2.28226
GJ1_7.FIN2	391.2	45	0.783	0.044	0.0971	0.0027	0.45709	586.9	25	597.4	16	587	110	597.4	16	1.78906
GJ1_8.FIN2	393	44.8	0.797	0.045	0.0968	0.0028	0.57043	595.7	25	596.4	16	634	110	596.4	16	0.117509
GJ1_9.FIN2	389	45.4	0.796	0.044	0.0968	0.0027	0.53	594.1	25	595.4	16	598	120	595.4	16	0.218818
GJ1_10.FIN2	384.6	45.2	0.81	0.045	0.0966	0.0028	0.46211	602.9	25	594.3	17	664	120	594.3	17	1.42644
GJ1_12.FIN2	363	47.1	0.843	0.05	0.0993	0.0031	0.65444	622	27	610	18	639	120	610	18	1.92926
GJ1_13.FIN2	389.5	46.6	0.795	0.046	0.0979	0.0031	0.54964	594.6	26	602	18	558	120	602	18	1.24453
GJ1_14.FIN2	382.4	45.9	0.817	0.047	0.0964	0.003	0.5679	604.6	26	593	18	634	120	593	18	1.91862
GJ1_15.FIN2	385.4	44.4	0.826	0.048	0.0977	0.0033	0.55462	610.4	27	600	19	584	120	600	19	1.7038
GJ1_16.FIN2	391	45.9	0.801	0.047	0.098	0.0033	0.61519	597.4	26	602	19	537	110	602	19	0.770003
GJ1_17.FIN2	386	44.4	0.83	0.048	0.0995	0.0034	0.59668	614	27	611	20	575	120	611	20	0.488599
GJ1_18.FIN2	337	48	0.872	0.052	0.0992	0.0037	0.65756	634	28	609	22	713	120	609	22	3.94322
GJ1_19.FIN2	395	48.1	0.791	0.047	0.0958	0.0034	0.63859	591	26	589	20	581	120	589	20	0.338409
GJ1_20.FIN2	386	44.7	0.804	0.047	0.0975	0.003	0.5965	598.1	26	599	18	561	120	599	18	0.150477
GJ1_21.FIN2	394	47.1	0.768	0.044	0.0964	0.003	0.5262	578.4	25	593	18	529	120	593	18	2.5242
GJ1_22.FIN2	383.8	44.4	0.84	0.048	0.0983	0.003	0.47792	620.5	26	605.2	17	689	110	605.2	17	2.46575
GJ1_24.FIN2	390	44.1	0.804	0.046	0.0973	0.0031	0.61317	598.6	26	598	18	584	120	598	18	0.100234
GJ1_25.FIN2	381.4	47.2	0.841	0.048	0.097	0.003	0.61276	620	27	597	18	650	110	597	18	3.70968
GJ1_26.FIN2	370	45.6	0.836	0.048	0.0996	0.0032	0.61459	620	26	612	19	610	110	612	19	1.29032
GJ1_27.FIN2	392	44.5	0.82	0.047	0.0974	0.0031	0.5357	606.6	26	600	18	604	120	600	18	1.08803
GJ1_28.FIN2	359	49	0.839	0.048	0.098	0.0032	0.52454	618	26	604	19	657	120	604	19	2.26537
GJ1_29.FIN2	391	45.3	0.819	0.046	0.0968	0.0031	0.55009	607.8	26	596	18	642	120	596	18	1.94143
GJ1_30.FIN2	395	46	0.802	0.046	0.0978	0.0031	0.60444	596.6	26	601	18	554	120	601	18	0.737513
GJ1_31.FIN2	384.5	45.3	0.829	0.048	0.0968	0.0029	0.60799	611.4	26	595.3	17	645	120	595.3	17	2.6333
GJ1_32.FIN2	381	45	0.861	0.049	0.0981	0.003	0.60679	629.4	26	603.1	17	698	110	603.1	17	4.17858
GJ1_33.FIN2	385.1	46.4	0.803	0.046	0.0989	0.0031	0.59761	599	26	608	18	543	120	608	18	1.5025
GJ1_34.FIN2	383.7	45.6	0.796	0.046	0.0957	0.003	0.58264	594.9	26	590	18	577	120	590	18	0.823668
GJ1_35.FIN2	386	45.5	0.814	0.047	0.0983	0.003	0.60376	604	26	604.1	18	599	120	604.1	18	0.0165563
GJ1_36.FIN2	390	44.2	0.812	0.046	0.0984	0.0031	0.5969	603.1	26	606	18	583	120	606	18	0.480849
GJ1_37.FIN2	394	46.8	0.788	0.046	0.0969	0.0032	0.62246	589.4	26	596	19	537	120	596	19	1.11978
GJ1_38.FIN2	383.9	45.6	0.848	0.05	0.0962	0.0031	0.59945	625	27	592	18	677	110	592	18	5.28
GJ1_39.FIN2	336	47.8	0.826	0.049	0.0998	0.0035	0.62849	612	28	613	20	535	120	613	20	0.163399
GJ1_40.FIN2	372	48.6	0.829	0.049	0.0971	0.0034	0.67842	612	27	598	20	630	120	598	20	2.28758
GJ1_41.FIN2	392	43.7	0.821	0.047	0.098	0.0033	0.57204	607.9	26	603	19	586	120	603	19	0.806054
GJ1_42.FIN2	382.6	44.2	0.825	0.048	0.0975	0.0032	0.56035	609.9	27	599	19	602	120	599	19	1.78718
GJ1_43.FIN2	397	45.4	0.807	0.048	0.0966	0.0034	0.69977	598	27	594	20	580	120	594	20	0.668896
GJ1_44.FIN2	384	45.9	0.788	0.046	0.0991	0.0033	0.61303	589	26	610	19	495	120	610	19	3.56537
GJ1_46.FIN2	375	46.8	0.795	0.047	0.0992	0.0035	0.638	596	27	611	21	572	120	611	21	2.51678
GJ1_47.FIN2	389	45.8	0.816	0.047	0.0953	0.0031	0.53378	606.8	26	586	18	672	120	586	18	3.42782
GJ1_48.FIN2	385	45.1	0.814	0.048	0.0991	0.0034	0.47362	605	27	610	20	633	120	610	20	0.826446
GJ1_49.FIN2	390	46.5	0.776	0.045	0.096	0.0033	0.62195	582.6	25	590	20	586	120	590	20	1.27017
GJ1_50.FIN2	379	45	0.835	0.049	0.0978	0.0035	0.61783	615	27	601	21	693	120	601	21	2.27642
GJ1_51.FIN2	379.5	45.4	0.793	0.047	0.0997	0.0034	0.54808	592	26	612	20	558	120	612	20	3.37838
GJ1_52.FIN2	381	45.7	0.819	0.048	0.0969	0.0034	0.63593	607	27	596	20	676	120	596	20	1.81219
GJ1_53.FIN2	395	45.4	0.78	0.047	0.0953	0.0032	0.63055	585	27	588	19	561	120	588	19	0.512821
GJ1_54.FIN2	380.5	47.5	0.792	0.046	0.099	0.0034	0.60422	592	26	608	20	563	120	608	20	2.7027
GJ1_55.FIN2	377	44.1	0.794	0.047	0.1005	0.0036	0.59935	591	27	617	21	489	120	617	21	4.39932
GJ1_56.FIN2	397	47.8	0.783	0.045	0.0965	0.0033	0.67285	587.3	26	593	20	566	120	593	20	0.970543
GJ1_57.FIN2	398	44.7	0.778	0.045	0.0971	0.0033	0.46441	584.3	26	597	20	556	130	597	20	2.17354
GJ1_59.FIN2	376.8	45.5	0.826	0.049	0.0972	0.0033	0.70672	610	28	597	19	666	120	597	19	2.13115
GJ1_60.FIN2	387	47.2	0.763	0.045	0.0973	0.0035	0.59267	574	26	601	20	507	120	601	20	4.70383
GJ1_61.FIN2	374	45.1	0.843	0.05	0.0984	0.0033	0.58627	620	27	605	20	667	120	605	20	2.41935
GJ1_63.FIN2	376	45.8	0.839	0.049	0.0991	0.0035	0.61816	617	27	609	20	698	120	609	20	1.2966
GJ1_64.FIN2	387	43.9	0.84	0.049	0.0972	0.0032	0.58539	618	27	598	19	728	110	598	19	3.23625
GJ1_65.FIN2	401	48.7	0.794	0.048	0.0956	0.0034	0.59433	592	26	588	20	628	120	588	20	0.675676
GJ1_66.FIN2	396	45.5	0.786	0.046	0.0977	0.0033	0.55389	592	26	601	19	600	120	601	19	1.52027
GJ1_67.FIN2	365	45.7	0.812	0.047	0.0982	0.0033	0.62567	603.9	26	605	19	611	130	605	19	0.182149
Pak1_1.FIN2	126.1	1.369	0.0485	0.0041	0.00756	0.00031	0.091218	48	3.9	48.6	2	60	150	48.6	2	1.25
Pak1_2.FIN2	87.2	1.478	0.0468	0.0049	0.00731	0.00034	0.16559	46.1	4.8	47	2.2	0	180	47	2.2	1.95228
Pak1_3.FIN2	92.6	1.421	0.0443	0.0047	0.00723	0.00033	0.11208	43.7	4.6	46.4	2.1	-30	180	46.4	2.1	6.17849
Pak1_4.FIN2	87.7	1.303	0.0468	0.0046	0.00732	0.00032	0.312	46.6	4.5	47	2.1	50	170	47	2.1	0.858369
Pak1_5.FIN2	127.3	1.283	0.0469	0.0044	0.007	0.00029	0.21699	46.3	4.3	44.9	1.9	140	170	44.9	1.9	3.02376
Pak1_6.FIN2	132.8	1.37	0.0469	0.0043	0.00753	0.00031	0.15185	46.3	4.1	48.4	2	-10	160	48.4	2	4.53564
Pak1_7.FIN2	113.4	1.328	0.0484	0.0048	0.00772	0.00033	0.17159	47.7	4.6	49.6	2.1	100	160	49.6	2.1	3.98323
Plesovice_1.FIN2	753	7.79	0.4093	0.024	0.0556	0.0019	0.60325	347.5	17	348.5	11	373	120	348.5	11	0.28777
Plesovice_2.FIN2	732	7.71	0.4161	0.024	0.0561	0.002	0.63286	352.4	18	351.5	12	307	120	351.5	12	0.255392
Plesovice_3.FIN2	759	8.21	0.4194	0.025	0.0547	0.0019	0.68445	356	17	343.3	11	379	130	343.3	11	3.56742
Plesovice_4.FIN2	875	6.94	0.4202	0.024	0.0555	0.0018	0.5742	356.1	17	348.2	11	366	120	348.2	11	2.21848
Plesovice_5.FIN2	834	7.44	0.4062	0.024	0.0528	0.0017	0.5013	345.9	17	331.7	11	380	120	331.7	11	4.10523
Plesovice_6.FIN2	789	7.76	0.3948	0.023	0.054	0.0018	0.59164	337.1	17	338.8	11	344	120	338.8	11	0.504301
Plesovice_7.FIN2	648	8.47	0.3864	0.022	0.0551	0.0018	0.65144	331.7	16	346	11	259	120	346	11	4.31112

## Sheet: 16TO06,12
Sample Name:				2σ Prop		2σ Prop		207/235	2σ Prop	206/238	2σ Prop	207/206	2σ Prop	Best age	2σ Prop
Grain #	[U] ppm	U/Th	207/235	error	206/238	error	RHO	Age Ma	error	Age (Ma)	error	Age (Ma)	error	(Ma)	error	% Discordance*	Rim/Core
16To_06_1.FIN2	70.7	0.558	1.305	0.057	0.1417	0.005	0.65492	844	25	853	28	837	75	837	28	1.06635
16To_06_2.FIN2	266	1.462	0.1532	0.007	0.02256	0.00066	0.31349	145.2	6.3	143.8	4.2	137	85	143.8	4.2	0.964187
16To_06_3.FIN2	423	3.735	0.1018	0.0049	0.01497	0.00047	0.31774	98.3	4.5	95.8	3	173	89	95.8	3	2.54323
16To_06_4.FIN2	2530	2.23	0.1129	0.0076	0.01462	0.00075	0.42448	108.5	6.9	93.6	4.8	520	140	93.6	4.8	13.7327
16To_06_5.FIN2	546	0.927	0.0887	0.004	0.01336	0.00038	0.23842	86.4	3.7	85.57	2.4	99	83	85.57	2.4	0.960648
16To_06_6.FIN2	60.2	2.796	0.287	0.017	0.04011	0.0013	0.11014	256	13	253.5	8.2	270	120	253.5	8.2	0.976562
16To_06_7.FIN2	117.2	1.495	0.0996	0.0073	0.01424	0.00047	0.00083444	95.9	6.7	91.1	3	220	140	91.1	3	5.00521
16To_06_8.FIN2	302	1.464	0.0983	0.0048	0.01466	0.00044	0.061378	95.4	4.5	93.8	2.8	161	99	93.8	2.8	1.67715
16To_06_9.FIN2	373.9	2.106	0.1062	0.0053	0.01545	0.0005	0.41662	102.6	4.8	98.8	3.2	218	94	98.8	3.2	3.7037
16To_06_10.FIN2	321.3	2.979	0.0949	0.0044	0.01429	0.00045	0.13348	92.2	4	91.4	2.9	123	90	91.4	2.9	0.867679
16To_06_11.FIN2	81.8	1.323	0.1014	0.0081	0.01477	0.00052	0.25512	98.7	7.3	94.5	3.3	210	140	94.5	3.3	4.25532
16To_06_12.FIN2	607	3.97	0.694	0.026	0.0864	0.0026	0.57761	535.2	16	535	15	546	72	535	15	0.0373692
16To_06_13.FIN2	23.2	1.013	0.396	0.032	0.0521	0.0022	0.12483	332	23	327	13	330	150	327	13	1.50602
16To_06_14.FIN2	660	1.581	0.0766	0.0033	0.01139	0.00033	0.21846	75.1	3.1	73.02	2.1	135	83	73.02	2.1	2.76964
16To_06_15.FIN2	173.3	1.24	0.1038	0.0057	0.01523	0.00048	0.026762	100.4	5.1	97.4	3	169	110	97.4	3	2.98805
16To_06_16.FIN2	156.6	1.275	0.081	0.0047	0.01296	0.00041	0.081766	78.9	4.4	83	2.6	37	110	83	2.6	5.19645
16To_06_17.FIN2	204	2.677	3.94	0.18	0.2577	0.01	0.67584	1624	36	1478	52	1846	68	1846	68	19.935
16To_06_18.FIN2	542	46	0.545	0.044	0.0698	0.0041	0.95917	442	28	435	25	490	89	435	25	1.58371	Rim
16To_06_18.FIN2	60.3	1.546	1.677	0.068	0.1667	0.0049	0.25735	1002	26	993	27	1033	77	1033	77	3.87222	Core
16To_06_19.FIN2	519	1.17	0.0891	0.0041	0.01392	0.00041	0.26379	86.6	3.8	89.1	2.6	47	83	89.1	2.6	2.88684
16To_06_20.FIN2	136.4	1.075	0.0919	0.0075	0.01418	0.00059	0.17647	88.9	7	90.7	3.7	40	140	90.7	3.7	2.02475	Rim
16To_06_20.FIN2	304	0.897	2.33	0.2	0.188	0.014	0.97396	1213	66	1107	80	1430	75	1430	75	22.5874	Core
16To_06_21.FIN2	178.2	2.336	0.0894	0.0054	0.01414	0.00046	0.13924	86.6	5.1	90.5	2.9	14	110	90.5	2.9	4.50346
16To_06_22.FIN2	133.7	1.485	0.0717	0.005	0.01163	0.00041	0.24636	70	4.7	74.5	2.6	-10	120	74.5	2.6	6.42857
16To_06_23.FIN2	337	0.973	0.307	0.013	0.04379	0.0015	0.49751	271.4	9.9	276.2	9	225	81	276.2	9	1.76861
16To_06_24.FIN2	118.3	0.94	0.0764	0.0053	0.01142	0.00042	0.02627	75.2	5	73.2	2.7	180	130	73.2	2.7	2.65957
16To_06_26.FIN2	410	1.451	0.1832	0.0084	0.02728	0.00091	0.43732	170.5	7.2	173.5	5.7	140	86	173.5	5.7	1.75953
16To_06_27.FIN2	215.5	0.825	4.203	0.16	0.2929	0.0095	0.66917	1674	30	1658	48	1724	60	1724	60	3.82831
16To_06_28.FIN2	527	1.234	0.2772	0.011	0.0394	0.0011	0.37911	248.1	8.4	249.1	7	265	78	249.1	7	0.403063
16To_06_29.FIN2	212.4	1.094	0.0929	0.0051	0.01374	0.00042	0.12552	90.3	4.7	87.9	2.7	160	100	87.9	2.7	2.65781
16To_06_30.FIN2	76.9	1.108	1.979	0.079	0.1867	0.0058	0.48119	1107	27	1103	32	1127	71	1127	71	2.12955
16To_06_31.FIN2	33.9	0.787	4.328	0.17	0.3079	0.0095	0.46107	1697	33	1729	47	1693	67	1693	67	2.1264
16To_06_32.FIN2	62.5	1.04	1.798	0.073	0.1756	0.0055	0.47926	1043	26	1042	30	1076	73	1076	73	3.15985
16To_06_33.FIN2	152	1.322	4.162	0.15	0.2999	0.0087	0.66677	1665	30	1690	43	1651	59	1651	59	2.3622
16To_06_34.FIN2	563	3.295	1.612	0.061	0.1651	0.0052	0.56772	974	23	985	29	969	68	969	68	1.65119	Rim
16To_06_34.FIN2	248.5	1.364	2.108	0.086	0.1935	0.0068	0.70625	1149	28	1140	37	1188	66	1188	66	4.0404	Core
16To_06_35.FIN2	68.7	1.053	0.0868	0.0086	0.01138	0.00042	0.079785	83.6	8	72.9	2.7	390	200	72.9	2.7	12.799
16To_06_36.FIN2	801	2.57	0.091	0.0038	0.01386	0.00041	0.1407	88.6	3.5	88.7	2.6	112	81	88.7	2.6	0.112867
16To_06_37.FIN2	319	1.808	0.1347	0.0067	0.01965	0.00064	0.39691	128.4	6	125.4	4.1	160	91	125.4	4.1	2.33645
16To_06_38.FIN2	776	1.467	0.0736	0.0033	0.01146	0.00035	0.41251	72	3.1	73.5	2.3	81	81	73.5	2.3	2.08333
16To_06_39.FIN2	300	0.792	0.1864	0.0098	0.02753	0.00088	0.17287	173.3	8.3	175.1	5.5	157	100	175.1	5.5	1.03866
16To_06_40.FIN2	241.8	1.414	0.0966	0.0052	0.01469	0.00046	0.17215	93.8	4.7	94	2.9	135	100	94	2.9	0.21322
16To_06_41.FIN2	252	1.281	4.008	0.15	0.2921	0.0086	0.72878	1635	30	1651	43	1628	59	1628	59	1.41278
16To_06_42.FIN2	255	2.24	0.2251	0.012	0.0323	0.0015	0.66102	206.7	10	204.9	9.1	188	90	204.9	9.1	0.870827
16To_06_43.FIN2	738	3.06	0.219	0.0098	0.03084	0.0011	0.50975	201.7	8.2	195.8	6.9	268	86	195.8	6.9	2.92514
16To_06_44.FIN2	727	1.599	0.1059	0.0045	0.01547	0.00046	0.26957	102.1	4.1	99	2.9	203	84	99	2.9	3.03624
16To_06_45.FIN2	265	1.087	0.864	0.034	0.1009	0.0031	0.60311	633.9	18	619.3	18	690	75	619.3	18	2.3032
16To_06_46.FIN2	585	0.973	0.1841	0.0076	0.02728	0.00085	0.5774	171.4	6.6	173.5	5.3	141	76	173.5	5.3	1.2252
16To_06_47.FIN2	218	1.17	0.1546	0.0071	0.02363	0.00073	0.23483	145.7	6.2	150.5	4.6	90	85	150.5	4.6	3.29444
16To_06_48.FIN2	514	0.744	0.2055	0.0083	0.03044	0.00094	0.38133	190.5	6.7	193.3	5.9	146	78	193.3	5.9	1.46982
16To_06_49.FIN2	248	2.444	0.0761	0.0041	0.01229	0.00039	0.12404	74.4	3.9	78.8	2.5	-9	94	78.8	2.5	5.91398
16To_06_50.FIN2	51.25	1.615	2.103	0.087	0.1922	0.0058	0.54869	1147	29	1134	32	1178	72	1178	72	3.73514
16To_06_51.FIN2	357	2.392	0.077	0.0041	0.01224	0.00043	0.37471	75.1	3.9	78.4	2.8	20	91	78.4	2.8	4.39414
16To_06_52.FIN2	272.6	1.594	0.1793	0.0077	0.02725	0.00084	0.33415	167.2	6.6	173.3	5.2	75	80	173.3	5.2	3.64833
16To_06_53.FIN2	522	3.342	0.1626	0.0079	0.02432	0.00089	0.67995	153.5	6.9	154.8	5.6	151	85	154.8	5.6	0.846906
16To_06_54.FIN2	362	1.074	0.1283	0.0069	0.0185	0.00066	0.44288	122.4	6.2	118.1	4.2	200	100	118.1	4.2	3.51307
16To_06_55.FIN2	227.9	1.76	0.0792	0.0044	0.01163	0.0004	0.27134	77.3	4.1	74.5	2.5	172	110	74.5	2.5	3.62225	Rim
16To_06_55.FIN2	331	1.256	0.32	0.026	0.0431	0.0025	0.63115	281	20	272	15	330	150	272	15	3.20285	Core
16To_06_56.FIN2	143.2	0.994	0.1223	0.007	0.01522	0.0005	0.12994	117.8	6.1	97.4	3.2	561	120	DISC	DISC	17.3175
16To_06_57.FIN2	244	1.119	0.0985	0.005	0.01489	0.00049	0.27253	95.2	4.6	95.3	3.1	149	99	95.3	3.1	0.105042
16To_06_58.FIN2	62.8	1.12	0.064	0.016	0.00961	0.00093	0.38677	62	15	61.6	5.9	80	380	61.6	5.9	0.645161	Rim
16To_06_58.FIN2	49.2	1.239	1.597	0.092	0.1523	0.0084	0.68599	972	39	918	49	1110	100	1110	100	17.2973	Core
16To_06_59.FIN2	121.8	2.064	1.719	0.066	0.1673	0.005	0.43532	1015	25	997	27	1079	71	1079	71	7.59963
16To_06_60.FIN2	307.2	1.446	0.0767	0.0067	0.01135	0.00041	0.4988	74.8	6.2	72.7	2.6	110	140	72.7	2.6	2.80749
16To_06_61.FIN2	479	1.88	0.608	0.023	0.0803	0.0024	0.62078	481.1	15	497.6	14	434	74	497.6	14	3.42964
16To_06_62.FIN2	717	0.91	0.0633	0.0034	0.00939	0.00032	0.24105	62.2	3.3	60.2	2	173	100	60.2	2	3.21543
16To_06_63.FIN2	188.6	6.22	3.876	0.15	0.2801	0.0093	0.70057	1604	33	1593	47	1643	64	1643	64	3.04321
16To_06_64.FIN2	492	3.1	0.785	0.029	0.0967	0.0028	0.49607	588.3	16	594.9	17	588	72	594.9	17	1.12188
16To_06_65.FIN2	491	1.535	0.2934	0.011	0.04096	0.0012	0.2929	261	8.6	258.8	7.5	292	79	258.8	7.5	0.842912
16To_06_66.FIN2	365	1.279	0.0813	0.0043	0.01307	0.00041	0.30292	79.2	4	83.7	2.6	11	88	83.7	2.6	5.68182
16To_06_67.FIN2	1079	1.248	0.0914	0.0036	0.01391	0.00041	0.089234	88.8	3.4	89.1	2.6	108	78	89.1	2.6	0.337838
16To_06_68.FIN2	222.6	1.081	0.305	0.014	0.04104	0.0014	0.42266	269.6	10	259.2	8.9	367	87	259.2	8.9	3.85757
16To_06_69.FIN2	728	2.54	0.3014	0.012	0.04319	0.0013	0.48875	267.2	9.1	272.5	8	243	77	272.5	8	1.98353
16To_06_70.FIN2	584	2.121	0.2821	0.011	0.04037	0.0012	0.47513	252.4	8.6	255.1	7.7	212	78	255.1	7.7	1.06973
16To_06_71.FIN2	91.2	1.929	0.1784	0.011	0.02255	0.00082	0.22204	165.6	9.5	143.7	5.2	490	120	143.7	5.2	13.2246
16To_06_72.FIN2	317	1.815	3.027	0.12	0.242	0.0075	0.78184	1412	30	1396	39	1454	63	1454	63	3.989
16To_06_73.FIN2	99.7	0.891	1.948	0.076	0.1833	0.0057	0.51079	1096	26	1084	31	1134	72	1134	72	4.40917
16To_06_74.FIN2	74.9	1.223	0.1658	0.011	0.0237	0.00084	0.21929	155.2	9.9	151	5.3	240	120	151	5.3	2.70619
16To_06_75.FIN2	161.7	78.9	0.21	0.015	0.0293	0.0014	0.48103	194	12	186.4	8.7	310	130	186.4	8.7	3.91753
16To_06_76.FIN2	348	2.406	10.64	0.38	0.4645	0.013	0.69158	2495	32	2458	60	2533	54	2533	54	2.96092
16To_06_77.FIN2	288.9	2.439	0.0871	0.006	0.01384	0.00048	0.13177	84.6	5.6	88.6	3.1	10	130	88.6	3.1	4.72813	Rim
16To_06_77.FIN2	470	2.169	0.705	0.028	0.0547	0.0018	0.59949	541.5	17	343.2	11	1494	70	DISC	DISC	36.6205	Core
16To_06_78.FIN2	292	2.271	0.0656	0.0034	0.00961	0.0003	0.27463	64.4	3.2	61.6	1.9	197	100	61.6	1.9	4.34783
16To_06_79.FIN2	159.5	1.123	0.543	0.021	0.07118	0.0021	0.16885	439.8	14	443.2	12	433	82	443.2	12	0.773079
16To_06_80.FIN2	606	1.373	0.0574	0.003	0.00899	0.00032	0.34052	57.1	2.9	57.7	2	38	93	57.7	2	1.05079
16To_06_81.FIN2	672	1.019	0.0549	0.0026	0.00888	0.00028	0.3394	54.2	2.5	57	1.8	0	83	57	1.8	5.16605
16To_06_82.FIN2	999	2.275	0.0684	0.0027	0.01058	0.00031	0.28235	67.2	2.6	67.84	2	59	75	67.84	2	0.952381
16To_06_83.FIN2	583	1.501	0.0864	0.0043	0.01225	0.00044	0.54129	84.3	3.9	78.5	2.8	270	91	78.5	2.8	6.88019
16To_06_84.FIN2	437	1.194	0.2972	0.013	0.04081	0.0014	0.66087	263.6	10	257.8	8.5	340	82	257.8	8.5	2.2003
16To_06_85.FIN2	232.2	153	4.575	0.16	0.3076	0.0091	0.71017	1744	30	1728	45	1785	60	1785	60	3.19328
16To_06_86.FIN2	228	0.639	0.0702	0.0048	0.01134	0.00039	0.10398	68.7	4.6	72.7	2.5	-50	120	72.7	2.5	5.82242
16To_06_87.FIN2	321	1.471	0.084	0.0051	0.01304	0.00046	0.11155	81.8	4.8	83.5	2.9	122	110	83.5	2.9	2.07824
16To_06_88.FIN2	224	1.605	2.938	0.1	0.2421	0.007	0.56431	1390.4	27	1398	36	1408	60	1408	60	0.710227
16To_06_89.FIN2	184.7	1.816	3.161	0.12	0.2521	0.0077	0.67956	1446	29	1454	40	1469	63	1469	63	1.0211
16To_06_90.FIN2	397.4	1.284	0.063	0.0038	0.00951	0.00033	0.047143	61.9	3.7	61	2.1	110	120	61	2.1	1.45396	Rim
16To_06_90.FIN2	988	0.74	1.392	0.058	0.1328	0.0046	0.79241	885	25	804	26	1108	70	804	26	9.15254	Core
16To_06_91.FIN2	111.4	2.164	0.138	0.012	0.01488	0.0009	0.17654	130	11	95.2	5.7	750	190	DISC	DISC	26.7692
16To_06_92.FIN2	144.8	1.874	0.0986	0.0062	0.01495	0.00053	0.013577	95.6	5.8	95.6	3.4	160	120	95.6	3.4	0
16To_06_93.FIN2	303	1.658	0.113	0.0055	0.01668	0.00053	0.20505	108.5	5	106.6	3.3	162	94	106.6	3.3	1.75115
16To_06_94.FIN2	245	1.52	1.642	0.076	0.1387	0.0072	0.70511	986	28	836	41	1321	85	DISC	DISC	15.213
16To_06_95.FIN2	43.01	1.107	2.043	0.089	0.1825	0.0067	0.48793	1125	30	1084	37	1215	79	1215	79	10.7819
16To_06_96.FIN2	226	1.57	0.248	0.016	0.0337	0.0015	0.4752	224	13	213.6	9.3	400	120	213.6	9.3	4.64286
16To_06_97.FIN2	631	2.86	4.035	0.14	0.2875	0.0082	0.77955	1640.8	29	1628	41	1688	57	1688	57	3.5545
16To_06_98.FIN2	130	0.907	4.161	0.16	0.2974	0.0093	0.81762	1665	31	1677	46	1680	61	1680	61	0.178571
16To_06_99.FIN2	258.6	0.999	0.0908	0.0047	0.01426	0.00044	0.1573	88.7	4.4	91.3	2.8	24	96	91.3	2.8	2.93123
16To_06_100.FIN2	247	1.113	0.0757	0.0049	0.01159	0.00038	0.080632	73.8	4.6	74.3	2.5	120	110	74.3	2.5	0.677507
16To_06_101.FIN2	43.8	0.669	1.557	0.068	0.1513	0.005	0.3339	952	27	908	28	1063	86	1063	86	14.5814
16To_06_102.FIN2	1110	2.004	0.297	0.014	0.04029	0.0014	0.58834	263.7	11	254.6	8.4	340	89	254.6	8.4	3.45089	Rim
16To_06_102.FIN2	160.3	3.472	3.88	0.17	0.2809	0.0095	0.64227	1606	35	1595	48	1633	65	1633	65	2.32701	Core
16To_06_103.FIN2	393	1.318	0.0861	0.005	0.01129	0.00044	0.34948	83.7	4.6	72.4	2.8	424	110	72.4	2.8	13.5006
16To_06_104.FIN2	218	1.57	0.0716	0.0056	0.01082	0.00051	0.16823	70	5.3	69.4	3.3	140	140	69.4	3.3	0.857143
16To_06_105.FIN2	282	1.193	0.0696	0.0065	0.01049	0.00073	0.57065	68	6.1	67.2	4.6	180	150	67.2	4.6	1.17647
16To_06_106.FIN2	439	1.184	0.0609	0.0031	0.00923	0.00033	0.30209	60	3	59.2	2.1	151	98	59.2	2.1	1.33333
16To_06_107.FIN2	278.4	0.83	0.529	0.021	0.07106	0.0021	0.41066	430.4	14	442.5	13	372	78	442.5	13	2.81134
16To_06_108.FIN2	454	1.591	0.0854	0.0041	0.0133	0.00041	0.19057	83.1	3.8	85.2	2.6	81	90	85.2	2.6	2.52708
16To_06_109.FIN2	413	1.156	0.0882	0.0044	0.01377	0.00043	0.12683	85.6	4.1	88.1	2.7	74	94	88.1	2.7	2.92056
16To_06_110.FIN2	301	1.79	0.447	0.018	0.05985	0.0018	0.44204	376.2	13	374.7	11	396	82	374.7	11	0.398724
16To_06_111.FIN2	450	1.695	0.844	0.032	0.1018	0.0031	0.63193	621.4	18	624.9	18	632	72	624.9	18	0.563244
16To_06_112.FIN2	449	2.05	0.0861	0.0038	0.0125	0.00038	0.23624	84	3.5	80.1	2.4	205	89	80.1	2.4	4.64286
16To_06_113.FIN2	256	1.965	0.742	0.036	0.0952	0.0039	0.61146	561	21	586	23	504	95	586	23	4.45633
16To_06_114.FIN2	147.9	1.534	0.0854	0.0053	0.01338	0.00044	0.12483	82.9	4.9	85.7	2.8	52	110	85.7	2.8	3.37756
16To_06_115.FIN2	579	3	0.0883	0.0043	0.01353	0.00047	0.43986	85.7	4	86.6	3	106	84	86.6	3	1.05018
16To_06_116.FIN2	456	0.774	0.0598	0.0029	0.00938	0.00028	0.1372	59.1	2.8	60.21	1.8	56	88	60.21	1.8	1.87817
16To_06_117.FIN2	85.6	1.796	2.916	0.12	0.2399	0.0076	0.61063	1383	29	1387	39	1385	68	1385	68	0.144404
16To_06_118.FIN2	158.4	4.51	0.1068	0.0079	0.01534	0.00079	0.34122	102.3	7.2	98.1	5	210	130	98.1	5	4.10557
16To_06_119.FIN2	280	1.173	0.0825	0.0046	0.01214	0.00042	0.1748	80.3	4.3	77.8	2.7	177	100	77.8	2.7	3.11333
16To_06_120.FIN2	1384	0.854	0.0649	0.0028	0.0098	0.00031	0.44473	63.8	2.6	62.8	2	134	79	62.8	2	1.5674
16To_06_121.FIN2	89.4	0.932	3.786	0.15	0.2731	0.0092	0.5614	1591	30	1555	46	1653	65	1653	65	5.92861
16To_06_122.FIN2	159	1.996	0.0858	0.005	0.01283	0.00044	0.25189	83.3	4.7	82.2	2.8	159	110	82.2	2.8	1.32053
16To_06_123.FIN2	229	7.36	1.41	0.12	0.1262	0.01	0.79453	904	48	764	57	1298	100	DISC	DISC	15.4867	Rim
16To_06_123.FIN2	144.4	2.16	5.58	0.25	0.3402	0.013	0.86827	1917	38	1885	63	1987	60	1987	60	5.13337	Core
16To_06_124.FIN2	224.3	2.301	0.0927	0.0056	0.01318	0.00044	0.21591	89.8	5.2	84.4	2.8	220	120	84.4	2.8	6.01336
16To_06_125.FIN2	573	1.742	0.0925	0.0043	0.0141	0.00044	0.31065	89.7	4	90.3	2.8	85	85	90.3	2.8	0.668896
16To_06_126.FIN2	566	0.945	0.0708	0.0032	0.01098	0.00033	0.25618	69.4	3	70.37	2.1	57	82	70.37	2.1	1.39769
16To_06_127.FIN2	181.2	1.426	1.581	0.058	0.1603	0.0046	0.33701	961.6	23	958.3	26	966	68	966	68	0.797101
16To_06_128.FIN2	137.3	0.732	0.1615	0.0075	0.02344	0.00071	0.067934	152.1	6.4	149.4	4.5	192	93	149.4	4.5	1.77515
16To_06_129.FIN2	195.4	0.8339	0.1027	0.0057	0.01575	0.0005	0.25933	98.9	5.3	100.7	3.2	71	97	100.7	3.2	1.82002
16To_06_130.FIN2	306	1.266	0.0992	0.0048	0.01507	0.00047	0.27	96.2	4.4	96.4	3	81	89	96.4	3	0.2079
16To_12_1.FIN2	425	1.275	0.0727	0.0035	0.01061	0.00035	0.21225	71.2	3.3	68	2.2	176	95	68	2.2	4.49438
16To_12_2.FIN2	58.6	1.05	0.074	0.019	0.0112	0.0014	0.57744	71	18	72	9.1	20	380	DISC	DISC	1.40845	Rim
16To_12_2.FIN2	144.2	0.419	0.231	0.013	0.03277	0.0012	0.37112	211	11	207.8	7.2	284	110	207.8	7.2	1.51659	Core
16To_12_3.FIN2	113.6	1.148	1.813	0.068	0.1775	0.0052	0.33389	1049	25	1053	29	1042	67	1042	67	1.05566
16To_12_4.FIN2	92.5	2.074	0.1055	0.0096	0.01374	0.00056	0.037865	101.4	8.7	88	3.6	380	180	88	3.6	13.215
16To_12_5.FIN2	245.6	0.939	0.1162	0.0055	0.01708	0.00059	0.22192	111.5	5	109.2	3.7	185	94	109.2	3.7	2.06278
16To_12_6.FIN2	442	1.511	0.0724	0.0033	0.01107	0.00034	0.34173	70.9	3.1	71	2.2	64	81	71	2.2	0.141044
16To_12_7.FIN2	99.2	1.394	4.492	0.17	0.3038	0.0092	0.52109	1729	31	1709	46	1744	62	1744	62	2.00688
16To_12_8.FIN2	186.8	1.131	0.0933	0.0051	0.01338	0.00045	0.20275	90.8	4.8	85.7	2.9	204	110	85.7	2.9	5.61674
16To_12_9.FIN2	381	0.778	0.1832	0.0075	0.02645	0.00076	0.25945	170.6	6.4	168.3	4.8	182	80	168.3	4.8	1.34818
16To_12_10.FIN2	97.6	0.6691	0.0729	0.0056	0.0105	0.00036	0.073843	71	5.3	67.4	2.3	200	140	67.4	2.3	5.07042
16To_12_11.FIN2	153	1.581	0.082	0.0056	0.01231	0.00042	0.15942	79.7	5.2	78.8	2.7	140	120	78.8	2.7	1.12923
16To_12_12.FIN2	307.9	1.513	2.799	0.12	0.2273	0.0086	0.74731	1352	33	1318	45	1385	71	1385	71	4.83755
16To_12_13.FIN2	449	2.96	0.222	0.012	0.0324	0.0014	0.56428	202.6	9.6	205.8	9	199	92	205.8	9	1.57947
16To_12_14.FIN2	197.1	1.868	0.0867	0.0048	0.01363	0.0005	0.28747	84.5	4.5	87.3	3.2	16	98	87.3	3.2	3.31361
16To_12_15.FIN2	276.2	4.13	0.0887	0.0051	0.01422	0.00053	0.42933	87.1	4.8	91.2	3.3	-16	94	91.2	3.3	4.70723
16To_12_16.FIN2	67.6	1.857	0.0894	0.0079	0.01457	0.00068	0.2249	86.8	7.3	93.2	4.3	-20	150	93.2	4.3	7.37327
16To_12_17.FIN2	277.7	1.269	0.0967	0.0048	0.0143	0.00045	0.12294	93.6	4.5	91.6	2.9	167	100	91.6	2.9	2.13675
16To_12_18.FIN2	93.2	1.317	4.674	0.17	0.3143	0.0094	0.68053	1764	30	1761	46	1755	62	1755	62	0.34188
16To_12_19.FIN2	316.3	1.708	0.1594	0.0069	0.02278	0.00069	0.2204	150.4	6	145.2	4.3	238	86	145.2	4.3	3.45745
16To_12_20.FIN2	1370	1.773	0.0948	0.0044	0.01355	0.00052	0.48012	91.8	4.1	86.8	3.3	230	93	86.8	3.3	5.44662
16To_12_21.FIN2	311	23	0.612	0.035	0.0783	0.0052	0.66125	484	22	486	31	561	100	486	31	0.413223	Rim
16To_12_21.FIN2	139.4	1.775	1.612	0.06	0.1605	0.0047	0.33559	976	23	959	26	994	68	994	68	3.52113	Core
16To_12_22.FIN2	322	2.2	0.1119	0.0053	0.01542	0.00048	0.16058	107.5	4.8	98.6	3	296	97	98.6	3	8.27907
16To_12_23.FIN2	646	31.2	0.1978	0.011	0.02783	0.0011	0.6523	182.8	9.3	177	6.8	228	96	177	6.8	3.17287
16To_12_24.FIN2	168.2	2.74	0.089	0.0049	0.01331	0.00045	0.060104	87.1	4.5	85.2	2.9	116	100	85.2	2.9	2.1814
16To_12_25.FIN2	447	1.832	0.0746	0.0036	0.01119	0.00036	0.22504	73	3.4	71.7	2.3	123	91	71.7	2.3	1.78082
16To_12_26.FIN2	409	1.061	0.0865	0.004	0.01324	0.0004	0.37419	84.1	3.7	84.8	2.6	57	82	84.8	2.6	0.832342
16To_12_27.FIN2	403	1.081	0.4604	0.017	0.05998	0.0017	0.3672	384.1	12	375.4	10	409	75	375.4	10	2.26504
16To_12_28.FIN2	202	1.431	1.881	0.071	0.1735	0.0052	0.6334	1076	24	1034	28	1129	65	1129	65	8.41453
16To_12_29.FIN2	528	0.636	0.0942	0.0042	0.0133	0.00043	0.35155	91.3	3.9	85.2	2.7	256	89	85.2	2.7	6.68127
16To_12_30.FIN2	282	1.209	0.1608	0.0069	0.02295	0.00068	0.17803	151.1	6	146.2	4.3	213	85	146.2	4.3	3.24289
16To_12_31.FIN2	632	1.612	0.093	0.0044	0.0139	0.00041	0.021815	90.5	4	89	2.6	105	83	89	2.6	1.65746
16To_12_32.FIN2	375.3	1.345	0.0709	0.0034	0.01088	0.00033	0.25124	69.5	3.2	69.8	2.1	47	90	69.8	2.1	0.431655
16To_12_33.FIN2	129.1	1.537	4.26	0.15	0.2975	0.009	0.57316	1687	30	1680	44	1686	59	1686	59	0.355872
16To_12_34.FIN2	364.2	1.347	0.0942	0.0046	0.01425	0.00043	0.060962	91.8	4.2	91.2	2.8	118	92	91.2	2.8	0.653595
16To_12_35.FIN2	561	1.586	0.3077	0.012	0.04377	0.0013	0.43144	272.5	8.9	276.1	8	230	76	276.1	8	1.3211
16To_12_36.FIN2	338.5	1.23	0.1632	0.0069	0.02359	0.00072	0.24162	153.6	5.9	150.3	4.5	188	82	150.3	4.5	2.14844
16To_12_37.FIN2	259.5	1.151	0.1874	0.0095	0.0264	0.0011	0.50791	174.4	8	167.9	6.8	241	92	167.9	6.8	3.72706
16To_12_38.FIN2	3790	9.31	0.2917	0.013	0.0409	0.0017	0.73865	259.6	10	258.6	11	271	86	258.6	11	0.385208
16To_12_39.FIN2	109.5	1.267	1.653	0.064	0.1626	0.0046	0.36198	989	25	971.1	26	1028	71	1028	71	5.53502
16To_12_40.FIN2	253.7	1.848	0.0972	0.0058	0.01465	0.00057	0.36071	94.3	5.4	93.7	3.6	96	100	93.7	3.6	0.636267
16To_12_42.FIN2	744	1.201	0.0973	0.0041	0.01461	0.00045	0.34152	94.4	3.8	93.5	2.9	115	82	93.5	2.9	0.95339
16To_12_43.FIN2	537	1.774	0.1152	0.0052	0.0169	0.00059	0.44293	110.5	4.7	108	3.7	163	85	108	3.7	2.26244
16To_12_44.FIN2	251.2	1.021	0.86	0.039	0.1039	0.0036	0.65491	629	21	637	21	569	87	637	21	1.27186
16To_12_45.FIN2	424	1.228	0.541	0.023	0.0729	0.0025	0.61367	438.7	15	453.6	15	352	81	453.6	15	3.3964
16To_12_46.FIN2	1263	1.92	0.0994	0.004	0.01505	0.00047	0.42828	96.1	3.7	96.3	3	89	74	96.3	3	0.208117
16To_12_47.FIN2	870	1.262	0.0929	0.0077	0.0112	0.00048	0.3901	90.1	7.2	71.8	3.1	560	170	DISC	DISC	20.3108
16To_12_48.FIN2	179.9	0.978	0.0995	0.0069	0.01351	0.00046	0.00037069	95.9	6.3	86.5	2.9	310	130	86.5	2.9	9.80188
16To_12_49.FIN2	94.3	1.334	0.082	0.006	0.0128	0.00047	0.082336	79.6	5.6	82	3	40	130	82	3	3.01508
16To_12_50.FIN2	135.8	1.177	2.932	0.11	0.2404	0.0075	0.67624	1390	29	1390	38	1394	63	1394	63	0.286944
16To_12_51.FIN2	134.2	2.79	0.0673	0.0061	0.0113	0.00054	0.23295	65.7	5.8	72.4	3.5	-30	150	72.4	3.5	10.1979
16To_12_52.FIN2	151.3	0.74	0.1486	0.0082	0.02272	0.00086	0.37559	140.1	7.2	144.8	5.4	46	97	144.8	5.4	3.35475
16To_12_53.FIN2	496	1.303	0.0881	0.0042	0.0126	0.0004	0.19253	85.6	3.9	80.7	2.6	230	98	80.7	2.6	5.7243
16To_12_54.FIN2	70.8	0.985	0.1116	0.01	0.01322	0.00053	0.3317	106.5	9.2	84.6	3.3	570	170	DISC	DISC	20.5634
16To_12_55.FIN2	212.8	0.647	0.1689	0.0075	0.02611	0.00082	0.32529	158.1	6.5	166.1	5.2	56	84	166.1	5.2	5.06009
16To_12_56.FIN2	257	1.534	0.0953	0.0058	0.01428	0.00063	0.42712	92.1	5.3	91.4	4	92	100	91.4	4	0.760043
16To_12_57.FIN2	975	0.997	0.1539	0.0057	0.02256	0.00064	0.26357	145.2	5	143.8	4	152	73	143.8	4	0.964187
16To_12_58.FIN2	131.2	1.048	3.004	0.11	0.2435	0.0075	0.58396	1407	28	1406	38	1408	65	1408	65	0.142045
16To_12_59.FIN2	86.4	1.145	0.819	0.034	0.0974	0.003	0.28539	612	20	599.8	18	622	88	599.8	18	1.99346
16To_12_60.FIN2	136.4	2.282	0.1005	0.0067	0.01394	0.00051	0.20741	96.8	6.2	89.3	3.3	240	120	89.3	3.3	7.74793
16To_12_61.FIN2	218.5	0.916	0.2914	0.012	0.04054	0.0012	0.31871	259.7	9.7	256.1	7.7	260	87	256.1	7.7	1.38621
16To_12_62.FIN2	31.4	0.2179	6.82	0.27	0.2559	0.0083	0.48711	2086	35	1467	42	2772	55	DISC	DISC	47.0779
16To_12_63.FIN2	408.7	0.77	0.0776	0.0037	0.01178	0.00037	0.1934	75.8	3.5	75.5	2.3	146	92	75.5	2.3	0.395778
16To_12_64.FIN2	146.4	1.389	0.0813	0.0049	0.01205	0.00039	0.061179	79.1	4.6	77.2	2.5	164	110	77.2	2.5	2.40202
16To_12_65.FIN2	97.8	0.9	0.0728	0.0054	0.01227	0.00047	0.034229	71.4	5	78.6	3	-70	130	78.6	3	10.084
16To_12_66.FIN2	333	1.34	0.1109	0.005	0.01631	0.00049	0.066761	106.6	4.6	104.3	3.1	187	88	104.3	3.1	2.1576
16To_12_67.FIN2	154.2	1.41	4.222	0.17	0.2967	0.01	0.72329	1675	33	1673	51	1672	66	1672	66	0.0598086
16To_12_68.FIN2	571	1.395	0.1659	0.0074	0.02413	0.00078	0.33393	155.7	6.4	153.7	4.9	208	90	153.7	4.9	1.28452
16To_12_69.FIN2	300	2.21	0.086	0.0046	0.01258	0.00039	0.14375	84	4.4	80.7	2.5	198	110	80.7	2.5	3.92857
16To_12_72.FIN2	91.4	0.796	2.187	0.086	0.1998	0.0066	0.61387	1173	27	1173	35	1186	72	1186	72	1.09612
16To_12_74.FIN2	332	2.218	0.0765	0.004	0.01192	0.00041	0.22717	74.7	3.8	76.4	2.6	47	93	76.4	2.6	2.27577
16To_12_75.FIN2	132.7	2.182	1.994	0.075	0.1898	0.0058	0.31964	1113	26	1122	32	1123	71	1123	71	0.0890472
16To_12_76.FIN2	434	1.06	0.0748	0.0034	0.0112	0.00034	0.26684	73.4	3.2	71.8	2.2	130	85	71.8	2.2	2.17984
16To_12_77.FIN2	354	1.593	0.081	0.0045	0.0129	0.00053	0.51919	78.9	4.2	82.6	3.4	37	94	82.6	3.4	4.68948
16To_12_78.FIN2	905	1.98	0.2642	0.011	0.03749	0.0013	0.60345	237.5	9.1	237.2	8.3	262	82	237.2	8.3	0.126316
16To_12_79.FIN2	392	0.935	0.1802	0.0073	0.02611	0.00078	0.25522	168	6.3	166.1	4.9	206	83	166.1	4.9	1.13095
16To_12_80.FIN2	345	1.043	0.0738	0.0037	0.01104	0.00036	0.15379	72.2	3.5	70.8	2.3	125	96	70.8	2.3	1.93906
16To_12_81.FIN2	1150	2.3	0.268	0.014	0.0364	0.0017	0.70468	241.9	11	230.2	11	356	95	230.2	11	4.83671
16To_12_82.FIN2	379	2.1	0.292	0.012	0.04245	0.0013	0.4468	260.1	9.3	267.9	7.9	224	79	267.9	7.9	2.99885
16To_12_83.FIN2	325	1.083	0.0816	0.0043	0.01231	0.00039	0.12505	79.4	4	78.9	2.5	112	98	78.9	2.5	0.629723
16To_12_84.FIN2	304	3.96	0.102	0.0055	0.01488	0.00052	0.14183	98.9	5.2	95.2	3.3	223	110	95.2	3.3	3.74115
16To_12_85.FIN2	220.2	1.419	0.408	0.019	0.0532	0.0021	0.63684	346.4	13	334.8	13	445	88	334.8	13	3.34873
16To_12_86.FIN2	483.3	1.519	0.0728	0.0033	0.01148	0.00035	0.29336	71.5	3.1	73.6	2.3	16	80	73.6	2.3	2.93706
16To_12_87.FIN2	54.8	1.233	1.766	0.075	0.1748	0.0056	0.43027	1033	27	1038	31	1048	76	1048	76	0.954198
16To_12_88.FIN2	454	1.613	0.2737	0.011	0.03954	0.0012	0.29527	245.3	8.5	250	7.2	226	78	250	7.2	1.91602
16To_12_89.FIN2	636	1.353	0.0778	0.0035	0.01136	0.00034	0.12999	75.9	3.3	72.8	2.2	202	89	72.8	2.2	4.08432
16To_12_90.FIN2	218	3.95	2.256	0.11	0.2025	0.0074	0.88592	1198	34	1192	39	1220	66	1220	66	2.29508
16To_12_91.FIN2	263.1	1.504	0.0864	0.0046	0.01152	0.00039	0.2011	84.3	4.2	73.8	2.5	365	100	73.8	2.5	12.4555
16To_12_92.FIN2	368	1.428	0.0798	0.0039	0.01205	0.00036	0.14935	77.9	3.7	77.2	2.3	90	90	77.2	2.3	0.898588
16To_12_93.FIN2	282	1.033	0.0918	0.0048	0.01396	0.00049	0.296	89.2	4.4	89.4	3.1	115	98	89.4	3.1	0.224215
16To_12_94.FIN2	368	1.34	4.16	0.16	0.2935	0.0095	0.75057	1666	32	1662	47	1679	60	1679	60	1.01251
16To_12_95.FIN2	55.28	1.642	0.102	0.0089	0.01539	0.00057	0.13409	99.7	7.9	98.7	3.7	160	150	98.7	3.7	1.00301
16To_12_96.FIN2	492	3.01	4.551	0.18	0.308	0.011	0.71029	1738	33	1737	53	1744	61	1744	61	0.401376
16To_12_97.FIN2	168.8	1.401	0.528	0.022	0.0695	0.0021	0.32525	429	15	432.9	13	397	84	432.9	13	0.909091
16To_12_98.FIN2	585	0.726	0.173	0.0068	0.02485	0.00075	0.3919	161.8	5.9	158.2	4.7	221	79	158.2	4.7	2.22497
16To_12_99.FIN2	220.3	2.065	0.1832	0.0082	0.02748	0.00085	0.21867	170.8	6.9	174.7	5.3	135	85	174.7	5.3	2.28337
16To_12_100.FIN2	537	0.953	3.034	0.14	0.1833	0.0076	0.83327	1409	35	1086	42	1947	63	DISC	DISC	44.2219
16To_12_102.FIN2	702	52.4	0.585	0.023	0.0732	0.0025	0.55813	467.6	15	455.5	15	540	81	455.5	15	2.58768
16To_12_103.FIN2	810	0.47	0.0714	0.0031	0.01088	0.00033	0.21999	70	2.9	69.76	2.1	45	79	69.76	2.1	0.342857
16To_12_104.FIN2	401	2.981	0.0796	0.0042	0.01219	0.00048	0.38335	77.9	4	78.1	3	101	97	78.1	3	0.256739
16To_12_105.FIN2	632	3.12	0.0801	0.005	0.01245	0.00067	0.54491	78.1	4.7	79.8	4.3	62	110	79.8	4.3	2.1767	Rim
16To_12_105.FIN2	693	3.39	1.01	0.059	0.0769	0.0043	0.94524	708	29	480	25	1480	65	DISC	DISC	32.2034	Core
16To_12_106.FIN2	470	1.206	0.0684	0.0033	0.01068	0.00037	0.25662	67.1	3.1	68.5	2.4	54	86	68.5	2.4	2.08644
16To_12_107.FIN2	273.8	1.393	0.0947	0.0061	0.01314	0.00048	0.39392	91.7	5.6	84.2	3.1	320	120	84.2	3.1	8.17884
16To_12_108.FIN2	473	1.063	0.2687	0.01	0.03839	0.0011	0.31247	241.4	8.3	242.8	7	230	78	242.8	7	0.57995
16To_12_109.FIN2	155.5	0.425	0.197	0.014	0.02479	0.00092	0.3325	181	12	157.9	5.8	460	130	157.9	5.8	12.7624
16To_12_110.FIN2	354	0.863	0.0782	0.0042	0.01155	0.0004	0.2988	76.2	3.9	74	2.5	178	100	74	2.5	2.88714
16To_12_111.FIN2	173.4	2.034	0.1252	0.0066	0.01852	0.00059	0.080628	119.5	5.9	118.3	3.7	176	100	118.3	3.7	1.00418
16To_12_112.FIN2	356	1.294	0.1193	0.006	0.01743	0.00056	0.15922	114.2	5.4	111.4	3.5	158	97	111.4	3.5	2.45184
16To_12_113.FIN2	164.7	1.028	0.0608	0.0044	0.00944	0.00037	0.3151	60	4.2	60.6	2.4	70	120	60.6	2.4	1
16To_12_114.FIN2	62.6	1.764	0.0623	0.0054	0.00941	0.00039	0.026343	61.9	5.1	60.4	2.5	150	160	60.4	2.5	2.42326
16To_12_115.FIN2	687	1.233	0.085	0.0041	0.01176	0.0004	0.49429	82.7	3.9	75.3	2.6	258	91	75.3	2.6	8.948
16To_12_116.FIN2	239	1.381	0.1596	0.0071	0.02433	0.00075	0.25137	150.4	6.1	155	4.7	92	83	155	4.7	3.05851
16To_12_117.FIN2	379	1.184	0.0908	0.0061	0.01139	0.00051	0.36626	88.2	5.7	73	3.2	500	140	DISC	DISC	17.2336
16To_12_118.FIN2	565	4.41	0.2873	0.012	0.04087	0.0013	0.34186	256	9.2	258.2	8	228	81	258.2	8	0.859375
16To_12_119.FIN2	368	0.877	0.0905	0.0043	0.01436	0.00044	0.10662	87.8	4	91.9	2.8	32	89	91.9	2.8	4.6697
16To_12_120.FIN2	493	1.296	0.4547	0.017	0.06128	0.0018	0.52116	381.1	12	383.3	11	375	76	383.3	11	0.577276
16To_12_122.FIN2	204	2.359	0.0951	0.0055	0.01499	0.00054	0.42404	92	5.1	95.9	3.4	28	95	95.9	3.4	4.23913
16To_12_123.FIN2	153	0.582	3.419	0.13	0.2357	0.0073	0.5966	1511	29	1363	38	1726	62	1726	62	21.0313
16To_12_124.FIN2	115.6	1.316	0.1253	0.01	0.01829	0.00077	0.34315	120.4	9.3	116.8	4.9	170	150	116.8	4.9	2.99003
16To_12_125.FIN2	125.4	1.455	1.682	0.065	0.1686	0.005	0.62169	1002	24	1005	28	971	70	971	70	3.50154
16To_12_126.FIN2	223.3	0.483	0.1665	0.0076	0.02435	0.00072	0.16359	156.5	6.7	155.1	4.5	166	89	155.1	4.5	0.894569
16To_12_128.FIN2	438	1.622	0.3063	0.012	0.04113	0.0012	0.35144	271.3	9.3	260.1	7.6	324	80	260.1	7.6	4.12827
16To_12_131.FIN2	277	1.084	0.0662	0.0035	0.01024	0.00032	0.088079	65	3.3	65.7	2.1	85	100	65.7	2.1	1.07692
16To_12_132.FIN2	376	0.971	0.178	0.0079	0.0256	0.00086	0.36513	166.5	6.7	162.9	5.4	210	86	162.9	5.4	2.16216
GJ1_1.FIN2	393	45.1	0.804	0.033	0.0988	0.0035	0.52822	600	18	607	20	563	81	607	20	1.16667
GJ1_2.FIN2	368	46.3	0.844	0.034	0.0995	0.0035	0.56909	620	19	613	21	675	78	613	21	1.12903
GJ1_3.FIN2	377	46.1	0.837	0.034	0.0974	0.0033	0.49723	616	19	601	19	657	78	601	19	2.43506
GJ1_4.FIN2	387	44.4	0.791	0.031	0.0978	0.0036	0.56531	592.5	18	602	21	524	83	602	21	1.60338
GJ1_5.FIN2	396	47	0.789	0.035	0.0938	0.0033	0.57778	589	20	578	20	635	82	578	20	1.86757
GJ1_6.FIN2	380	45.5	0.812	0.034	0.0956	0.0035	0.62667	602	19	588	20	665	79	588	20	2.32558
GJ1_7.FIN2	392	44.9	0.771	0.032	0.0978	0.0037	0.51094	578	18	601	22	485	87	601	22	3.97924
GJ1_8.FIN2	373.6	45.1	0.831	0.035	0.0958	0.0031	0.4799	615	19	590	19	683	83	590	19	4.06504
GJ1_9.FIN2	385	46.7	0.783	0.035	0.0948	0.0034	0.55431	585	20	583	20	575	88	583	20	0.34188
GJ1_10.FIN2	399	46.6	0.768	0.035	0.0939	0.0038	0.6326	579	20	580	22	522	91	580	22	0.172712
GJ1_11.FIN2	371	46.1	0.851	0.036	0.0997	0.0037	0.6321	624	20	613	22	668	84	613	22	1.76282
GJ1_12.FIN2	388	47.2	0.817	0.034	0.1004	0.0041	0.53961	607	18	616	24	602	82	616	24	1.4827
GJ1_13.FIN2	385	45	0.827	0.033	0.0985	0.0036	0.61802	611	18	605	21	673	81	605	21	0.981997
GJ1_14.FIN2	383	45.4	0.802	0.033	0.0977	0.0037	0.5661	598	18	600	22	573	83	600	22	0.334448
GJ1_15.FIN2	384	45.6	0.807	0.034	0.0998	0.0039	0.69059	601	20	613	23	546	82	613	23	1.99667
GJ1_16.FIN2	386	46	0.804	0.035	0.0966	0.0037	0.61015	598	19	594	22	617	82	594	22	0.668896
GJ1_17.FIN2	382	46.1	0.823	0.034	0.1009	0.0038	0.48781	609	19	619	22	589	85	619	22	1.64204
GJ1_18.FIN2	385	45.2	0.815	0.033	0.1001	0.0036	0.58587	606	19	615	21	598	81	615	21	1.48515
GJ1_19.FIN2	384	46.2	0.797	0.032	0.0988	0.0035	0.58429	596.2	18	607	21	553	76	607	21	1.81147
GJ1_20.FIN2	385	46.2	0.81	0.033	0.0989	0.0035	0.59968	602	18	609	21	573	79	609	21	1.16279
GJ1_21.FIN2	382	45	0.807	0.032	0.0992	0.0036	0.5586	601	18	609	21	561	80	609	21	1.33111
GJ1_22.FIN2	386	46.9	0.807	0.032	0.0962	0.0032	0.51708	599	18	592	19	646	75	592	19	1.16861
GJ1_23.FIN2	385	45.5	0.791	0.033	0.0989	0.0035	0.63736	589	19	609	21	544	79	609	21	3.39559
GJ1_24.FIN2	382.1	44.6	0.829	0.034	0.0988	0.0033	0.57267	612	19	608	20	634	79	608	20	0.653595
GJ1_25.FIN2	386	45.9	0.798	0.033	0.098	0.0032	0.58675	594	18	602	19	585	78	602	19	1.3468
GJ1_26.FIN2	382	45.2	0.819	0.034	0.0998	0.0034	0.67877	606	19	613	20	601	76	613	20	1.15512
GJ1_27.FIN2	389	46.1	0.792	0.033	0.0959	0.0034	0.67094	591	19	590	20	582	79	590	20	0.169205
GJ1_28.FIN2	377	46.9	0.825	0.034	0.098	0.0035	0.52599	610	19	605	20	676	79	605	20	0.819672
GJ1_29.FIN2	385	44.1	0.821	0.033	0.0998	0.0036	0.59304	608	19	613	21	580	80	613	21	0.822368
GJ1_30.FIN2	386	44.8	0.805	0.032	0.098	0.0034	0.56954	600.1	18	602	20	618	77	602	20	0.316614
GJ1_31.FIN2	383	47.5	0.814	0.033	0.0978	0.0036	0.53988	606	18	601	21	641	79	601	21	0.825083
GJ1_32.FIN2	383	46.7	0.804	0.034	0.0968	0.0034	0.72852	600	19	595	20	614	77	595	20	0.833333
GJ1_33.FIN2	386	45.8	0.819	0.032	0.098	0.0035	0.59697	607.1	17	602	21	601	75	602	21	0.840059
GJ1_34.FIN2	383	45.7	0.811	0.034	0.096	0.0035	0.60472	604	19	590	21	699	79	590	21	2.31788
GJ1_35.FIN2	385	46.2	0.826	0.036	0.0978	0.0037	0.62603	611	20	602	22	648	82	602	22	1.473
GJ1_36.FIN2	383	46.6	0.804	0.032	0.0959	0.0034	0.54387	598.2	18	590	20	623	79	590	20	1.37078
GJ1_37.FIN2	386	46	0.799	0.033	0.0966	0.0034	0.65009	595	19	594	20	583	79	594	20	0.168067
GJ1_38.FIN2	382	44.5	0.815	0.033	0.0985	0.0035	0.43614	605	19	605	20	580	86	605	20	0
GJ1_39.FIN2	386	46.3	0.788	0.032	0.0969	0.0035	0.51121	590	18	596	20	543	84	596	20	1.01695
GJ1_40.FIN2	383	45.2	0.81	0.034	0.0973	0.0035	0.63058	602	19	599	21	588	80	599	21	0.498339
GJ1_41.FIN2	384	45.5	0.81	0.033	0.0966	0.0035	0.58346	600	18	595	20	604	84	595	20	0.833333
GJ1_42.FIN2	385	44.8	0.797	0.033	0.0954	0.0033	0.53563	596	19	587	20	611	80	587	20	1.51007
GJ1_43.FIN2	384	46.4	0.81	0.033	0.0972	0.0034	0.56927	604	18	598	20	633	78	598	20	0.993377
GJ1_44.FIN2	384	46.1	0.82	0.034	0.0973	0.0035	0.56695	608	19	600	21	619	80	600	21	1.31579
GJ1_45.FIN2	385	45.9	0.812	0.034	0.0964	0.0036	0.62786	604	19	593	21	614	75	593	21	1.82119
GJ1_46.FIN2	383	46.1	0.804	0.034	0.0963	0.0034	0.55601	598	19	595	20	587	82	595	20	0.501672
GJ1_47.FIN2	384	44.9	0.8	0.033	0.0963	0.0034	0.55925	596	18	592	20	590	81	592	20	0.671141
GJ1_48.FIN2	384	47.3	0.789	0.033	0.0988	0.0035	0.47927	591	19	608	20	538	87	608	20	2.87648
GJ1_49.FIN2	384	46.7	0.803	0.033	0.0954	0.0034	0.48403	598	18	587	20	657	79	587	20	1.83946
GJ1_50.FIN2	385	45.1	0.818	0.032	0.0983	0.0035	0.64357	606.5	18	604	20	628	74	604	20	0.412201
GJ1_51.FIN2	383	46	0.841	0.033	0.1021	0.0035	0.59752	619.9	18	628	20	607	79	628	20	1.30666
GJ1_53.FIN2	385	44.4	0.803	0.032	0.097	0.0033	0.54608	598	18	597	19	630	78	597	19	0.167224
GJ1_54.FIN2	385	46.4	0.808	0.032	0.0989	0.0034	0.47624	602.7	19	608	20	609	79	608	20	0.879376
GJ1_55.FIN2	381	45.7	0.828	0.032	0.0999	0.0035	0.46999	616.2	18	613	21	619	81	613	21	0.519312
GJ1_56.FIN2	387	46.8	0.806	0.033	0.0959	0.0037	0.6376	600	18	589	21	640	78	589	21	1.83333
GJ1_57.FIN2	383	45.3	0.799	0.031	0.0986	0.0033	0.55271	594.9	18	606	20	569	76	606	20	1.86586
GJ1_58.FIN2	384	46	0.805	0.032	0.0977	0.0032	0.59311	599	18	600	19	605	79	600	19	0.166945
GJ1_59.FIN2	384	45.1	0.801	0.032	0.0963	0.0032	0.5969	598.8	18	592	19	621	77	592	19	1.1356
GJ1_60.FIN2	387	45.2	0.815	0.033	0.0981	0.0035	0.44909	606	19	603	20	585	78	603	20	0.49505
GJ1_61.FIN2	378	46.2	0.817	0.033	0.0984	0.0033	0.50501	606	19	605	19	558	83	605	19	0.165017
GJ1_62.FIN2	387	45.3	0.823	0.033	0.0972	0.0034	0.62664	608	18	599	20	620	73	599	20	1.48026
GJ1_63.FIN2	387	46.1	0.799	0.031	0.0966	0.0032	0.62944	597.7	18	594	19	611	75	594	19	0.61904
GJ1_64.FIN2	380.6	46.1	0.805	0.032	0.0978	0.0035	0.65359	601.2	18	601	20	582	77	601	20	0.0332668
Pak1_1.FIN2	100.7	1.297	0.0498	0.0046	0.00758	0.00033	0.14269	49	4.4	48.7	2.1	70	160	48.7	2.1	0.612245
Pak1_2.FIN2	160.5	1.133	0.0518	0.004	0.00716	0.0003	0.22354	51.4	3.8	46	1.9	330	140	46	1.9	10.5058
Pak1_3.FIN2	133.6	1.324	0.0402	0.0033	0.00765	0.00031	0.082268	39.9	3.2	49.1	2	-250	130	DISC	DISC	23.0576
Pak1_4.FIN2	137.4	1.324	0.0435	0.0038	0.00716	0.00032	0.29746	43	3.7	46	2.1	-20	140	46	2.1	6.97674
Pak1_5.FIN2	135.2	1.376	0.0471	0.0039	0.0069	0.00028	0.286	46.5	3.7	44.3	1.8	210	150	44.3	1.8	4.73118
Pak1_6.FIN2	135	1.28	0.0406	0.0038	0.00767	0.00034	0.20532	40.1	3.7	49.2	2.1	-270	130	DISC	DISC	22.6933
Pak1_7.FIN2	160.5	1.252	0.0448	0.0034	0.00785	0.00044	0.38236	44.3	3.3	50.4	2.8	-130	120	50.4	2.8	13.7698
Plesovice_1.FIN2	808	7.79	0.395	0.016	0.0541	0.0019	0.63873	337.9	11	339.5	12	308	80	339.5	12	0.473513
Plesovice_2.FIN2	812	8.08	0.394	0.016	0.0532	0.0018	0.5686	337.2	11	333.9	11	362	79	333.9	11	0.978648
Plesovice_3.FIN2	683	8.58	0.3895	0.016	0.0533	0.0018	0.55639	333.3	12	335.4	11	348	81	335.4	11	0.630063
Plesovice_4.FIN2	900	7.27	0.3978	0.015	0.0527	0.0018	0.44728	339.5	11	330.9	11	401	82	330.9	11	2.53314
Plesovice_5.FIN2	1000	7.03	0.39	0.016	0.0524	0.0019	0.63998	334.8	12	329.1	11	369	79	329.1	11	1.70251
Plesovice_6.FIN2	1026	6.88	0.4015	0.017	0.0538	0.0019	0.60989	341.9	12	337.9	11	393	76	337.9	11	1.16993
Plesovice_7.FIN2	890	7.07	0.3884	0.015	0.0527	0.0018	0.57556	333.2	11	331.9	11	353	79	331.9	11	0.390156

## Sheet: 16TO07,11
Sample Name:				2σ Prop		2σ Prop		207/235	2σ Prop	206/238	2σ Prop	207/206	2σ Prop	Best age	2σ Prop
Grain #	[U] ppm	U/Th	207/235	error	206/238	error	RHO	Age Ma	error	Age (Ma)	error	Age (Ma)	error	(Ma)	error	% Discordance*	Rim/Core
16TO-07_2.FIN2	242.9	2.741	0.1011	0.0051	0.01503	0.00042	0.24319	97.4	4.7	96.1	2.7	139	95	96.1	2.7	1.3347
16TO-07_3.FIN2	453	1.7	0.644	0.028	0.0764	0.0032	0.57339	503	17	474	19	547	84	474	19	5.76541	Rim
16TO-07_3.FIN2	270	1.321	1.633	0.062	0.1456	0.0044	0.50627	990	21	876	24	1217	52	1217	52	28.0197	Core
16TO-07_4.FIN2	139.7	2.375	3.172	0.079	0.2606	0.0061	0.55269	1450	19	1491	31	1391	41	1391	41	7.18907
16TO-07_5.FIN2	79.5	1.147	13.68	0.32	0.5237	0.012	0.60378	2724	22	2712	51	2733	32	2733	32	0.768386
16TO-07_6.FIN2	134	1.482	4.22	0.13	0.2978	0.0087	0.4061	1678	25	1679	43	1621	52	1621	52	3.57804
16TO-07_7.FIN2	180.5	1.264	0.1189	0.0073	0.01725	0.00051	0.16341	113.8	6.6	110.2	3.3	220	130	110.2	3.3	3.16344
16TO-07_8.FIN2	62	1.091	0.091	0.014	0.01291	0.00065	0.10093	89	13	82.7	4.1	300	290	82.7	4.1	7.07865
16TO-07_9.FIN2	187.9	0.725	0.0933	0.005	0.0138	0.00038	0.17985	90.2	4.7	88.4	2.4	130	100	88.4	2.4	1.99557
16TO-07_10.FIN2	196	1.038	0.0881	0.0058	0.01163	0.00038	0.044878	85.5	5.4	74.5	2.4	390	140	74.5	2.4	12.8655
16TO-07_11.FIN2	15.69	12.3	2.75	0.13	0.2336	0.0083	0.54204	1351	36	1350	44	1375	78	1375	78	1.81818
16TO-07_12.FIN2	98.1	0.78	3.116	0.08	0.251	0.0062	0.52288	1438	20	1443	32	1462	45	1462	45	1.29959
16TO-07_13.FIN2	458.7	0.936	0.171	0.0058	0.02519	0.00059	0.44878	160.5	5.1	160.4	3.7	172	63	160.4	3.7	0.0623053
16TO-07_14.FIN2	414	2.205	0.0813	0.0048	0.01172	0.00051	0.40854	79.1	4.5	75.1	3.2	130	110	75.1	3.2	5.05689
16TO-07_15.FIN2	460	3.611	2.481	0.057	0.2132	0.0054	0.61993	1265	17	1245	29	1323	40	1323	40	5.89569
16TO-07_17.FIN2	116.1	1.999	0.112	0.011	0.01723	0.00075	0.097277	108.4	9.4	110.1	4.7	170	180	110.1	4.7	1.56827
16TO-07_18.FIN2	777	1.568	0.1857	0.0053	0.02715	0.00068	0.4525	172.7	4.6	172.7	4.3	184	57	172.7	4.3	0
16TO-07_19.FIN2	364.2	1.481	0.1213	0.0051	0.0179	0.00044	0.35026	116	4.6	114.6	2.7	189	83	114.6	2.7	1.2069
16TO-07_21.FIN2	125	0.647	0.079	0.0062	0.01217	0.00037	0.068834	78.3	5.7	78	2.4	120	140	78	2.4	0.383142
16TO-07_22.FIN2	367	1.848	0.1034	0.0053	0.01377	0.00043	0.3542	99.6	4.9	88.1	2.7	361	100	88.1	2.7	11.5462
16TO-07_23.FIN2	262	1.765	3.345	0.1	0.2624	0.0087	0.61453	1498	24	1498	44	1471	50	1471	50	1.83549
16TO-07_24.FIN2	331.2	2.002	0.0991	0.0057	0.01497	0.00049	0.31454	95.7	5.3	95.8	3.1	112	100	95.8	3.1	0.104493
16TO-07_25.FIN2	506	1.59	0.0887	0.0043	0.01286	0.00045	0.336	86.2	4	82.3	2.9	193	89	82.3	2.9	4.52436
16TO-07_26.FIN2	220	0.669	0.166	0.007	0.02428	0.00064	0.31084	156	6	154.7	4	135	78	154.7	4	0.833333
16TO-07_27.FIN2	606	1.263	0.3038	0.009	0.03955	0.0011	0.4671	269.5	6.9	250	6.7	422	63	250	6.7	7.23562
16TO-07_28.FIN2	135.2	4.06	1.629	0.045	0.1679	0.0043	0.52354	982	17	999	24	920	52	920	52	8.58696
16TO-07_29.FIN2	138.3	0.959	3.098	0.082	0.2496	0.0067	0.57677	1429	20	1434	35	1413	48	1413	48	1.4862
16TO-07_30.FIN2	40.7	0.604	0.173	0.014	0.02604	0.00073	0.11235	161	12	165.7	4.6	120	150	165.7	4.6	2.91925
16TO-07_31.FIN2	229.1	0.476	0.227	0.0086	0.03099	0.0009	0.49099	207.9	7.2	196.7	5.6	309	74	196.7	5.6	5.38721
16TO-07_32.FIN2	425	1.605	0.0971	0.0037	0.01449	0.00033	0.0019329	94	3.4	92.7	2.1	129	82	92.7	2.1	1.38298
16TO-07_33.FIN2	812	3.353	0.1772	0.0052	0.02592	0.00069	0.37262	165.4	4.5	164.9	4.3	184	61	164.9	4.3	0.302297
16TO-07_35.FIN2	298.4	2.213	0.0723	0.0036	0.01103	0.00035	0.28241	70.7	3.4	70.7	2.2	71	91	70.7	2.2	0
16TO-07_37.FIN2	327	1.929	0.166	0.0055	0.02437	0.0006	0.29172	155.7	4.8	155.2	3.8	177	67	155.2	3.8	0.32113
16TO-07_38.FIN2	162.5	1.822	0.1009	0.0058	0.01483	0.0006	0.012106	97.8	5.4	94.9	3.8	190	100	94.9	3.8	2.96524
16TO-07_39.FIN2	349	1.82	0.0867	0.0042	0.01245	0.00043	0.49113	84.2	3.9	79.7	2.7	145	83	79.7	2.7	5.34442
16TO-07_41.FIN2	628	1.299	0.1604	0.0048	0.02316	0.00054	0.345	150.9	4.2	147.6	3.4	249	62	147.6	3.4	2.18688
16TO-07_42.FIN2	221	2.422	0.0843	0.005	0.01171	0.00038	0.29333	83	4.7	75	2.4	300	120	75	2.4	9.63855
16TO-07_43.FIN2	178.7	3.41	0.393	0.014	0.0541	0.0014	0.46172	335.5	10	339.8	8.5	289	66	339.8	8.5	1.28167
16TO-07_44.FIN2	251	1.196	3.155	0.07	0.2521	0.0057	0.71829	1444	17	1448	29	1431	32	1431	32	1.18798
16TO-07_45.FIN2	534	1.364	4.12	0.12	0.294	0.0095	0.44394	1657	22	1659	47	1648	55	1648	55	0.667476
16TO-07_46.FIN2	417	1.972	0.0793	0.0037	0.01176	0.0004	0.4133	77.4	3.4	75.4	2.5	168	86	75.4	2.5	2.58398
16TO-07_47.FIN2	115.7	0.777	0.172	0.012	0.02492	0.001	0.024033	161	10	158.6	6.5	170	150	158.6	6.5	1.49068
16TO-07_48.FIN2	387	1.285	0.082	0.0039	0.01226	0.00037	0.2099	79.8	3.6	78.5	2.4	170	100	78.5	2.4	1.62907
16TO-07_49.FIN2	624.2	2.451	0.623	0.013	0.0775	0.0016	0.41368	492	8.3	481.1	9.8	540	45	481.1	9.8	2.21545
16TO-07_50.FIN2	258	2.256	0.636	0.025	0.0799	0.0035	0.59114	497	16	494	21	520	79	494	21	0.603622
16TO-07_51.FIN2	1047	1.037	0.0609	0.0023	0.00926	0.00025	0.40888	60.2	2.2	59.4	1.6	74	69	59.4	1.6	1.3289
16TO-07_53.FIN2	676	6.5	4.329	0.11	0.3042	0.0081	0.75956	1699	22	1710	40	1653	37	1653	37	3.44828
16TO-07_54.FIN2	449	1.872	3.81	0.16	0.267	0.013	0.46153	1584	35	1528	69	1733	81	1733	81	11.8292
16TO-07_55.FIN2	852	0.872	0.0949	0.0064	0.01346	0.00082	0.613	91.9	5.9	86.2	5.2	270	130	86.2	5.2	6.20239
16TO-07_56.FIN2	338	1.583	0.0732	0.0036	0.01121	0.0004	0.28569	72	3.4	71.9	2.6	110	97	71.9	2.6	0.138889
16TO-07_57.FIN2	187	2.56	4.02	0.12	0.2875	0.009	0.85147	1633	27	1629	45	1598	41	1598	41	1.93992
16TO-07_58.FIN2	213	1.37	0.0833	0.0059	0.012	0.00052	0.39986	80.8	5.6	76.9	3.3	190	130	76.9	3.3	4.82673
16TO-07_59.FIN2	153.7	3.939	12.81	0.26	0.5281	0.011	0.61048	2663	19	2734	45	2620	26	2620	26	4.35115
16TO-07_60.FIN2	486.9	1.404	0.3136	0.0073	0.04343	0.00091	0.43926	277.6	5.6	274	5.6	284	44	274	5.6	1.29683
16TO-07_61.FIN2	219	0.956	0.0855	0.0067	0.01192	0.00055	0.20864	83.1	6.3	76.4	3.5	340	160	76.4	3.5	8.06258
16TO-07_62.FIN2	91.4	1.258	6.96	0.21	0.3922	0.011	0.55676	2105	27	2134	51	2058	50	2058	50	3.69291
16TO-07_63.FIN2	430	3.51	0.097	0.005	0.01447	0.00063	0.45834	94.2	4.7	92.6	4	163	96	92.6	4	1.69851
16TO-07_64.FIN2	273.4	2.728	0.204	0.008	0.03003	0.00083	0.3387	188.1	6.7	191.2	5.3	142	75	191.2	5.3	1.64806
16TO-07_65.FIN2	525	8.05	3.909	0.087	0.2595	0.0063	0.71593	1616	18	1486	32	1793	31	1793	31	17.1221
16TO-07_66.FIN2	196.4	1.097	0.562	0.016	0.0726	0.0018	0.27607	454.4	11	451.5	11	445	61	451.5	11	0.638204
16TO-07_67.FIN2	607	1.584	0.3125	0.0083	0.04198	0.001	0.45442	275.7	6.5	265	6.3	362	52	265	6.3	3.88103
16TO-07_68.FIN2	476	1.392	0.2984	0.0093	0.0419	0.0013	0.55889	264.5	7.3	264.5	7.8	270	57	264.5	7.8	0
16TO-07_69.FIN2	635	3.2	0.0824	0.004	0.01237	0.00052	0.34408	80.6	3.7	79.3	3.3	120	100	79.3	3.3	1.6129
16TO-07_70.FIN2	449	3.14	2.683	0.092	0.2232	0.008	0.57483	1323	26	1297	42	1358	58	1358	58	4.4919
16TO-07_71.FIN2	142.5	0.955	0.218	0.014	0.02442	0.00097	0.2726	201	11	155.5	6.1	810	120	DISC	DISC	22.6368
16TO-07_72.FIN2	1160	2.79	0.0932	0.0039	0.01307	0.00039	0.14772	90.3	3.7	83.7	2.5	232	92	83.7	2.5	7.30897
16TO-07_73.FIN2	101.4	0.78	0.199	0.013	0.0245	0.0013	0.42547	186	12	155.8	8.3	530	130	DISC	DISC	16.2366
16TO-07_74.FIN2	226.2	1.627	0.495	0.018	0.0647	0.0023	0.4855	409	12	404	14	395	83	404	14	1.22249
16TO-07_75.FIN2	115.6	0.728	2.838	0.081	0.2281	0.0062	0.61616	1366	20	1323	33	1412	47	1412	47	6.30312
16TO-07_76.FIN2	68.5	1.322	0.0712	0.0088	0.01067	0.00054	0.19296	68.8	8.3	68.4	3.4	110	200	68.4	3.4	0.581395
16TO-07_77.FIN2	634	1.325	0.0935	0.0035	0.0144	0.00044	0.30221	90.6	3.3	92.4	2.8	34	74	92.4	2.8	1.98675
16TO-07_78.FIN2	148.4	1.1	0.263	0.014	0.0376	0.0014	0.36636	235	11	237.6	8.5	218	95	237.6	8.5	1.10638
16TO-07_79.FIN2	1434	1.011	0.2283	0.0084	0.02903	0.00095	0.54878	209.3	6.8	184.4	6	532	78	184.4	6	11.8968
16TO-07_80.FIN2	783	1.97	0.1057	0.0043	0.01536	0.0005	0.31749	101.9	3.9	98.2	3.2	150	86	98.2	3.2	3.63101
16TO-07_81.FIN2	219	1.63	3.95	0.12	0.2873	0.0091	0.71757	1627	26	1625	45	1645	45	1645	45	1.21581
16TO-07_82.FIN2	113.5	2.138	0.508	0.025	0.02118	0.00061	0.26191	417	17	135.1	3.8	2584	80	DISC	DISC	67.6019
16TO-07_83.FIN2	138.4	0.964	0.1038	0.0063	0.01512	0.00062	0.055448	99.8	5.8	96.7	3.9	150	130	96.7	3.9	3.10621
16TO-07_84.FIN2	247	4.63	4.074	0.11	0.2902	0.009	0.62245	1646	21	1642	44	1660	48	1660	48	1.08434
16TO-07_85.FIN2	40.4	3.401	2.166	0.063	0.199	0.0048	0.27244	1167	21	1171	26	1129	61	1129	61	3.72011
16TO-07_86.FIN2	84.6	0.842	0.106	0.018	0.01271	0.00096	0.29815	101	16	81.4	6.1	640	330	DISC	DISC	19.4059
16TO-07_87.FIN2	87.2	1.188	5.15	0.16	0.3312	0.01	0.65171	1847	26	1845	49	1881	45	1881	45	1.91388
16TO-07_88.FIN2	283.9	2.322	0.1102	0.0053	0.01583	0.00058	0.25224	105.8	4.9	101.2	3.7	190	100	101.2	3.7	4.34783
16TO-07_89.FIN2	133.9	1.488	0.0666	0.0047	0.01071	0.00039	0.15716	65.2	4.5	68.7	2.5	-50	120	68.7	2.5	5.3681
16TO-07_90.FIN2	385	1.64	0.0709	0.0048	0.01035	0.00046	0.46428	70.6	4.8	66.4	2.9	170	110	66.4	2.9	5.94901
16TO-07_91.FIN2	127.9	1.81	0.0903	0.0062	0.01245	0.00056	0.17065	87.3	5.8	79.8	3.6	300	140	79.8	3.6	8.59107
16TO-07_92.FIN2	184.3	1.159	0.157	0.014	0.01862	0.00077	0.14191	147	13	118.9	4.9	660	200	DISC	DISC	19.1156
16TO-07_93.FIN2	170.8	1.189	0.086	0.0055	0.01254	0.00041	0.20637	84.8	5.2	80.3	2.6	150	120	80.3	2.6	5.3066
16TO-07_94.FIN2	644	2.53	0.0801	0.0035	0.01175	0.00039	0.43711	78.1	3.3	75.3	2.5	177	83	75.3	2.5	3.58515
16TO-07_96.FIN2	100	1.429	0.0902	0.0075	0.01166	0.00046	0.31287	87.6	7	74.7	3	430	140	74.7	3	14.726
16TO-07_97.FIN2	160.2	2.62	4.15	0.12	0.2944	0.0099	0.58873	1657	24	1659	49	1663	52	1663	52	0.240529
16TO-07_98.FIN2	332	1.577	0.0824	0.0042	0.0125	0.00045	0.28461	80.7	3.8	80	2.8	130	100	80	2.8	0.86741
16TO-07_99.FIN2	648	8.06	0.572	0.023	0.0733	0.0032	0.67755	456	15	455	19	514	74	455	19	0.219298
16TO-07_100.FIN2	788	1.563	0.1914	0.0073	0.028	0.0011	0.60572	177.5	6.2	178	6.7	157	69	178	6.7	0.28169
16TO-07_101.FIN2	888	1.173	0.0664	0.003	0.01	0.00033	0.24464	65.5	2.8	64.1	2.1	113	92	64.1	2.1	2.1374
16TO-07_102.FIN2	673	1.249	0.1222	0.0041	0.01812	0.00057	0.41215	116.9	3.7	115.8	3.6	148	73	115.8	3.6	0.940975
16TO-07_103.FIN2	248.6	1.35	0.442	0.017	0.0583	0.0018	0.47784	372	11	364.8	11	388	71	364.8	11	1.93548
16TO-07_104.FIN2	249	1.512	0.847	0.036	0.0944	0.0049	0.56448	627	18	581	29	769	96	581	29	7.33652
16TO-07_105.FIN2	345	1.22	0.0971	0.0056	0.0153	0.00049	0.23673	94.6	5.1	97.9	3.1	80	100	97.9	3.1	3.48837
16TO-07_106.FIN2	266.3	1.575	0.1074	0.0057	0.01528	0.00045	0.21643	103.8	5.3	97.8	2.8	250	100	97.8	2.8	5.78035
16TO-07_107.FIN2	364	1.998	0.0758	0.0038	0.0113	0.00031	0.30198	74	3.5	72.4	2	138	93	72.4	2	2.16216
16TO-07_108.FIN2	311	1.762	0.1052	0.0056	0.01492	0.00039	0.11951	101.7	5.2	95.5	2.5	220	110	95.5	2.5	6.09636
16TO-07_109.FIN2	89.4	2.38	4.26	0.13	0.2995	0.0079	0.041583	1680	26	1687	39	1655	50	1655	50	1.93353
16TO-07_110.FIN2	369	1.915	0.573	0.015	0.0737	0.0017	0.42479	459.8	9.7	458	10	458	55	458	10	0.391475
16TO-07_111.FIN2	564	1.276	0.196	0.012	0.0269	0.0012	0.17087	182.5	9.5	170.8	7.4	270	130	170.8	7.4	6.41096
16TO-07_112.FIN2	536	4.33	0.624	0.034	0.0789	0.004	0.36494	490	21	489	24	450	130	489	24	0.204082
16TO-07_113.FIN2	239.4	1.666	0.0852	0.0081	0.01232	0.00056	0.043051	82.7	7.6	78.9	3.6	250	210	78.9	3.6	4.59492
16TO-07_114.FIN2	156.3	0.49	0.186	0.011	0.02357	0.00095	0.29166	173.7	9.6	150.1	6	470	130	150.1	6	13.5866
16TO-07_115.FIN2	606	3.92	0.0972	0.0041	0.01453	0.00045	0.32347	94	3.8	93	2.9	122	83	93	2.9	1.06383
16TO-07_116.FIN2	137.5	1.74	4.019	0.11	0.2866	0.0081	0.59461	1639	21	1622	40	1648	41	1648	41	1.57767
16TO-07_117.FIN2	756	0.605	0.0724	0.0029	0.01073	0.00032	0.34789	70.9	2.8	68.8	2	148	78	68.8	2	2.96192
16TO-07_118.FIN2	321.2	1.308	0.0943	0.0049	0.01361	0.00043	0.26358	91.8	4.4	87.1	2.7	210	100	87.1	2.7	5.11983
16TO-07_119.FIN2	333	2.95	1.794	0.04	0.177	0.0042	0.56804	1041	15	1054	23	1006	42	1006	42	4.77137
16TO-07_120.FIN2	299.1	1.992	0.305	0.018	0.0409	0.0019	0.28685	269	14	260	11	340	130	260	11	3.34572
16TO-07_121.FIN2	211.8	1.222	0.0811	0.0052	0.01175	0.0005	0.055831	79.1	4.8	75.3	3.2	190	150	75.3	3.2	4.80405
16TO-07_122.FIN2	59.3	0.652	0.174	0.013	0.02548	0.001	0.22583	162	11	162.1	6.3	180	140	162.1	6.3	0.0617284
16TO-07_123.FIN2	693	3.29	0.1635	0.0089	0.0123	0.00055	0.70109	153.1	7.7	78.8	3.5	1487	73	DISC	DISC	48.5304
16TO-07_124.FIN2	497	4.4	0.0828	0.0033	0.01244	0.00036	0.46235	81.3	3	79.7	2.3	121	78	79.7	2.3	1.96802
16TO-07_125.FIN2	145.2	1.456	0.0931	0.0064	0.01411	0.00041	0.15663	89.9	5.9	90.3	2.6	80	120	90.3	2.6	0.444939
16TO-07_126.FIN2	240.5	1.624	2.999	0.063	0.2415	0.005	0.52797	1405	16	1394	26	1422	35	1422	35	1.96906
16TO-07_127.FIN2	854	4.04	1.47	0.049	0.1443	0.0049	0.77774	921	20	868	28	1025	43	1025	43	15.3171
16TO-07_128.FIN2	836	1.088	0.1941	0.0063	0.02766	0.00072	0.30451	179.9	5.3	175.9	4.5	194	68	175.9	4.5	2.22346
16TO-07_129.FIN2	140.1	1.651	0.144	0.012	0.01684	0.0005	0.39655	136	10	107.6	3.2	620	160	DISC	DISC	20.8824
16TO-07_130.FIN2	702	1.073	0.0984	0.0031	0.01413	0.00042	0.41342	95.2	2.9	90.4	2.7	216	67	90.4	2.7	5.04202
16TO-11_1.FIN2	586	1.584	0.0786	0.0044	0.01193	0.00044	0.14483	76.7	4.1	76.4	2.8	160	120	76.4	2.8	0.391134
16TO-11_2.FIN2	408	0.845	0.1834	0.0075	0.0245	0.00056	0.26536	170.6	6.5	156	3.5	355	87	156	3.5	8.55803
16TO-11_3.FIN2	526	1.89	0.0919	0.0035	0.01403	0.00033	0.22639	89.2	3.3	90	2.1	79	72	90	2.1	0.896861
16TO-11_4.FIN2	207	1.93	0.055	0.0046	0.00918	0.00027	0.2557	54.2	4.4	58.9	1.7	-40	140	58.9	1.7	8.67159
16TO-11_5.FIN2	224.2	1.424	0.273	0.0093	0.03923	0.00083	0.18143	245.5	7.6	248	5.2	219	75	248	5.2	1.01833
16TO-11_6.FIN2	81.5	0.714	3.213	0.08	0.2524	0.0067	0.52265	1458	19	1450	34	1483	40	1483	40	2.22522
16TO-11_7.FIN2	338.5	1.144	0.0969	0.0043	0.01351	0.00033	0.14235	93.8	4	86.5	2.1	290	94	86.5	2.1	7.78252
16TO-11_8.FIN2	219.8	2.42	3.9	0.17	0.266	0.013	0.70106	1617	38	1521	66	1709	52	1709	52	11.0006
16TO-11_9.FIN2	587	1.949	0.2923	0.0089	0.04124	0.0011	0.17887	260.1	7	260.5	6.6	269	73	260.5	6.6	0.153787
16TO-11_10.FIN2	520	1.207	0.2307	0.0065	0.0344	0.00085	0.41207	211	5.4	218	5.3	144	56	218	5.3	3.31754
16TO-11_11.FIN2	210.1	1.507	0.1599	0.0067	0.02333	0.00057	0.13602	151.2	5.9	148.7	3.6	172	80	148.7	3.6	1.65344
16TO-11_12.FIN2	178.5	1.65	3.045	0.075	0.2464	0.0068	0.56309	1415	19	1418	35	1386	44	1386	44	2.3088
16TO-11_13.FIN2	441	2.186	0.0742	0.003	0.01128	0.00025	0.22085	73.1	2.9	72.3	1.6	112	76	72.3	1.6	1.09439
16TO-11_14.FIN2	389	0.958	0.59	0.014	0.0758	0.0016	0.23035	470.1	8.6	470.6	9.5	448	53	470.6	9.5	0.10636
16TO-11_15.FIN2	335.8	1.036	0.193	0.0076	0.02788	0.00057	0.041967	178.8	6.4	177.3	3.6	194	86	177.3	3.6	0.838926
16TO-11_16.FIN2	202.4	1.828	3.116	0.067	0.2486	0.0049	0.57998	1435	16	1431	25	1462	33	1462	33	2.12038
16TO-11_17.FIN2	265	2.74	0.0807	0.0054	0.01277	0.0005	0.16563	78.7	5.1	81.8	3.2	110	120	81.8	3.2	3.93901
16TO-11_18.FIN2	565	3.79	0.554	0.013	0.0717	0.0016	0.45308	447.5	8.6	446.3	9.7	453	48	446.3	9.7	0.268156
16TO-11_19.FIN2	278.7	2.136	0.0846	0.0038	0.01257	0.00032	0.21575	82.3	3.6	80.5	2	113	90	80.5	2	2.18712
[truncated: 185 more rows]

## Sheet: 16TO09,13a
Sample Name:				2σ Prop		2σ Prop		207/235	2σ Prop	206/238	2σ Prop	207/206	2σ Prop	Best age	2σ Prop
[truncated: 330 more rows]

[truncated: 9 more sheets: 16TO10,14, 16TO15,16, 16TO17,18, 16TO19,20, 16TO21, 16TO22, 18TO01,05, 18TO02,03, 18TO04,06]
