# Supplementary material
Source: publisher figshare collection journal article supplement (https://gsapubs.figshare.com/articles/dataset/_/23787267)
Supplement: Supplementary file 5 [file 1]

Kortyna, C., Stockli, D.F., Lawton, T.F., Covault, J.A., and Sharman, G.R., 2023, Impact of Mexican Border rift structural inheritance on Laramide rivers of the Tornillo basin, west Texas: Insights from detrital zircon provenance: *Geosphere*, v. 19, <https://doi.org/10.1130/GES02516.1>

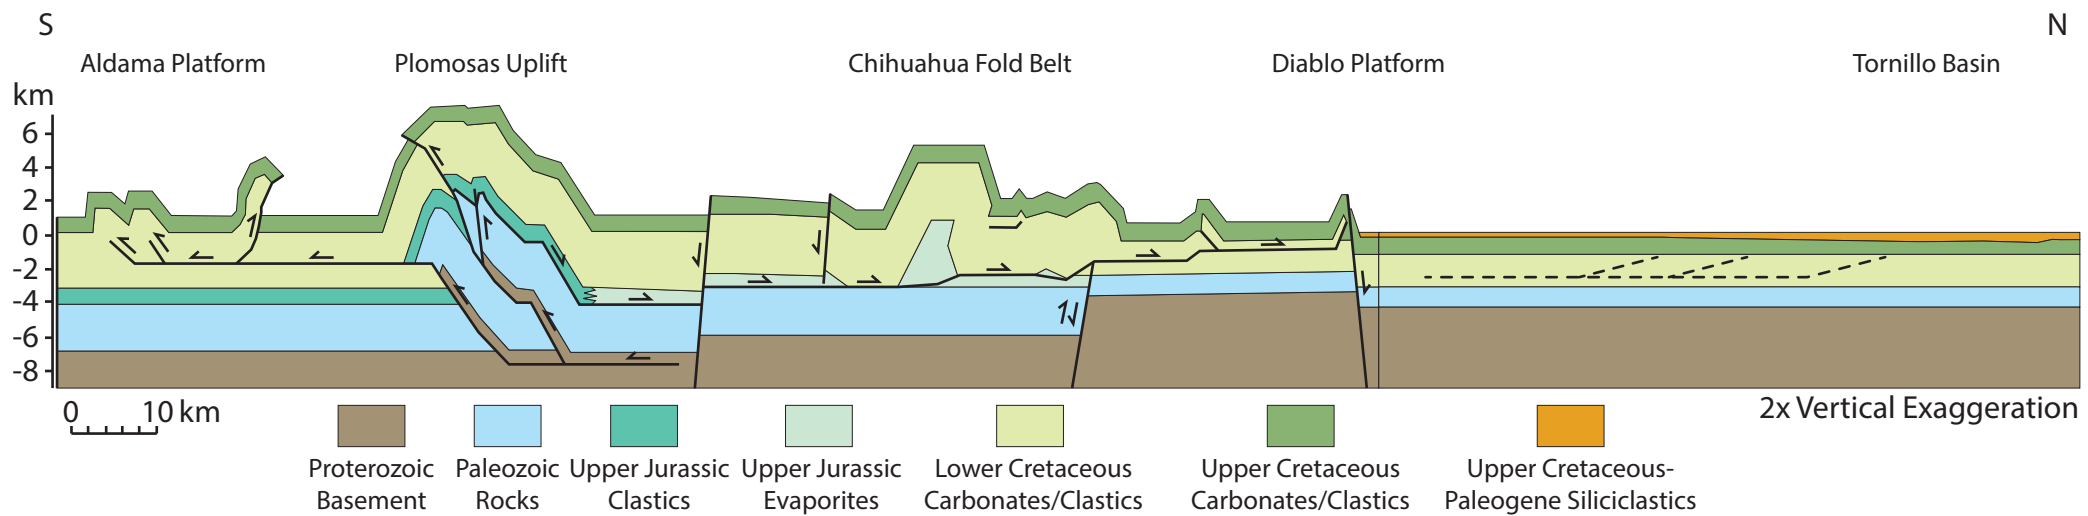

Supplementary Item S1: Balanced cross section through the Chihuahua fold belt from Hennings (1994). Paleozoic and Mesozoic undeformed section thicknesses have been extended north underneath the Tornillo basin. Paleocene Tornillo basin fill thickness adapted from Lehman et al. (2018). Dashed faults under the Tornillo basin schematically illustrate the migration of deformation into the basin in early Eocene.

*Supplementary Item S1.*
