# Supplementary material
Source: publisher figshare collection journal article supplement (https://gsapubs.figshare.com/articles/dataset/_/23787267)

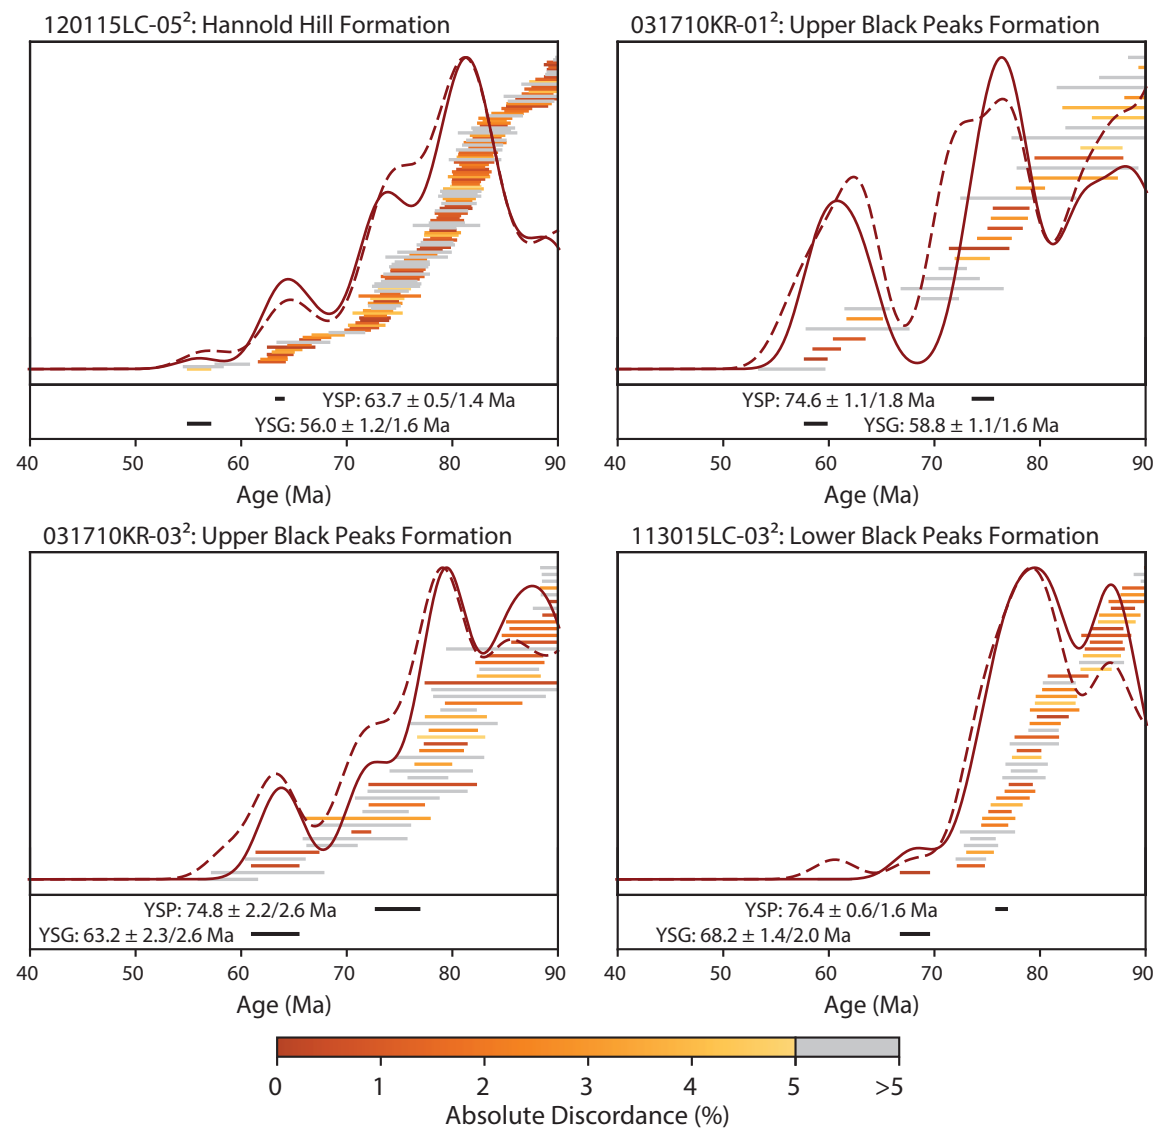

Supplementary Item S8.

Supplement: Supplementary file 1 [file 1]

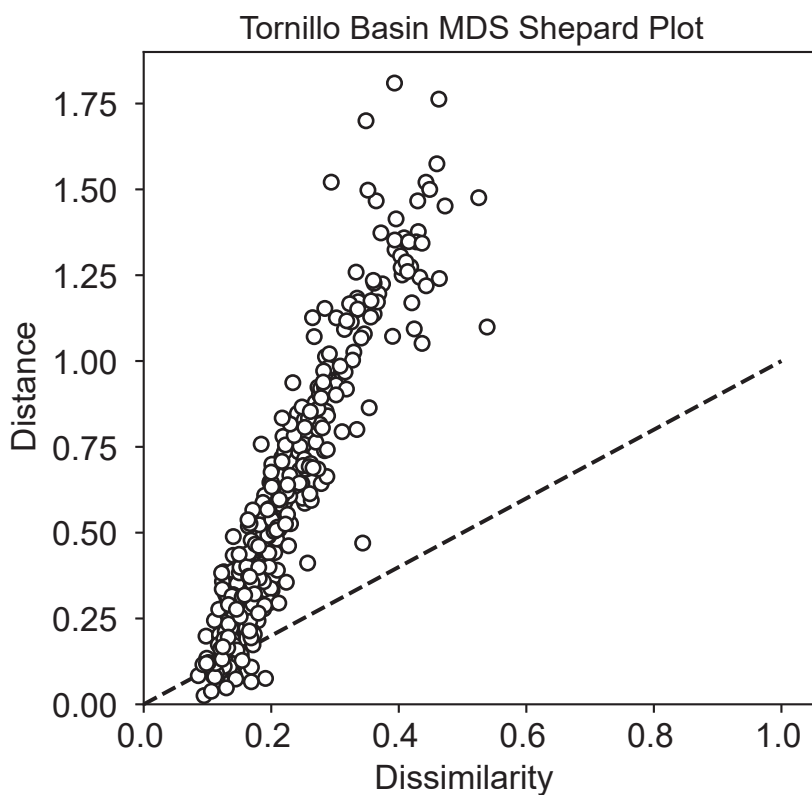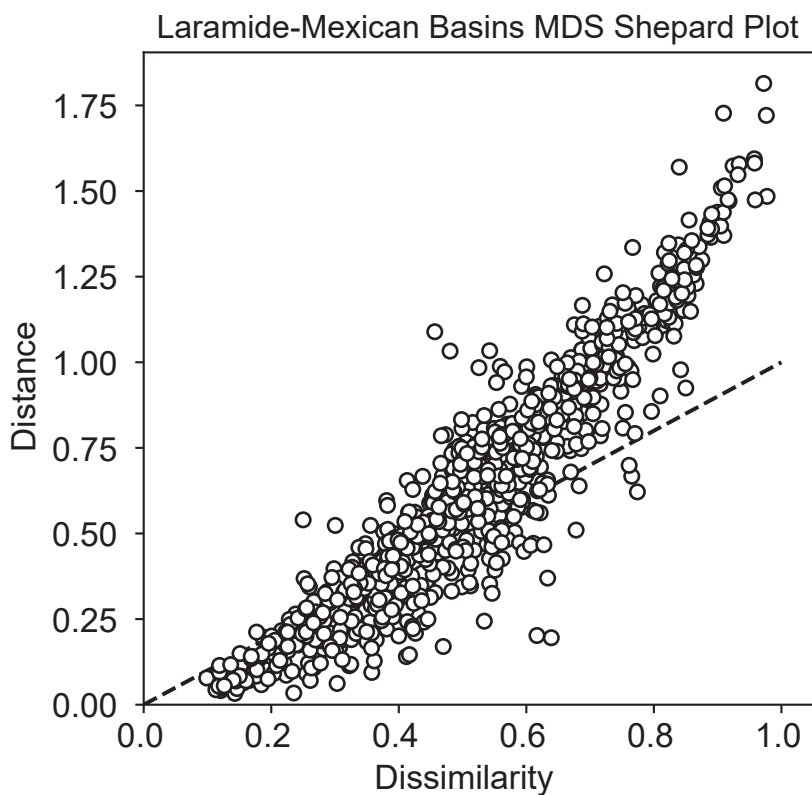

Supplement: Supplementary file 2 [file 1]

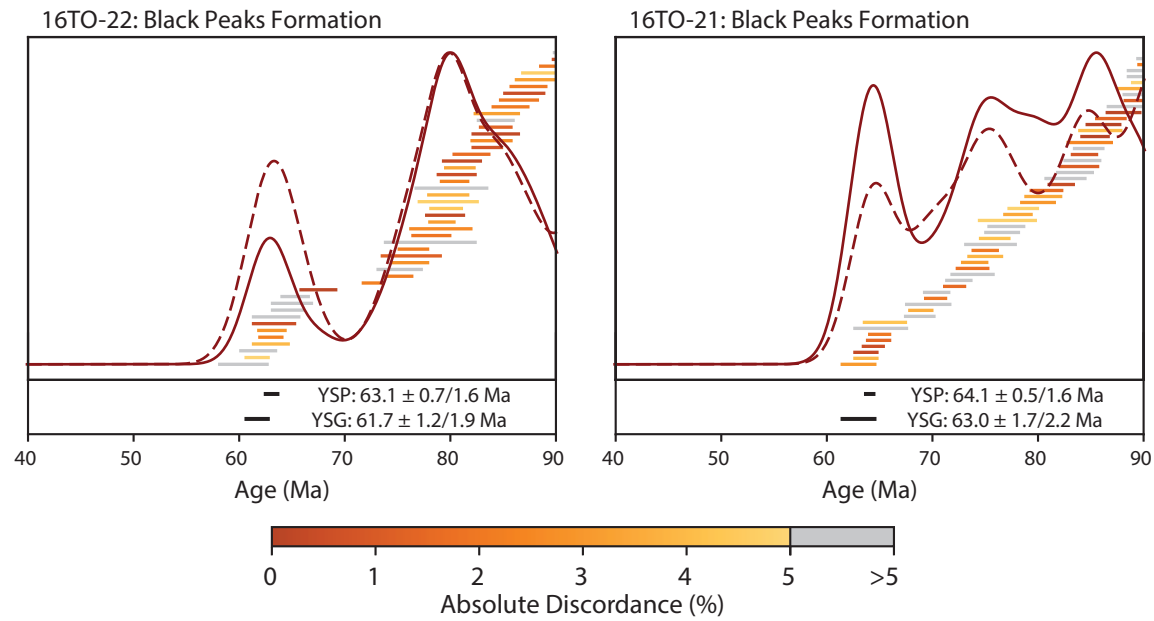

*Supplementary Item S5.*

Supplement: Supplementary file 3 [file 1]

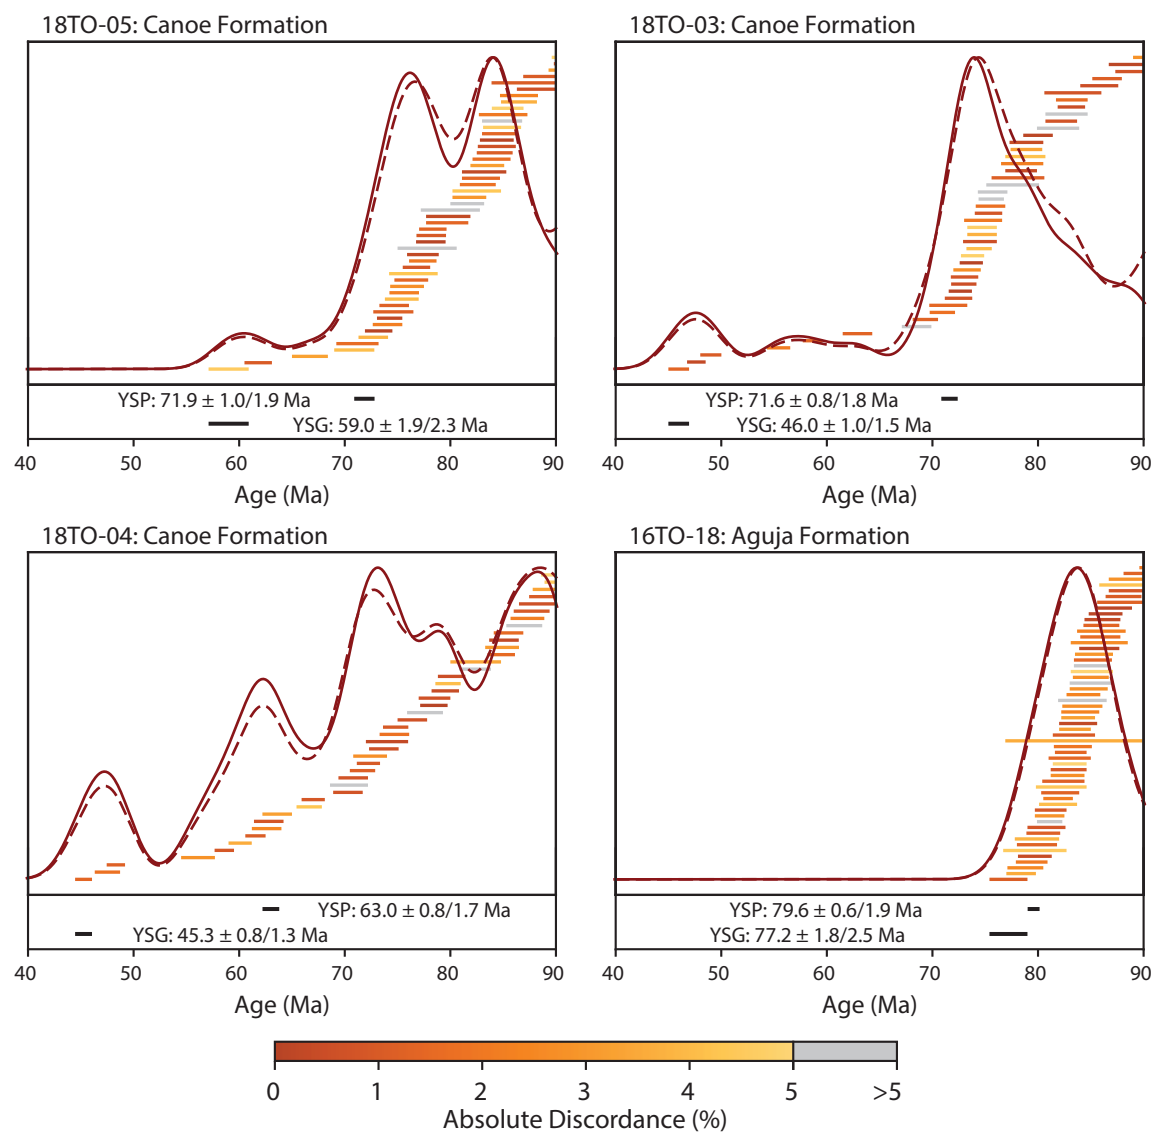

Supplementary Item S4.

Supplement: Supplementary file 4 [file 1]

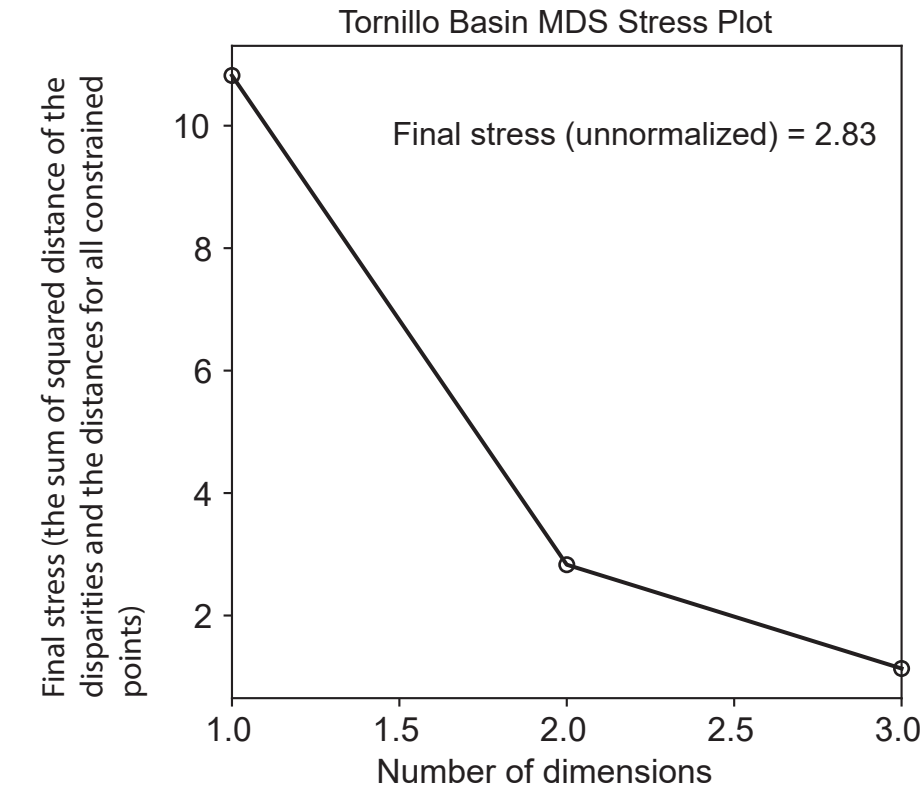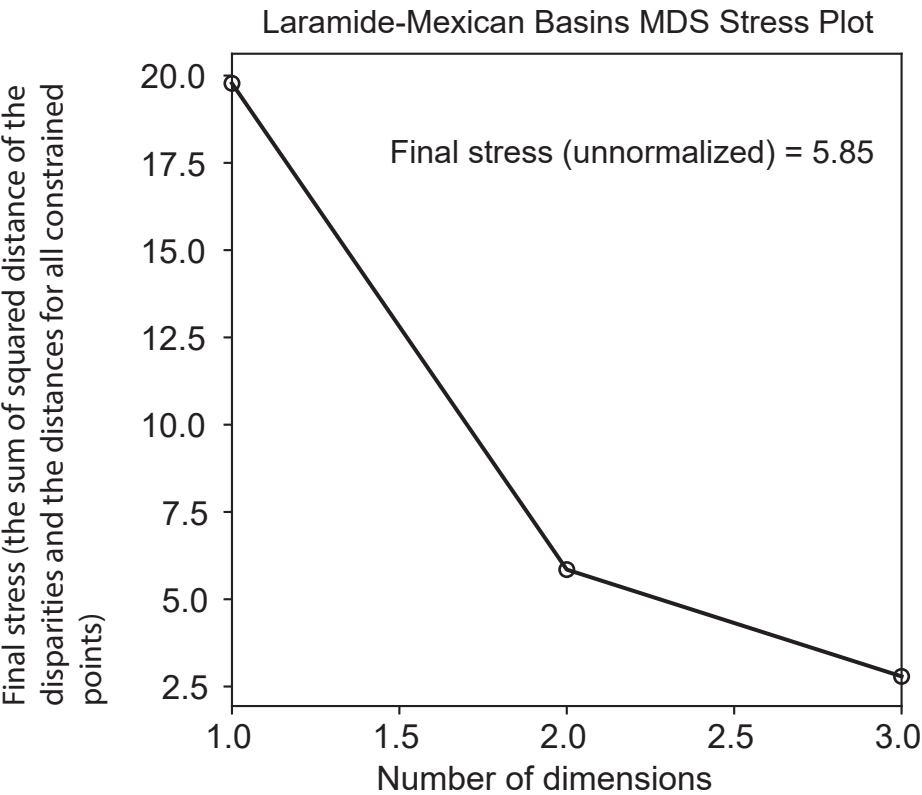

Supplementary Item S10.

Supplement: Supplementary file 6 [file 1]

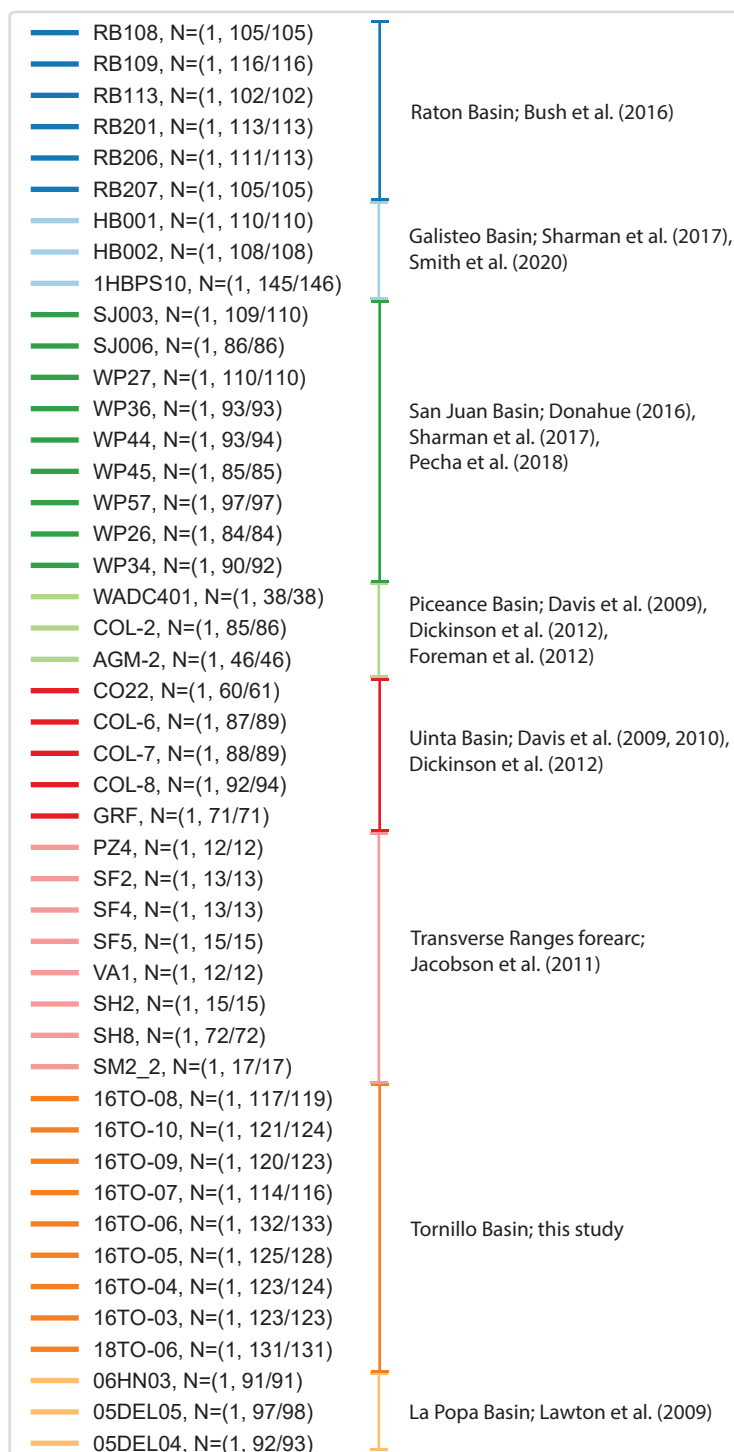

*Supplementary Item S11.*

Supplement: Supplementary file 7 [file 1]

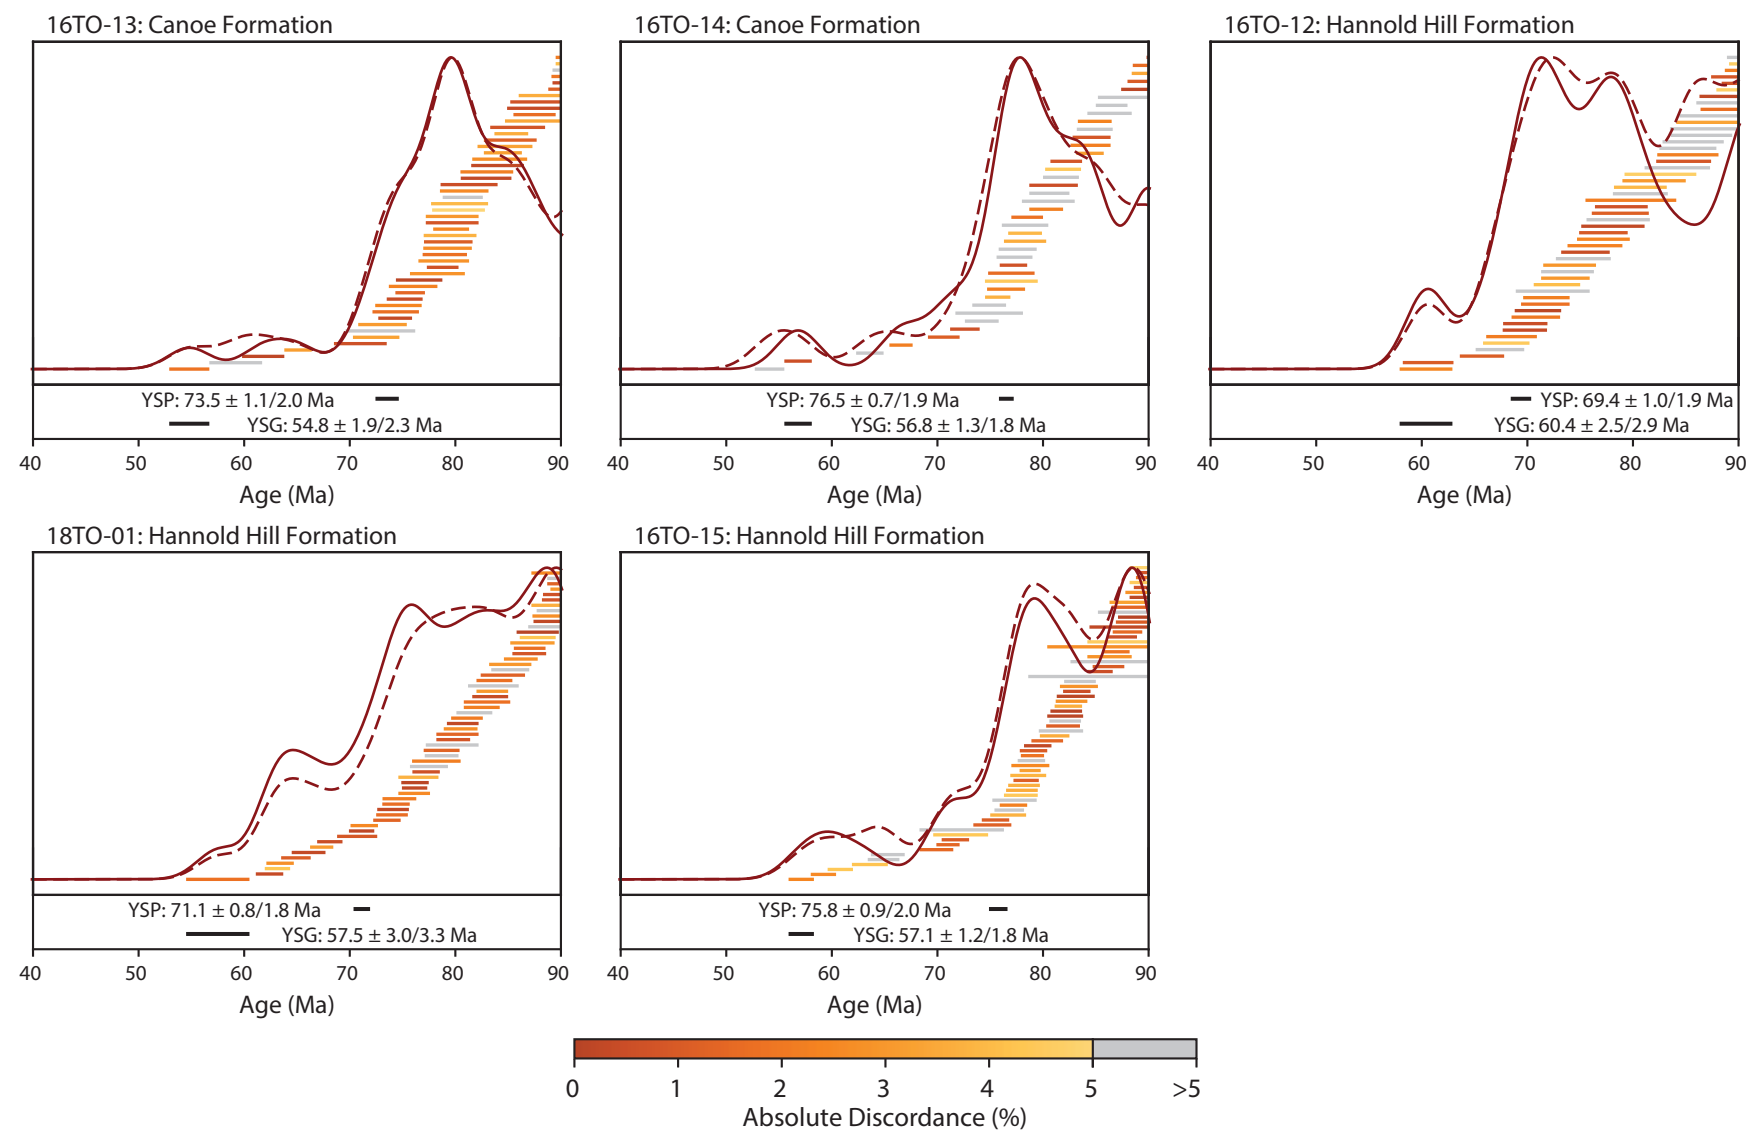

Supplementary Item S7.

Supplement: Supplementary file 8 [file 1]

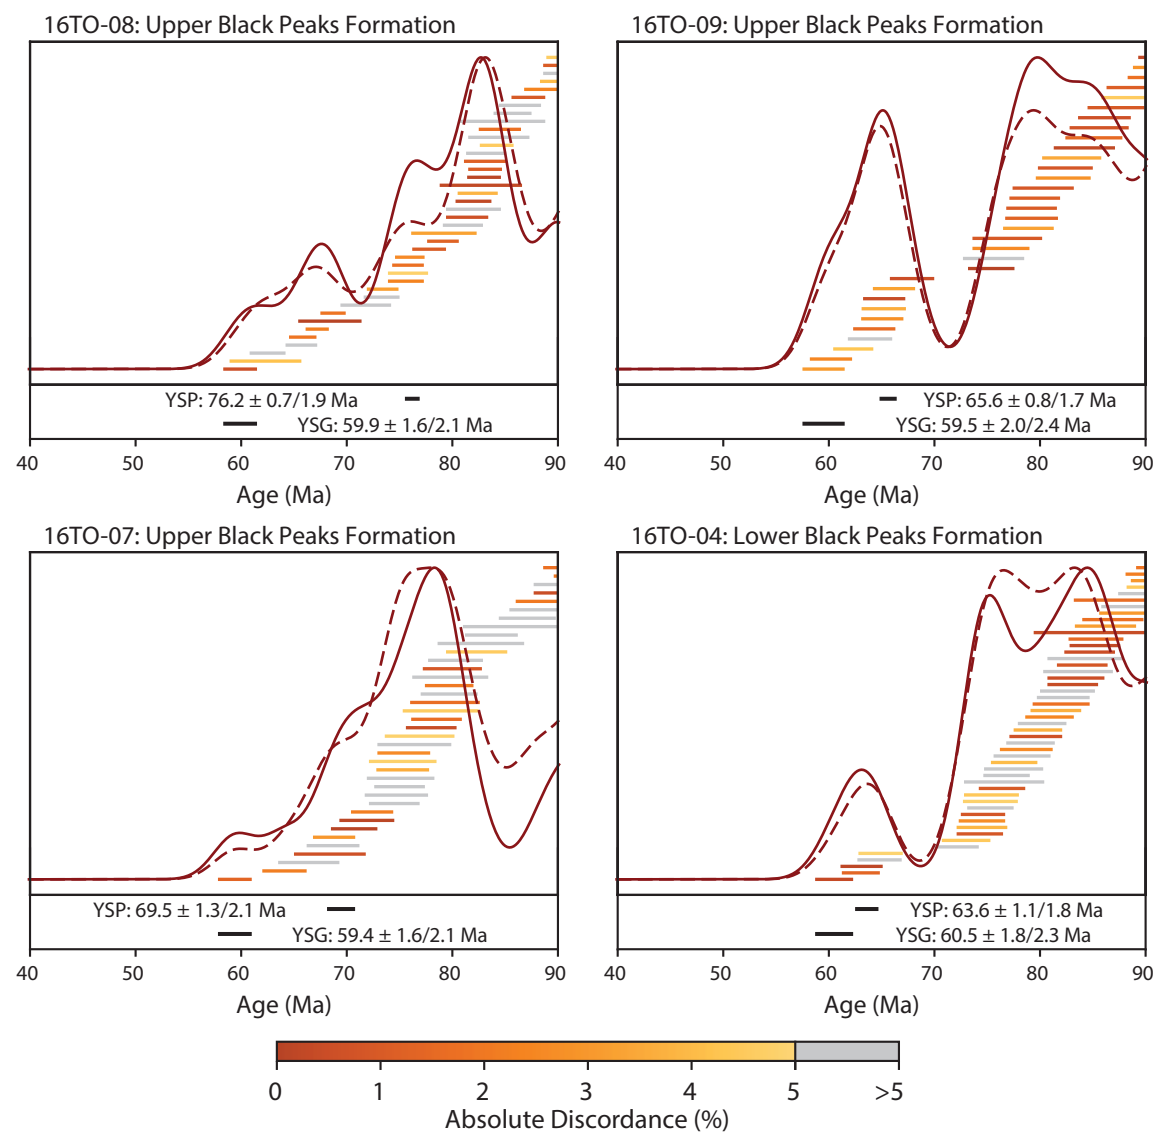

Supplementary Item S6.

Supplement: Supplementary file 9 [file 1]
